# Supplementary material
Source: publisher figshare collection journal article supplement (https://gsajournals.figshare.com/ndownloader/files/13787315)
Supplement: Supplementary file 1 [file 13787315]

## Sheet: Bos taurus
guide: id	mutation format; mode of mutagenesis	guide+PAM sequence	genome coordinate	nucleotide mutation	transcript: id	amino acid mutation	aminoacid: position
ENSBTAT00000000032|19|-|45863295|45863340|30|(ABE;-;@16;NG;GTG:GCG;V:A;)	amino acid mutations; create mode	CAGCACCTTGGCCAAGTCACAG			ENSBTAT00000000032	A	30
ENSBTAT00000000043|19|+|51585629|51585674|13|(ABE;+;@14;NG;GCA:GCG;A:A;)	amino acid mutations; create mode	CAAGGCAGCGGAGCGGGTCCGG			ENSBTAT00000000043	A	13
ENSBTAT00000000043|19|+|51585629|51585674|13|(ABE;+;@16;NG;GCA:GCG;A:A;)	amino acid mutations; create mode	AGGCAGCGGAGCGGGTCCGGAG			ENSBTAT00000000043	A	13
ENSBTAT00000000043|19|+|51585629|51585674|13|(ABE;+;@17;NG;GCA:GCG;A:A;)	amino acid mutations; create mode	GGCAGCGGAGCGGGTCCGGAGG			ENSBTAT00000000043	A	13
ENSBTAT00000000043|19|+|51585629|51585674|13|(ABE;+;@16;NGG;GCA:GCG;A:A;)	amino acid mutations; create mode	AGGCAGCGGAGCGGGTCCGGAGG			ENSBTAT00000000043	A	13
ENSBTAT00000000293|7|+|52669978|52670023|64|(Target-AID;-;@17;NG;GGC:GAC;G:D;)	amino acid mutations; create mode	AGGCCTTTTGTATGCCCCTCGG			ENSBTAT00000000293	D	64
ENSBTAT00000000294|9|+|70188588|70188633|25|(ABE;-;@15;NG;GAT:GAC;D:D;)	amino acid mutations; create mode	CTATCATCTTTAATATCTATGG			ENSBTAT00000000294	D	25
ENSBTAT00000000561|15|+|22572008|22572053|74|(Target-AID;+;@17;NG;TTC:TTT;F:F;)	amino acid mutations; create mode	GTTCCAGGCGTTTCTGGACGTG			ENSBTAT00000000561	F	74
ENSBTAT00000000568|18|+|14767056|14767101|20|(Target-AID;+;@18;NG;TTC:TTT;F:F;)	amino acid mutations; create mode	TTCTGGGAGGTCATCAGCGATG			ENSBTAT00000000568	F	20
ENSBTAT00000000605|22|-|50638189|50638234|128|(Target-AID;+;@18;NG;CTC:TTC;L:F;)	amino acid mutations; create mode	AACTCCGGCTCGCCAGCCTCAG			ENSBTAT00000000605	F	128
ENSBTAT00000000607|22|+|50610800|50610845|7|(Target-AID;+;@18;NG;GGC:GGT;G:G;)	amino acid mutations; create mode	GGCAGCGCGCCCCGCAGAGGCG			ENSBTAT00000000607	G	7
ENSBTAT00000000607|22|+|50610800|50610845|7|(Target-AID;+;@19;NG;GGC:GGT;G:G;)	amino acid mutations; create mode	GCAGCGCGCCCCGCAGAGGCGG			ENSBTAT00000000607	G	7
ENSBTAT00000000607|22|+|50610800|50610845|7|(Target-AID;+;@18;NGG;GGC:GGT;G:G;)	amino acid mutations; create mode	GGCAGCGCGCCCCGCAGAGGCGG			ENSBTAT00000000607	G	7
ENSBTAT00000000691|3|-|106219351|106219396|6|(ABE;+;@14;NG;GGA:GGG;G:G;)	amino acid mutations; create mode	ACAGGGATCAGTGACACTCCAG			ENSBTAT00000000691	G	6
ENSBTAT00000000691|3|-|106219351|106219396|6|(ABE;+;@15;NG;GGA:GGG;G:G;)	amino acid mutations; create mode	CAGGGATCAGTGACACTCCAGG			ENSBTAT00000000691	G	6
ENSBTAT00000000691|3|-|106219351|106219396|6|(ABE;+;@14;NGG;GGA:GGG;G:G;)	amino acid mutations; create mode	ACAGGGATCAGTGACACTCCAGG			ENSBTAT00000000691	G	6
ENSBTAT00000000824|10|+|13507832|13507877|6|(Target-AID;-;@18;NG;CGC:CAC;R:H;)	amino acid mutations; create mode	AGCGTTTGGACCTGAACATACG			ENSBTAT00000000824	H	6
ENSBTAT00000000830|9|+|53228792|53228837|41|(ABE;-;@17;NG;CAT:CAC;H:H;)	amino acid mutations; create mode	AAAATGTTTTCCTCCTCCTCTG			ENSBTAT00000000830	H	41
ENSBTAT00000000968|11|-|93593907|93593952|81|(Target-AID;-;@18;NG;ATG:ATA;M:I;)	amino acid mutations; create mode	AGCATCTTAGGGACAGTGACAG			ENSBTAT00000000968	I	81
ENSBTAT00000001045|3|+|120856443|120856488|34|(Target-AID;-;@17;NG;AAG:AAA;K:K;)	amino acid mutations; create mode	CTGCTTCTTCCCTTCTTCGTCG			ENSBTAT00000001045	K	34
ENSBTAT00000001140|19|+|22457800|22457845|13|(ABE;+;@15;NG;CTA:CTG;L:L;)	amino acid mutations; create mode	AAGCTAGTGACTGGCGGCGGCG			ENSBTAT00000001140	L	13
ENSBTAT00000001140|19|+|22457800|22457845|13|(Target-AID;+;@17;NG;CTA:TTA;L:L;)	amino acid mutations; create mode	AAGCTAGTGACTGGCGGCGGCG			ENSBTAT00000001140	L	13
ENSBTAT00000001140|19|+|22457800|22457845|13|(Target-AID;+;@19;NG;CTA:TTA;L:L;)	amino acid mutations; create mode	GCTAGTGACTGGCGGCGGCGAG			ENSBTAT00000001140	L	13
ENSBTAT00000001140|19|+|22457800|22457845|13|(Target-AID;+;@19;NGG;CTA:TTA;L:L;)	amino acid mutations; create mode	GCTAGTGACTGGCGGCGGCGAGG			ENSBTAT00000001140	L	13
ENSBTAT00000001169|14|-|23177043|23177088|3|(ABE;-;@17;NGG;TTG:CTG;L:L;)	amino acid mutations; create mode	ACAACTTCATGATGGTTTCCTGG			ENSBTAT00000001169	L	3
ENSBTAT00000001169|14|-|23177043|23177088|3|(Target-AID;-;@19;NGG;TTG:TTA;L:L;)	amino acid mutations; create mode	ACAACTTCATGATGGTTTCCTGG			ENSBTAT00000001169	L	3
ENSBTAT00000001169|14|-|23177043|23177088|3|(ABE;-;@17;NG;TTG:CTG;L:L;)	amino acid mutations; create mode	ACAACTTCATGATGGTTTCCTG			ENSBTAT00000001169	L	3
ENSBTAT00000001169|14|-|23177043|23177088|3|(Target-AID;-;@19;NG;TTG:TTA;L:L;)	amino acid mutations; create mode	ACAACTTCATGATGGTTTCCTG			ENSBTAT00000001169	L	3
ENSBTAT00000001187|X|-|79305227|79305272|7|(Target-AID;+;@17;NG;CTG:TTG;L:L;)	amino acid mutations; create mode	AAGCTGACTCTGGACAAGCTGG			ENSBTAT00000001187	L	7
ENSBTAT00000001193|3|-|53751621|53751666|22|(Target-AID;+;@19;NG;CCA:CTA;P:L;)	amino acid mutations; create mode	CCATGGTGGGATGTGTTTACCG			ENSBTAT00000001193	L	22
ENSBTAT00000001235|11|-|106370820|106370865|17|(Target-AID;-;@19;NG;CTG:CTA;L:L;)	amino acid mutations; create mode	GCAGCTTCTCCCGCGCCACCTG			ENSBTAT00000001235	L	17
ENSBTAT00000001235|11|-|106370820|106370865|17|(Target-AID;+;@17;NG;CTG:TTG;L:L;)	amino acid mutations; create mode	AAGCTGCGCAAGTATGTTTTCG			ENSBTAT00000001235	L	17
ENSBTAT00000001432|8|+|571666|571711|42|(Target-AID;-;@18;NGG;AGC:AAC;S:N;)	amino acid mutations; create mode	GGCTCTTGTGGATCTCCTCCTGG			ENSBTAT00000001432	N	42
ENSBTAT00000001432|8|+|571666|571711|42|(Target-AID;-;@18;NG;AGC:AAC;S:N;)	amino acid mutations; create mode	GGCTCTTGTGGATCTCCTCCTG			ENSBTAT00000001432	N	42
ENSBTAT00000001467|19|-|56985209|56985254|29|(ABE;-;@14;NGG;CTG:CCG;L:P;)	amino acid mutations; create mode	ATCCTCAGCTACGAACGCTGCGG			ENSBTAT00000001467	P	29
ENSBTAT00000001467|19|-|56985209|56985254|29|(ABE;-;@15;NG;CTG:CCG;L:P;)	amino acid mutations; create mode	TCCTCAGCTACGAACGCTGCGG			ENSBTAT00000001467	P	29
ENSBTAT00000001467|19|-|56985209|56985254|29|(ABE;-;@14;NG;CTG:CCG;L:P;)	amino acid mutations; create mode	ATCCTCAGCTACGAACGCTGCG			ENSBTAT00000001467	P	29
ENSBTAT00000001474|11|-|19780668|19780713|13|(ABE;-;@16;NGG;TCT:CCT;S:P;)	amino acid mutations; create mode	ACAGACTTCTGAGCTGATGGAGG			ENSBTAT00000001474	P	13
ENSBTAT00000001474|11|-|19780668|19780713|13|(ABE;-;@17;NG;TCT:CCT;S:P;)	amino acid mutations; create mode	CAGACTTCTGAGCTGATGGAGG			ENSBTAT00000001474	P	13
ENSBTAT00000001474|11|-|19780668|19780713|13|(ABE;-;@16;NG;TCT:CCT;S:P;)	amino acid mutations; create mode	ACAGACTTCTGAGCTGATGGAG			ENSBTAT00000001474	P	13
ENSBTAT00000001519|11|+|87912837|87912882|33|(ABE;-;@17;NG;CTT:CCT;L:P;)	amino acid mutations; create mode	TCAAGCTTTTCTGAAATAAAGG			ENSBTAT00000001519	P	33
ENSBTAT00000001599|1|+|57054884|57054929|10|(Target-AID;-;@19;NG;CAG:CAA;Q:Q;)	amino acid mutations; create mode	GCTGCTTTTGCATGTGGCTCTG			ENSBTAT00000001599	Q	10
ENSBTAT00000001731|X|-|57745510|57745555|6|(ABE;+;@16;NG;CAG:CGG;Q:R;)	amino acid mutations; create mode	AAGCAGGGTTCTCAAACCCGTG			ENSBTAT00000001731	R	6
ENSBTAT00000001731|X|-|57745510|57745555|6|(ABE;+;@17;NG;CAG:CGG;Q:R;)	amino acid mutations; create mode	AGCAGGGTTCTCAAACCCGTGG			ENSBTAT00000001731	R	6
ENSBTAT00000001731|X|-|57745510|57745555|6|(ABE;+;@16;NGG;CAG:CGG;Q:R;)	amino acid mutations; create mode	AAGCAGGGTTCTCAAACCCGTGG			ENSBTAT00000001731	R	6
ENSBTAT00000001735|8|-|21767893|21767938|89|(ABE;-;@14;NGG;TGC:CGC;C:R;)	amino acid mutations; create mode	GGGCGCACTTGGGTGTCCGTGGG			ENSBTAT00000001735	R	89
ENSBTAT00000001735|8|-|21767893|21767938|89|(ABE;-;@13;NGG;TGC:CGC;C:R;)	amino acid mutations; create mode	CGGGCGCACTTGGGTGTCCGTGG			ENSBTAT00000001735	R	89
ENSBTAT00000001735|8|-|21767893|21767938|89|(ABE;-;@15;NG;TGC:CGC;C:R;)	amino acid mutations; create mode	GGCGCACTTGGGTGTCCGTGGG			ENSBTAT00000001735	R	89
ENSBTAT00000001735|8|-|21767893|21767938|89|(ABE;-;@14;NG;TGC:CGC;C:R;)	amino acid mutations; create mode	GGGCGCACTTGGGTGTCCGTGG			ENSBTAT00000001735	R	89
ENSBTAT00000001735|8|-|21767893|21767938|89|(ABE;-;@13;NG;TGC:CGC;C:R;)	amino acid mutations; create mode	CGGGCGCACTTGGGTGTCCGTG			ENSBTAT00000001735	R	89
ENSBTAT00000001861|7|+|15998632|15998677|35|(Target-AID;+;@17;NG;CCA:TCA;P:S;)	amino acid mutations; create mode	AAACCAGAACCCTTGGCGAACG			ENSBTAT00000001861	S	35
ENSBTAT00000001867|11|+|29968167|29968212|14|(ABE;-;@14;NG;TCT:TCC;S:S;)	amino acid mutations; create mode	GGCTGGAGACTTAGGGAAGAAG			ENSBTAT00000001867	S	14
ENSBTAT00000001930|29|+|28593666|28593711|12|(Target-AID;+;@17;NG;CCG:TCG;P:S;)	amino acid mutations; create mode	AAGCCGGACGACGACATTCTAG			ENSBTAT00000001930	S	12
ENSBTAT00000001940|3|+|9860233|9860278|24|(Target-AID;+;@17;NG;CCT:TCT;P:S;)	amino acid mutations; create mode	AAGCCTGAGGTGGTGTCGGTGG			ENSBTAT00000001940	S	24
ENSBTAT00000002011|15|+|56972214|56972259|1|(ABE;-;@17;NG;ATG:ACG;M:T;)	amino acid mutations; create mode	GGCATGGTGGGGCTAGAAAGAG			ENSBTAT00000002011	T	1
ENSBTAT00000002011|15|+|56972214|56972259|1|(ABE;-;@15;NG;ATG:ACG;M:T;)	amino acid mutations; create mode	ACGGCATGGTGGGGCTAGAAAG			ENSBTAT00000002011	T	1
ENSBTAT00000002142|23|-|7535100|7535145|78|(Target-AID;+;@17;NG;GTC:GTT;V:V;)	amino acid mutations; create mode	GGTCGCCAAGGAGATCGCCAGG			ENSBTAT00000002142	V	78
ENSBTAT00000002177|29|+|26356907|26356952|13|(Target-AID;+;@18;NG;GCG:GTG;A:V;)	amino acid mutations; create mode	AGCGCAGGGTGTCAACAACGTG			ENSBTAT00000002177	V	13
ENSBTAT00000002229|7|-|5105820|5105865|6|(Target-AID;-;@18;NG;GTG:GTA;V:V;)	amino acid mutations; create mode	TTCACCTTGTCGAACAGCATCG			ENSBTAT00000002229	V	6
ENSBTAT00000002289|11|-|107158114|107158159|23|(Target-AID;+;@17;NG;CGG:TGG;R:W;)	amino acid mutations; create mode	AAGCGGATGGCTGACAGCTTGG			ENSBTAT00000002289	W	23
ENSBTAT00000002397|18|-|56671253|56671298|46|(Target-AID;-;@18;NG;TGC:TAC;C:Y;)	amino acid mutations; create mode	AGCACTTCCGGTCGGTAACCTG			ENSBTAT00000002397	Y	46
ENSBTAT00000002522|8|-|90305473|90305518|5|(Target-AID;+;@19;NG;CAG:TAG;Q:*;)	amino acid mutations; create mode	GCAGATCTACTACTCGGACAAG			ENSBTAT00000002522	*	5
ENSBTAT00000000032|19|-|45863295|45863340|30|(Target-AID;+;@19;NG;GCG:GTG;A:V;)	amino acid mutations; remove mode	GTGCTGCACCAGGAGGACTTGG			ENSBTAT00000000032	V	30
ENSBTAT00000000043|19|+|51585629|51585674|13|(Target-AID;-;@17;NG;GCG:GCA;A:A;)	amino acid mutations; remove mode	CGCTGCCTTGCGCTCGGACCGG			ENSBTAT00000000043	A	13
ENSBTAT00000000091|20|-|30081374|30081419|38|(ABE;+;@13;NG;GCA:GCG;A:A;)	amino acid mutations; remove mode	TCAAGGCGGCCCCAGTCGCGCG			ENSBTAT00000000091	A	38
ENSBTAT00000000491|5|-|89092202|89092247|3|(ABE;+;@13;NG;GAA:GGA;E:G;)	amino acid mutations; remove mode	ATGCAGGGATTCAAAAGTCTGG			ENSBTAT00000000491	G	3
ENSBTAT00000000491|5|-|89092202|89092247|3|(ABE;+;@15;NG;GAA:GGA;E:G;)	amino acid mutations; remove mode	GCAGGGATTCAAAAGTCTGGTG			ENSBTAT00000000491	G	3
ENSBTAT00000000491|5|-|89092202|89092247|3|(ABE;+;@16;NG;GAA:GGA;E:G;)	amino acid mutations; remove mode	CAGGGATTCAAAAGTCTGGTGG			ENSBTAT00000000491	G	3
ENSBTAT00000000491|5|-|89092202|89092247|3|(ABE;+;@15;NGG;GAA:GGA;E:G;)	amino acid mutations; remove mode	GCAGGGATTCAAAAGTCTGGTGG			ENSBTAT00000000491	G	3
ENSBTAT00000000561|15|+|22572008|22572053|74|(ABE;-;@14;NG;TTT:TTC;F:F;)	amino acid mutations; remove mode	CGCCTGGAACTTGCCCTCGCTG			ENSBTAT00000000561	F	74
ENSBTAT00000000568|18|+|14767056|14767101|20|(ABE;-;@13;NGG;TTT:TTC;F:F;)	amino acid mutations; remove mode	CCTCCCAGAACTGCAGGGAAAGG			ENSBTAT00000000568	F	20
ENSBTAT00000000568|18|+|14767056|14767101|20|(ABE;-;@13;NG;TTT:TTC;F:F;)	amino acid mutations; remove mode	CCTCCCAGAACTGCAGGGAAAG			ENSBTAT00000000568	F	20
ENSBTAT00000000601|6|+|67822201|67822246|40|(ABE;-;@13;NGG;TTC:TCC;F:S;)	amino acid mutations; remove mode	CTGGGAGGACTTGCCCCCGCAGG			ENSBTAT00000000601	S	40
ENSBTAT00000000601|6|+|67822201|67822246|40|(ABE;-;@13;NG;TTC:TCC;F:S;)	amino acid mutations; remove mode	CTGGGAGGACTTGCCCCCGCAG			ENSBTAT00000000601	S	40
ENSBTAT00000000626|7|-|70838619|70838664|23|(ABE;+;@14;NG;GGA:GGG;G:G;)	amino acid mutations; remove mode	GAAAGGGGCATATGTGTCTCAG			ENSBTAT00000000626	G	23
ENSBTAT00000000626|7|-|70838619|70838664|23|(ABE;+;@17;NG;GGA:GGG;G:G;)	amino acid mutations; remove mode	AGGGGCATATGTGTCTCAGGTG			ENSBTAT00000000626	G	23
ENSBTAT00000000626|7|-|70838619|70838664|23|(ABE;+;@14;NGG;GGA:GGG;G:G;)	amino acid mutations; remove mode	GAAAGGGGCATATGTGTCTCAGG			ENSBTAT00000000626	G	23
ENSBTAT00000000626|7|-|70838619|70838664|23|(ABE;+;@17;NGG;GGA:GGG;G:G;)	amino acid mutations; remove mode	AGGGGCATATGTGTCTCAGGTGG			ENSBTAT00000000626	G	23
ENSBTAT00000000824|10|+|13507832|13507877|6|(ABE;+;@15;NG;CAC:CGC;H:R;)	amino acid mutations; remove mode	CAAACGCTCGGGGCTGGTGCGG			ENSBTAT00000000824	R	6
ENSBTAT00000000875|19|-|42941392|42941437|8|(ABE;+;@14;NG;ATC:GTC;I:V;)	amino acid mutations; remove mode	CCTTAGGTCTCCTGGGCCACCG			ENSBTAT00000000875	V	8
ENSBTAT00000000968|11|-|93593907|93593952|81|(ABE;+;@14;NG;ATA:ATG;I:M;)	amino acid mutations; remove mode	TAAGATGCTCGTGATCATGCAG			ENSBTAT00000000968	M	81
ENSBTAT00000000986|27|-|25449396|25449441|130|(ABE;-;@16;NG;ATT:ATC;I:I;)	amino acid mutations; remove mode	ATGTGATCTTCTGGGTCAAGAG			ENSBTAT00000000986	I	130
ENSBTAT00000000986|27|-|25449396|25449441|130|(ABE;-;@14;NG;ATT:ATC;I:I;)	amino acid mutations; remove mode	AGATGTGATCTTCTGGGTCAAG			ENSBTAT00000000986	I	130
ENSBTAT00000000989|27|+|25462509|25462554|5|(ABE;-;@13;NGG;ATT:ACT;I:T;)	amino acid mutations; remove mode	CTTTTGAGTCTTCTCCGCCATGG			ENSBTAT00000000989	T	5
ENSBTAT00000000989|27|+|25462509|25462554|5|(ABE;-;@14;NG;ATT:ACT;I:T;)	amino acid mutations; remove mode	TTTTGAGTCTTCTCCGCCATGG			ENSBTAT00000000989	T	5
ENSBTAT00000000989|27|+|25462509|25462554|5|(ABE;-;@13;NG;ATT:ACT;I:T;)	amino acid mutations; remove mode	CTTTTGAGTCTTCTCCGCCATG			ENSBTAT00000000989	T	5
ENSBTAT00000001140|19|+|22457800|22457845|13|(ABE;-;@14;NG;TTA:CTA;L:L;)	amino acid mutations; remove mode	TCACTAGCTTCTCGCCCAGCAG			ENSBTAT00000001140	L	13
ENSBTAT00000001140|19|+|22457800|22457845|13|(ABE;+;@15;NG;TTA:TTG;L:L;)	amino acid mutations; remove mode	AAGCTAGTGACTGGCGGCGGCG			ENSBTAT00000001140	L	13
ENSBTAT00000001140|19|+|22457800|22457845|13|(Target-AID;+;@17;NG;CTG:TTG;L:L;)	amino acid mutations; remove mode	AAGCTAGTGACTGGCGGCGGCG			ENSBTAT00000001140	L	13
ENSBTAT00000001140|19|+|22457800|22457845|13|(Target-AID;+;@19;NG;CTG:TTG;L:L;)	amino acid mutations; remove mode	GCTAGTGACTGGCGGCGGCGAG			ENSBTAT00000001140	L	13
ENSBTAT00000001140|19|+|22457800|22457845|13|(Target-AID;+;@19;NGG;CTG:TTG;L:L;)	amino acid mutations; remove mode	GCTAGTGACTGGCGGCGGCGAGG			ENSBTAT00000001140	L	13
ENSBTAT00000001146|23|-|7810370|7810415|38|(ABE;-;@13;NG;CTC:CCC;L:P;)	amino acid mutations; remove mode	GATGAGGGGCTTGCACACCGTG			ENSBTAT00000001146	P	38
ENSBTAT00000001169|14|-|23177043|23177088|3|(ABE;-;@17;NGG;TTA:CTA;L:L;)	amino acid mutations; remove mode	ACAACTTCATGATGGTTTCCTGG			ENSBTAT00000001169	L	3
ENSBTAT00000001169|14|-|23177043|23177088|3|(ABE;-;@17;NG;TTA:CTA;L:L;)	amino acid mutations; remove mode	ACAACTTCATGATGGTTTCCTG			ENSBTAT00000001169	L	3
ENSBTAT00000001169|14|-|23177043|23177088|3|(Target-AID;-;@19;NGG;CTG:CTA;L:L;)	amino acid mutations; remove mode	ACAACTTCATGATGGTTTCCTGG			ENSBTAT00000001169	L	3
ENSBTAT00000001169|14|-|23177043|23177088|3|(Target-AID;-;@19;NG;CTG:CTA;L:L;)	amino acid mutations; remove mode	ACAACTTCATGATGGTTTCCTG			ENSBTAT00000001169	L	3
ENSBTAT00000001176|8|-|99850787|99850832|28|(ABE;+;@15;NG;TTA:TTG;L:L;)	amino acid mutations; remove mode	AAGTTGACGCCACTTTCACATG			ENSBTAT00000001176	L	28
ENSBTAT00000001187|X|-|79305227|79305272|7|(ABE;+;@14;NG;CTA:CTG;L:L;)	amino acid mutations; remove mode	CAAGCTGACTCTGGACAAGCTG			ENSBTAT00000001187	L	7
ENSBTAT00000001187|X|-|79305227|79305272|7|(ABE;+;@15;NG;CTA:CTG;L:L;)	amino acid mutations; remove mode	AAGCTGACTCTGGACAAGCTGG			ENSBTAT00000001187	L	7
ENSBTAT00000001187|X|-|79305227|79305272|7|(Target-AID;+;@17;NG;CTA:TTA;L:L;)	amino acid mutations; remove mode	AAGCTGACTCTGGACAAGCTGG			ENSBTAT00000001187	L	7
ENSBTAT00000001187|X|-|79305227|79305272|7|(ABE;+;@14;NGG;CTA:CTG;L:L;)	amino acid mutations; remove mode	CAAGCTGACTCTGGACAAGCTGG			ENSBTAT00000001187	L	7
ENSBTAT00000001187|X|-|79305227|79305272|7|(ABE;-;@13;NG;TTG:CTG;L:L;)	amino acid mutations; remove mode	AGAGTCAGCTTGTTAGAAAGCG			ENSBTAT00000001187	L	7
ENSBTAT00000001193|3|-|53751621|53751666|22|(ABE;-;@13;NG;CTA:CCA;L:P;)	amino acid mutations; remove mode	CCACCATGGCTTCAGCACCCGG			ENSBTAT00000001193	P	22
ENSBTAT00000001199|1|+|136573389|136573434|14|(Target-AID;+;@19;NG;CTC:TTC;L:F;)	amino acid mutations; remove mode	ATTCAAGTTGGTCTTCCTGGGG			ENSBTAT00000001199	F	14
ENSBTAT00000001199|1|+|136573389|136573434|14|(Target-AID;+;@19;NGG;CTC:TTC;L:F;)	amino acid mutations; remove mode	ATTCAAGTTGGTCTTCCTGGGGG			ENSBTAT00000001199	F	14
ENSBTAT00000001235|11|-|106370820|106370865|17|(Target-AID;+;@17;NG;CTA:TTA;L:L;)	amino acid mutations; remove mode	AAGCTGCGCAAGTATGTTTTCG			ENSBTAT00000001235	L	17
ENSBTAT00000001235|11|-|106370820|106370865|17|(Target-AID;-;@19;NG;TTG:TTA;L:L;)	amino acid mutations; remove mode	GCAGCTTCTCCCGCGCCACCTG			ENSBTAT00000001235	L	17
ENSBTAT00000001304|15|+|35500391|35500436|5|(ABE;+;@15;NG;ATG:GTG;M:V;)	amino acid mutations; remove mode	GGAAGGTGGCCCGAGAATTCCG			ENSBTAT00000001304	V	5
ENSBTAT00000001304|15|+|35500391|35500436|5|(ABE;+;@15;NGG;ATG:GTG;M:V;)	amino acid mutations; remove mode	GGAAGGTGGCCCGAGAATTCCGG			ENSBTAT00000001304	V	5
ENSBTAT00000001404|X|+|39912417|39912462|59|(ABE;+;@16;NG;AAC:GAC;N:D;)	amino acid mutations; remove mode	CAAGGACTACTGCAAGGGTGAG			ENSBTAT00000001404	D	59
ENSBTAT00000001404|X|+|39912417|39912462|59|(ABE;+;@16;NGG;AAC:GAC;N:D;)	amino acid mutations; remove mode	CAAGGACTACTGCAAGGGTGAGG			ENSBTAT00000001404	D	59
ENSBTAT00000001464|16|+|57698908|57698953|11|(ABE;+;@17;NG;AAT:GAT;N:D;)	amino acid mutations; remove mode	AAAGATCTAGAAGAGGTGAAGG			ENSBTAT00000001464	D	11
ENSBTAT00000001467|19|-|56985209|56985254|29|(Target-AID;+;@18;NG;CCG:CTG;P:L;)	amino acid mutations; remove mode	GCTGAGGATGTCCCAGGCCTTG			ENSBTAT00000001467	L	29
ENSBTAT00000001467|19|-|56985209|56985254|29|(Target-AID;+;@18;NGG;CCG:CTG;P:L;)	amino acid mutations; remove mode	GCTGAGGATGTCCCAGGCCTTGG			ENSBTAT00000001467	L	29
ENSBTAT00000001477|7|+|23489436|23489481|3|(ABE;-;@15;NG;CCT:CCC;P:P;)	amino acid mutations; remove mode	TCCCAGGGTTTCATGGTCACAG			ENSBTAT00000001477	P	3
ENSBTAT00000001479|7|+|23489436|23489481|3|(ABE;-;@15;NG;CCT:CCC;P:P;)	amino acid mutations; remove mode	TCCCAGGGTTTCATGGTCACAG			ENSBTAT00000001479	P	3
ENSBTAT00000001557|14|+|23675528|23675573|37|(ABE;+;@14;NG;CCA:CCG;P:P;)	amino acid mutations; remove mode	GAAACCGGTAAGGCTGGGGATG			ENSBTAT00000001557	P	37
ENSBTAT00000001557|14|+|23675528|23675573|37|(ABE;+;@14;NGG;CCA:CCG;P:P;)	amino acid mutations; remove mode	GAAACCGGTAAGGCTGGGGATGG			ENSBTAT00000001557	P	37
ENSBTAT00000001599|1|+|57054884|57054929|10|(ABE;+;@15;NG;CAA:CAG;Q:Q;)	amino acid mutations; remove mode	AAGCAGCTGGATTTACAGAATG			ENSBTAT00000001599	Q	10
ENSBTAT00000001599|1|+|57054884|57054929|10|(ABE;+;@16;NG;CAA:CAG;Q:Q;)	amino acid mutations; remove mode	AGCAGCTGGATTTACAGAATGG			ENSBTAT00000001599	Q	10
ENSBTAT00000001599|1|+|57054884|57054929|10|(ABE;+;@15;NGG;CAA:CAG;Q:Q;)	amino acid mutations; remove mode	AAGCAGCTGGATTTACAGAATGG			ENSBTAT00000001599	Q	10
ENSBTAT00000001734|13|-|48486184|48486229|30|(ABE;+;@15;NG;CGA:CGG;R:R;)	amino acid mutations; remove mode	AAACGGGAAGATGTGTTTAAAG			ENSBTAT00000001734	R	30
ENSBTAT00000001799|12|+|34545462|34545507|25|(Target-AID;-;@19;NG;CGG:CAG;R:Q;)	amino acid mutations; remove mode	CTGCTTGCAGGTGTCCTGTGAG			ENSBTAT00000001799	Q	25
ENSBTAT00000001812|13|-|60443892|60443937|11|(Target-AID;-;@19;NG;CGG:CGA;R:R;)	amino acid mutations; remove mode	CTCGCTTACTCATAAGCACATG			ENSBTAT00000001812	R	11
ENSBTAT00000001840|16|-|45903668|45903713|48|(Target-AID;-;@19;NGG;CGG:CGA;R:R;)	amino acid mutations; remove mode	GTCGTTTGAAATTGTTGGCCCGG			ENSBTAT00000001840	R	48
ENSBTAT00000001840|16|-|45903668|45903713|48|(Target-AID;-;@19;NG;CGG:CGA;R:R;)	amino acid mutations; remove mode	GTCGTTTGAAATTGTTGGCCCG			ENSBTAT00000001840	R	48
ENSBTAT00000001886|22|+|44449132|44449177|16|(ABE;-;@14;NG;TCC:CCC;S:P;)	amino acid mutations; remove mode	GTGAGGGTTTGCTTTCCCCAAG			ENSBTAT00000001886	P	16
ENSBTAT00000001923|25|+|34992997|34993042|51|(ABE;+;@17;NG;AGC:GGC;S:G;)	amino acid mutations; remove mode	AAGGGCCAGCGCTTCGGACTGG			ENSBTAT00000001923	G	51
ENSBTAT00000001923|25|+|34992997|34993042|51|(ABE;+;@17;NGG;AGC:GGC;S:G;)	amino acid mutations; remove mode	AAGGGCCAGCGCTTCGGACTGGG			ENSBTAT00000001923	G	51
ENSBTAT00000001940|3|+|9860233|9860278|24|(ABE;-;@13;NG;TCT:CCT;S:P;)	amino acid mutations; remove mode	ACCTCAGGCTTCCCTCGACCTG			ENSBTAT00000001940	P	24
ENSBTAT00000001967|3|+|28948278|28948323|6|(ABE;+;@16;NG;AGC:GGC;S:G;)	amino acid mutations; remove mode	CAAAGGCGGCGGCGAGGCTGAG			ENSBTAT00000001967	G	6
ENSBTAT00000002055|11|-|29431912|29431957|3|(ABE;+;@14;NG;ACT:GCT;T:A;)	amino acid mutations; remove mode	TTTTAGGCTGACCAACTGACTG			ENSBTAT00000002055	A	3
ENSBTAT00000002055|11|-|29431912|29431957|3|(ABE;+;@17;NG;ACT:GCT;T:A;)	amino acid mutations; remove mode	TAGGCTGACCAACTGACTGAAG			ENSBTAT00000002055	A	3
ENSBTAT00000002073|4|+|99119055|99119100|11|(ABE;+;@16;NG;ACT:GCT;T:A;)	amino acid mutations; remove mode	CAAGGCTAAGGTGCCCATCTTG			ENSBTAT00000002073	A	11
ENSBTAT00000002073|4|+|99119055|99119100|11|(ABE;+;@16;NGG;ACT:GCT;T:A;)	amino acid mutations; remove mode	CAAGGCTAAGGTGCCCATCTTGG			ENSBTAT00000002073	A	11
ENSBTAT00000002103|7|-|2589369|2589414|22|(ABE;+;@16;NG;ACA:GCA;T:A;)	amino acid mutations; remove mode	GAAGGCAGGTGGGTCGGCCGTG			ENSBTAT00000002103	A	22
ENSBTAT00000002106|6|+|69388854|69388899|39|(Target-AID;+;@18;NG;ACC:ATC;T:I;)	amino acid mutations; remove mode	GATCTACCACACCCTTAATAAG			ENSBTAT00000002106	I	39
ENSBTAT00000002142|23|-|7535100|7535145|78|(ABE;-;@17;NGG;GTT:GTC;V:V;)	amino acid mutations; remove mode	GGCGACCTTCTCGTTGGGGCAGG			ENSBTAT00000002142	V	78
ENSBTAT00000002142|23|-|7535100|7535145|78|(ABE;-;@17;NG;GTT:GTC;V:V;)	amino acid mutations; remove mode	GGCGACCTTCTCGTTGGGGCAG			ENSBTAT00000002142	V	78
ENSBTAT00000002142|23|-|7535100|7535145|78|(ABE;-;@14;NG;GTT:GTC;V:V;)	amino acid mutations; remove mode	CTTGGCGACCTTCTCGTTGGGG			ENSBTAT00000002142	V	78
ENSBTAT00000002182|18|+|36607676|36607721|16|(Target-AID;-;@18;NGG;GTA:ATA;V:I;)	amino acid mutations; remove mode	TATCTTCTCAAACATTACTCGGG			ENSBTAT00000002182	I	16
ENSBTAT00000002182|18|+|36607676|36607721|16|(Target-AID;-;@19;NG;GTA:ATA;V:I;)	amino acid mutations; remove mode	ATCTTCTCAAACATTACTCGGG			ENSBTAT00000002182	I	16
ENSBTAT00000002182|18|+|36607676|36607721|16|(Target-AID;-;@18;NG;GTA:ATA;V:I;)	amino acid mutations; remove mode	TATCTTCTCAAACATTACTCGG			ENSBTAT00000002182	I	16
ENSBTAT00000002229|7|-|5105820|5105865|6|(ABE;+;@14;NG;GTA:GTG;V:V;)	amino acid mutations; remove mode	CAAGGTGAAGGCATTCGTAGTG			ENSBTAT00000002229	V	6
ENSBTAT00000002397|18|-|56671253|56671298|46|(ABE;+;@14;NG;TAC:TGC;Y:C;)	amino acid mutations; remove mode	GGAAGTGCTCCCGAAACCAGGG			ENSBTAT00000002397	C	46
5:70323098-70323098+|Target-AID|-|G:A|CGG:CAG|nucleotide|(Target-AID;-;@19;NGG;CGG:CAG;R:Q;)	nucleotide mutations; create mode	CCGGAAGGCACTCCTTTGGTGGG	5:70323098-70323098+	T
5:70323098-70323098+|Target-AID|-|G:A|CGG:CAG|nucleotide|(Target-AID;-;@19;NG;CGG:CAG;R:Q;)	nucleotide mutations; create mode	CCGGAAGGCACTCCTTTGGTGG	5:70323098-70323098+	T
21:22071836-22071836+|Target-AID|-|G:A|TGC:TAC|nucleotide|(Target-AID;-;@17;NG;TGC:TAC;C:Y;)	nucleotide mutations; create mode	CGGCAACGCATCAGCGTTCCAG	21:22071836-22071836+	T
9:70180954-70180954+|Target-AID|-|G:A|TGC:TAC|nucleotide|(Target-AID;-;@17;NG;TGC:TAC;C:Y;)	nucleotide mutations; create mode	GGGCAAAGGGCGGTGGTAGCGG	9:70180954-70180954+	T
17:65678354-65678354+|Target-AID|-|G:A|AGT:AAT|nucleotide|(Target-AID;-;@19;NG;AGT:AAT;S:N;)	nucleotide mutations; create mode	ACTGCTGCCAGCTGCTTCAAAG	17:65678354-65678354+	T
1:144790231-144790231-|Target-AID|-|G:A|AGT:AAT|nucleotide|(Target-AID;-;@17;NGG;AGT:AAT;S:N;)	nucleotide mutations; create mode	GGACTGACCAACGCACAAAAAGG	1:144790231-144790231-	T
1:144790231-144790231-|Target-AID|-|G:A|AGT:AAT|nucleotide|(Target-AID;-;@18;NG;AGT:AAT;S:N;)	nucleotide mutations; create mode	GACTGACCAACGCACAAAAAGG	1:144790231-144790231-	T
1:144790231-144790231-|Target-AID|-|G:A|AGT:AAT|nucleotide|(Target-AID;-;@17;NG;AGT:AAT;S:N;)	nucleotide mutations; create mode	GGACTGACCAACGCACAAAAAG	1:144790231-144790231-	T
5:112192330-112192330+|Target-AID|-|G:A|AGC:AAC|nucleotide|(Target-AID;-;@19;NG;AGC:AAC;S:N;)	nucleotide mutations; create mode	GCTGCTGCTGCTGCTGCTGCTG	5:112192330-112192330+	T
12:36782663-36782663-|Target-AID|-|G:A|AGC:AAC|nucleotide|(Target-AID;-;@19;NG;AGC:AAC;S:N;)	nucleotide mutations; create mode	GCTTGGTTGTCATTCCTTTGAG	12:36782663-36782663-	T
12:36782663-36782663-|Target-AID|-|G:A|AGC:AAC|nucleotide|(Target-AID;-;@17;NG;AGC:AAC;S:N;)	nucleotide mutations; create mode	GAGCTTGGTTGTCATTCCTTTG	12:36782663-36782663-	T
11:103884649-103884649-|Target-AID|-|G:A|TGG:TAG|nucleotide|(Target-AID;-;@19;NGG;TGG:TAG;W:*;)	nucleotide mutations; create mode	CCAACATTCTGGGTGCCCTTGGG	11:103884649-103884649-	T
11:103884649-103884649-|Target-AID|-|G:A|TGG:TAG|nucleotide|(Target-AID;-;@19;NG;TGG:TAG;W:*;)	nucleotide mutations; create mode	CCAACATTCTGGGTGCCCTTGG	11:103884649-103884649-	T
16:52158365-52158365+|Target-AID|-|G:A|TGA:TAA|nucleotide|(Target-AID;-;@19;NGG;TGA:TAA;*:*;)	nucleotide mutations; create mode	TCAGTCTAATCCACTAAGACAGG	16:52158365-52158365+	T
16:52158365-52158365+|Target-AID|-|G:A|TGA:TAA|nucleotide|(Target-AID;-;@19;NG;TGA:TAA;*:*;)	nucleotide mutations; create mode	TCAGTCTAATCCACTAAGACAG	16:52158365-52158365+	T
14:65584387-65584387+|Target-AID|-|G:A|TGA:TAA|nucleotide|(Target-AID;-;@19;NG;TGA:TAA;*:*;)	nucleotide mutations; create mode	TCAAACGCTGCTATGGCAACCG	14:65584387-65584387+	T
4:51294435-51294435+|Target-AID|-|G:A|CGC:CAC|nucleotide|(Target-AID;-;@18;NG;CGC:CAC;R:H;)	nucleotide mutations; create mode	CGCGCCAGCGTTGAGGCTTTGG	4:51294435-51294435+	T
14:72678494-72678494-|Target-AID|-|G:A|TGT:TAT|nucleotide|(Target-AID;-;@19;NG;TGT:TAT;C:Y;)	nucleotide mutations; create mode	ACAAGAGTACTGGAGTGGGGTG	14:72678494-72678494-	T
14:72678494-72678494-|Target-AID|-|G:A|TGT:TAT|nucleotide|(Target-AID;-;@17;NG;TGT:TAT;C:Y;)	nucleotide mutations; create mode	AGACAAGAGTACTGGAGTGGGG	14:72678494-72678494-	T
26:21290976-21290976+|Target-AID|-|G:A|CGT:CAT|nucleotide|(Target-AID;-;@18;NGG;CGT:CAT;R:H;)	nucleotide mutations; create mode	AACGCCGGCCCGAGCCCTTGGGG	26:21290976-21290976+	T
26:21290976-21290976+|Target-AID|-|G:A|CGT:CAT|nucleotide|(Target-AID;-;@17;NGG;CGT:CAT;R:H;)	nucleotide mutations; create mode	GAACGCCGGCCCGAGCCCTTGGG	26:21290976-21290976+	T
26:21290976-21290976+|Target-AID|-|G:A|CGT:CAT|nucleotide|(Target-AID;-;@18;NG;CGT:CAT;R:H;)	nucleotide mutations; create mode	AACGCCGGCCCGAGCCCTTGGG	26:21290976-21290976+	T
26:21290976-21290976+|Target-AID|-|G:A|CGT:CAT|nucleotide|(Target-AID;-;@17;NG;CGT:CAT;R:H;)	nucleotide mutations; create mode	GAACGCCGGCCCGAGCCCTTGG	26:21290976-21290976+	T
10:53958812-53958812+|Target-AID|-|G:A|CGT:CAT|nucleotide|(Target-AID;-;@17;NG;CGT:CAT;R:H;)	nucleotide mutations; create mode	GGACGCAGCAGCACCCAATCAG	10:53958812-53958812+	T
14:2018459-2018459-|Target-AID|-|G:A|AGG:AAG|nucleotide|(Target-AID;-;@19;NG;AGG:AAG;R:K;)	nucleotide mutations; create mode	CCTGTCCAGGTCCTGCTTGCCG	14:2018459-2018459-	T
8:85876226-85876226+|Target-AID|-|G:A|CGA:CAA|nucleotide|(Target-AID;-;@18;NG;CGA:CAA;R:Q;)	nucleotide mutations; create mode	CTCGCAGGAGCCCTCGGCCCCG	8:85876226-85876226+	T
9:34160195-34160195-|Target-AID|-|G:A|AGA:AAA|nucleotide|(Target-AID;-;@18;NG;AGA:AAA;R:K;)	nucleotide mutations; create mode	ATCTTCATGGTTGAAATGTCTG	9:34160195-34160195-	T
15:22571145-22571145+|Target-AID|-|G:A|CGC:CAC|nucleotide|(Target-AID;-;@18;NGG;CGC:CAC;R:H;)	nucleotide mutations; create mode	AGCGTGTGACCCGCGCCGCCTGG	15:22571145-22571145+	T
15:22571145-22571145+|Target-AID|-|G:A|CGC:CAC|nucleotide|(Target-AID;-;@19;NG;CGC:CAC;R:H;)	nucleotide mutations; create mode	GCGTGTGACCCGCGCCGCCTGG	15:22571145-22571145+	T
15:22571145-22571145+|Target-AID|-|G:A|CGC:CAC|nucleotide|(Target-AID;-;@18;NG;CGC:CAC;R:H;)	nucleotide mutations; create mode	AGCGTGTGACCCGCGCCGCCTG	15:22571145-22571145+	T
18:14761160-14761160+|Target-AID|-|G:A|CGC:CAC|nucleotide|(Target-AID;-;@17;NG;CGC:CAC;R:H;)	nucleotide mutations; create mode	CTGCGGCACCGGCTGCAGCAAG	18:14761160-14761160+	T
1:83437765-83437765-|Target-AID|-|G:A|CGT:CAT|nucleotide|(Target-AID;-;@18;NG;CGT:CAT;R:H;)	nucleotide mutations; create mode	CACGTGATCATCTGGCTGTGGG	1:83437765-83437765-	T
5:27962135-27962135-|Target-AID|+|C:T|GCA:GTA|nucleotide|(Target-AID;+;@17;NG;GCA:GTA;A:V;)	nucleotide mutations; create mode	AGGCATTATTCCAAGATGGGGG	5:27962135-27962135-	T
5:27962135-27962135-|Target-AID|+|C:T|GCA:GTA|nucleotide|(Target-AID;+;@19;NG;GCA:GTA;A:V;)	nucleotide mutations; create mode	GCATTATTCCAAGATGGGGGTG	5:27962135-27962135-	T
19:34667935-34667935-|Target-AID|+|C:T|CCT:CTT|nucleotide|(Target-AID;+;@19;NG;CCT:CTT;P:L;)	nucleotide mutations; create mode	CCTGGGTGAACGGCCCATCTGG	19:34667935-34667935-	T
19:34667935-34667935-|Target-AID|+|C:T|CCT:CTT|nucleotide|(Target-AID;+;@19;NGG;CCT:CTT;P:L;)	nucleotide mutations; create mode	CCTGGGTGAACGGCCCATCTGGG	19:34667935-34667935-	T
11:93593130-93593130-|Target-AID|+|C:T|TCA:TTA|nucleotide|(Target-AID;+;@17;NG;TCA:TTA;S:L;)	nucleotide mutations; create mode	TGTCACTCAGAAATCTTTATTG	11:93593130-93593130-	T
3:117583973-117583973+|Target-AID|+|C:T|CCG:CTG|nucleotide|(Target-AID;+;@19;NG;CCG:CTG;P:L;)	nucleotide mutations; create mode	CCGGAGCTGGGCGGGGCGGGCG	3:117583973-117583973+	T
19:42260782-42260782-|Target-AID|+|C:T|GCC:GTC|nucleotide|(Target-AID;+;@17;NG;GCC:GTC;A:V;)	nucleotide mutations; create mode	CAGCCTATGGGGAGACTGAAGG	19:42260782-42260782-	T
4:114587269-114587269-|Target-AID|+|C:T|ACT:ATT|nucleotide|(Target-AID;+;@18;NG;ACT:ATT;T:I;)	nucleotide mutations; create mode	GACTGTCCGTGGGCACTGGAAG	4:114587269-114587269-	T
19:42945940-42945940-|Target-AID|+|C:T|ACT:ATT|nucleotide|(Target-AID;+;@19;NG;ACT:ATT;T:I;)	nucleotide mutations; create mode	ACTTCTTACACCCAGAATCTTG	19:42945940-42945940-	T
19:42945940-42945940-|Target-AID|+|C:T|ACT:ATT|nucleotide|(Target-AID;+;@19;NGG;ACT:ATT;T:I;)	nucleotide mutations; create mode	ACTTCTTACACCCAGAATCTTGG	19:42945940-42945940-	T
8:76668394-76668394-|Target-AID|+|C:T|ACT:ATT|nucleotide|(Target-AID;+;@18;NG;ACT:ATT;T:I;)	nucleotide mutations; create mode	AACTGTGTCAGCCGAGCCTCTG	8:76668394-76668394-	T
14:33074214-33074214+|Target-AID|+|C:T|TCT:TTT|nucleotide|(Target-AID;+;@19;NG;TCT:TTT;S:F;)	nucleotide mutations; create mode	TCTAGGTGTTATATTTTCTATG	14:33074214-33074214+	T
25:36528395-36528395-|Target-AID|+|C:T|GCT:GTT|nucleotide|(Target-AID;+;@18;NG;GCT:GTT;A:V;)	nucleotide mutations; create mode	AGCTCCCACCCAGGCAGGGGTG	25:36528395-36528395-	T
25:36528395-36528395-|Target-AID|+|C:T|GCT:GTT|nucleotide|(Target-AID;+;@18;NGG;GCT:GTT;A:V;)	nucleotide mutations; create mode	AGCTCCCACCCAGGCAGGGGTGG	25:36528395-36528395-	T
26:25893399-25893399+|Target-AID|+|C:T|GCG:GTG|nucleotide|(Target-AID;+;@18;NG;GCG:GTG;A:V;)	nucleotide mutations; create mode	TGCGTCTCCCGGGCAACAGCAG	26:25893399-25893399+	T
3:19060253-19060253+|Target-AID|+|C:T|CCG:CTG|nucleotide|(Target-AID;+;@19;NG;CCG:CTG;P:L;)	nucleotide mutations; create mode	CCGTGCCAGGCTTTCCTGGAAG	3:19060253-19060253+	T
8:105095507-105095507+|Target-AID|+|C:T|GCT:GTT|nucleotide|(Target-AID;+;@18;NG;GCT:GTT;A:V;)	nucleotide mutations; create mode	CGCTCTGAGCCGGCCTGGCGCG	8:105095507-105095507+	T
8:105095507-105095507+|Target-AID|+|C:T|GCT:GTT|nucleotide|(Target-AID;+;@18;NGG;GCT:GTT;A:V;)	nucleotide mutations; create mode	CGCTCTGAGCCGGCCTGGCGCGG	8:105095507-105095507+	T
2:136525437-136525437+|Target-AID|+|C:T|TCG:TTG|nucleotide|(Target-AID;+;@19;NG;TCG:TTG;S:L;)	nucleotide mutations; create mode	TCGGGCGGGCGGGAGGAAGCTG	2:136525437-136525437+	T
5:67994526-67994526-|Target-AID|+|C:T|CCA:CTA|nucleotide|(Target-AID;+;@19;NG;CCA:CTA;P:L;)	nucleotide mutations; create mode	CCATTTCCTTCTCCAATGCAGG	5:67994526-67994526-	T
10:26134742-26134742+|Target-AID|+|C:T|GCG:GTG|nucleotide|(Target-AID;+;@17;NG;GCG:GTG;A:V;)	nucleotide mutations; create mode	GGGCGGATCTGCGGGGAGCTGG	10:26134742-26134742+	T
10:26134742-26134742+|Target-AID|+|C:T|GCG:GTG|nucleotide|(Target-AID;+;@19;NG;GCG:GTG;A:V;)	nucleotide mutations; create mode	GCGGATCTGCGGGGAGCTGGCG	10:26134742-26134742+	T
10:26134742-26134742+|Target-AID|+|C:T|GCG:GTG|nucleotide|(Target-AID;+;@19;NGG;GCG:GTG;A:V;)	nucleotide mutations; create mode	GCGGATCTGCGGGGAGCTGGCGG	10:26134742-26134742+	T
10:7554165-7554165+|Target-AID|+|C:T|GCG:GTG|nucleotide|(Target-AID;+;@17;NG;GCG:GTG;A:V;)	nucleotide mutations; create mode	CTGCGCCCCGCGGGCGGTAGAG	10:7554165-7554165+	T
10:7554165-7554165+|Target-AID|+|C:T|GCG:GTG|nucleotide|(Target-AID;+;@18;NG;GCG:GTG;A:V;)	nucleotide mutations; create mode	TGCGCCCCGCGGGCGGTAGAGG	10:7554165-7554165+	T
10:7554165-7554165+|Target-AID|+|C:T|GCG:GTG|nucleotide|(Target-AID;+;@17;NGG;GCG:GTG;A:V;)	nucleotide mutations; create mode	CTGCGCCCCGCGGGCGGTAGAGG	10:7554165-7554165+	T
27:13295240-13295240+|Target-AID|+|C:T|GCG:GTG|nucleotide|(Target-AID;+;@18;NG;GCG:GTG;A:V;)	nucleotide mutations; create mode	CGCGCGCCGCAAAGCGTCCTGG	27:13295240-13295240+	T
27:13295240-13295240+|Target-AID|+|C:T|GCG:GTG|nucleotide|(Target-AID;+;@18;NGG;GCG:GTG;A:V;)	nucleotide mutations; create mode	CGCGCGCCGCAAAGCGTCCTGGG	27:13295240-13295240+	T
18:10694137-10694137-|Target-AID|+|C:T|TCA:TTA|nucleotide|(Target-AID;+;@19;NG;TCA:TTA;S:L;)	nucleotide mutations; create mode	TCAGCTGTTTTAGGTGGGTCTG	18:10694137-10694137-	T
21:19928526-19928526-|Target-AID|+|C:T|GCA:GTA|nucleotide|(Target-AID;+;@19;NG;GCA:GTA;A:V;)	nucleotide mutations; create mode	GCAGACCCAGCAGCGCCTGCTG	21:19928526-19928526-	T
21:19928526-19928526-|Target-AID|+|C:T|GCA:GTA|nucleotide|(Target-AID;+;@19;NGG;GCA:GTA;A:V;)	nucleotide mutations; create mode	GCAGACCCAGCAGCGCCTGCTGG	21:19928526-19928526-	T
7:8270606-8270606-|ABE|+|A:G|GAT:GGT|nucleotide|(ABE;+;@17;NG;GAT:GGT;D:G;)	nucleotide mutations; create mode	CTGATGCTTTATGGTTTACAAG	7:8270606-8270606-	G
7:8270606-8270606-|ABE|+|A:G|GAT:GGT|nucleotide|(ABE;+;@17;NGG;GAT:GGT;D:G;)	nucleotide mutations; create mode	CTGATGCTTTATGGTTTACAAGG	7:8270606-8270606-	G
11:9253134-9253134-|ABE|+|A:G|CAA:CGA|nucleotide|(ABE;+;@13;NG;CAA:CGA;Q:R;)	nucleotide mutations; create mode	GGGCTGCAAGCAAGATGACATG	11:9253134-9253134-	G
11:9253134-9253134-|ABE|+|A:G|CAA:CGA|nucleotide|(ABE;+;@13;NGG;CAA:CGA;Q:R;)	nucleotide mutations; create mode	GGGCTGCAAGCAAGATGACATGG	11:9253134-9253134-	G
28:26503996-26503996-|ABE|+|A:G|TAG:TGG|nucleotide|(ABE;+;@15;NG;TAG:TGG;*:W;)	nucleotide mutations; create mode	AGAGTAGTTACAGATATTATAG	28:26503996-26503996-	G
28:26503996-26503996-|ABE|+|A:G|TAG:TGG|nucleotide|(ABE;+;@16;NG;TAG:TGG;*:W;)	nucleotide mutations; create mode	GAGTAGTTACAGATATTATAGG	28:26503996-26503996-	G
28:26503996-26503996-|ABE|+|A:G|TAG:TGG|nucleotide|(ABE;+;@15;NGG;TAG:TGG;*:W;)	nucleotide mutations; create mode	AGAGTAGTTACAGATATTATAGG	28:26503996-26503996-	G
28:26503996-26503996-|ABE|+|A:G|TAG:TGG|nucleotide|(ABE;+;@16;NGG;TAG:TGG;*:W;)	nucleotide mutations; create mode	GAGTAGTTACAGATATTATAGGG	28:26503996-26503996-	G
1:81127191-81127191-|ABE|+|A:G|TAG:TGG|nucleotide|(ABE;+;@16;NG;TAG:TGG;*:W;)	nucleotide mutations; create mode	GGATAGGGCAAAATGTGGGTAG	1:81127191-81127191-	G
1:81127191-81127191-|ABE|+|A:G|TAG:TGG|nucleotide|(ABE;+;@17;NG;TAG:TGG;*:W;)	nucleotide mutations; create mode	GATAGGGCAAAATGTGGGTAGG	1:81127191-81127191-	G
1:81127191-81127191-|ABE|+|A:G|TAG:TGG|nucleotide|(ABE;+;@16;NGG;TAG:TGG;*:W;)	nucleotide mutations; create mode	GGATAGGGCAAAATGTGGGTAGG	1:81127191-81127191-	G
6:86917881-86917881-|ABE|+|A:G|TAA:TGA|nucleotide|(ABE;+;@13;NG;TAA:TGA;*:*;)	nucleotide mutations; create mode	ACCTTTTAATAGACTATTCCTG	6:86917881-86917881-	G
2:126134851-126134851-|ABE|+|A:G|CAG:CGG|nucleotide|(ABE;+;@14;NG;CAG:CGG;Q:R;)	nucleotide mutations; create mode	AATTTCAGTTCATCCTTTAGTG	2:126134851-126134851-	G
13:43187369-43187369-|ABE|+|A:G|TAT:TGT|nucleotide|(ABE;+;@14;NG;TAT:TGT;Y:C;)	nucleotide mutations; create mode	GGCTCTATAAGGCCAAGGATTG	13:43187369-43187369-	G
20:71235391-71235391+|ABE|+|A:G|GAC:GGC|nucleotide|(ABE;+;@13;NG;GAC:GGC;D:G;)	nucleotide mutations; create mode	GCCCCCGACGCAGGCGCGTGCG	20:71235391-71235391+	G
20:71235391-71235391+|ABE|+|A:G|GAC:GGC|nucleotide|(ABE;+;@15;NG;GAC:GGC;D:G;)	nucleotide mutations; create mode	CCCCGACGCAGGCGCGTGCGCG	20:71235391-71235391+	G
15:34577388-34577388+|ABE|+|A:G|GAG:GGG|nucleotide|(ABE;+;@14;NG;GAG:GGG;E:G;)	nucleotide mutations; create mode	GCGGCGAGCGTTTCCTAACGTG	15:34577388-34577388+	G
15:34577388-34577388+|ABE|+|A:G|GAG:GGG|nucleotide|(ABE;+;@16;NG;GAG:GGG;E:G;)	nucleotide mutations; create mode	GGCGAGCGTTTCCTAACGTGAG	15:34577388-34577388+	G
3:9859845-9859845+|ABE|+|A:G|GAT:GGT|nucleotide|(ABE;+;@13;NG;GAT:GGT;D:G;)	nucleotide mutations; create mode	TGACCTGATCAGAAGGATTGAG	3:9859845-9859845+	G
3:9859845-9859845+|ABE|+|A:G|GAT:GGT|nucleotide|(ABE;+;@14;NG;GAT:GGT;D:G;)	nucleotide mutations; create mode	GACCTGATCAGAAGGATTGAGG	3:9859845-9859845+	G
3:9859845-9859845+|ABE|+|A:G|GAT:GGT|nucleotide|(ABE;+;@15;NG;GAT:GGT;D:G;)	nucleotide mutations; create mode	ACCTGATCAGAAGGATTGAGGG	3:9859845-9859845+	G
3:9859845-9859845+|ABE|+|A:G|GAT:GGT|nucleotide|(ABE;+;@13;NGG;GAT:GGT;D:G;)	nucleotide mutations; create mode	TGACCTGATCAGAAGGATTGAGG	3:9859845-9859845+	G
3:9859845-9859845+|ABE|+|A:G|GAT:GGT|nucleotide|(ABE;+;@14;NGG;GAT:GGT;D:G;)	nucleotide mutations; create mode	GACCTGATCAGAAGGATTGAGGG	3:9859845-9859845+	G
3:9859845-9859845+|ABE|+|A:G|GAT:GGT|nucleotide|(ABE;+;@15;NGG;GAT:GGT;D:G;)	nucleotide mutations; create mode	ACCTGATCAGAAGGATTGAGGGG	3:9859845-9859845+	G
13:75122186-75122186-|ABE|-|T:C|ATG:ACG|nucleotide|(ABE;-;@14;NG;ATG:ACG;M:T;)	nucleotide mutations; create mode	ATCTTCATTCCCTTTAATGCTG	13:75122186-75122186-	G
19:40528217-40528217+|ABE|-|T:C|GTA:GCA|nucleotide|(ABE;-;@14;NGG;GTA:GCA;V:A;)	nucleotide mutations; create mode	GCCCCTACAAGGGGGTGGGGAGG	19:40528217-40528217+	G
19:40528217-40528217+|ABE|-|T:C|GTA:GCA|nucleotide|(ABE;-;@14;NG;GTA:GCA;V:A;)	nucleotide mutations; create mode	GCCCCTACAAGGGGGTGGGGAG	19:40528217-40528217+	G
19:28443398-28443398-|ABE|-|T:C|CTG:CCG|nucleotide|(ABE;-;@13;NG;CTG:CCG;L:P;)	nucleotide mutations; create mode	CACTCCCAGCACCAGCCCCAAG	19:28443398-28443398-	G
13:66204571-66204571+|ABE|-|T:C|CTG:CCG|nucleotide|(ABE;-;@15;NG;CTG:CCG;L:P;)	nucleotide mutations; create mode	GCATCAGCTGGATTTGGAGGAG	13:66204571-66204571+	G
18:36458039-36458039-|ABE|-|T:C|ATA:ACA|nucleotide|(ABE;-;@16;NG;ATA:ACA;I:T;)	nucleotide mutations; create mode	TATTATCTGAGAGGTCATGGAG	18:36458039-36458039-	G
4:70049546-70049546-|ABE|-|T:C|ATA:ACA|nucleotide|(ABE;-;@16;NG;ATA:ACA;I:T;)	nucleotide mutations; create mode	AATTATCCATTAAAAATTACTG	4:70049546-70049546-	G
7:2586001-2586001-|ABE|-|T:C|GTG:GCG|nucleotide|(ABE;-;@14;NG;GTG:GCG;V:A;)	nucleotide mutations; create mode	GCAGGCACATAGCCCAGGACAG	7:2586001-2586001-	G
27:33042349-33042349-|ABE|-|T:C|GTG:GCG|nucleotide|(ABE;-;@13;NGG;GTG:GCG;V:A;)	nucleotide mutations; create mode	AAATTCCACGTGTGTGTGTGTGG	27:33042349-33042349-	G
27:33042349-33042349-|ABE|-|T:C|GTG:GCG|nucleotide|(ABE;-;@14;NG;GTG:GCG;V:A;)	nucleotide mutations; create mode	AATTCCACGTGTGTGTGTGTGG	27:33042349-33042349-	G
27:33042349-33042349-|ABE|-|T:C|GTG:GCG|nucleotide|(ABE;-;@13;NG;GTG:GCG;V:A;)	nucleotide mutations; create mode	AAATTCCACGTGTGTGTGTGTG	27:33042349-33042349-	G
7:19833264-19833264-|ABE|-|T:C|GTG:GCG|nucleotide|(ABE;-;@15;NG;GTG:GCG;V:A;)	nucleotide mutations; create mode	CCACCACCACCTCACCTGGATG	7:19833264-19833264-	G
13:59144494-59144494-|ABE|-|T:C|GTG:GCG|nucleotide|(ABE;-;@13;NGG;GTG:GCG;V:A;)	nucleotide mutations; create mode	TGGTCCCACGTTCTTTGGAAGGG	13:59144494-59144494-	G
13:59144494-59144494-|ABE|-|T:C|GTG:GCG|nucleotide|(ABE;-;@14;NG;GTG:GCG;V:A;)	nucleotide mutations; create mode	GGTCCCACGTTCTTTGGAAGGG	13:59144494-59144494-	G
13:59144494-59144494-|ABE|-|T:C|GTG:GCG|nucleotide|(ABE;-;@13;NG;GTG:GCG;V:A;)	nucleotide mutations; create mode	TGGTCCCACGTTCTTTGGAAGG	13:59144494-59144494-	G
6:69355662-69355662+|ABE|-|T:C|ATG:ACG|nucleotide|(ABE;-;@15;NGG;ATG:ACG;M:T;)	nucleotide mutations; create mode	AGCTCATTCCCTCATTTCACAGG	6:69355662-69355662+	G
6:69355662-69355662+|ABE|-|T:C|ATG:ACG|nucleotide|(ABE;-;@16;NG;ATG:ACG;M:T;)	nucleotide mutations; create mode	GCTCATTCCCTCATTTCACAGG	6:69355662-69355662+	G
6:69355662-69355662+|ABE|-|T:C|ATG:ACG|nucleotide|(ABE;-;@15;NG;ATG:ACG;M:T;)	nucleotide mutations; create mode	AGCTCATTCCCTCATTTCACAG	6:69355662-69355662+	G
11:7422051-7422051-|ABE|-|T:C|ATG:ACG|nucleotide|(ABE;-;@15;NG;ATG:ACG;M:T;)	nucleotide mutations; create mode	AAGTCATTTCTCTTCACCATCG	11:7422051-7422051-	G
7:19835942-19835942-|ABE|-|T:C|ATG:ACG|nucleotide|(ABE;-;@16;NG;ATG:ACG;M:T;)	nucleotide mutations; create mode	CTCCATCTGTGAAATGAAGTTG	7:19835942-19835942-	G
7:19835942-19835942-|ABE|-|T:C|ATG:ACG|nucleotide|(ABE;-;@13;NG;ATG:ACG;M:T;)	nucleotide mutations; create mode	TTTCTCCATCTGTGAAATGAAG	7:19835942-19835942-	G
19:44742051-44742051+|ABE|-|T:C|CTC:CCC|nucleotide|(ABE;-;@16;NGG;CTC:CCC;L:P;)	nucleotide mutations; create mode	CTCGAGCCCCGCCCCCCGGCAGG	19:44742051-44742051+	G
19:44742051-44742051+|ABE|-|T:C|CTC:CCC|nucleotide|(ABE;-;@17;NG;CTC:CCC;L:P;)	nucleotide mutations; create mode	TCGAGCCCCGCCCCCCGGCAGG	19:44742051-44742051+	G
19:44742051-44742051+|ABE|-|T:C|CTC:CCC|nucleotide|(ABE;-;@16;NG;CTC:CCC;L:P;)	nucleotide mutations; create mode	CTCGAGCCCCGCCCCCCGGCAG	19:44742051-44742051+	G
19:44742051-44742051+|ABE|-|T:C|CTC:CCC|nucleotide|(ABE;-;@13;NG;CTC:CCC;L:P;)	nucleotide mutations; create mode	GCCCTCGAGCCCCGCCCCCCGG	19:44742051-44742051+	G
7:22684332-22684332-|ABE|-|T:C|CTC:CCC|nucleotide|(ABE;-;@17;NGG;CTC:CCC;L:P;)	nucleotide mutations; create mode	GGGAGGGCCTCGCTTCCCTCAGG	7:22684332-22684332-	G
7:22684332-22684332-|ABE|-|T:C|CTC:CCC|nucleotide|(ABE;-;@17;NG;CTC:CCC;L:P;)	nucleotide mutations; create mode	GGGAGGGCCTCGCTTCCCTCAG	7:22684332-22684332-	G
9:61291341-61291341+|ABE|-|T:C|GTA:GCA|nucleotide|(ABE;-;@16;NGG;GTA:GCA;V:A;)	nucleotide mutations; create mode	AACTACGTCTCCAGTGAAAGCGG	9:61291341-61291341+	G
9:61291341-61291341+|ABE|-|T:C|GTA:GCA|nucleotide|(ABE;-;@17;NG;GTA:GCA;V:A;)	nucleotide mutations; create mode	ACTACGTCTCCAGTGAAAGCGG	9:61291341-61291341+	G
9:61291341-61291341+|ABE|-|T:C|GTA:GCA|nucleotide|(ABE;-;@16;NG;GTA:GCA;V:A;)	nucleotide mutations; create mode	AACTACGTCTCCAGTGAAAGCG	9:61291341-61291341+	G
2:14953896-14953896+|ABE|-|T:C|CTA:CCA|nucleotide|(ABE;-;@13;NG;CTA:CCA;L:P;)	nucleotide mutations; create mode	TAGTCCTAGAGAAATGCATATG	2:14953896-14953896+	G
18:51679184-51679184-|ABE|-|T:C|GTC:GCC|nucleotide|(ABE;-;@14;NGG;GTC:GCC;V:A;)	nucleotide mutations; create mode	GAGTGGACAGGGGCTGGGGGAGG	18:51679184-51679184-	G
18:51679184-51679184-|ABE|-|T:C|GTC:GCC|nucleotide|(ABE;-;@14;NG;GTC:GCC;V:A;)	nucleotide mutations; create mode	GAGTGGACAGGGGCTGGGGGAG	18:51679184-51679184-	G
1:86953345-86953345+|ABE|-|T:C|TTG:TCG|nucleotide|(ABE;-;@13;NG;TTG:TCG;L:S;)	nucleotide mutations; create mode	AAATCGCAAAGCTCCGGAGAAG	1:86953345-86953345+	G
19:27915313-27915313+|ABE|+|A:G|TAC:TGC|nucleotide|(ABE;+;@17;NG;TAC:TGC;Y:C;)	nucleotide mutations; remove mode	GTTGCTGAGAGGCGGCAGGCGG	19:27915313-27915313+	G
19:27915313-27915313+|ABE|+|A:G|TAC:TGC|nucleotide|(ABE;+;@17;NGG;TAC:TGC;Y:C;)	nucleotide mutations; remove mode	GTTGCTGAGAGGCGGCAGGCGGG	19:27915313-27915313+	G
17:65678354-65678354+|ABE|+|A:G|AAT:AGT|nucleotide|(ABE;+;@14;NG;AAT:AGT;N:S;)	nucleotide mutations; remove mode	GCAGCAGTGCTGTTTGCCCACG	17:65678354-65678354+	G
17:65678354-65678354+|ABE|+|A:G|AAT:AGT|nucleotide|(ABE;+;@16;NG;AAT:AGT;N:S;)	nucleotide mutations; remove mode	AGCAGTGCTGTTTGCCCACGTG	17:65678354-65678354+	G
17:65678354-65678354+|ABE|+|A:G|AAT:AGT|nucleotide|(ABE;+;@16;NGG;AAT:AGT;N:S;)	nucleotide mutations; remove mode	AGCAGTGCTGTTTGCCCACGTGG	17:65678354-65678354+	G
1:144790231-144790231-|ABE|+|A:G|AAT:AGT|nucleotide|(ABE;+;@16;NG;AAT:AGT;N:S;)	nucleotide mutations; remove mode	GTCAGTCCTATCCGACTCTTTG	1:144790231-144790231-	G
19:51585509-51585509+|ABE|+|A:G|GAG:GGG|nucleotide|(ABE;+;@17;NG;GAG:GGG;E:G;)	nucleotide mutations; remove mode	TTGGGGCAACGCGCGGGCGGGG	19:51585509-51585509+	G
29:29178288-29178288+|ABE|+|A:G|GAG:GGG|nucleotide|(ABE;+;@17;NG;GAG:GGG;E:G;)	nucleotide mutations; remove mode	CTGGGTACACATCCAGTGGCTG	29:29178288-29178288+	G
29:29178288-29178288+|ABE|+|A:G|GAG:GGG|nucleotide|(ABE;+;@17;NGG;GAG:GGG;E:G;)	nucleotide mutations; remove mode	CTGGGTACACATCCAGTGGCTGG	29:29178288-29178288+	G
13:12293911-12293911-|ABE|+|A:G|GAG:GGG|nucleotide|(ABE;+;@13;NG;GAG:GGG;E:G;)	nucleotide mutations; remove mode	GAACAGGGGAAGACCCCAACAG	13:12293911-12293911-	G
25:41940812-41940812+|ABE|+|A:G|GAA:GGA|nucleotide|(ABE;+;@16;NG;GAA:GGA;E:G;)	nucleotide mutations; remove mode	GCGGGAGCCGGAAGTCCCGCAG	25:41940812-41940812+	G
25:41940812-41940812+|ABE|+|A:G|GAA:GGA|nucleotide|(ABE;+;@17;NG;GAA:GGA;E:G;)	nucleotide mutations; remove mode	CGGGAGCCGGAAGTCCCGCAGG	25:41940812-41940812+	G
25:41940812-41940812+|ABE|+|A:G|GAA:GGA|nucleotide|(ABE;+;@16;NGG;GAA:GGA;E:G;)	nucleotide mutations; remove mode	GCGGGAGCCGGAAGTCCCGCAGG	25:41940812-41940812+	G
3:19834917-19834917+|ABE|+|A:G|GAA:GGA|nucleotide|(ABE;+;@13;NG;GAA:GGA;E:G;)	nucleotide mutations; remove mode	GCGGGAGGAGGAGGAAGGAGGG	3:19834917-19834917+	G
3:19834917-19834917+|ABE|+|A:G|GAA:GGA|nucleotide|(ABE;+;@16;NG;GAA:GGA;E:G;)	nucleotide mutations; remove mode	GGAGGAGGAGGAAGGAGGGAGG	3:19834917-19834917+	G
3:19834917-19834917+|ABE|+|A:G|GAA:GGA|nucleotide|(ABE;+;@16;NGG;GAA:GGA;E:G;)	nucleotide mutations; remove mode	GGAGGAGGAGGAAGGAGGGAGGG	3:19834917-19834917+	G
3:15658731-15658731-|ABE|+|A:G|GAA:GGA|nucleotide|(ABE;+;@15;NG;GAA:GGA;E:G;)	nucleotide mutations; remove mode	AGGGGGATGTGGGGGAGAGCAG	3:15658731-15658731-	G
3:15658731-15658731-|ABE|+|A:G|GAA:GGA|nucleotide|(ABE;+;@16;NG;GAA:GGA;E:G;)	nucleotide mutations; remove mode	GGGGGATGTGGGGGAGAGCAGG	3:15658731-15658731-	G
3:15658731-15658731-|ABE|+|A:G|GAA:GGA|nucleotide|(ABE;+;@15;NGG;GAA:GGA;E:G;)	nucleotide mutations; remove mode	AGGGGGATGTGGGGGAGAGCAGG	3:15658731-15658731-	G
16:33913863-33913863+|ABE|+|A:G|GAA:GGA|nucleotide|(ABE;+;@16;NG;GAA:GGA;E:G;)	nucleotide mutations; remove mode	AAAGGAGCACAGCTGGAGGTAG	16:33913863-33913863+	G
29:40931552-40931552+|ABE|+|A:G|TAA:TGA|nucleotide|(ABE;+;@15;NG;TAA:TGA;*:*;)	nucleotide mutations; remove mode	GCCGTGAGAGAAGCTGGCCGAG	29:40931552-40931552+	G
29:40931552-40931552+|ABE|+|A:G|TAA:TGA|nucleotide|(ABE;+;@15;NGG;TAA:TGA;*:*;)	nucleotide mutations; remove mode	GCCGTGAGAGAAGCTGGCCGAGG	29:40931552-40931552+	G
8:73698876-73698876-|ABE|+|A:G|TAA:TGA|nucleotide|(ABE;+;@15;NG;TAA:TGA;*:*;)	nucleotide mutations; remove mode	TTTGTGACCCTATGGACTGTAG	8:73698876-73698876-	G
16:52158365-52158365+|ABE|+|A:G|TAA:TGA|nucleotide|(ABE;+;@13;NG;TAA:TGA;*:*;)	nucleotide mutations; remove mode	TTAGACTGATCAGGGCGCTGAG	16:52158365-52158365+	G
14:65584387-65584387+|ABE|+|A:G|TAA:TGA|nucleotide|(ABE;+;@14;NG;TAA:TGA;*:*;)	nucleotide mutations; remove mode	GCGTTTGACGTCATCGTGCGTG	14:65584387-65584387+	G
14:65584387-65584387+|ABE|+|A:G|TAA:TGA|nucleotide|(ABE;+;@16;NG;TAA:TGA;*:*;)	nucleotide mutations; remove mode	GTTTGACGTCATCGTGCGTGTG	14:65584387-65584387+	G
14:65584387-65584387+|ABE|+|A:G|TAA:TGA|nucleotide|(ABE;+;@17;NG;TAA:TGA;*:*;)	nucleotide mutations; remove mode	TTTGACGTCATCGTGCGTGTGG	14:65584387-65584387+	G
14:65584387-65584387+|ABE|+|A:G|TAA:TGA|nucleotide|(ABE;+;@16;NGG;TAA:TGA;*:*;)	nucleotide mutations; remove mode	GTTTGACGTCATCGTGCGTGTGG	14:65584387-65584387+	G
21:34314401-34314401-|ABE|+|A:G|TAT:TGT|nucleotide|(ABE;+;@17;NG;TAT:TGT;Y:C;)	nucleotide mutations; remove mode	AATGTGATATATAATGTGATTG	21:34314401-34314401-	G
25:664958-664958-|ABE|+|A:G|AAG:AGG|nucleotide|(ABE;+;@17;NG;AAG:AGG;K:R;)	nucleotide mutations; remove mode	GCAGGAGCCTGGATGGACCCTG	25:664958-664958-	G
14:2018459-2018459-|ABE|+|A:G|AAG:AGG|nucleotide|(ABE;+;@15;NG;AAG:AGG;K:R;)	nucleotide mutations; remove mode	GGACAGGCAGGAGCCGGACAGG	14:2018459-2018459-	G
22:50610562-50610562+|ABE|+|A:G|CAC:CGC|nucleotide|(ABE;+;@16;NG;CAC:CGC;H:R;)	nucleotide mutations; remove mode	GGCCGCATGGATGCGGTCTGAG	22:50610562-50610562+	G
17:46273672-46273672-|ABE|+|A:G|GAA:GGA|nucleotide|(ABE;+;@14;NG;GAA:GGA;E:G;)	nucleotide mutations; remove mode	TCAGGGGACGTGGGGATGGCTG	17:46273672-46273672-	G
17:46273672-46273672-|ABE|+|A:G|GAA:GGA|nucleotide|(ABE;+;@17;NG;GAA:GGA;E:G;)	nucleotide mutations; remove mode	GGGGACGTGGGGATGGCTGTTG	17:46273672-46273672-	G
17:46273672-46273672-|ABE|+|A:G|GAA:GGA|nucleotide|(ABE;+;@17;NGG;GAA:GGA;E:G;)	nucleotide mutations; remove mode	GGGGACGTGGGGATGGCTGTTGG	17:46273672-46273672-	G
26:15012862-15012862-|ABE|+|A:G|TAG:TGG|nucleotide|(ABE;+;@13;NG;TAG:TGG;*:W;)	nucleotide mutations; remove mode	CAAGGATGGACCTAGTACACTG	26:15012862-15012862-	G
18:47656664-47656664+|ABE|+|A:G|TAT:TGT|nucleotide|(ABE;+;@15;NG;TAT:TGT;Y:C;)	nucleotide mutations; remove mode	ATTGTGTATGCTGCAAGGAAAG	18:47656664-47656664+	G
15:62935566-62935566+|ABE|+|A:G|CAG:CGG|nucleotide|(ABE;+;@17;NG;CAG:CGG;Q:R;)	nucleotide mutations; remove mode	GGCGGAGCGGCGCTTCCGATCG	15:62935566-62935566+	G
15:62935566-62935566+|ABE|+|A:G|CAG:CGG|nucleotide|(ABE;+;@17;NGG;CAG:CGG;Q:R;)	nucleotide mutations; remove mode	GGCGGAGCGGCGCTTCCGATCGG	15:62935566-62935566+	G
11:10171597-10171597+|ABE|+|A:G|AAG:AGG|nucleotide|(ABE;+;@14;NG;AAG:AGG;K:R;)	nucleotide mutations; remove mode	GGTGGAGGGAGAGAGTGCCGCG	11:10171597-10171597+	G
7:70823935-70823935-|ABE|+|A:G|AAG:AGG|nucleotide|(ABE;+;@14;NG;AAG:AGG;K:R;)	nucleotide mutations; remove mode	GGAGTAGGACTAGATGGTCTTG	7:70823935-70823935-	G
X:39677497-39677497+|ABE|-|T:C|CTT:CCT|nucleotide|(ABE;-;@14;NG;CTT:CCT;L:P;)	nucleotide mutations; remove mode	TAGCCAGGGGGGCCAAGTGCAG	X:39677497-39677497+	G
3:120809587-120809587-|ABE|-|T:C|CTT:CCT|nucleotide|(ABE;-;@16;NG;CTT:CCT;L:P;)	nucleotide mutations; remove mode	AGCAGGTTCCCCCACGGGTCAG	3:120809587-120809587-	G
11:93593130-93593130-|ABE|-|T:C|TTA:TCA|nucleotide|(ABE;-;@13;NG;TTA:TCA;L:S;)	nucleotide mutations; remove mode	TCTGAGTGACAGCTAAGAAAGG	11:93593130-93593130-	G
8:11480018-11480018-|ABE|-|T:C|CTG:CCG|nucleotide|(ABE;-;@17;NG;CTG:CCG;L:P;)	nucleotide mutations; remove mode	TTCGGACTTCAGGAACCTGCAG	8:11480018-11480018-	G
28:13562893-13562893+|ABE|-|T:C|CTG:CCG|nucleotide|(ABE;-;@16;NG;CTG:CCG;L:P;)	nucleotide mutations; remove mode	GTGCGGGAGTAAGGGCGGGGCG	28:13562893-13562893+	G
19:42260782-42260782-|ABE|-|T:C|GTC:GCC|nucleotide|(ABE;-;@17;NG;GTC:GCC;V:A;)	nucleotide mutations; remove mode	TAGGCTGACTGGGGCAGAAAGG	19:42260782-42260782-	G
25:2102673-2102673+|ABE|-|T:C|GTC:GCC|nucleotide|(ABE;-;@15;NGG;GTC:GCC;V:A;)	nucleotide mutations; remove mode	GAGAGGCGGAAGTTCCGGCCCGG	25:2102673-2102673+	G
25:2102673-2102673+|ABE|-|T:C|GTC:GCC|nucleotide|(ABE;-;@15;NG;GTC:GCC;V:A;)	nucleotide mutations; remove mode	GAGAGGCGGAAGTTCCGGCCCG	25:2102673-2102673+	G
23:27407511-27407511+|ABE|-|T:C|CTC:CCC|nucleotide|(ABE;-;@17;NGG;CTC:CCC;L:P;)	nucleotide mutations; remove mode	AGGGGCTAAGCAGGACCCAGTGG	23:27407511-27407511+	G
23:27407511-27407511+|ABE|-|T:C|CTC:CCC|nucleotide|(ABE;-;@17;NG;CTC:CCC;L:P;)	nucleotide mutations; remove mode	AGGGGCTAAGCAGGACCCAGTG	23:27407511-27407511+	G
1:44947609-44947609-|ABE|-|T:C|CTC:CCC|nucleotide|(ABE;-;@17;NGG;CTC:CCC;L:P;)	nucleotide mutations; remove mode	TGGGGGAGAAACGTCCAGGGAGG	1:44947609-44947609-	G
1:44947609-44947609-|ABE|-|T:C|CTC:CCC|nucleotide|(ABE;-;@17;NG;CTC:CCC;L:P;)	nucleotide mutations; remove mode	TGGGGGAGAAACGTCCAGGGAG	1:44947609-44947609-	G
25:41983596-41983596+|ABE|-|T:C|CTA:CCA|nucleotide|(ABE;-;@13;NGG;CTA:CCA;L:P;)	nucleotide mutations; remove mode	CCAATCTGGGACTGCGGCCCGGG	25:41983596-41983596+	G
25:41983596-41983596+|ABE|-|T:C|CTA:CCA|nucleotide|(ABE;-;@17;NG;CTA:CCA;L:P;)	nucleotide mutations; remove mode	TCTGGGACTGCGGCCCGGGGCG	25:41983596-41983596+	G
25:41983596-41983596+|ABE|-|T:C|CTA:CCA|nucleotide|(ABE;-;@13;NG;CTA:CCA;L:P;)	nucleotide mutations; remove mode	CCAATCTGGGACTGCGGCCCGG	25:41983596-41983596+	G
25:36528395-36528395-|ABE|-|T:C|GTT:GCT|nucleotide|(ABE;-;@13;NGG;GTT:GCT;V:A;)	nucleotide mutations; remove mode	GGTGGGAGCTGGAGGAGGAAGGG	25:36528395-36528395-	G
25:36528395-36528395-|ABE|-|T:C|GTT:GCT|nucleotide|(ABE;-;@14;NG;GTT:GCT;V:A;)	nucleotide mutations; remove mode	GTGGGAGCTGGAGGAGGAAGGG	25:36528395-36528395-	G
25:36528395-36528395-|ABE|-|T:C|GTT:GCT|nucleotide|(ABE;-;@13;NG;GTT:GCT;V:A;)	nucleotide mutations; remove mode	GGTGGGAGCTGGAGGAGGAAGG	25:36528395-36528395-	G
23:17867443-17867443+|ABE|-|T:C|GTG:GCG|nucleotide|(ABE;-;@15;NG;GTG:GCG;V:A;)	nucleotide mutations; remove mode	GCCGCGCACCTGCCGCCGCCCG	23:17867443-17867443+	G
26:25893399-25893399+|ABE|-|T:C|GTG:GCG|nucleotide|(ABE;-;@14;NGG;GTG:GCG;V:A;)	nucleotide mutations; remove mode	GGAGACGCAGGCTGGGGGAGGGG	26:25893399-25893399+	G
26:25893399-25893399+|ABE|-|T:C|GTG:GCG|nucleotide|(ABE;-;@16;NG;GTG:GCG;V:A;)	nucleotide mutations; remove mode	AGACGCAGGCTGGGGGAGGGGG	26:25893399-25893399+	G
26:25893399-25893399+|ABE|-|T:C|GTG:GCG|nucleotide|(ABE;-;@14;NG;GTG:GCG;V:A;)	nucleotide mutations; remove mode	GGAGACGCAGGCTGGGGGAGGG	26:25893399-25893399+	G
3:19060253-19060253+|ABE|-|T:C|CTG:CCG|nucleotide|(ABE;-;@17;NGG;CTG:CCG;L:P;)	nucleotide mutations; remove mode	CACGGATTAAGCTGCGATTTGGG	3:19060253-19060253+	G
3:19060253-19060253+|ABE|-|T:C|CTG:CCG|nucleotide|(ABE;-;@16;NGG;CTG:CCG;L:P;)	nucleotide mutations; remove mode	GCACGGATTAAGCTGCGATTTGG	3:19060253-19060253+	G
3:19060253-19060253+|ABE|-|T:C|CTG:CCG|nucleotide|(ABE;-;@17;NG;CTG:CCG;L:P;)	nucleotide mutations; remove mode	CACGGATTAAGCTGCGATTTGG	3:19060253-19060253+	G
3:19060253-19060253+|ABE|-|T:C|CTG:CCG|nucleotide|(ABE;-;@16;NG;CTG:CCG;L:P;)	nucleotide mutations; remove mode	GCACGGATTAAGCTGCGATTTG	3:19060253-19060253+	G
15:62869497-62869497-|ABE|-|T:C|GTT:GCT|nucleotide|(ABE;-;@14;NG;GTT:GCT;V:A;)	nucleotide mutations; remove mode	CTTCTAGCCAGCTGAATTCTTG	15:62869497-62869497-	G
2:136525437-136525437+|ABE|-|T:C|TTG:TCG|nucleotide|(ABE;-;@14;NG;TTG:TCG;L:S;)	nucleotide mutations; remove mode	CCGCCCGAGAGCTCAATGCGGG	2:136525437-136525437+	G
10:11495034-11495034-|ABE|-|T:C|TTC:TCC|nucleotide|(ABE;-;@16;NG;TTC:TCC;F:S;)	nucleotide mutations; remove mode	TCAGGATGTACGGAGGCCATCG	10:11495034-11495034-	G
14:1487266-1487266+|ABE|-|T:C|TTC:TCC|nucleotide|(ABE;-;@16;NG;TTC:TCC;F:S;)	nucleotide mutations; remove mode	CTCGGAGCACCGTCTGGACGAG	14:1487266-1487266+	G
14:1487266-1487266+|ABE|-|T:C|TTC:TCC|nucleotide|(ABE;-;@14;NG;TTC:TCC;F:S;)	nucleotide mutations; remove mode	CGCTCGGAGCACCGTCTGGACG	14:1487266-1487266+	G
15:35500265-35500265+|ABE|-|T:C|TTC:TCC|nucleotide|(ABE;-;@15;NGG;TTC:TCC;F:S;)	nucleotide mutations; remove mode	CTGGGGAGGACGGGGCGGGGCGG	15:35500265-35500265+	G
15:35500265-35500265+|ABE|-|T:C|TTC:TCC|nucleotide|(ABE;-;@16;NG;TTC:TCC;F:S;)	nucleotide mutations; remove mode	TGGGGAGGACGGGGCGGGGCGG	15:35500265-35500265+	G
15:35500265-35500265+|ABE|-|T:C|TTC:TCC|nucleotide|(ABE;-;@15;NG;TTC:TCC;F:S;)	nucleotide mutations; remove mode	CTGGGGAGGACGGGGCGGGGCG	15:35500265-35500265+	G
X:64684114-64684114-|ABE|-|T:C|ATC:ACC|nucleotide|(ABE;-;@14;NGG;ATC:ACC;I:T;)	nucleotide mutations; remove mode	TTGATGGTGGTGTTGACTGATGG	X:64684114-64684114-	G
X:64684114-64684114-|ABE|-|T:C|ATC:ACC|nucleotide|(ABE;-;@14;NG;ATC:ACC;I:T;)	nucleotide mutations; remove mode	TTGATGGTGGTGTTGACTGATG	X:64684114-64684114-	G
2:1850007-1850007+|ABE|-|T:C|CTC:CCC|nucleotide|(ABE;-;@14;NGG;CTC:CCC;L:P;)	nucleotide mutations; remove mode	CGCAGGGGTCAAGGCAGGGCGGG	2:1850007-1850007+	G
2:1850007-1850007+|ABE|-|T:C|CTC:CCC|nucleotide|(ABE;-;@13;NGG;CTC:CCC;L:P;)	nucleotide mutations; remove mode	GCGCAGGGGTCAAGGCAGGGCGG	2:1850007-1850007+	G
2:1850007-1850007+|ABE|-|T:C|CTC:CCC|nucleotide|(ABE;-;@17;NG;CTC:CCC;L:P;)	nucleotide mutations; remove mode	AGGGGTCAAGGCAGGGCGGGGG	2:1850007-1850007+	G
2:1850007-1850007+|ABE|-|T:C|CTC:CCC|nucleotide|(ABE;-;@14;NG;CTC:CCC;L:P;)	nucleotide mutations; remove mode	CGCAGGGGTCAAGGCAGGGCGG	2:1850007-1850007+	G
2:1850007-1850007+|ABE|-|T:C|CTC:CCC|nucleotide|(ABE;-;@13;NG;CTC:CCC;L:P;)	nucleotide mutations; remove mode	GCGCAGGGGTCAAGGCAGGGCG	2:1850007-1850007+	G
5:27213650-27213650+|ABE|-|T:C|CTA:CCA|nucleotide|(ABE;-;@15;NG;CTA:CCA;L:P;)	nucleotide mutations; remove mode	CCGATGGCCTTTTATAAAACAG	5:27213650-27213650+	G
5:67994526-67994526-|ABE|-|T:C|CTA:CCA|nucleotide|(ABE;-;@15;NG;CTA:CCA;L:P;)	nucleotide mutations; remove mode	GAAATGGCAACCCACTCCAGTG	5:67994526-67994526-	G
10:26134742-26134742+|ABE|-|T:C|GTG:GCG|nucleotide|(ABE;-;@13;NG;GTG:GCG;V:A;)	nucleotide mutations; remove mode	CAGATCCGCCCCAGACCCCTGG	10:26134742-26134742+	G
10:7554165-7554165+|ABE|-|T:C|GTG:GCG|nucleotide|(ABE;-;@16;NGG;GTG:GCG;V:A;)	nucleotide mutations; remove mode	GGGCGCAGCGCCCGGGCGCCTGG	10:7554165-7554165+	G
10:7554165-7554165+|ABE|-|T:C|GTG:GCG|nucleotide|(ABE;-;@17;NG;GTG:GCG;V:A;)	nucleotide mutations; remove mode	GGCGCAGCGCCCGGGCGCCTGG	10:7554165-7554165+	G
10:7554165-7554165+|ABE|-|T:C|GTG:GCG|nucleotide|(ABE;-;@16;NG;GTG:GCG;V:A;)	nucleotide mutations; remove mode	GGGCGCAGCGCCCGGGCGCCTG	10:7554165-7554165+	G
5:26234786-26234786-|ABE|-|T:C|GTG:GCG|nucleotide|(ABE;-;@15;NGG;GTG:GCG;V:A;)	nucleotide mutations; remove mode	GAGACGCCTGGCGTTCTAAGCGG	5:26234786-26234786-	G
5:26234786-26234786-|ABE|-|T:C|GTG:GCG|nucleotide|(ABE;-;@15;NG;GTG:GCG;V:A;)	nucleotide mutations; remove mode	GAGACGCCTGGCGTTCTAAGCG	5:26234786-26234786-	G
27:13295240-13295240+|ABE|-|T:C|GTG:GCG|nucleotide|(ABE;-;@17;NG;GTG:GCG;V:A;)	nucleotide mutations; remove mode	CGCGCGAGCTGCCGCGACGCCG	27:13295240-13295240+	G
5:58883630-58883630-|Target-AID|-|G:A|CGG:CAG|nucleotide|(Target-AID;-;@18;NG;CGG:CAG;R:Q;)	nucleotide mutations; remove mode	ACTGAAAGAATGAAATGAGGTG	5:58883630-58883630-	T
11:9253134-9253134-|Target-AID|-|G:A|CGA:CAA|nucleotide|(Target-AID;-;@17;NG;CGA:CAA;R:Q;)	nucleotide mutations; remove mode	GCTTGCAGCCCCACACGGCAGG	11:9253134-9253134-	T
19:56975875-56975875-|Target-AID|-|G:A|CGC:CAC|nucleotide|(Target-AID;-;@19;NG;CGC:CAC;R:H;)	nucleotide mutations; remove mode	GTGCTGGGGGCAGCCCTTAGGG	19:56975875-56975875-	T
28:26503996-26503996-|Target-AID|-|G:A|TGG:TAG|nucleotide|(Target-AID;-;@17;NG;TGG:TAG;W:*;)	nucleotide mutations; remove mode	AACTACTCTTAAAAAGATTTTG	28:26503996-26503996-	T
22:53761489-53761489-|Target-AID|-|G:A|TGG:TAG|nucleotide|(Target-AID;-;@18;NG;TGG:TAG;W:*;)	nucleotide mutations; remove mode	GCTATGGCCATTGTGCTGGAAG	22:53761489-53761489-	T
10:25936005-25936005+|Target-AID|-|G:A|GGA:GAA|nucleotide|(Target-AID;-;@19;NG;GGA:GAA;G:E;)	nucleotide mutations; remove mode	TTCTCATTAGACAGTTCTACCG	10:25936005-25936005+	T
17:58405337-58405337-|Target-AID|-|G:A|CGC:CAC|nucleotide|(Target-AID;-;@19;NG;CGC:CAC;R:H;)	nucleotide mutations; remove mode	GTGCATTGAGCATTATTATTTG	17:58405337-58405337-	T
6:109613723-109613723-|Target-AID|-|G:A|GGC:GAC|nucleotide|(Target-AID;-;@19;NG;GGC:GAC;G:D;)	nucleotide mutations; remove mode	GTCTCTGTGTCCACCCTCGCCG	6:109613723-109613723-	T
20:71235391-71235391+|Target-AID|-|G:A|GGC:GAC|nucleotide|(Target-AID;-;@17;NG;GGC:GAC;G:D;)	nucleotide mutations; remove mode	GCGTCGGGGGCGCGGTGTGACG	20:71235391-71235391+	T
15:34577388-34577388+|Target-AID|-|G:A|GGG:GAG|nucleotide|(Target-AID;-;@17;NG;GGG:GAG;G:E;)	nucleotide mutations; remove mode	CGCTCGCCGCTCGAGCCGCGAG	15:34577388-34577388+	T
3:9859845-9859845+|Target-AID|-|G:A|GGT:GAT|nucleotide|(Target-AID;-;@18;NG;GGT:GAT;G:D;)	nucleotide mutations; remove mode	GATCAGGTCACAGGGATCAGCG	3:9859845-9859845+	T
5:27171825-27171825-|Target-AID|+|C:T|TCT:TTT|nucleotide|(Target-AID;+;@19;NG;TCT:TTT;S:F;)	nucleotide mutations; remove mode	TTTCATACGAGTGGGGTATGGG	5:27171825-27171825-	T
8:90264787-90264787-|Target-AID|+|C:T|CCG:CTG|nucleotide|(Target-AID;+;@17;NG;CCG:CTG;P:L;)	nucleotide mutations; remove mode	GTCTGGAAAATGCTGGACAAGG	8:90264787-90264787-	T
7:2586001-2586001-|Target-AID|+|C:T|GCG:GTG|nucleotide|(Target-AID;+;@19;NG;GCG:GTG;A:V;)	nucleotide mutations; remove mode	GTGCCTGCAAAGGCAGCATTAG	7:2586001-2586001-	T
13:59144494-59144494-|Target-AID|+|C:T|GCG:GTG|nucleotide|(Target-AID;+;@17;NG;GCG:GTG;A:V;)	nucleotide mutations; remove mode	ACGTGGGACCACCTTGGTGGAG	13:59144494-59144494-	T
13:59144494-59144494-|Target-AID|+|C:T|GCG:GTG|nucleotide|(Target-AID;+;@17;NGG;GCG:GTG;A:V;)	nucleotide mutations; remove mode	ACGTGGGACCACCTTGGTGGAGG	13:59144494-59144494-	T
19:28447534-28447534-|Target-AID|+|C:T|TCC:TTC|nucleotide|(Target-AID;+;@19;NG;TCC:TTC;S:F;)	nucleotide mutations; remove mode	TTCTGGAGGCCAGAAGTCCATG	19:28447534-28447534-	T
12:34924093-34924093-|Target-AID|+|C:T|TCC:TTC|nucleotide|(Target-AID;+;@18;NG;TCC:TTC;S:F;)	nucleotide mutations; remove mode	GTTCAGATGAGTCAAGTCACAG	12:34924093-34924093-	T
12:34924093-34924093-|Target-AID|+|C:T|TCC:TTC|nucleotide|(Target-AID;+;@19;NG;TCC:TTC;S:F;)	nucleotide mutations; remove mode	TTCAGATGAGTCAAGTCACAGG	12:34924093-34924093-	T
12:34924093-34924093-|Target-AID|+|C:T|TCC:TTC|nucleotide|(Target-AID;+;@18;NGG;TCC:TTC;S:F;)	nucleotide mutations; remove mode	GTTCAGATGAGTCAAGTCACAGG	12:34924093-34924093-	T
8:90300617-90300617-|Target-AID|+|C:T|TCC:TTC|nucleotide|(Target-AID;+;@19;NG;TCC:TTC;S:F;)	nucleotide mutations; remove mode	TTCACTTCAAAGAAATAAAATG	8:90300617-90300617-	T
19:44742051-44742051+|Target-AID|+|C:T|CCC:CTC|nucleotide|(Target-AID;+;@19;NG;CCC:CTC;P:L;)	nucleotide mutations; remove mode	CTCGAGGGCTTTGACGTCACCG	19:44742051-44742051+	T
19:44742051-44742051+|Target-AID|+|C:T|CCC:CTC|nucleotide|(Target-AID;+;@19;NGG;CCC:CTC;P:L;)	nucleotide mutations; remove mode	CTCGAGGGCTTTGACGTCACCGG	19:44742051-44742051+	T
9:61291341-61291341+|Target-AID|+|C:T|GCA:GTA|nucleotide|(Target-AID;+;@17;NG;GCA:GTA;A:V;)	nucleotide mutations; remove mode	ACGTAGTTAGTGGCAGTTCCGG	9:61291341-61291341+	T
12:32852726-32852726-|Target-AID|+|C:T|CCT:CTT|nucleotide|(Target-AID;+;@17;NG;CCT:CTT;P:L;)	nucleotide mutations; remove mode	TACTTGAAAATTCTGTTCTATG	12:32852726-32852726-	T
22:39119663-39119663-|Target-AID|+|C:T|TCT:TTT|nucleotide|(Target-AID;+;@19;NG;TCT:TTT;S:F;)	nucleotide mutations; remove mode	TTTCAGTTATTTTATTAAGAGG	22:39119663-39119663-	T
5:88099488-88099488+|Target-AID|+|C:T|ACC:ATC|nucleotide|(Target-AID;+;@18;NG;ACC:ATC;T:I;)	nucleotide mutations; remove mode	CATCTGCTCTCAGTCAATTTCG	5:88099488-88099488+	T
21:31408531-31408531+|Target-AID|+|C:T|GCC:GTC|nucleotide|(Target-AID;+;@18;NG;GCC:GTC;A:V;)	nucleotide mutations; remove mode	AGTCTTCGCTTATTGGCGGCGG	21:31408531-31408531+	T
21:31408531-31408531+|Target-AID|+|C:T|GCC:GTC|nucleotide|(Target-AID;+;@19;NG;GCC:GTC;A:V;)	nucleotide mutations; remove mode	GTCTTCGCTTATTGGCGGCGGG	21:31408531-31408531+	T
21:31408531-31408531+|Target-AID|+|C:T|GCC:GTC|nucleotide|(Target-AID;+;@18;NGG;GCC:GTC;A:V;)	nucleotide mutations; remove mode	AGTCTTCGCTTATTGGCGGCGGG	21:31408531-31408531+	T
21:31408531-31408531+|Target-AID|+|C:T|GCC:GTC|nucleotide|(Target-AID;+;@19;NGG;GCC:GTC;A:V;)	nucleotide mutations; remove mode	GTCTTCGCTTATTGGCGGCGGGG	21:31408531-31408531+	T
10:3997871-3997871-|Target-AID|+|C:T|GCC:GTC|nucleotide|(Target-AID;+;@18;NG;GCC:GTC;A:V;)	nucleotide mutations; remove mode	AGTCTTACAATCGAATCTTGTG	10:3997871-3997871-	T

## Sheet: Danio rerio
guide: id	mutation format; mode of mutagenesis	guide+PAM sequence	genome coordinate	nucleotide mutation	transcript: id	amino acid mutation	aminoacid: position
ENSDART00000000670|9|-|29003076|29003121|45|(ABE;-;@17;NG;GTC:GCC;V:A;)	amino acid mutations; create mode	TTGACTTTAAAAGGCTGGACAG			ENSDART00000000670	A	45
ENSDART00000001444|17|-|28811344|28811389|3|(Target-AID;-;@18;NGG;GCG:GCA;A:A;)	amino acid mutations; create mode	AACGCTTTCATTTTTAGGTGGGG			ENSDART00000001444	A	3
ENSDART00000001444|17|-|28811344|28811389|3|(Target-AID;-;@17;NGG;GCG:GCA;A:A;)	amino acid mutations; create mode	TAACGCTTTCATTTTTAGGTGGG			ENSDART00000001444	A	3
ENSDART00000001444|17|-|28811344|28811389|3|(Target-AID;-;@18;NG;GCG:GCA;A:A;)	amino acid mutations; create mode	AACGCTTTCATTTTTAGGTGGG			ENSDART00000001444	A	3
ENSDART00000001444|17|-|28811344|28811389|3|(Target-AID;-;@17;NG;GCG:GCA;A:A;)	amino acid mutations; create mode	TAACGCTTTCATTTTTAGGTGG			ENSDART00000001444	A	3
ENSDART00000001907|12|-|33354321|33354366|15|(ABE;+;@15;NG;GCA:GCG;A:A;)	amino acid mutations; create mode	AAAGCACCGGATGGAGGATGGG			ENSDART00000001907	A	15
ENSDART00000001907|12|-|33354321|33354366|15|(ABE;+;@16;NG;GCA:GCG;A:A;)	amino acid mutations; create mode	AAGCACCGGATGGAGGATGGGG			ENSDART00000001907	A	15
ENSDART00000001907|12|-|33354321|33354366|15|(ABE;+;@15;NGG;GCA:GCG;A:A;)	amino acid mutations; create mode	AAAGCACCGGATGGAGGATGGGG			ENSDART00000001907	A	15
ENSDART00000002728|6|+|40925681|40925726|4|(Target-AID;+;@17;NG;GAC:GAT;D:D;)	amino acid mutations; create mode	GGACGAAAATGGTGAAAACTTG			ENSDART00000002728	D	4
ENSDART00000002728|6|+|40925681|40925726|4|(Target-AID;+;@18;NG;GAC:GAT;D:D;)	amino acid mutations; create mode	GACGAAAATGGTGAAAACTTGG			ENSDART00000002728	D	4
ENSDART00000002728|6|+|40925681|40925726|4|(Target-AID;+;@17;NGG;GAC:GAT;D:D;)	amino acid mutations; create mode	GGACGAAAATGGTGAAAACTTGG			ENSDART00000002728	D	4
ENSDART00000002939|23|+|26017308|26017353|7|(Target-AID;+;@19;NG;GAC:GAT;D:D;)	amino acid mutations; create mode	ACTTCAGGAGACGAACCCGCTG			ENSDART00000002939	D	7
ENSDART00000002992|24|-|12977701|12977746|131|(Target-AID;-;@17;NG;GGC:GAC;G:D;)	amino acid mutations; create mode	CTGCCCTTTAAGCCAGAGGAAG			ENSDART00000002992	D	131
ENSDART00000003299|21|+|20397016|20397061|3|(Target-AID;-;@17;NG;GAG:GAA;E:E;)	amino acid mutations; create mode	CAACTCCTTCATTTTTATCCAG			ENSDART00000003299	E	3
ENSDART00000003494|25|+|35251273|35251318|6|(Target-AID;-;@18;NG;GAG:GAA;E:E;)	amino acid mutations; create mode	CGCTCCTTCACTGTATCCATCG			ENSDART00000003494	E	6
ENSDART00000003946|2|-|26620757|26620802|6|(Target-AID;+;@17;NG;TCC:TTC;S:F;)	amino acid mutations; create mode	AGTCCTACGGGATTTTGATGAG			ENSDART00000003946	F	6
ENSDART00000003957|5|-|24516743|24516788|37|(ABE;+;@17;NG;AGC:GGC;S:G;)	amino acid mutations; create mode	AAGAGCTGTAAAATGATCCTTG			ENSDART00000003957	G	37
ENSDART00000003978|21|-|32077200|32077245|36|(ABE;+;@17;NG;GAG:GGG;E:G;)	amino acid mutations; create mode	AAGAGTTTAAGAATAATGACTG			ENSDART00000003978	G	36
ENSDART00000003978|21|-|32077200|32077245|36|(ABE;+;@17;NGG;GAG:GGG;E:G;)	amino acid mutations; create mode	AAGAGTTTAAGAATAATGACTGG			ENSDART00000003978	G	36
ENSDART00000004521|8|+|26038457|26038502|50|(ABE;-;@16;NGG;TAC:CAC;Y:H;)	amino acid mutations; create mode	TGGTACTTTTCGGGGTCGAACGG			ENSDART00000004521	H	50
ENSDART00000004521|8|+|26038457|26038502|50|(ABE;-;@17;NG;TAC:CAC;Y:H;)	amino acid mutations; create mode	GGTACTTTTCGGGGTCGAACGG			ENSDART00000004521	H	50
ENSDART00000004521|8|+|26038457|26038502|50|(ABE;-;@16;NG;TAC:CAC;Y:H;)	amino acid mutations; create mode	TGGTACTTTTCGGGGTCGAACG			ENSDART00000004521	H	50
ENSDART00000004625|20|-|23426233|23426278|24|(ABE;-;@14;NGG;TAC:CAC;Y:H;)	amino acid mutations; create mode	TGGGGTATTTGTAGTAATAAGGG			ENSDART00000004625	H	24
ENSDART00000004625|20|-|23426233|23426278|24|(ABE;-;@13;NGG;TAC:CAC;Y:H;)	amino acid mutations; create mode	TTGGGGTATTTGTAGTAATAAGG			ENSDART00000004625	H	24
ENSDART00000004625|20|-|23426233|23426278|24|(ABE;-;@15;NG;TAC:CAC;Y:H;)	amino acid mutations; create mode	GGGGTATTTGTAGTAATAAGGG			ENSDART00000004625	H	24
ENSDART00000004625|20|-|23426233|23426278|24|(ABE;-;@14;NG;TAC:CAC;Y:H;)	amino acid mutations; create mode	TGGGGTATTTGTAGTAATAAGG			ENSDART00000004625	H	24
ENSDART00000004625|20|-|23426233|23426278|24|(ABE;-;@13;NG;TAC:CAC;Y:H;)	amino acid mutations; create mode	TTGGGGTATTTGTAGTAATAAG			ENSDART00000004625	H	24
ENSDART00000005313|17|-|15382193|15382238|61|(Target-AID;-;@19;NG;ATG:ATA;M:I;)	amino acid mutations; create mode	TCATCTTCAGGTGCAGATCTTG			ENSDART00000005313	I	61
ENSDART00000005326|7|+|19528305|19528350|4|(Target-AID;-;@19;NG;ATG:ATA;M:I;)	amino acid mutations; create mode	CCATCTTCAGCATGTAAGGCAG			ENSDART00000005326	I	4
ENSDART00000005740|18|+|23249509|23249554|5|(Target-AID;-;@17;NGG;AAG:AAA;K:K;)	amino acid mutations; create mode	TATCTTCTTCCGTCCCATCTTGG			ENSDART00000005740	K	5
ENSDART00000005740|18|+|23249509|23249554|5|(Target-AID;-;@18;NG;AAG:AAA;K:K;)	amino acid mutations; create mode	ATCTTCTTCCGTCCCATCTTGG			ENSDART00000005740	K	5
ENSDART00000005740|18|+|23249509|23249554|5|(Target-AID;-;@17;NG;AAG:AAA;K:K;)	amino acid mutations; create mode	TATCTTCTTCCGTCCCATCTTG			ENSDART00000005740	K	5
ENSDART00000006058|17|+|34246370|34246415|62|(Target-AID;+;@18;NG;CTC:CTT;L:L;)	amino acid mutations; create mode	CTCATCCGGATCGGACGCAACG			ENSDART00000006058	L	62
ENSDART00000006288|15|-|34930601|34930646|34|(Target-AID;+;@19;NG;TCG:TTG;S:L;)	amino acid mutations; create mode	TCGTCTGGACCTCAGGATTTTG			ENSDART00000006288	L	34
ENSDART00000006648|13|+|31648410|31648455|11|(Target-AID;+;@18;NG;ACG:ATG;T:M;)	amino acid mutations; create mode	GACGACAAAATACAGAAACCCG			ENSDART00000006648	M	11
ENSDART00000006971|21|-|39536667|39536712|98|(Target-AID;-;@19;NG;AGT:AAT;S:N;)	amino acid mutations; create mode	ACTTTTGGGGCGAGAGGGGCTG			ENSDART00000006971	N	98
ENSDART00000007401|9|-|52735077|52735122|27|(ABE;-;@15;NGG;CTG:CCG;L:P;)	amino acid mutations; create mode	CCTTCAGTTTGCCCACCAGCAGG			ENSDART00000007401	P	27
ENSDART00000007401|9|-|52735077|52735122|27|(ABE;-;@16;NG;CTG:CCG;L:P;)	amino acid mutations; create mode	CTTCAGTTTGCCCACCAGCAGG			ENSDART00000007401	P	27
ENSDART00000007401|9|-|52735077|52735122|27|(ABE;-;@15;NG;CTG:CCG;L:P;)	amino acid mutations; create mode	CCTTCAGTTTGCCCACCAGCAG			ENSDART00000007401	P	27
ENSDART00000007797|18|+|5514661|5514706|105|(ABE;-;@15;NGG;CTG:CCG;L:P;)	amino acid mutations; create mode	CGCCCAGTTTGCGCATGACCCGG			ENSDART00000007797	P	105
ENSDART00000007797|18|+|5514661|5514706|105|(ABE;-;@16;NG;CTG:CCG;L:P;)	amino acid mutations; create mode	GCCCAGTTTGCGCATGACCCGG			ENSDART00000007797	P	105
ENSDART00000007797|18|+|5514661|5514706|105|(ABE;-;@15;NG;CTG:CCG;L:P;)	amino acid mutations; create mode	CGCCCAGTTTGCGCATGACCCG			ENSDART00000007797	P	105
ENSDART00000007972|6|-|1874598|1874643|15|(Target-AID;-;@19;NGG;CAG:CAA;Q:Q;)	amino acid mutations; create mode	ACTGCTTCTCAAACTGGTCCAGG			ENSDART00000007972	Q	15
ENSDART00000007972|6|-|1874598|1874643|15|(Target-AID;-;@19;NG;CAG:CAA;Q:Q;)	amino acid mutations; create mode	ACTGCTTCTCAAACTGGTCCAG			ENSDART00000007972	Q	15
ENSDART00000008409|11|-|2128337|2128382|5|(ABE;+;@15;NG;CGA:CGG;R:R;)	amino acid mutations; create mode	AAGCGATTTGTGCATTTCCGAG			ENSDART00000008409	R	5
ENSDART00000008696|18|-|50921031|50921076|32|(ABE;-;@16;NG;TGG:CGG;W:R;)	amino acid mutations; create mode	TCCCACTTCCTGCTCCACACCG			ENSDART00000008696	R	32
ENSDART00000008893|12|-|4326687|4326732|115|(ABE;+;@16;NG;CAC:CGC;H:R;)	amino acid mutations; create mode	AAACACTTTCATCTTCACTGGG			ENSDART00000008893	R	115
ENSDART00000008893|12|-|4326687|4326732|115|(ABE;+;@17;NG;CAC:CGC;H:R;)	amino acid mutations; create mode	AACACTTTCATCTTCACTGGGG			ENSDART00000008893	R	115
ENSDART00000008893|12|-|4326687|4326732|115|(ABE;+;@16;NGG;CAC:CGC;H:R;)	amino acid mutations; create mode	AAACACTTTCATCTTCACTGGGG			ENSDART00000008893	R	115
ENSDART00000009092|23|-|19486517|19486562|11|(Target-AID;+;@17;NG;AGC:AGT;S:S;)	amino acid mutations; create mode	AAGCGACAAAGAGAGCAGCAAG			ENSDART00000009092	S	11
ENSDART00000009092|23|-|19486517|19486562|11|(Target-AID;+;@18;NG;AGC:AGT;S:S;)	amino acid mutations; create mode	AGCGACAAAGAGAGCAGCAAGG			ENSDART00000009092	S	11
ENSDART00000009092|23|-|19486517|19486562|11|(Target-AID;+;@17;NGG;AGC:AGT;S:S;)	amino acid mutations; create mode	AAGCGACAAAGAGAGCAGCAAGG			ENSDART00000009092	S	11
ENSDART00000009134|10|-|43963966|43964011|9|(Target-AID;+;@18;NG;AGC:AGT;S:S;)	amino acid mutations; create mode	AGCAGGACGGTGAAATCAGGTG			ENSDART00000009134	S	9
ENSDART00000009182|5|+|43006486|43006531|6|(Target-AID;+;@17;NG;AGC:AGT;S:S;)	amino acid mutations; create mode	AAGCGTTCTGGATAAGCTTGCG			ENSDART00000009182	S	6
ENSDART00000009184|7|-|51709850|51709895|5|(Target-AID;+;@19;NG;AGC:AGT;S:S;)	amino acid mutations; create mode	GCGACAGTAATGATGATAAAAG			ENSDART00000009184	S	5
ENSDART00000009382|6|+|13896739|13896784|3|(Target-AID;+;@17;NG;AGC:AGT;S:S;)	amino acid mutations; create mode	AAGCTCCAAAGAAGCTGTACAG			ENSDART00000009382	S	3
ENSDART00000009382|6|+|13896739|13896784|3|(Target-AID;+;@18;NG;AGC:AGT;S:S;)	amino acid mutations; create mode	AGCTCCAAAGAAGCTGTACAGG			ENSDART00000009382	S	3
ENSDART00000009382|6|+|13896739|13896784|3|(Target-AID;+;@17;NGG;AGC:AGT;S:S;)	amino acid mutations; create mode	AAGCTCCAAAGAAGCTGTACAGG			ENSDART00000009382	S	3
ENSDART00000009500|5|+|34549742|34549787|12|(Target-AID;-;@18;NG;GCC:ACC;A:T;)	amino acid mutations; create mode	GGCTTTTCCGCCTAGAAAAATG			ENSDART00000009500	T	12
ENSDART00000009590|22|+|6084755|6084800|3|(ABE;-;@15;NG;ATG:ACG;M:T;)	amino acid mutations; create mode	GAGCCATTTTCATGTAATATTG			ENSDART00000009590	T	3
ENSDART00000009653|4|+|74554727|74554772|49|(Target-AID;-;@17;NG;ACG:ACA;T:T;)	amino acid mutations; create mode	CAGCGTCTTGAGCTGCGTCTCG			ENSDART00000009653	T	49
ENSDART00000009689|19|+|7073955|7074000|25|(Target-AID;-;@19;NG;GCC:ACC;A:T;)	amino acid mutations; create mode	GCTTTCCAGCTGTGGGTTGCTG			ENSDART00000009689	T	25
ENSDART00000009790|9|-|46410236|46410281|23|(ABE;-;@16;NGG;ATA:ACA;I:T;)	amino acid mutations; create mode	CCATATCTTGCCCACGAAGGTGG			ENSDART00000009790	T	23
ENSDART00000009790|9|-|46410236|46410281|23|(ABE;-;@17;NG;ATA:ACA;I:T;)	amino acid mutations; create mode	CATATCTTGCCCACGAAGGTGG			ENSDART00000009790	T	23
ENSDART00000009790|9|-|46410236|46410281|23|(ABE;-;@16;NG;ATA:ACA;I:T;)	amino acid mutations; create mode	CCATATCTTGCCCACGAAGGTG			ENSDART00000009790	T	23
ENSDART00000010022|14|-|33613658|33613703|29|(ABE;-;@13;NG;ATG:ACG;M:T;)	amino acid mutations; create mode	GGAGCTCATTTTAGACCATCTG			ENSDART00000010022	T	29
ENSDART00000010246|9|-|9977696|9977741|28|(Target-AID;-;@18;NG;GTG:GTA;V:V;)	amino acid mutations; create mode	AGCACCTTTCCAGCTTGCACAG			ENSDART00000010246	V	28
ENSDART00000010261|13|-|1129891|1129936|27|(Target-AID;+;@17;NG;GTC:GTT;V:V;)	amino acid mutations; create mode	AGTCAAAAGTAAGAAAAGAGAG			ENSDART00000010261	V	27
ENSDART00000010282|21|-|21640771|21640816|5|(ABE;+;@15;NG;GTA:GTG;V:V;)	amino acid mutations; create mode	AAAGTAGCTGTAGTTACAGGGG			ENSDART00000010282	V	5
ENSDART00000010395|3|+|58170316|58170361|25|(Target-AID;+;@17;NG;GCT:GTT;A:V;)	amino acid mutations; create mode	AGGCTCTAACTGAACCTCTAAG			ENSDART00000010395	V	25
ENSDART00000010420|10|+|42523015|42523060|23|(Target-AID;+;@18;NG;GCA:GTA;A:V;)	amino acid mutations; create mode	GGCAGGCTTTGCTGGAGATCAG			ENSDART00000010420	V	23
ENSDART00000011519|4|+|26993154|26993199|3|(Target-AID;+;@17;NG;CAG:TAG;Q:*;)	amino acid mutations; create mode	AAGCAGGCTATCCCGTTTGAGG			ENSDART00000011519	*	3
ENSDART00000000670|9|-|29003076|29003121|45|(Target-AID;+;@19;NG;GCC:GTC;A:V;)	amino acid mutations; remove mode	GTCAATGTAAGTAAAAGTTCTG			ENSDART00000000670	V	45
ENSDART00000002661|20|+|221919|221964|53|(ABE;+;@16;NG;GAC:GGC;D:G;)	amino acid mutations; remove mode	AAAGGCCATGCGGATAGCTGTG			ENSDART00000002661	G	53
ENSDART00000003193|9|-|31106502|31106547|58|(Target-AID;-;@18;NG;GAA:AAA;E:K;)	amino acid mutations; remove mode	TTTCTTTAAATTTGGCCAAATG			ENSDART00000003193	K	58
ENSDART00000003299|21|+|20397016|20397061|3|(ABE;+;@14;NG;GAA:GAG;E:E;)	amino acid mutations; remove mode	GAAGGAGTTGGTGGAAGAGATG			ENSDART00000003299	E	3
ENSDART00000003346|25|+|30442481|30442526|21|(Target-AID;-;@18;NG;GAG:AAG;E:K;)	amino acid mutations; remove mode	CTTCTTGTCAATCGCTCCATCG			ENSDART00000003346	K	21
ENSDART00000003418|17|-|12763941|12763986|9|(Target-AID;-;@19;NGG;GAA:AAA;E:K;)	amino acid mutations; remove mode	TTCTTTTCTCTCGAGTGCACTGG			ENSDART00000003418	K	9
ENSDART00000003418|17|-|12763941|12763986|9|(Target-AID;-;@19;NG;GAA:AAA;E:K;)	amino acid mutations; remove mode	TTCTTTTCTCTCGAGTGCACTG			ENSDART00000003418	K	9
ENSDART00000003465|2|+|9560929|9560974|8|(Target-AID;-;@17;NG;GAG:AAG;E:K;)	amino acid mutations; remove mode	TCTTTTTCCTGAGTCCCAAAGG			ENSDART00000003465	K	8
ENSDART00000003482|9|+|24193141|24193186|37|(Target-AID;-;@19;NGG;GAG:GAA;E:E;)	amino acid mutations; remove mode	GTTCTTTGCCTATGTCAAACAGG			ENSDART00000003482	E	37
ENSDART00000003482|9|+|24193141|24193186|37|(Target-AID;-;@19;NG;GAG:GAA;E:E;)	amino acid mutations; remove mode	GTTCTTTGCCTATGTCAAACAG			ENSDART00000003482	E	37
ENSDART00000003494|25|+|35251273|35251318|6|(ABE;+;@15;NG;GAA:GAG;E:E;)	amino acid mutations; remove mode	AAGGAGCGAGTTTTGGCACCCG			ENSDART00000003494	E	6
ENSDART00000003494|25|+|35251273|35251318|6|(ABE;+;@15;NGG;GAA:GAG;E:E;)	amino acid mutations; remove mode	AAGGAGCGAGTTTTGGCACCCGG			ENSDART00000003494	E	6
ENSDART00000003957|5|-|24516743|24516788|37|(Target-AID;-;@19;NG;GGC:AGC;G:S;)	amino acid mutations; remove mode	CTCTTGCAGGGGCCGATCTGAG			ENSDART00000003957	S	37
ENSDART00000003957|5|-|24516743|24516788|37|(Target-AID;-;@17;NG;GGC:AGC;G:S;)	amino acid mutations; remove mode	AGCTCTTGCAGGGGCCGATCTG			ENSDART00000003957	S	37
ENSDART00000003993|14|-|34059536|34059581|9|(Target-AID;-;@17;NGG;GGG:GAG;G:E;)	amino acid mutations; remove mode	GTCTCCTTTAGGATGACCCTTGG			ENSDART00000003993	E	9
ENSDART00000003993|14|-|34059536|34059581|9|(Target-AID;-;@17;NG;GGG:GAG;G:E;)	amino acid mutations; remove mode	GTCTCCTTTAGGATGACCCTTG			ENSDART00000003993	E	9
ENSDART00000004031|16|+|20167914|20167959|16|(Target-AID;-;@19;NG;GGT:GAT;G:D;)	amino acid mutations; remove mode	ATCTTTCAGCGCCGCAGCGATG			ENSDART00000004031	D	16
ENSDART00000004220|15|-|15468275|15468320|10|(Target-AID;-;@18;NG;GGC:GAC;G:D;)	amino acid mutations; remove mode	GGTCTTTTCGTACAGGGGGCAG			ENSDART00000004220	D	10
ENSDART00000004241|24|+|3050076|3050121|27|(ABE;+;@15;NG;GGA:GGG;G:G;)	amino acid mutations; remove mode	AAAGGGAGCCTGCCGATGTCCG			ENSDART00000004241	G	27
ENSDART00000004241|24|+|3050076|3050121|27|(ABE;+;@17;NG;GGA:GGG;G:G;)	amino acid mutations; remove mode	AGGGAGCCTGCCGATGTCCGAG			ENSDART00000004241	G	27
ENSDART00000004284|16|-|29690059|29690104|5|(Target-AID;-;@17;NG;GGA:AGA;G:R;)	amino acid mutations; remove mode	CTCTTTTGAAAGACATGCTTGG			ENSDART00000004284	R	5
ENSDART00000004625|20|-|23426233|23426278|24|(Target-AID;+;@19;NG;CAC:TAC;H:Y;)	amino acid mutations; remove mode	ATACCCCAAATTCAAGGGCTGG			ENSDART00000004625	Y	24
ENSDART00000005326|7|+|19528305|19528350|4|(ABE;+;@15;NG;ATA:ATG;I:M;)	amino acid mutations; remove mode	AAGATGGCCGAGGTTGACAATG			ENSDART00000005326	M	4
ENSDART00000005547|19|-|5123168|5123213|9|(ABE;+;@17;NG;AAA:AAG;K:K;)	amino acid mutations; remove mode	AAAGGAGGCTGAAGGCCTGAAG			ENSDART00000005547	K	9
ENSDART00000005903|6|-|10835527|10835572|7|(Target-AID;+;@19;NG;CTC:TTC;L:F;)	amino acid mutations; remove mode	GTTCGTGTCCACACCCGCACTG			ENSDART00000005903	F	7
ENSDART00000005903|6|-|10835527|10835572|7|(Target-AID;+;@19;NGG;CTC:TTC;L:F;)	amino acid mutations; remove mode	GTTCGTGTCCACACCCGCACTGG			ENSDART00000005903	F	7
ENSDART00000006058|17|+|34246370|34246415|62|(ABE;-;@16;NGG;CTT:CTC;L:L;)	amino acid mutations; remove mode	GGATGAGTTTGTTGATGGATCGG			ENSDART00000006058	L	62
ENSDART00000006058|17|+|34246370|34246415|62|(ABE;-;@17;NG;CTT:CTC;L:L;)	amino acid mutations; remove mode	GATGAGTTTGTTGATGGATCGG			ENSDART00000006058	L	62
ENSDART00000006058|17|+|34246370|34246415|62|(ABE;-;@16;NG;CTT:CTC;L:L;)	amino acid mutations; remove mode	GGATGAGTTTGTTGATGGATCG			ENSDART00000006058	L	62
ENSDART00000006288|15|-|34930601|34930646|34|(ABE;-;@16;NG;TTG:TCG;L:S;)	amino acid mutations; remove mode	AGACGACTTCTGAACCAGTCCG			ENSDART00000006288	S	34
ENSDART00000006338|19|-|44063510|44063555|75|(ABE;-;@14;NGG;CTT:CCT;L:P;)	amino acid mutations; remove mode	TTTCCAGGCTTGTTCTGTTGGGG			ENSDART00000006338	P	75
ENSDART00000006338|19|-|44063510|44063555|75|(ABE;-;@13;NGG;CTT:CCT;L:P;)	amino acid mutations; remove mode	TTTTCCAGGCTTGTTCTGTTGGG			ENSDART00000006338	P	75
ENSDART00000006338|19|-|44063510|44063555|75|(ABE;-;@15;NG;CTT:CCT;L:P;)	amino acid mutations; remove mode	TTCCAGGCTTGTTCTGTTGGGG			ENSDART00000006338	P	75
ENSDART00000006338|19|-|44063510|44063555|75|(ABE;-;@14;NG;CTT:CCT;L:P;)	amino acid mutations; remove mode	TTTCCAGGCTTGTTCTGTTGGG			ENSDART00000006338	P	75
ENSDART00000006338|19|-|44063510|44063555|75|(ABE;-;@13;NG;CTT:CCT;L:P;)	amino acid mutations; remove mode	TTTTCCAGGCTTGTTCTGTTGG			ENSDART00000006338	P	75
ENSDART00000006580|11|-|22305466|22305511|68|(ABE;+;@14;NG;ATG:GTG;M:V;)	amino acid mutations; remove mode	TTACAGGTGCAGACCCATCTTG			ENSDART00000006580	V	68
ENSDART00000006971|21|-|39536667|39536712|98|(ABE;+;@16;NG;AAT:AGT;N:S;)	amino acid mutations; remove mode	AAAAGTCCATGGGCCAGATTTG			ENSDART00000006971	S	98
ENSDART00000007353|6|+|41453250|41453295|3|(Target-AID;+;@17;NG;CCC:CTC;P:L;)	amino acid mutations; remove mode	AGCTCACAGACAGTGTGCTGAG			ENSDART00000007353	L	3
ENSDART00000007353|6|+|41453250|41453295|3|(Target-AID;+;@17;NGG;CCC:CTC;P:L;)	amino acid mutations; remove mode	AGCTCACAGACAGTGTGCTGAGG			ENSDART00000007353	L	3
ENSDART00000007531|1|+|23784898|23784943|6|(Target-AID;+;@19;NG;CCA:TCA;P:S;)	amino acid mutations; remove mode	ATCAGTGGTGCTCTGTGCGTTG			ENSDART00000007531	S	6
ENSDART00000007972|6|-|1874598|1874643|15|(ABE;+;@14;NG;CAA:CAG;Q:Q;)	amino acid mutations; remove mode	GAAGCAGTTGCCAGGCCAGCAG			ENSDART00000007972	Q	15
ENSDART00000007972|6|-|1874598|1874643|15|(ABE;+;@15;NG;CAA:CAG;Q:Q;)	amino acid mutations; remove mode	AAGCAGTTGCCAGGCCAGCAGG			ENSDART00000007972	Q	15
ENSDART00000007972|6|-|1874598|1874643|15|(ABE;+;@14;NGG;CAA:CAG;Q:Q;)	amino acid mutations; remove mode	GAAGCAGTTGCCAGGCCAGCAGG			ENSDART00000007972	Q	15
ENSDART00000008275|9|-|41037015|41037060|7|(ABE;+;@16;NG;CAG:CGG;Q:R;)	amino acid mutations; remove mode	AAACGGAGAAAAGAAATGGACG			ENSDART00000008275	R	7
ENSDART00000008594|11|+|30514085|30514130|4|(ABE;+;@14;NG;CGA:CGG;R:R;)	amino acid mutations; remove mode	GAAACGGGCTCTTGTAACGGCG			ENSDART00000008594	R	4
ENSDART00000008785|7|-|33349879|33349924|5|(Target-AID;-;@17;NG;AGG:AAG;R:K;)	amino acid mutations; remove mode	CTCTTTTTCATATCCATCTCTG			ENSDART00000008785	K	5
ENSDART00000008816|17|-|44247408|44247453|7|(Target-AID;-;@19;NG;CGA:CAA;R:Q;)	amino acid mutations; remove mode	TTGCTTGAGATACGACATCATG			ENSDART00000008816	Q	7
ENSDART00000009172|12|+|38563456|38563501|36|(ABE;-;@17;NG;TCG:CCG;S:P;)	amino acid mutations; remove mode	GCGGTTTAAATGTGTGATCCAG			ENSDART00000009172	P	36
ENSDART00000009343|13|-|40316196|40316241|30|(ABE;-;@15;NG;TCT:CCT;S:P;)	amino acid mutations; remove mode	CTGAGGTTTGAGGGCAGTGCTG			ENSDART00000009343	P	30
ENSDART00000009382|6|+|13896739|13896784|3|(ABE;-;@15;NG;AGT:AGC;S:S;)	amino acid mutations; remove mode	TTGGAGCTTTTCATGATGAAAG			ENSDART00000009382	S	3
ENSDART00000009642|7|+|48870638|48870683|14|(ABE;+;@17;NG;ACA:ACG;T:T;)	amino acid mutations; remove mode	AACGGAGGAAACACGAACAACG			ENSDART00000009642	T	14
ENSDART00000009642|7|+|48870638|48870683|14|(ABE;+;@17;NGG;ACA:ACG;T:T;)	amino acid mutations; remove mode	AACGGAGGAAACACGAACAACGG			ENSDART00000009642	T	14
ENSDART00000010282|21|-|21640771|21640816|5|(Target-AID;-;@17;NGG;GTG:GTA;V:V;)	amino acid mutations; remove mode	AGCTACTTTTTGGGACATGTTGG			ENSDART00000010282	V	5
ENSDART00000010282|21|-|21640771|21640816|5|(Target-AID;-;@18;NG;GTG:GTA;V:V;)	amino acid mutations; remove mode	GCTACTTTTTGGGACATGTTGG			ENSDART00000010282	V	5
ENSDART00000010282|21|-|21640771|21640816|5|(Target-AID;-;@17;NG;GTG:GTA;V:V;)	amino acid mutations; remove mode	AGCTACTTTTTGGGACATGTTG			ENSDART00000010282	V	5
ENSDART00000010373|19|-|5332518|5332563|75|(Target-AID;-;@18;NG;GTC:ATC;V:I;)	amino acid mutations; remove mode	GATCTTCTCATTGCCGATGATG			ENSDART00000010373	I	75
ENSDART00000010395|3|+|58170316|58170361|25|(ABE;-;@16;NGG;GTT:GCT;V:A;)	amino acid mutations; remove mode	TAGAGCCTTGTTCCTCCTGGCGG			ENSDART00000010395	A	25
ENSDART00000010395|3|+|58170316|58170361|25|(ABE;-;@16;NG;GTT:GCT;V:A;)	amino acid mutations; remove mode	TAGAGCCTTGTTCCTCCTGGCG			ENSDART00000010395	A	25
ENSDART00000011149|25|+|18712072|18712117|41|(ABE;-;@14;NG;TAC:CAC;Y:H;)	amino acid mutations; remove mode	CTAAGTGTTTCACAGTAGCGGG			ENSDART00000011149	H	41
9:34089056-34089056+|Target-AID|-|G:A|CGC:CAC|nucleotide|(Target-AID;-;@19;NG;CGC:CAC;R:H;)	nucleotide mutations; create mode	GCGTTTATTTCCTGATGATCAG	9:34089056-34089056+	T
21:27437767-27437767-|Target-AID|-|G:A|CGC:CAC|nucleotide|(Target-AID;-;@18;NG;CGC:CAC;R:H;)	nucleotide mutations; create mode	GGCGGATCATTCTGCTGTGGCG	21:27437767-27437767-	T
7:32624584-32624584-|Target-AID|-|G:A|AGC:AAC|nucleotide|(Target-AID;-;@18;NG;AGC:AAC;S:N;)	nucleotide mutations; create mode	TGCTTTTATTTTTATTATTGTG	7:32624584-32624584-	T
14:25005303-25005303-|Target-AID|-|G:A|TGT:TAT|nucleotide|(Target-AID;-;@18;NG;TGT:TAT;C:Y;)	nucleotide mutations; create mode	CACACATACACGCGTACAACTG	14:25005303-25005303-	T
5:25044211-25044211-|Target-AID|-|G:A|TGT:TAT|nucleotide|(Target-AID;-;@17;NGG;TGT:TAT;C:Y;)	nucleotide mutations; create mode	AGACAAAGAAAAGAACATTGTGG	5:25044211-25044211-	T
5:25044211-25044211-|Target-AID|-|G:A|TGT:TAT|nucleotide|(Target-AID;-;@18;NG;TGT:TAT;C:Y;)	nucleotide mutations; create mode	GACAAAGAAAAGAACATTGTGG	5:25044211-25044211-	T
5:25044211-25044211-|Target-AID|-|G:A|TGT:TAT|nucleotide|(Target-AID;-;@17;NG;TGT:TAT;C:Y;)	nucleotide mutations; create mode	AGACAAAGAAAAGAACATTGTG	5:25044211-25044211-	T
1:44582269-44582269+|Target-AID|-|G:A|TGT:TAT|nucleotide|(Target-AID;-;@18;NG;TGT:TAT;C:Y;)	nucleotide mutations; create mode	AACAGACTTGTATATGGTGGTG	1:44582269-44582269+	T
17:28798625-28798625-|Target-AID|-|G:A|AGA:AAA|nucleotide|(Target-AID;-;@19;NG;AGA:AAA;R:K;)	nucleotide mutations; create mode	TCTGACTAAAAATGTATATCAG	17:28798625-28798625-	T
13:24579008-24579008+|Target-AID|-|G:A|GGA:GAA|nucleotide|(Target-AID;-;@17;NG;GGA:GAA;G:E;)	nucleotide mutations; create mode	AATCCCTCCTTTCTGACAACCG	13:24579008-24579008+	T
19:26810108-26810108-|Target-AID|-|G:A|TGA:TAA|nucleotide|(Target-AID;-;@18;NG;TGA:TAA;*:*;)	nucleotide mutations; create mode	CTCAAAAACAGTATTCCATACG	19:26810108-26810108-	T
11:30253868-30253868+|Target-AID|-|G:A|CGT:CAT|nucleotide|(Target-AID;-;@18;NG;CGT:CAT;R:H;)	nucleotide mutations; create mode	AACGATTCGTTCAGCGGTTCAG	11:30253868-30253868+	T
4:13411930-13411930+|Target-AID|-|G:A|TGA:TAA|nucleotide|(Target-AID;-;@19;NG;TGA:TAA;*:*;)	nucleotide mutations; create mode	TCATTTGGGCATCGTGTTTGTG	4:13411930-13411930+	T
13:37586391-37586391-|Target-AID|-|G:A|TGT:TAT|nucleotide|(Target-AID;-;@19;NG;TGT:TAT;C:Y;)	nucleotide mutations; create mode	ACAAGATATTGATTAAATCAAG	13:37586391-37586391-	T
8:50968890-50968890-|Target-AID|+|C:T|ACT:ATT|nucleotide|(Target-AID;+;@19;NG;ACT:ATT;T:I;)	nucleotide mutations; create mode	ACTAAAATTTCTTTAAGGCAAG	8:50968890-50968890-	T
19:44049552-44049552-|Target-AID|+|C:T|ACT:ATT|nucleotide|(Target-AID;+;@19;NG;ACT:ATT;T:I;)	nucleotide mutations; create mode	ACTGCAGAAATACATTCTGATG	19:44049552-44049552-	T
5:20319419-20319419+|Target-AID|+|C:T|GCG:GTG|nucleotide|(Target-AID;+;@17;NG;GCG:GTG;A:V;)	nucleotide mutations; create mode	AGGCGGGGCTACGTTGAATGTG	5:20319419-20319419+	T
11:1337520-1337520-|Target-AID|+|C:T|ACA:ATA|nucleotide|(Target-AID;+;@19;NG;ACA:ATA;T:I;)	nucleotide mutations; create mode	ACAGCTTTTGACTTGTTTCTAG	11:1337520-1337520-	T
23:215912-215912+|Target-AID|+|C:T|ACA:ATA|nucleotide|(Target-AID;+;@19;NG;ACA:ATA;T:I;)	nucleotide mutations; create mode	ACAGACTGTCTGGGAGATGCTG	23:215912-215912+	T
8:11884571-11884571-|Target-AID|+|C:T|ACA:ATA|nucleotide|(Target-AID;+;@18;NG;ACA:ATA;T:I;)	nucleotide mutations; create mode	GACACAAGTCTCAAGCCTCATG	8:11884571-11884571-	T
8:14185195-14185195-|Target-AID|+|C:T|ACA:ATA|nucleotide|(Target-AID;+;@18;NG;ACA:ATA;T:I;)	nucleotide mutations; create mode	AACATGTTGAAGAGCTGAAGCG	8:14185195-14185195-	T
2:9513060-9513060-|Target-AID|+|C:T|TCT:TTT|nucleotide|(Target-AID;+;@18;NG;TCT:TTT;S:F;)	nucleotide mutations; create mode	ATCTGAATGAATGAAATAATCG	2:9513060-9513060-	T
6:8355022-8355022-|Target-AID|+|C:T|TCT:TTT|nucleotide|(Target-AID;+;@17;NG;TCT:TTT;S:F;)	nucleotide mutations; create mode	GATCTGGACTGAAGTTTTAACG	6:8355022-8355022-	T
6:8355022-8355022-|Target-AID|+|C:T|TCT:TTT|nucleotide|(Target-AID;+;@19;NG;TCT:TTT;S:F;)	nucleotide mutations; create mode	TCTGGACTGAAGTTTTAACGAG	6:8355022-8355022-	T
5:33266310-33266310-|Target-AID|+|C:T|GCT:GTT|nucleotide|(Target-AID;+;@18;NG;GCT:GTT;A:V;)	nucleotide mutations; create mode	GGCTAATCAGTTTTTACCACAG	5:33266310-33266310-	T
18:20642278-20642278-|Target-AID|+|C:T|GCT:GTT|nucleotide|(Target-AID;+;@18;NG;GCT:GTT;A:V;)	nucleotide mutations; create mode	TGCTGGGTGGCCCAAAAAAGAG	18:20642278-20642278-	T
23:20127783-20127783-|Target-AID|+|C:T|ACC:ATC|nucleotide|(Target-AID;+;@17;NG;ACC:ATC;T:I;)	nucleotide mutations; create mode	AGACCAACCCACATTAAAGGGG	23:20127783-20127783-	T
23:17431245-17431245-|Target-AID|+|C:T|GCA:GTA|nucleotide|(Target-AID;+;@17;NG;GCA:GTA;A:V;)	nucleotide mutations; create mode	CAGCAGAGATGCTAAAGCTAGG	23:17431245-17431245-	T
23:17431245-17431245-|Target-AID|+|C:T|GCA:GTA|nucleotide|(Target-AID;+;@18;NG;GCA:GTA;A:V;)	nucleotide mutations; create mode	AGCAGAGATGCTAAAGCTAGGG	23:17431245-17431245-	T
23:17431245-17431245-|Target-AID|+|C:T|GCA:GTA|nucleotide|(Target-AID;+;@19;NG;GCA:GTA;A:V;)	nucleotide mutations; create mode	GCAGAGATGCTAAAGCTAGGGG	23:17431245-17431245-	T
23:17431245-17431245-|Target-AID|+|C:T|GCA:GTA|nucleotide|(Target-AID;+;@17;NGG;GCA:GTA;A:V;)	nucleotide mutations; create mode	CAGCAGAGATGCTAAAGCTAGGG	23:17431245-17431245-	T
23:17431245-17431245-|Target-AID|+|C:T|GCA:GTA|nucleotide|(Target-AID;+;@18;NGG;GCA:GTA;A:V;)	nucleotide mutations; create mode	AGCAGAGATGCTAAAGCTAGGGG	23:17431245-17431245-	T
12:30981586-30981586-|ABE|+|A:G|CAT:CGT|nucleotide|(ABE;+;@14;NG;CAT:CGT;H:R;)	nucleotide mutations; create mode	CCTGTCATTATCTAAAAAAAAG	12:30981586-30981586-	G
22:10201726-10201726+|Target-AID|+|C:T|ACA:ATA|nucleotide|(Target-AID;+;@18;NG;ACA:ATA;T:I;)	nucleotide mutations; create mode	GACAGTCTGACGGCAACTTCCG	22:10201726-10201726+	T
1:9954389-9954389+|Target-AID|+|C:T|TCT:TTT|nucleotide|(Target-AID;+;@18;NG;TCT:TTT;S:F;)	nucleotide mutations; create mode	CTCTCCAACGGTCTCAGACCAG	1:9954389-9954389+	T
18:50124197-50124197-|Target-AID|+|C:T|GCG:GTG|nucleotide|(Target-AID;+;@18;NG;GCG:GTG;A:V;)	nucleotide mutations; create mode	AGCGCTGAAGTGGCAGTTTTAG	18:50124197-50124197-	T
18:50124197-50124197-|Target-AID|+|C:T|GCG:GTG|nucleotide|(Target-AID;+;@18;NGG;GCG:GTG;A:V;)	nucleotide mutations; create mode	AGCGCTGAAGTGGCAGTTTTAGG	18:50124197-50124197-	T
5:72108141-72108141+|Target-AID|+|C:T|ACT:ATT|nucleotide|(Target-AID;+;@17;NG;ACT:ATT;T:I;)	nucleotide mutations; create mode	AGACTGGCGCATTTTCTCAGTG	5:72108141-72108141+	T
5:72108141-72108141+|Target-AID|+|C:T|ACT:ATT|nucleotide|(Target-AID;+;@18;NG;ACT:ATT;T:I;)	nucleotide mutations; create mode	GACTGGCGCATTTTCTCAGTGG	5:72108141-72108141+	T
5:72108141-72108141+|Target-AID|+|C:T|ACT:ATT|nucleotide|(Target-AID;+;@17;NGG;ACT:ATT;T:I;)	nucleotide mutations; create mode	AGACTGGCGCATTTTCTCAGTGG	5:72108141-72108141+	T
1:50921166-50921166+|Target-AID|+|C:T|GCA:GTA|nucleotide|(Target-AID;+;@18;NG;GCA:GTA;A:V;)	nucleotide mutations; create mode	AGCAGTCGTCTGTGAGAGCAAG	1:50921166-50921166+	T
3:39600490-39600490+|ABE|+|A:G|TAT:TGT|nucleotide|(ABE;+;@14;NG;TAT:TGT;Y:C;)	nucleotide mutations; create mode	ATGTGTATGCCTATTTTGTCTG	3:39600490-39600490+	G
20:37661447-37661447+|ABE|+|A:G|TAC:TGC|nucleotide|(ABE;+;@13;NG;TAC:TGC;Y:C;)	nucleotide mutations; create mode	CGTCTTTACCGGATCCGCGCGG	20:37661447-37661447+	G
12:46883685-46883685+|ABE|+|A:G|TAT:TGT|nucleotide|(ABE;+;@14;NG;TAT:TGT;Y:C;)	nucleotide mutations; create mode	AAGTTTATTCTGTTGTGGTGCG	12:46883685-46883685+	G
12:46883685-46883685+|ABE|+|A:G|TAT:TGT|nucleotide|(ABE;+;@15;NG;TAT:TGT;Y:C;)	nucleotide mutations; create mode	AGTTTATTCTGTTGTGGTGCGG	12:46883685-46883685+	G
12:46883685-46883685+|ABE|+|A:G|TAT:TGT|nucleotide|(ABE;+;@14;NGG;TAT:TGT;Y:C;)	nucleotide mutations; create mode	AAGTTTATTCTGTTGTGGTGCGG	12:46883685-46883685+	G
18:24919514-24919514+|ABE|+|A:G|GAA:GGA|nucleotide|(ABE;+;@13;NG;GAA:GGA;E:G;)	nucleotide mutations; create mode	AACCCTGAATTGACTGTGACAG	18:24919514-24919514+	G
1:31531890-31531890-|ABE|+|A:G|GAT:GGT|nucleotide|(ABE;+;@13;NG;GAT:GGT;D:G;)	nucleotide mutations; create mode	TTTTGGGATATATATTAAACAG	1:31531890-31531890-	G
19:29303747-29303747+|ABE|+|A:G|GAG:GGG|nucleotide|(ABE;+;@17;NG;GAG:GGG;E:G;)	nucleotide mutations; create mode	AGGAGGCCGCCATCTTGCTTAG	19:29303747-29303747+	G
15:4549140-4549140-|ABE|+|A:G|GAC:GGC|nucleotide|(ABE;+;@17;NG;GAC:GGC;D:G;)	nucleotide mutations; create mode	TAGACCTGCTACACCAGTCTTG	15:4549140-4549140-	G
23:409478-409478+|ABE|+|A:G|CAT:CGT|nucleotide|(ABE;+;@15;NG;CAT:CGT;H:R;)	nucleotide mutations; create mode	CATGCATGTGCGCGCGCGCGCG	23:409478-409478+	G
23:409478-409478+|ABE|+|A:G|CAT:CGT|nucleotide|(ABE;+;@17;NG;CAT:CGT;H:R;)	nucleotide mutations; create mode	TGCATGTGCGCGCGCGCGCGTG	23:409478-409478+	G
5:60886003-60886003+|ABE|+|A:G|CAT:CGT|nucleotide|(ABE;+;@14;NG;CAT:CGT;H:R;)	nucleotide mutations; create mode	TGTTGCATAAGCCAATGGCATG	5:60886003-60886003+	G
1:34615956-34615956-|ABE|+|A:G|CAG:CGG|nucleotide|(ABE;+;@16;NG;CAG:CGG;Q:R;)	nucleotide mutations; create mode	GTACAGTCTAAATATCTGAACG	1:34615956-34615956-	G
2:50104711-50104711-|ABE|-|T:C|CTA:CCA|nucleotide|(ABE;-;@16;NG;CTA:CCA;L:P;)	nucleotide mutations; create mode	GAATAGTCACGCAAGCTGTCTG	2:50104711-50104711-	G
25:17589995-17589995+|ABE|-|T:C|ATG:ACG|nucleotide|(ABE;-;@16;NG;ATG:ACG;M:T;)	nucleotide mutations; create mode	TTTCATTTAGAATTATTCATTG	25:17589995-17589995+	G
21:26485749-26485749-|ABE|-|T:C|CTG:CCG|nucleotide|(ABE;-;@16;NG;CTG:CCG;L:P;)	nucleotide mutations; create mode	CAGCAGGTCCTTGTTGGTTCTG	21:26485749-26485749-	G
20:34121718-34121718-|ABE|-|T:C|GTT:GCT|nucleotide|(ABE;-;@17;NG;GTT:GCT;V:A;)	nucleotide mutations; create mode	TAAACTTTCAGTCAATTTTGAG	20:34121718-34121718-	G
7:38349567-38349567+|ABE|-|T:C|CTA:CCA|nucleotide|(ABE;-;@17;NG;CTA:CCA;L:P;)	nucleotide mutations; create mode	GGTAGGCGGAGCTTGTGTGATG	7:38349567-38349567+	G
7:38349567-38349567+|ABE|-|T:C|CTA:CCA|nucleotide|(ABE;-;@14;NG;CTA:CCA;L:P;)	nucleotide mutations; create mode	TTTGGTAGGCGGAGCTTGTGTG	7:38349567-38349567+	G
12:17710325-17710325-|ABE|-|T:C|CTA:CCA|nucleotide|(ABE;-;@14;NG;CTA:CCA;L:P;)	nucleotide mutations; create mode	CCTTTTAGCCTTACAGTGATCG	12:17710325-17710325-	G
13:15762179-15762179-|ABE|-|T:C|CTT:CCT|nucleotide|(ABE;-;@17;NG;CTT:CCT;L:P;)	nucleotide mutations; create mode	ACAAGTGTGTAAATTCATGTTG	13:15762179-15762179-	G
6:41038657-41038657+|ABE|-|T:C|ATG:ACG|nucleotide|(ABE;-;@17;NG;ATG:ACG;M:T;)	nucleotide mutations; create mode	TTCATTTTGGAAGAAAGTTATG	6:41038657-41038657+	G
16:44678202-44678202+|ABE|-|T:C|ATG:ACG|nucleotide|(ABE;-;@17;NG;ATG:ACG;M:T;)	nucleotide mutations; create mode	ATCATGTCTTTGCTAAAGTGTG	16:44678202-44678202+	G
16:44678202-44678202+|ABE|-|T:C|ATG:ACG|nucleotide|(ABE;-;@15;NG;ATG:ACG;M:T;)	nucleotide mutations; create mode	GCATCATGTCTTTGCTAAAGTG	16:44678202-44678202+	G
3:58167203-58167203+|ABE|-|T:C|GTG:GCG|nucleotide|(ABE;-;@15;NG;GTG:GCG;V:A;)	nucleotide mutations; create mode	AGTTCACCCTAAAGTTACAATG	3:58167203-58167203+	G
20:21595144-21595144+|ABE|-|T:C|GTG:GCG|nucleotide|(ABE;-;@17;NG;GTG:GCG;V:A;)	nucleotide mutations; create mode	AGCACCTGCAGAATGACAGAAG	20:21595144-21595144+	G
2:26682813-26682813+|ABE|-|T:C|GTG:GCG|nucleotide|(ABE;-;@17;NG;GTG:GCG;V:A;)	nucleotide mutations; create mode	AGCACGTGTCAAGTGTTCACAG	2:26682813-26682813+	G
24:20188814-20188814-|ABE|-|T:C|GTG:GCG|nucleotide|(ABE;-;@16;NG;GTG:GCG;V:A;)	nucleotide mutations; create mode	AGCCACTGATATTTTTTTGAAG	24:20188814-20188814-	G
19:192641-192641-|ABE|-|T:C|CTC:CCC|nucleotide|(ABE;-;@13;NG;CTC:CCC;L:P;)	nucleotide mutations; create mode	CAGCGTGAGCCGGATTTAAGTG	19:192641-192641-	G
6:55909695-55909695-|ABE|-|T:C|ATC:ACC|nucleotide|(ABE;-;@17;NGG;ATC:ACC;I:T;)	nucleotide mutations; create mode	TGGATGGGTGGATAGATTGATGG	6:55909695-55909695-	G
6:55909695-55909695-|ABE|-|T:C|ATC:ACC|nucleotide|(ABE;-;@17;NG;ATC:ACC;I:T;)	nucleotide mutations; create mode	TGGATGGGTGGATAGATTGATG	6:55909695-55909695-	G
6:55909695-55909695-|ABE|-|T:C|ATC:ACC|nucleotide|(ABE;-;@14;NG;ATC:ACC;I:T;)	nucleotide mutations; create mode	AGATGGATGGGTGGATAGATTG	6:55909695-55909695-	G
23:37815545-37815545+|ABE|-|T:C|GTC:GCC|nucleotide|(ABE;-;@15;NG;GTC:GCC;V:A;)	nucleotide mutations; create mode	CTGGGACTAAATCCCTTCAAAG	23:37815545-37815545+	G
19:15521897-15521897+|ABE|+|A:G|TAT:TGT|nucleotide|(ABE;+;@17;NG;TAT:TGT;Y:C;)	nucleotide mutations; remove mode	CGTGTGTAGATAGAATGTACAG	19:15521897-15521897+	G
19:7115123-7115123+|ABE|+|A:G|GAC:GGC|nucleotide|(ABE;+;@13;NG;GAC:GGC;D:G;)	nucleotide mutations; remove mode	AAAGAGGGCTCGAGGACGTGAG	19:7115123-7115123+	G
14:5394530-5394530-|ABE|+|A:G|TAC:TGC|nucleotide|(ABE;+;@14;NG;TAC:TGC;Y:C;)	nucleotide mutations; remove mode	TTGCATGCACAGTTGAAGTCAG	14:5394530-5394530-	G
13:24579008-24579008+|ABE|+|A:G|GAA:GGA|nucleotide|(ABE;+;@17;NG;GAA:GGA;E:G;)	nucleotide mutations; remove mode	AGGGATTTTGTTACACTACCTG	13:24579008-24579008+	G
13:24579008-24579008+|ABE|+|A:G|GAA:GGA|nucleotide|(ABE;+;@17;NGG;GAA:GGA;E:G;)	nucleotide mutations; remove mode	AGGGATTTTGTTACACTACCTGG	13:24579008-24579008+	G
19:10493507-10493507+|ABE|+|A:G|GAA:GGA|nucleotide|(ABE;+;@16;NG;GAA:GGA;E:G;)	nucleotide mutations; remove mode	TGTGGATTTTCTTAATGTTTTG	19:10493507-10493507+	G
19:10493507-10493507+|ABE|+|A:G|GAA:GGA|nucleotide|(ABE;+;@17;NG;GAA:GGA;E:G;)	nucleotide mutations; remove mode	GTGGATTTTCTTAATGTTTTGG	19:10493507-10493507+	G
19:10493507-10493507+|ABE|+|A:G|GAA:GGA|nucleotide|(ABE;+;@16;NGG;GAA:GGA;E:G;)	nucleotide mutations; remove mode	TGTGGATTTTCTTAATGTTTTGG	19:10493507-10493507+	G
6:41181769-41181769+|ABE|+|A:G|TAA:TGA|nucleotide|(ABE;+;@13;NG;TAA:TGA;*:*;)	nucleotide mutations; remove mode	TGGTTATGAACTCTGATCTGGG	6:41181769-41181769+	G
19:26810108-26810108-|ABE|+|A:G|TAA:TGA|nucleotide|(ABE;+;@16;NG;TAA:TGA;*:*;)	nucleotide mutations; remove mode	TTTTGAGTCCGAGGCGTATTCG	19:26810108-26810108-	G
5:26121293-26121293+|ABE|+|A:G|GAT:GGT|nucleotide|(ABE;+;@17;NG;GAT:GGT;D:G;)	nucleotide mutations; remove mode	AAGGTCCAGTTTGCTAGATTTG	5:26121293-26121293+	G
5:26121293-26121293+|ABE|+|A:G|GAT:GGT|nucleotide|(ABE;+;@17;NGG;GAT:GGT;D:G;)	nucleotide mutations; remove mode	AAGGTCCAGTTTGCTAGATTTGG	5:26121293-26121293+	G
15:23922164-23922164-|ABE|+|A:G|GAT:GGT|nucleotide|(ABE;+;@14;NG;GAT:GGT;D:G;)	nucleotide mutations; remove mode	GACCAGGTTTCCCAGGTCGCTG	15:23922164-23922164-	G
4:13411930-13411930+|ABE|+|A:G|TAA:TGA|nucleotide|(ABE;+;@16;NG;TAA:TGA;*:*;)	nucleotide mutations; remove mode	AAATGAGCTCATGTTATCCAAG	4:13411930-13411930+	G
6:39098297-39098297+|ABE|+|A:G|TAG:TGG|nucleotide|(ABE;+;@16;NG;TAG:TGG;*:W;)	nucleotide mutations; remove mode	GGGTGGGAGATATTAATATGGG	6:39098297-39098297+	G
6:39098297-39098297+|ABE|+|A:G|TAG:TGG|nucleotide|(ABE;+;@17;NG;TAG:TGG;*:W;)	nucleotide mutations; remove mode	GGTGGGAGATATTAATATGGGG	6:39098297-39098297+	G
6:39098297-39098297+|ABE|+|A:G|TAG:TGG|nucleotide|(ABE;+;@16;NGG;TAG:TGG;*:W;)	nucleotide mutations; remove mode	GGGTGGGAGATATTAATATGGGG	6:39098297-39098297+	G
13:37586391-37586391-|ABE|+|A:G|TAT:TGT|nucleotide|(ABE;+;@16;NG;TAT:TGT;Y:C;)	nucleotide mutations; remove mode	TCTTGTATCACTTCCAATCCTG	13:37586391-37586391-	G
13:37586391-37586391-|ABE|+|A:G|TAT:TGT|nucleotide|(ABE;+;@17;NG;TAT:TGT;Y:C;)	nucleotide mutations; remove mode	CTTGTATCACTTCCAATCCTGG	13:37586391-37586391-	G
13:37586391-37586391-|ABE|+|A:G|TAT:TGT|nucleotide|(ABE;+;@16;NGG;TAT:TGT;Y:C;)	nucleotide mutations; remove mode	TCTTGTATCACTTCCAATCCTGG	13:37586391-37586391-	G
2:21821583-21821583-|ABE|+|A:G|TAT:TGT|nucleotide|(ABE;+;@13;NG;TAT:TGT;Y:C;)	nucleotide mutations; remove mode	GCAATTTGTTTTAGACGCGTTG	2:21821583-21821583-	G
8:50968890-50968890-|ABE|-|T:C|ATT:ACT|nucleotide|(ABE;-;@14;NGG;ATT:ACT;I:T;)	nucleotide mutations; remove mode	ATTTTAGTAGGGTTAAGGTTAGG	8:50968890-50968890-	G
8:50968890-50968890-|ABE|-|T:C|ATT:ACT|nucleotide|(ABE;-;@14;NG;ATT:ACT;I:T;)	nucleotide mutations; remove mode	ATTTTAGTAGGGTTAAGGTTAG	8:50968890-50968890-	G
4:74943011-74943011+|ABE|-|T:C|ATT:ACT|nucleotide|(ABE;-;@16;NGG;ATT:ACT;I:T;)	nucleotide mutations; remove mode	TGCAGTCTCTAGATGGAGCATGG	4:74943011-74943011+	G
4:74943011-74943011+|ABE|-|T:C|ATT:ACT|nucleotide|(ABE;-;@16;NG;ATT:ACT;I:T;)	nucleotide mutations; remove mode	TGCAGTCTCTAGATGGAGCATG	4:74943011-74943011+	G
19:29822400-29822400-|ABE|-|T:C|ATA:ACA|nucleotide|(ABE;-;@16;NGG;ATA:ACA;I:T;)	nucleotide mutations; remove mode	CTTTGTACGGGTGATAAACCAGG	19:29822400-29822400-	G
19:29822400-29822400-|ABE|-|T:C|ATA:ACA|nucleotide|(ABE;-;@17;NG;ATA:ACA;I:T;)	nucleotide mutations; remove mode	TTTGTACGGGTGATAAACCAGG	19:29822400-29822400-	G
19:29822400-29822400-|ABE|-|T:C|ATA:ACA|nucleotide|(ABE;-;@16;NG;ATA:ACA;I:T;)	nucleotide mutations; remove mode	CTTTGTACGGGTGATAAACCAG	19:29822400-29822400-	G
8:14185195-14185195-|ABE|-|T:C|ATA:ACA|nucleotide|(ABE;-;@14;NG;ATA:ACA;I:T;)	nucleotide mutations; remove mode	CAACATGTTCCTCCCTCGCAAG	8:14185195-14185195-	G
9:35901454-35901454+|ABE|-|T:C|GTT:GCT|nucleotide|(ABE;-;@16;NG;GTT:GCT;V:A;)	nucleotide mutations; remove mode	CAGAGCGTTCCCCCGATGCATG	9:35901454-35901454+	G
18:20642278-20642278-|ABE|-|T:C|GTT:GCT|nucleotide|(ABE;-;@13;NGG;GTT:GCT;V:A;)	nucleotide mutations; remove mode	CCACCCAGCAAAACCAAAACAGG	18:20642278-20642278-	G
18:20642278-20642278-|ABE|-|T:C|GTT:GCT|nucleotide|(ABE;-;@14;NG;GTT:GCT;V:A;)	nucleotide mutations; remove mode	CACCCAGCAAAACCAAAACAGG	18:20642278-20642278-	G
18:20642278-20642278-|ABE|-|T:C|GTT:GCT|nucleotide|(ABE;-;@13;NG;GTT:GCT;V:A;)	nucleotide mutations; remove mode	CCACCCAGCAAAACCAAAACAG	18:20642278-20642278-	G
22:10201726-10201726+|ABE|-|T:C|ATA:ACA|nucleotide|(ABE;-;@16;NGG;ATA:ACA;I:T;)	nucleotide mutations; remove mode	GACTGTCACTCCGCGTCCAAGGG	22:10201726-10201726+	G
22:10201726-10201726+|ABE|-|T:C|ATA:ACA|nucleotide|(ABE;-;@17;NG;ATA:ACA;I:T;)	nucleotide mutations; remove mode	ACTGTCACTCCGCGTCCAAGGG	22:10201726-10201726+	G
22:10201726-10201726+|ABE|-|T:C|ATA:ACA|nucleotide|(ABE;-;@16;NG;ATA:ACA;I:T;)	nucleotide mutations; remove mode	GACTGTCACTCCGCGTCCAAGG	22:10201726-10201726+	G
1:1838064-1838064+|ABE|-|T:C|TTA:TCA|nucleotide|(ABE;-;@14;NG;TTA:TCA;L:S;)	nucleotide mutations; remove mode	TACTCTGAACATTTCTTGAACG	1:1838064-1838064+	G
5:39099072-39099072+|ABE|-|T:C|CTG:CCG|nucleotide|(ABE;-;@15;NG;CTG:CCG;L:P;)	nucleotide mutations; remove mode	TGCACGGCGGGCGGGCGGCGCG	5:39099072-39099072+	G
5:39099072-39099072+|ABE|-|T:C|CTG:CCG|nucleotide|(ABE;-;@13;NG;CTG:CCG;L:P;)	nucleotide mutations; remove mode	TGTGCACGGCGGGCGGGCGGCG	5:39099072-39099072+	G
1:50921166-50921166+|ABE|-|T:C|GTA:GCA|nucleotide|(ABE;-;@13;NG;GTA:GCA;V:A;)	nucleotide mutations; remove mode	GACGACTGCTCTAGCCAATCAG	1:50921166-50921166+	G
23:28494101-28494101+|Target-AID|-|G:A|TGT:TAT|nucleotide|(Target-AID;-;@17;NGG;TGT:TAT;C:Y;)	nucleotide mutations; remove mode	GCATAATGCTGCCATAGGTGGGG	23:28494101-28494101+	T
23:28494101-28494101+|Target-AID|-|G:A|TGT:TAT|nucleotide|(Target-AID;-;@17;NG;TGT:TAT;C:Y;)	nucleotide mutations; remove mode	GCATAATGCTGCCATAGGTGGG	23:28494101-28494101+	T
23:7548697-7548697+|Target-AID|-|G:A|GGA:GAA|nucleotide|(Target-AID;-;@18;NG;GGA:GAA;G:E;)	nucleotide mutations; remove mode	TTTCCTGCCACAACAACGCAAG	23:7548697-7548697+	T
20:31309264-31309264-|Target-AID|-|G:A|GGA:GAA|nucleotide|(Target-AID;-;@18;NGG;GGA:GAA;G:E;)	nucleotide mutations; remove mode	TTTCCCCATAAACATGTGTTTGG	20:31309264-31309264-	T
20:31309264-31309264-|Target-AID|-|G:A|GGA:GAA|nucleotide|(Target-AID;-;@18;NG;GGA:GAA;G:E;)	nucleotide mutations; remove mode	TTTCCCCATAAACATGTGTTTG	20:31309264-31309264-	T
8:26059577-26059577+|Target-AID|-|G:A|GGA:GAA|nucleotide|(Target-AID;-;@17;NG;GGA:GAA;G:E;)	nucleotide mutations; remove mode	TCTTCCGCAGATATAAATAAGG	8:26059577-26059577+	T
14:8456770-8456770+|Target-AID|-|G:A|GGT:GAT|nucleotide|(Target-AID;-;@19;NG;GGT:GAT;G:D;)	nucleotide mutations; remove mode	ATCACTATTATAAATAATTATG	14:8456770-8456770+	T
4:11464155-11464155+|Target-AID|-|G:A|GGT:GAT|nucleotide|(Target-AID;-;@18;NGG;GGT:GAT;G:D;)	nucleotide mutations; remove mode	GATCACCTGCATGGGGATTTTGG	4:11464155-11464155+	T
4:11464155-11464155+|Target-AID|-|G:A|GGT:GAT|nucleotide|(Target-AID;-;@19;NG;GGT:GAT;G:D;)	nucleotide mutations; remove mode	ATCACCTGCATGGGGATTTTGG	4:11464155-11464155+	T
4:11464155-11464155+|Target-AID|-|G:A|GGT:GAT|nucleotide|(Target-AID;-;@18;NG;GGT:GAT;G:D;)	nucleotide mutations; remove mode	GATCACCTGCATGGGGATTTTG	4:11464155-11464155+	T
5:60886003-60886003+|Target-AID|-|G:A|CGT:CAT|nucleotide|(Target-AID;-;@19;NG;CGT:CAT;R:H;)	nucleotide mutations; remove mode	ATGCAACATTACAAAGGCTGTG	5:60886003-60886003+	T
17:29797776-29797776-|Target-AID|-|G:A|AGG:AAG|nucleotide|(Target-AID;-;@18;NGG;AGG:AAG;R:K;)	nucleotide mutations; remove mode	GCTTGCTGATGTCCACCAGGTGG	17:29797776-29797776-	T
17:29797776-29797776-|Target-AID|-|G:A|AGG:AAG|nucleotide|(Target-AID;-;@18;NG;AGG:AAG;R:K;)	nucleotide mutations; remove mode	GCTTGCTGATGTCCACCAGGTG	17:29797776-29797776-	T
16:46724987-46724987+|Target-AID|-|G:A|CGG:CAG|nucleotide|(Target-AID;-;@18;NGG;CGG:CAG;R:Q;)	nucleotide mutations; remove mode	GCTGTGTAGGGCTTCCGTACAGG	16:46724987-46724987+	T
16:46724987-46724987+|Target-AID|-|G:A|CGG:CAG|nucleotide|(Target-AID;-;@18;NG;CGG:CAG;R:Q;)	nucleotide mutations; remove mode	GCTGTGTAGGGCTTCCGTACAG	16:46724987-46724987+	T
9:22359819-22359819+|Target-AID|+|C:T|CCT:CTT|nucleotide|(Target-AID;+;@17;NG;CCT:CTT;P:L;)	nucleotide mutations; remove mode	TGCTTTAGAACAATAAAATTAG	9:22359819-22359819+	T
24:26481200-26481200-|Target-AID|+|C:T|CCG:CTG|nucleotide|(Target-AID;+;@17;NG;CCG:CTG;P:L;)	nucleotide mutations; remove mode	TACTGGGAAATAAAATGGAAAG	24:26481200-26481200-	T
19:7072754-7072754+|Target-AID|+|C:T|TCC:TTC|nucleotide|(Target-AID;+;@19;NG;TCC:TTC;S:F;)	nucleotide mutations; remove mode	TTCTGACGTTGCATCAGCTCTG	19:7072754-7072754+	T
19:7072754-7072754+|Target-AID|+|C:T|TCC:TTC|nucleotide|(Target-AID;+;@19;NGG;TCC:TTC;S:F;)	nucleotide mutations; remove mode	TTCTGACGTTGCATCAGCTCTGG	19:7072754-7072754+	T
22:36741246-36741246-|Target-AID|+|C:T|CCG:CTG|nucleotide|(Target-AID;+;@18;NG;CCG:CTG;P:L;)	nucleotide mutations; remove mode	CCTGTCTTTCAATAATGTCTTG	22:36741246-36741246-	T
7:38349567-38349567+|Target-AID|+|C:T|CCA:CTA|nucleotide|(Target-AID;+;@18;NG;CCA:CTA;P:L;)	nucleotide mutations; remove mode	CCTACCAAAGGGGGCGTTCATG	7:38349567-38349567+	T
1:312684-312684-|Target-AID|+|C:T|TCC:TTC|nucleotide|(Target-AID;+;@18;NG;TCC:TTC;S:F;)	nucleotide mutations; remove mode	ATTCTTGACAAAAGAATAAATG	1:312684-312684-	T
20:27384038-27384038-|Target-AID|+|C:T|TCC:TTC|nucleotide|(Target-AID;+;@18;NG;TCC:TTC;S:F;)	nucleotide mutations; remove mode	TTTCCATATGCAAAAAAAACTG	20:27384038-27384038-	T
23:21521406-21521406-|Target-AID|+|C:T|TCC:TTC|nucleotide|(Target-AID;+;@19;NG;TCC:TTC;S:F;)	nucleotide mutations; remove mode	TTCTTTATTTCAAAGTTTTTTG	23:21521406-21521406-	T
14:32185362-32185362-|Target-AID|+|C:T|TCC:TTC|nucleotide|(Target-AID;+;@19;NG;TCC:TTC;S:F;)	nucleotide mutations; remove mode	TTCAGGACGACACCAAACATAG	14:32185362-32185362-	T
17:19607287-19607287-|Target-AID|+|C:T|TCC:TTC|nucleotide|(Target-AID;+;@18;NG;TCC:TTC;S:F;)	nucleotide mutations; remove mode	TTTCTCCAGTGACCGCTAGAGG	17:19607287-19607287-	T
16:44678202-44678202+|Target-AID|+|C:T|ACG:ATG|nucleotide|(Target-AID;+;@17;NG;ACG:ATG;T:M;)	nucleotide mutations; remove mode	ACATGATGCTGCTCGAAGGAGG	16:44678202-44678202+	T
11:13528337-13528337+|Target-AID|+|C:T|TCA:TTA|nucleotide|(Target-AID;+;@17;NG;TCA:TTA;S:L;)	nucleotide mutations; remove mode	ACTTATTCACGGGTCGGGGAGG	11:13528337-13528337+	T
11:8129580-8129580+|Target-AID|+|C:T|ACC:ATC|nucleotide|(Target-AID;+;@18;NG;ACC:ATC;T:I;)	nucleotide mutations; remove mode	AATCAATACATTCTCCTTGGTG	11:8129580-8129580+	T
11:8129580-8129580+|Target-AID|+|C:T|ACC:ATC|nucleotide|(Target-AID;+;@19;NG;ACC:ATC;T:I;)	nucleotide mutations; remove mode	ATCAATACATTCTCCTTGGTGG	11:8129580-8129580+	T
11:8129580-8129580+|Target-AID|+|C:T|ACC:ATC|nucleotide|(Target-AID;+;@18;NGG;ACC:ATC;T:I;)	nucleotide mutations; remove mode	AATCAATACATTCTCCTTGGTGG	11:8129580-8129580+	T

## Sheet: Equus caballus
guide: id	mutation format; mode of mutagenesis	guide+PAM sequence	genome coordinate	nucleotide mutation	transcript: id	amino acid mutation	aminoacid: position
ENSECAT00000000037|5|-|4455721|4455766|20|(ABE;-;@15;NGG;GTG:GCG;V:A;)	amino acid mutations; create mode	GCTCCACTTTATCGAGGACCCGG			ENSECAT00000000037	A	20
ENSECAT00000000037|5|-|4455721|4455766|20|(ABE;-;@16;NG;GTG:GCG;V:A;)	amino acid mutations; create mode	CTCCACTTTATCGAGGACCCGG			ENSECAT00000000037	A	20
ENSECAT00000000037|5|-|4455721|4455766|20|(ABE;-;@15;NG;GTG:GCG;V:A;)	amino acid mutations; create mode	GCTCCACTTTATCGAGGACCCG			ENSECAT00000000037	A	20
ENSECAT00000000070|29|-|18845070|18845115|8|(ABE;-;@13;NGG;GTC:GCC;V:A;)	amino acid mutations; create mode	GGTTTGGACTTTCCCACTTAAGG			ENSECAT00000000070	A	8
ENSECAT00000000070|29|-|18845070|18845115|8|(ABE;-;@17;NG;GTC:GCC;V:A;)	amino acid mutations; create mode	TGGACTTTCCCACTTAAGGAAG			ENSECAT00000000070	A	8
ENSECAT00000000070|29|-|18845070|18845115|8|(ABE;-;@14;NG;GTC:GCC;V:A;)	amino acid mutations; create mode	GTTTGGACTTTCCCACTTAAGG			ENSECAT00000000070	A	8
ENSECAT00000000070|29|-|18845070|18845115|8|(ABE;-;@13;NG;GTC:GCC;V:A;)	amino acid mutations; create mode	GGTTTGGACTTTCCCACTTAAG			ENSECAT00000000070	A	8
ENSECAT00000000103|25|+|16402722|16402767|28|(ABE;-;@17;NG;GTC:GCC;V:A;)	amino acid mutations; create mode	AGGACCTTGCTCTGTTCACTCG			ENSECAT00000000103	A	28
ENSECAT00000000178|17|-|774516|774561|4|(Target-AID;+;@17;NG;CGT:TGT;R:C;)	amino acid mutations; create mode	AAACGTTCAGTGGGAAGATTAG			ENSECAT00000000178	C	4
ENSECAT00000000247|1|+|148440224|148440269|20|(Target-AID;+;@17;NG;TGC:TGT;C:C;)	amino acid mutations; create mode	GTGCCGGCTGTCGGGCAGCGTG			ENSECAT00000000247	C	20
ENSECAT00000000310|25|-|24345807|24345852|61|(Target-AID;+;@18;NG;GAC:GAT;D:D;)	amino acid mutations; create mode	GACTTTGAAAATGTAAGTGGAG			ENSECAT00000000310	D	61
ENSECAT00000000319|22|+|17249699|17249744|28|(Target-AID;+;@18;NG;GAC:GAT;D:D;)	amino acid mutations; create mode	GACATCACATTGAGAGTGTCCG			ENSECAT00000000319	D	28
ENSECAT00000000319|22|+|17249699|17249744|28|(Target-AID;+;@19;NG;GAC:GAT;D:D;)	amino acid mutations; create mode	ACATCACATTGAGAGTGTCCGG			ENSECAT00000000319	D	28
ENSECAT00000000319|22|+|17249699|17249744|28|(Target-AID;+;@18;NGG;GAC:GAT;D:D;)	amino acid mutations; create mode	GACATCACATTGAGAGTGTCCGG			ENSECAT00000000319	D	28
ENSECAT00000000425|10|+|3742179|3742224|9|(Target-AID;-;@17;NG;GGA:GAA;G:E;)	amino acid mutations; create mode	ATTCCTTTTCTTTGTCTGATGG			ENSECAT00000000425	E	9
ENSECAT00000000452|6|+|33940264|33940309|49|(Target-AID;-;@17;NG;GAG:GAA;E:E;)	amino acid mutations; create mode	GTACTCCTTTTCCTCGTCCTGG			ENSECAT00000000452	E	49
ENSECAT00000000662|15|-|28593021|28593066|28|(ABE;+;@15;NG;GGA:GGG;G:G;)	amino acid mutations; create mode	AAGGGACCCCTGTTGACCCCTG			ENSECAT00000000662	G	28
ENSECAT00000000696|2|+|118124285|118124330|9|(ABE;+;@15;NG;GAC:GGC;D:G;)	amino acid mutations; create mode	CAAGGACTCGTCCCGCTGCCTG			ENSECAT00000000696	G	9
ENSECAT00000000697|23|+|38622627|38622672|6|(Target-AID;-;@17;NGG;GGG:GGA;G:G;)	amino acid mutations; create mode	TGGCCCTTTGTCTGCTATCATGG			ENSECAT00000000697	G	6
ENSECAT00000000697|23|+|38622627|38622672|6|(Target-AID;-;@17;NG;GGG:GGA;G:G;)	amino acid mutations; create mode	TGGCCCTTTGTCTGCTATCATG			ENSECAT00000000697	G	6
ENSECAT00000000729|4|-|87207279|87207324|24|(Target-AID;+;@18;NG;GGC:GGT;G:G;)	amino acid mutations; create mode	GGCATCCGGGTGAGTGACAGTG			ENSECAT00000000729	G	24
ENSECAT00000000729|4|-|87207279|87207324|24|(Target-AID;+;@19;NG;GGC:GGT;G:G;)	amino acid mutations; create mode	GCATCCGGGTGAGTGACAGTGG			ENSECAT00000000729	G	24
ENSECAT00000000729|4|-|87207279|87207324|24|(Target-AID;+;@18;NGG;GGC:GGT;G:G;)	amino acid mutations; create mode	GGCATCCGGGTGAGTGACAGTGG			ENSECAT00000000729	G	24
ENSECAT00000000729|4|-|87207279|87207324|24|(Target-AID;+;@19;NGG;GGC:GGT;G:G;)	amino acid mutations; create mode	GCATCCGGGTGAGTGACAGTGGG			ENSECAT00000000729	G	24
ENSECAT00000000740|6|+|70566527|70566572|82|(ABE;+;@15;NG;GAG:GGG;E:G;)	amino acid mutations; create mode	GAAGGAGGCCATGCAAGACCTG			ENSECAT00000000740	G	82
ENSECAT00000000762|16|-|17418749|17418794|9|(Target-AID;+;@17;NG;GGC:GGT;G:G;)	amino acid mutations; create mode	AGGCTATTTTATTTTCAAACTG			ENSECAT00000000762	G	9
ENSECAT00000000762|16|-|17418749|17418794|9|(Target-AID;+;@18;NG;GGC:GGT;G:G;)	amino acid mutations; create mode	GGCTATTTTATTTTCAAACTGG			ENSECAT00000000762	G	9
ENSECAT00000000762|16|-|17418749|17418794|9|(Target-AID;+;@17;NGG;GGC:GGT;G:G;)	amino acid mutations; create mode	AGGCTATTTTATTTTCAAACTGG			ENSECAT00000000762	G	9
ENSECAT00000000962|1|+|48770354|48770399|22|(Target-AID;+;@18;NG;ACT:ATT;T:I;)	amino acid mutations; create mode	GACTGTTGAAGTGACAACAAAG			ENSECAT00000000962	I	22
ENSECAT00000000962|1|+|48770354|48770399|22|(Target-AID;+;@19;NG;ACT:ATT;T:I;)	amino acid mutations; create mode	ACTGTTGAAGTGACAACAAAGG			ENSECAT00000000962	I	22
ENSECAT00000000962|1|+|48770354|48770399|22|(Target-AID;+;@18;NGG;ACT:ATT;T:I;)	amino acid mutations; create mode	GACTGTTGAAGTGACAACAAAGG			ENSECAT00000000962	I	22
ENSECAT00000000996|11|+|3063922|3063967|6|(Target-AID;+;@18;NG;ATC:ATT;I:I;)	amino acid mutations; create mode	ATCAAGTCTGGCGAGGCCGCCG			ENSECAT00000000996	I	6
ENSECAT00000001006|7|+|31086975|31087020|81|(Target-AID;-;@18;NG;ATG:ATA;M:I;)	amino acid mutations; create mode	AGCATTTTGGGGGTTATGACAG			ENSECAT00000001006	I	81
ENSECAT00000001021|18|+|6005722|6005767|16|(Target-AID;+;@17;NG;ACA:ATA;T:I;)	amino acid mutations; create mode	AAACACCAGAAAAAGAACTAAG			ENSECAT00000001021	I	16
ENSECAT00000001057|7|-|50618649|50618694|81|(Target-AID;-;@17;NGG;ATG:ATA;M:I;)	amino acid mutations; create mode	CAGCATCTTTGGGACAGTGGTGG			ENSECAT00000001057	I	81
ENSECAT00000001057|7|-|50618649|50618694|81|(Target-AID;-;@18;NG;ATG:ATA;M:I;)	amino acid mutations; create mode	AGCATCTTTGGGACAGTGGTGG			ENSECAT00000001057	I	81
ENSECAT00000001057|7|-|50618649|50618694|81|(Target-AID;-;@17;NG;ATG:ATA;M:I;)	amino acid mutations; create mode	CAGCATCTTTGGGACAGTGGTG			ENSECAT00000001057	I	81
ENSECAT00000001225|16|+|81591250|81591295|13|(Target-AID;-;@19;NGG;AGA:AAA;R:K;)	amino acid mutations; create mode	TCTTTTAATACCCTCTTCAGTGG			ENSECAT00000001225	K	13
ENSECAT00000001225|16|+|81591250|81591295|13|(Target-AID;-;@19;NG;AGA:AAA;R:K;)	amino acid mutations; create mode	TCTTTTAATACCCTCTTCAGTG			ENSECAT00000001225	K	13
ENSECAT00000001225|16|+|81591250|81591295|13|(Target-AID;-;@17;NG;AGA:AAA;R:K;)	amino acid mutations; create mode	ATTCTTTTAATACCCTCTTCAG			ENSECAT00000001225	K	13
ENSECAT00000001237|22|-|26594222|26594267|21|(Target-AID;-;@19;NGG;GAG:AAG;E:K;)	amino acid mutations; create mode	TCTTTCTCCGGCAGCGGCGCGGG			ENSECAT00000001237	K	21
ENSECAT00000001237|22|-|26594222|26594267|21|(Target-AID;-;@18;NGG;GAG:AAG;E:K;)	amino acid mutations; create mode	CTCTTTCTCCGGCAGCGGCGCGG			ENSECAT00000001237	K	21
ENSECAT00000001237|22|-|26594222|26594267|21|(Target-AID;-;@19;NG;GAG:AAG;E:K;)	amino acid mutations; create mode	TCTTTCTCCGGCAGCGGCGCGG			ENSECAT00000001237	K	21
ENSECAT00000001237|22|-|26594222|26594267|21|(Target-AID;-;@18;NG;GAG:AAG;E:K;)	amino acid mutations; create mode	CTCTTTCTCCGGCAGCGGCGCG			ENSECAT00000001237	K	21
ENSECAT00000001295|11|-|47054111|47054156|81|(Target-AID;-;@18;NG;TTG:TTA;L:L;)	amino acid mutations; create mode	AACAACTTGGGAATGGTCACAG			ENSECAT00000001295	L	81
ENSECAT00000001324|1|+|157443269|157443314|3|(Target-AID;-;@18;NG;CTG:CTA;L:L;)	amino acid mutations; create mode	GTCAGCTTCATTTTACCTAGAG			ENSECAT00000001324	L	3
ENSECAT00000001441|14|-|51931757|51931802|15|(Target-AID;-;@19;NG;CTG:CTA;L:L;)	amino acid mutations; create mode	GCAGCTTCGCATACCGCGAGCG			ENSECAT00000001441	L	15
ENSECAT00000001441|14|-|51931757|51931802|15|(Target-AID;-;@17;NG;CTG:CTA;L:L;)	amino acid mutations; create mode	CGGCAGCTTCGCATACCGCGAG			ENSECAT00000001441	L	15
ENSECAT00000001441|14|-|51931757|51931802|15|(Target-AID;+;@18;NG;CTG:TTG;L:L;)	amino acid mutations; create mode	AGCTGCCGCGGGGTGACTTTTG			ENSECAT00000001441	L	15
ENSECAT00000001745|20|-|26388757|26388802|5|(ABE;-;@13;NG;AAT:AAC;N:N;)	amino acid mutations; create mode	AGCTTGCATTTTTCTCTTCCAG			ENSECAT00000001745	N	5
ENSECAT00000001974|14|-|62790575|62790620|13|(ABE;-;@16;NG;CTG:CCG;L:P;)	amino acid mutations; create mode	CACCAGCTTCCTGCTCGTGCTG			ENSECAT00000001974	P	13
ENSECAT00000002006|7|-|32447892|32447937|81|(ABE;-;@17;NG;CTG:CCG;L:P;)	amino acid mutations; create mode	AACAGTTTTGGGGTGATGACAG			ENSECAT00000002006	P	81
ENSECAT00000002150|5|-|47417887|47417932|6|(Target-AID;-;@17;NGG;CAG:CAA;Q:Q;)	amino acid mutations; create mode	GGTCTGCTTAGTACGGGCCATGG			ENSECAT00000002150	Q	6
ENSECAT00000002150|5|-|47417887|47417932|6|(Target-AID;-;@18;NG;CAG:CAA;Q:Q;)	amino acid mutations; create mode	GTCTGCTTAGTACGGGCCATGG			ENSECAT00000002150	Q	6
ENSECAT00000002150|5|-|47417887|47417932|6|(Target-AID;-;@17;NG;CAG:CAA;Q:Q;)	amino acid mutations; create mode	GGTCTGCTTAGTACGGGCCATG			ENSECAT00000002150	Q	6
ENSECAT00000002438|5|-|48229664|48229709|106|(Target-AID;-;@17;NG;CGG:CGA;R:R;)	amino acid mutations; create mode	CTTCCGCTTCTCCTCCATGCGG			ENSECAT00000002438	R	106
ENSECAT00000002563|1|-|114428863|114428908|26|(Target-AID;+;@19;NG;AGC:AGT;S:S;)	amino acid mutations; create mode	GCAACGTGAGCAGCTGCGCTCG			ENSECAT00000002563	S	26
ENSECAT00000002563|1|-|114428863|114428908|26|(Target-AID;+;@19;NGG;AGC:AGT;S:S;)	amino acid mutations; create mode	GCAACGTGAGCAGCTGCGCTCGG			ENSECAT00000002563	S	26
ENSECAT00000002634|7|-|51234969|51235014|81|(ABE;-;@16;NGG;ATG:ACG;M:T;)	amino acid mutations; create mode	TAGCATCTTTGGGATAGTGGTGG			ENSECAT00000002634	T	81
ENSECAT00000002634|7|-|51234969|51235014|81|(ABE;-;@17;NG;ATG:ACG;M:T;)	amino acid mutations; create mode	AGCATCTTTGGGATAGTGGTGG			ENSECAT00000002634	T	81
ENSECAT00000002634|7|-|51234969|51235014|81|(ABE;-;@16;NG;ATG:ACG;M:T;)	amino acid mutations; create mode	TAGCATCTTTGGGATAGTGGTG			ENSECAT00000002634	T	81
ENSECAT00000002662|7|-|31512045|31512090|81|(ABE;-;@17;NG;ATG:ACG;M:T;)	amino acid mutations; create mode	AGCATTTTGGGAGTAATGACAG			ENSECAT00000002662	T	81
ENSECAT00000002701|X|+|64314595|64314640|8|(ABE;-;@17;NG;ATT:ACT;I:T;)	amino acid mutations; create mode	CCAATTTTGGCATTTCCTGAAG			ENSECAT00000002701	T	8
ENSECAT00000002717|6|-|38416680|38416725|35|(ABE;-;@16;NG;ACT:ACC;T:T;)	amino acid mutations; create mode	CATCAGTTTTCCCAGGTCTTTG			ENSECAT00000002717	T	35
ENSECAT00000002762|17|+|7358165|7358210|8|(ABE;+;@17;NG;ACA:ACG;T:T;)	amino acid mutations; create mode	GACAGCCCTGGAAATGGTCCAG			ENSECAT00000002762	T	8
ENSECAT00000002762|17|+|7358165|7358210|8|(ABE;+;@17;NGG;ACA:ACG;T:T;)	amino acid mutations; create mode	GACAGCCCTGGAAATGGTCCAGG			ENSECAT00000002762	T	8
ENSECAT00000002770|5|+|40053379|40053424|7|(ABE;-;@13;NGG;ATC:ACC;I:T;)	amino acid mutations; create mode	GTGCTGGATCTTACAGGTCAGGG			ENSECAT00000002770	T	7
ENSECAT00000002770|5|+|40053379|40053424|7|(ABE;-;@14;NG;ATC:ACC;I:T;)	amino acid mutations; create mode	TGCTGGATCTTACAGGTCAGGG			ENSECAT00000002770	T	7
ENSECAT00000002770|5|+|40053379|40053424|7|(ABE;-;@13;NG;ATC:ACC;I:T;)	amino acid mutations; create mode	GTGCTGGATCTTACAGGTCAGG			ENSECAT00000002770	T	7
ENSECAT00000002783|1|+|60118584|60118629|34|(Target-AID;-;@17;NGG;GCC:ACC;A:T;)	amino acid mutations; create mode	GGGCTTTCCGTGGTGGGGCAAGG			ENSECAT00000002783	T	34
ENSECAT00000002783|1|+|60118584|60118629|34|(Target-AID;-;@18;NG;GCC:ACC;A:T;)	amino acid mutations; create mode	GGCTTTCCGTGGTGGGGCAAGG			ENSECAT00000002783	T	34
ENSECAT00000002783|1|+|60118584|60118629|34|(Target-AID;-;@17;NG;GCC:ACC;A:T;)	amino acid mutations; create mode	GGGCTTTCCGTGGTGGGGCAAG			ENSECAT00000002783	T	34
ENSECAT00000002806|7|-|31591544|31591589|79|(ABE;+;@17;NG;ATG:GTG;M:V;)	amino acid mutations; create mode	AAGATGCTATTATACCTTTCAG			ENSECAT00000002806	V	79
ENSECAT00000002806|7|-|31591544|31591589|79|(ABE;+;@17;NGG;ATG:GTG;M:V;)	amino acid mutations; create mode	AAGATGCTATTATACCTTTCAGG			ENSECAT00000002806	V	79
ENSECAT00000002829|15|+|11612854|11612899|23|(Target-AID;+;@18;NG;GCT:GTT;A:V;)	amino acid mutations; create mode	GGCTGGCTTTGCAGGAGACCAG			ENSECAT00000002829	V	23
ENSECAT00000002853|7|-|31603808|31603853|79|(ABE;+;@17;NG;ATG:GTG;M:V;)	amino acid mutations; create mode	AAGATGCTATTCTATCTCTCTG			ENSECAT00000002853	V	79
ENSECAT00000002853|7|-|31603808|31603853|79|(ABE;+;@17;NGG;ATG:GTG;M:V;)	amino acid mutations; create mode	AAGATGCTATTCTATCTCTCTGG			ENSECAT00000002853	V	79
ENSECAT00000002933|7|+|76166448|76166493|81|(Target-AID;+;@17;NG;GCC:GTC;A:V;)	amino acid mutations; create mode	AGGCCATCGTGGATTTTCTGCG			ENSECAT00000002933	V	81
ENSECAT00000003367|24|-|11711537|11711582|4|(Target-AID;+;@18;NG;CAG:TAG;Q:*;)	amino acid mutations; create mode	AGCAGTACGATGTGCTATTCCG			ENSECAT00000003367	*	4
ENSECAT00000003367|24|-|11711537|11711582|4|(Target-AID;+;@19;NG;CAG:TAG;Q:*;)	amino acid mutations; create mode	GCAGTACGATGTGCTATTCCGG			ENSECAT00000003367	*	4
ENSECAT00000003367|24|-|11711537|11711582|4|(Target-AID;+;@18;NGG;CAG:TAG;Q:*;)	amino acid mutations; create mode	AGCAGTACGATGTGCTATTCCGG			ENSECAT00000003367	*	4
ENSECAT00000000034|20|-|4528771|4528816|52|(Target-AID;-;@18;NG;GCA:ACA;A:T;)	amino acid mutations; remove mode	TGTCTTACCACCTGCTGGGCTG			ENSECAT00000000034	T	52
ENSECAT00000000041|28|+|18262449|18262494|4|(Target-AID;-;@19;NGG;GCA:ACA;A:T;)	amino acid mutations; remove mode	GTCTTCCCCATGCAGCTAAGAGG			ENSECAT00000000041	T	4
ENSECAT00000000041|28|+|18262449|18262494|4|(Target-AID;-;@19;NG;GCA:ACA;A:T;)	amino acid mutations; remove mode	GTCTTCCCCATGCAGCTAAGAG			ENSECAT00000000041	T	4
ENSECAT00000000118|25|-|24458728|24458773|68|(ABE;+;@14;NG;GCA:GCG;A:A;)	amino acid mutations; remove mode	TAAGGCGACGGCTCCCACGACG			ENSECAT00000000118	A	68
ENSECAT00000000118|25|-|24458728|24458773|68|(ABE;+;@17;NG;GCA:GCG;A:A;)	amino acid mutations; remove mode	GGCGACGGCTCCCACGACGCCG			ENSECAT00000000118	A	68
ENSECAT00000000118|25|-|24458728|24458773|68|(ABE;+;@17;NGG;GCA:GCG;A:A;)	amino acid mutations; remove mode	GGCGACGGCTCCCACGACGCCGG			ENSECAT00000000118	A	68
ENSECAT00000000178|17|-|774516|774561|4|(ABE;-;@15;NG;TGT:CGT;C:R;)	amino acid mutations; remove mode	TGAACGTTTATCCATGCCAAAG			ENSECAT00000000178	R	4
ENSECAT00000000247|1|+|148440224|148440269|20|(ABE;-;@17;NGG;TGT:TGC;C:C;)	amino acid mutations; remove mode	CCGGCACTTCTGGAAGAGCCTGG			ENSECAT00000000247	C	20
ENSECAT00000000247|1|+|148440224|148440269|20|(ABE;-;@17;NG;TGT:TGC;C:C;)	amino acid mutations; remove mode	CCGGCACTTCTGGAAGAGCCTG			ENSECAT00000000247	C	20
ENSECAT00000000324|7|-|3946514|3946559|21|(Target-AID;-;@19;NGG;GAC:AAC;D:N;)	amino acid mutations; remove mode	TTTCTGGAGTGGGCAAGAAGAGG			ENSECAT00000000324	N	21
ENSECAT00000000324|7|-|3946514|3946559|21|(Target-AID;-;@19;NG;GAC:AAC;D:N;)	amino acid mutations; remove mode	TTTCTGGAGTGGGCAAGAAGAG			ENSECAT00000000324	N	21
ENSECAT00000000381|7|+|18951449|18951494|45|(Target-AID;-;@17;NG;GAG:GAA;E:E;)	amino acid mutations; remove mode	TACTTCTTTGTTTCCATGGCTG			ENSECAT00000000381	E	45
ENSECAT00000000420|6|+|34370300|34370345|20|(Target-AID;-;@19;NGG;GAG:GAA;E:E;)	amino acid mutations; remove mode	CTTCCTTTTCCAGATCATCCGGG			ENSECAT00000000420	E	20
ENSECAT00000000420|6|+|34370300|34370345|20|(Target-AID;-;@18;NGG;GAG:GAA;E:E;)	amino acid mutations; remove mode	TCTTCCTTTTCCAGATCATCCGG			ENSECAT00000000420	E	20
ENSECAT00000000420|6|+|34370300|34370345|20|(Target-AID;-;@19;NG;GAG:GAA;E:E;)	amino acid mutations; remove mode	CTTCCTTTTCCAGATCATCCGG			ENSECAT00000000420	E	20
ENSECAT00000000420|6|+|34370300|34370345|20|(Target-AID;-;@18;NG;GAG:GAA;E:E;)	amino acid mutations; remove mode	TCTTCCTTTTCCAGATCATCCG			ENSECAT00000000420	E	20
ENSECAT00000000428|20|+|16977373|16977418|10|(Target-AID;-;@19;NG;GAA:AAA;E:K;)	amino acid mutations; remove mode	TTCTTTGTCCTCCCCCGTGGAG			ENSECAT00000000428	K	10
ENSECAT00000000430|20|+|36596274|36596319|15|(ABE;+;@14;NG;GAA:GAG;E:E;)	amino acid mutations; remove mode	CAAGGAGCGCGAGGTGCAGCGG			ENSECAT00000000430	E	15
ENSECAT00000000452|6|+|33940264|33940309|49|(ABE;+;@14;NG;GAA:GAG;E:E;)	amino acid mutations; remove mode	AAAGGAGTACTACGAGGCCAAG			ENSECAT00000000452	E	49
ENSECAT00000000480|16|-|1490906|1490951|4|(Target-AID;-;@19;NG;GAA:AAA;E:K;)	amino acid mutations; remove mode	TTCTTCAGCATGGTGGTGCCAG			ENSECAT00000000480	K	4
ENSECAT00000000496|22|+|20064686|20064731|69|(ABE;+;@14;NG;GAA:GAG;E:E;)	amino acid mutations; remove mode	CAAGGAGGTGTTCAAGGTGAGG			ENSECAT00000000496	E	69
ENSECAT00000000496|22|+|20064686|20064731|69|(ABE;+;@15;NG;GAA:GAG;E:E;)	amino acid mutations; remove mode	AAGGAGGTGTTCAAGGTGAGGG			ENSECAT00000000496	E	69
ENSECAT00000000496|22|+|20064686|20064731|69|(ABE;+;@16;NG;GAA:GAG;E:E;)	amino acid mutations; remove mode	AGGAGGTGTTCAAGGTGAGGGG			ENSECAT00000000496	E	69
ENSECAT00000000496|22|+|20064686|20064731|69|(ABE;+;@14;NGG;GAA:GAG;E:E;)	amino acid mutations; remove mode	CAAGGAGGTGTTCAAGGTGAGGG			ENSECAT00000000496	E	69
ENSECAT00000000496|22|+|20064686|20064731|69|(ABE;+;@15;NGG;GAA:GAG;E:E;)	amino acid mutations; remove mode	AAGGAGGTGTTCAAGGTGAGGGG			ENSECAT00000000496	E	69
ENSECAT00000000700|21|-|23799939|23799984|11|(Target-AID;-;@18;NG;GGG:AGG;G:R;)	amino acid mutations; remove mode	CCTTTTCATACATCCTTCGCTG			ENSECAT00000000700	R	11
ENSECAT00000000729|4|-|87207279|87207324|24|(ABE;-;@13;NG;GGT:GGC;G:G;)	amino acid mutations; remove mode	CCCGGATGCCCTTCACACGGTG			ENSECAT00000000729	G	24
ENSECAT00000000765|20|-|31552757|31552802|6|(Target-AID;-;@18;NG;GGG:GGA;G:G;)	amino acid mutations; remove mode	ATTCCCTTAGCAGCAGCCATGG			ENSECAT00000000765	G	6
ENSECAT00000000766|6|+|22797531|22797576|41|(Target-AID;-;@17;NG;GGC:AGC;G:S;)	amino acid mutations; remove mode	TGCTTTTGTTGGGCATGTTGGG			ENSECAT00000000766	S	41
ENSECAT00000000857|20|-|36020915|36020960|26|(ABE;+;@16;NG;CAC:CGC;H:R;)	amino acid mutations; remove mode	AAGCGCGACGTGTACAATGAGG			ENSECAT00000000857	R	26
ENSECAT00000000873|20|+|31355939|31355984|54|(ABE;-;@16;NG;CAT:CAC;H:H;)	amino acid mutations; remove mode	TGAAGTGCTTCTGGGGGTGCTG			ENSECAT00000000873	H	54
ENSECAT00000000996|11|+|3063922|3063967|6|(ABE;-;@17;NG;ATT:ATC;I:I;)	amino acid mutations; remove mode	CTTGATCTTCACCGCCTGCATG			ENSECAT00000000996	I	6
ENSECAT00000000996|11|+|3063922|3063967|6|(ABE;-;@13;NG;ATT:ATC;I:I;)	amino acid mutations; remove mode	CAGACTTGATCTTCACCGCCTG			ENSECAT00000000996	I	6
ENSECAT00000001009|1|-|144494434|144494479|27|(ABE;+;@15;NG;ATT:GTT;I:V;)	amino acid mutations; remove mode	CGAAGGTTCAGGTTTACTCACG			ENSECAT00000001009	V	27
ENSECAT00000001031|7|-|31107952|31107997|85|(ABE;+;@16;NG;ATC:GTC;I:V;)	amino acid mutations; remove mode	CAAGGTCATGGCAGGCCTCCTG			ENSECAT00000001031	V	85
ENSECAT00000001051|6|+|25683284|25683329|62|(ABE;-;@13;NG;ATT:ATC;I:I;)	amino acid mutations; remove mode	TCATCAGGATTTTCAGGGTTCG			ENSECAT00000001051	I	62
ENSECAT00000001057|7|-|50618649|50618694|81|(ABE;+;@14;NG;ATA:ATG;I:M;)	amino acid mutations; remove mode	AAAGATGCTGGTGAACATCCAG			ENSECAT00000001057	M	81
ENSECAT00000001097|3|+|81994436|81994481|14|(Target-AID;+;@19;NG;ATC:ATT;I:I;)	amino acid mutations; remove mode	TTCGAAGCATTCAGCAAATTAG			ENSECAT00000001097	I	14
ENSECAT00000001097|3|+|81994436|81994481|14|(Target-AID;+;@19;NGG;ATC:ATT;I:I;)	amino acid mutations; remove mode	TTCGAAGCATTCAGCAAATTAGG			ENSECAT00000001097	I	14
ENSECAT00000001135|31|+|17101561|17101606|3|(ABE;+;@17;NG;AAG:AGG;K:R;)	amino acid mutations; remove mode	AGAGGAGTGAAAAGCCAGAGGG			ENSECAT00000001135	R	3
ENSECAT00000001245|24|-|41523127|41523172|4|(ABE;+;@17;NG;AAA:AAG;K:K;)	amino acid mutations; remove mode	GAAGAGTCGAGTGAAAACGCAG			ENSECAT00000001245	K	4
ENSECAT00000001295|11|-|47054111|47054156|81|(Target-AID;-;@18;NG;CTG:CTA;L:L;)	amino acid mutations; remove mode	AACAACTTGGGAATGGTCACAG			ENSECAT00000001295	L	81
ENSECAT00000001324|1|+|157443269|157443314|3|(ABE;-;@16;NG;TTG:CTG;L:L;)	amino acid mutations; remove mode	GTCAGCTTCATTTTACCTAGAG			ENSECAT00000001324	L	3
ENSECAT00000001324|1|+|157443269|157443314|3|(Target-AID;-;@18;NG;TTG:TTA;L:L;)	amino acid mutations; remove mode	GTCAGCTTCATTTTACCTAGAG			ENSECAT00000001324	L	3
ENSECAT00000001324|1|+|157443269|157443314|3|(ABE;-;@14;NG;TTG:CTG;L:L;)	amino acid mutations; remove mode	AAGTCAGCTTCATTTTACCTAG			ENSECAT00000001324	L	3
ENSECAT00000001370|5|-|77123064|77123109|12|(ABE;+;@15;NG;TTA:TTG;L:L;)	amino acid mutations; remove mode	AAGTTGCAGCTGCTGGCGGTGG			ENSECAT00000001370	L	12
ENSECAT00000001370|5|-|77123064|77123109|12|(ABE;+;@17;NG;TTA:TTG;L:L;)	amino acid mutations; remove mode	GTTGCAGCTGCTGGCGGTGGTG			ENSECAT00000001370	L	12
ENSECAT00000001370|5|-|77123064|77123109|12|(ABE;+;@17;NGG;TTA:TTG;L:L;)	amino acid mutations; remove mode	GTTGCAGCTGCTGGCGGTGGTGG			ENSECAT00000001370	L	12
ENSECAT00000001422|7|-|75889162|75889207|58|(ABE;-;@13;NG;CTC:CCC;L:P;)	amino acid mutations; remove mode	GTACATGGGCTTATGGAGGGAG			ENSECAT00000001422	P	58
ENSECAT00000001441|14|-|51931757|51931802|15|(Target-AID;+;@18;NG;CTA:TTA;L:L;)	amino acid mutations; remove mode	AGCTGCCGCGGGGTGACTTTTG			ENSECAT00000001441	L	15
ENSECAT00000001441|14|-|51931757|51931802|15|(Target-AID;-;@19;NG;TTG:TTA;L:L;)	amino acid mutations; remove mode	GCAGCTTCGCATACCGCGAGCG			ENSECAT00000001441	L	15
ENSECAT00000001441|14|-|51931757|51931802|15|(ABE;-;@15;NG;TTG:CTG;L:L;)	amino acid mutations; remove mode	CGGCAGCTTCGCATACCGCGAG			ENSECAT00000001441	L	15
ENSECAT00000001441|14|-|51931757|51931802|15|(Target-AID;-;@17;NG;TTG:TTA;L:L;)	amino acid mutations; remove mode	CGGCAGCTTCGCATACCGCGAG			ENSECAT00000001441	L	15
ENSECAT00000001441|14|-|51931757|51931802|15|(ABE;-;@13;NG;TTG:CTG;L:L;)	amino acid mutations; remove mode	CGCGGCAGCTTCGCATACCGCG			ENSECAT00000001441	L	15
ENSECAT00000001911|11|+|49137977|49138022|10|(ABE;-;@16;NG;CCT:CCC;P:P;)	amino acid mutations; remove mode	CCCAGGGTTTGCGCTGAAAGAG			ENSECAT00000001911	P	10
ENSECAT00000001911|11|+|49137977|49138022|10|(ABE;-;@14;NG;CCT:CCC;P:P;)	amino acid mutations; remove mode	GTCCCAGGGTTTGCGCTGAAAG			ENSECAT00000001911	P	10
ENSECAT00000001958|X|+|80254688|80254733|4|(Target-AID;+;@17;NG;CCC:CTC;P:L;)	amino acid mutations; remove mode	AACTCTGCAATGAAAATGAAGG			ENSECAT00000001958	L	4
ENSECAT00000002064|5|-|47416234|47416279|7|(Target-AID;+;@19;NG;CCT:TCT;P:S;)	amino acid mutations; remove mode	ATCTGCTCCTGCTCCCAAGAAG			ENSECAT00000002064	S	7
ENSECAT00000002064|5|-|47416234|47416279|7|(Target-AID;+;@19;NGG;CCT:TCT;P:S;)	amino acid mutations; remove mode	ATCTGCTCCTGCTCCCAAGAAGG			ENSECAT00000002064	S	7
ENSECAT00000002067|17|+|2088006|2088051|4|(Target-AID;+;@18;NG;CCT:TCT;P:S;)	amino acid mutations; remove mode	AGTCTTGTGAAGAAAATGAAGG			ENSECAT00000002067	S	4
ENSECAT00000002441|1|+|153278087|153278132|26|(Target-AID;-;@17;NGG;AGG:AAG;R:K;)	amino acid mutations; remove mode	TTCTTTTTCCCTTCAGCAGCGGG			ENSECAT00000002441	K	26
ENSECAT00000002441|1|+|153278087|153278132|26|(Target-AID;-;@18;NG;AGG:AAG;R:K;)	amino acid mutations; remove mode	TCTTTTTCCCTTCAGCAGCGGG			ENSECAT00000002441	K	26
ENSECAT00000002441|1|+|153278087|153278132|26|(Target-AID;-;@17;NG;AGG:AAG;R:K;)	amino acid mutations; remove mode	TTCTTTTTCCCTTCAGCAGCGG			ENSECAT00000002441	K	26
ENSECAT00000002532|X|+|81710491|81710536|4|(ABE;-;@14;NG;TCT:TCC;S:S;)	amino acid mutations; remove mode	TTGGCAGGATTTTTCCATGTCG			ENSECAT00000002532	S	4
ENSECAT00000002578|28|-|15585760|15585805|11|(ABE;-;@14;NGG;AGT:AGC;S:S;)	amino acid mutations; remove mode	CAGGCAGCTTTTGCCAGCCCAGG			ENSECAT00000002578	S	11
ENSECAT00000002578|28|-|15585760|15585805|11|(ABE;-;@15;NG;AGT:AGC;S:S;)	amino acid mutations; remove mode	AGGCAGCTTTTGCCAGCCCAGG			ENSECAT00000002578	S	11
ENSECAT00000002578|28|-|15585760|15585805|11|(ABE;-;@14;NG;AGT:AGC;S:S;)	amino acid mutations; remove mode	CAGGCAGCTTTTGCCAGCCCAG			ENSECAT00000002578	S	11
ENSECAT00000002593|20|-|25237169|25237214|7|(ABE;-;@15;NGG;TCT:TCC;S:S;)	amino acid mutations; remove mode	GGAGCGGATTTAGCTGGTTCCGG			ENSECAT00000002593	S	7
ENSECAT00000002593|20|-|25237169|25237214|7|(ABE;-;@16;NG;TCT:TCC;S:S;)	amino acid mutations; remove mode	GAGCGGATTTAGCTGGTTCCGG			ENSECAT00000002593	S	7
ENSECAT00000002593|20|-|25237169|25237214|7|(ABE;-;@15;NG;TCT:TCC;S:S;)	amino acid mutations; remove mode	GGAGCGGATTTAGCTGGTTCCG			ENSECAT00000002593	S	7
ENSECAT00000002627|12|-|31317159|31317204|20|(Target-AID;-;@17;NG;AGT:AAT;S:N;)	amino acid mutations; remove mode	GCATTTTTAGCAGCTTCCAAGG			ENSECAT00000002627	N	20
ENSECAT00000002762|17|+|7358165|7358210|8|(Target-AID;-;@18;NG;ACG:ACA;T:T;)	amino acid mutations; remove mode	GCTGTCTTCCTTTCGCCTTCAG			ENSECAT00000002762	T	8
ENSECAT00000002770|5|+|40053379|40053424|7|(Target-AID;+;@18;NG;ACC:ATC;T:I;)	amino acid mutations; remove mode	GATCCAGCACCCTCCACAGAAG			ENSECAT00000002770	I	7
ENSECAT00000002797|11|-|32087922|32087967|14|(ABE;+;@13;NG;GTA:GTG;V:V;)	amino acid mutations; remove mode	TGAAGGTGAATACCTTACAAGG			ENSECAT00000002797	V	14
ENSECAT00000002797|11|-|32087922|32087967|14|(ABE;+;@14;NG;GTA:GTG;V:V;)	amino acid mutations; remove mode	GAAGGTGAATACCTTACAAGGG			ENSECAT00000002797	V	14
ENSECAT00000002797|11|-|32087922|32087967|14|(ABE;+;@13;NGG;GTA:GTG;V:V;)	amino acid mutations; remove mode	TGAAGGTGAATACCTTACAAGGG			ENSECAT00000002797	V	14
ENSECAT00000002803|1|-|154780413|154780458|81|(Target-AID;-;@19;NG;GTG:ATG;V:M;)	amino acid mutations; remove mode	ATCTTGGGAGAAGTGACAGAAG			ENSECAT00000002803	M	81
ENSECAT00000002804|8|+|15528298|15528343|211|(ABE;+;@15;NG;GTA:GTG;V:V;)	amino acid mutations; remove mode	AAGGTGACCACTGAGCTCCTTG			ENSECAT00000002804	V	211
ENSECAT00000002806|7|-|31591544|31591589|79|(Target-AID;-;@19;NG;GTG:ATG;V:M;)	amino acid mutations; remove mode	ATCTTGGGAACAGTTGTTGAAG			ENSECAT00000002806	M	79
ENSECAT00000002829|15|+|11612854|11612899|23|(ABE;-;@16;NG;GTT:GCT;V:A;)	amino acid mutations; remove mode	GCCAGCCTTGATCACCCCTGAG			ENSECAT00000002829	A	23
ENSECAT00000002829|15|+|11612854|11612899|23|(ABE;-;@14;NG;GTT:GCT;V:A;)	amino acid mutations; remove mode	AAGCCAGCCTTGATCACCCCTG			ENSECAT00000002829	A	23
ENSECAT00000002840|24|-|10527521|10527566|4|(Target-AID;-;@18;NGG;GTT:ATT;V:I;)	amino acid mutations; remove mode	AATCTTCTCCATAGCAGGAGTGG			ENSECAT00000002840	I	4
ENSECAT00000002840|24|-|10527521|10527566|4|(Target-AID;-;@19;NG;GTT:ATT;V:I;)	amino acid mutations; remove mode	ATCTTCTCCATAGCAGGAGTGG			ENSECAT00000002840	I	4
ENSECAT00000002840|24|-|10527521|10527566|4|(Target-AID;-;@18;NG;GTT:ATT;V:I;)	amino acid mutations; remove mode	AATCTTCTCCATAGCAGGAGTG			ENSECAT00000002840	I	4
ENSECAT00000002853|7|-|31603808|31603853|79|(Target-AID;-;@19;NGG;GTG:ATG;V:M;)	amino acid mutations; remove mode	ATCTTGGGACAGGTTACAGATGG			ENSECAT00000002853	M	79
ENSECAT00000002853|7|-|31603808|31603853|79|(Target-AID;-;@19;NG;GTG:ATG;V:M;)	amino acid mutations; remove mode	ATCTTGGGACAGGTTACAGATG			ENSECAT00000002853	M	79
ENSECAT00000003152|16|+|43129818|43129863|22|(ABE;-;@13;NG;TAC:CAC;Y:H;)	amino acid mutations; remove mode	CTCACGTGCTTCCACAGGACCG			ENSECAT00000003152	H	22
ENSECAT00000003180|12|+|8365616|8365661|61|(ABE;-;@13;NGG;TAT:CAT;Y:H;)	amino acid mutations; remove mode	TGGGGATGCTTCAAGTTCATCGG			ENSECAT00000003180	H	61
ENSECAT00000003180|12|+|8365616|8365661|61|(ABE;-;@14;NG;TAT:CAT;Y:H;)	amino acid mutations; remove mode	GGGGATGCTTCAAGTTCATCGG			ENSECAT00000003180	H	61
ENSECAT00000003180|12|+|8365616|8365661|61|(ABE;-;@13;NG;TAT:CAT;Y:H;)	amino acid mutations; remove mode	TGGGGATGCTTCAAGTTCATCG			ENSECAT00000003180	H	61
ENSECAT00000003367|24|-|11711537|11711582|4|(ABE;-;@14;NGG;TAG:CAG;*:Q;)	amino acid mutations; remove mode	CGTACTGCTTCGCCATGGCTGGG			ENSECAT00000003367	Q	4
ENSECAT00000003367|24|-|11711537|11711582|4|(ABE;-;@13;NGG;TAG:CAG;*:Q;)	amino acid mutations; remove mode	TCGTACTGCTTCGCCATGGCTGG			ENSECAT00000003367	Q	4
ENSECAT00000003367|24|-|11711537|11711582|4|(ABE;-;@14;NG;TAG:CAG;*:Q;)	amino acid mutations; remove mode	CGTACTGCTTCGCCATGGCTGG			ENSECAT00000003367	Q	4
ENSECAT00000003367|24|-|11711537|11711582|4|(ABE;-;@13;NG;TAG:CAG;*:Q;)	amino acid mutations; remove mode	TCGTACTGCTTCGCCATGGCTG			ENSECAT00000003367	Q	4
17:5014688-5014688-|Target-AID|-|G:A|TGG:TAG|nucleotide|(Target-AID;-;@19;NGG;TGG:TAG;W:*;)	nucleotide mutations; create mode	CCATGTGTAGCTCCCCCTCTCGG	17:5014688-5014688-	T
17:5014688-5014688-|Target-AID|-|G:A|TGG:TAG|nucleotide|(Target-AID;-;@19;NG;TGG:TAG;W:*;)	nucleotide mutations; create mode	CCATGTGTAGCTCCCCCTCTCG	17:5014688-5014688-	T
6:756850-756850-|Target-AID|-|G:A|TGT:TAT|nucleotide|(Target-AID;-;@17;NG;TGT:TAT;C:Y;)	nucleotide mutations; create mode	AAACAGAGACATACCTTGCCTG	6:756850-756850-	T
5:514164-514164+|Target-AID|-|G:A|TGT:TAT|nucleotide|(Target-AID;-;@19;NGG;TGT:TAT;C:Y;)	nucleotide mutations; create mode	ACAGAAACATACTTTCAGAGTGG	5:514164-514164+	T
5:514164-514164+|Target-AID|-|G:A|TGT:TAT|nucleotide|(Target-AID;-;@19;NG;TGT:TAT;C:Y;)	nucleotide mutations; create mode	ACAGAAACATACTTTCAGAGTG	5:514164-514164+	T
15:7614241-7614241-|Target-AID|-|G:A|TGT:TAT|nucleotide|(Target-AID;-;@18;NG;TGT:TAT;C:Y;)	nucleotide mutations; create mode	TACAAACCCACTATAAACTCAG	15:7614241-7614241-	T
1:35395942-35395942+|Target-AID|-|G:A|GGA:GAA|nucleotide|(Target-AID;-;@17;NG;GGA:GAA;G:E;)	nucleotide mutations; create mode	CTTCCGGTCCGGCTCGGCTGCG	1:35395942-35395942+	T
X:39542971-39542971-|Target-AID|-|G:A|GGA:GAA|nucleotide|(Target-AID;-;@17;NG;GGA:GAA;G:E;)	nucleotide mutations; create mode	GGTCCCAAGTTCAGGACTGGAG	X:39542971-39542971-	T
7:5224062-5224062+|Target-AID|-|G:A|AGA:AAA|nucleotide|(Target-AID;-;@18;NG;AGA:AAA;R:K;)	nucleotide mutations; create mode	ATCTGCGCTGCGCCATCCCAAG	7:5224062-5224062+	T
4:1048204-1048204-|Target-AID|-|G:A|GGT:GAT|nucleotide|(Target-AID;-;@17;NG;GGT:GAT;G:D;)	nucleotide mutations; create mode	TGACCTTCAGTTAACAAACCAG	4:1048204-1048204-	T
15:15777348-15777348-|Target-AID|-|G:A|AGC:AAC|nucleotide|(Target-AID;-;@17;NG;AGC:AAC;S:N;)	nucleotide mutations; create mode	GGGCTTCCAGCTCCCCAAGGAG	15:15777348-15777348-	T
20:13196532-13196532+|Target-AID|-|G:A|TGC:TAC|nucleotide|(Target-AID;-;@18;NG;TGC:TAC;C:Y;)	nucleotide mutations; create mode	TGCAGGTGCGGGAGCCCCAGCG	20:13196532-13196532+	T
1:57243228-57243228+|Target-AID|-|G:A|TGC:TAC|nucleotide|(Target-AID;-;@18;NG;TGC:TAC;C:Y;)	nucleotide mutations; create mode	CGCAGAACGGTAACCAATGGAG	1:57243228-57243228+	T
24:20464412-20464412+|Target-AID|-|G:A|AGT:AAT|nucleotide|(Target-AID;-;@19;NGG;AGT:AAT;S:N;)	nucleotide mutations; create mode	ACTGTAGTTTGGAAGACGGCGGG	24:20464412-20464412+	T
24:20464412-20464412+|Target-AID|-|G:A|AGT:AAT|nucleotide|(Target-AID;-;@18;NGG;AGT:AAT;S:N;)	nucleotide mutations; create mode	AACTGTAGTTTGGAAGACGGCGG	24:20464412-20464412+	T
24:20464412-20464412+|Target-AID|-|G:A|AGT:AAT|nucleotide|(Target-AID;-;@19;NG;AGT:AAT;S:N;)	nucleotide mutations; create mode	ACTGTAGTTTGGAAGACGGCGG	24:20464412-20464412+	T
24:20464412-20464412+|Target-AID|-|G:A|AGT:AAT|nucleotide|(Target-AID;-;@18;NG;AGT:AAT;S:N;)	nucleotide mutations; create mode	AACTGTAGTTTGGAAGACGGCG	24:20464412-20464412+	T
17:24921384-24921384-|Target-AID|-|G:A|AGT:AAT|nucleotide|(Target-AID;-;@19;NG;AGT:AAT;S:N;)	nucleotide mutations; create mode	ACTGGTGGGGGAAGGCGAGAAG	17:24921384-24921384-	T
5:49872738-49872738+|Target-AID|-|G:A|AGC:AAC|nucleotide|(Target-AID;-;@18;NGG;AGC:AAC;S:N;)	nucleotide mutations; create mode	GGCTTCTAAAACTGGTCCAAAGG	5:49872738-49872738+	T
5:49872738-49872738+|Target-AID|-|G:A|AGC:AAC|nucleotide|(Target-AID;-;@19;NG;AGC:AAC;S:N;)	nucleotide mutations; create mode	GCTTCTAAAACTGGTCCAAAGG	5:49872738-49872738+	T
5:49872738-49872738+|Target-AID|-|G:A|AGC:AAC|nucleotide|(Target-AID;-;@18;NG;AGC:AAC;S:N;)	nucleotide mutations; create mode	GGCTTCTAAAACTGGTCCAAAG	5:49872738-49872738+	T
2:13580363-13580363+|Target-AID|-|G:A|AGT:AAT|nucleotide|(Target-AID;-;@18;NGG;AGT:AAT;S:N;)	nucleotide mutations; create mode	CACTGGGGCCGCTAAGGAGCGGG	2:13580363-13580363+	T
2:13580363-13580363+|Target-AID|-|G:A|AGT:AAT|nucleotide|(Target-AID;-;@19;NG;AGT:AAT;S:N;)	nucleotide mutations; create mode	ACTGGGGCCGCTAAGGAGCGGG	2:13580363-13580363+	T
2:13580363-13580363+|Target-AID|-|G:A|AGT:AAT|nucleotide|(Target-AID;-;@18;NG;AGT:AAT;S:N;)	nucleotide mutations; create mode	CACTGGGGCCGCTAAGGAGCGG	2:13580363-13580363+	T
18:52077613-52077613+|Target-AID|-|G:A|AGT:AAT|nucleotide|(Target-AID;-;@19;NG;AGT:AAT;S:N;)	nucleotide mutations; create mode	ACTTTAGAGAATGTGTAACAAG	18:52077613-52077613+	T
7:11941049-11941049+|Target-AID|-|G:A|TGC:TAC|nucleotide|(Target-AID;-;@18;NG;TGC:TAC;C:Y;)	nucleotide mutations; create mode	GGCAGCTGCGGCGGCGACCTTG	7:11941049-11941049+	T
X:121455287-121455287+|Target-AID|+|C:T|GCC:GTC|nucleotide|(Target-AID;+;@17;NG;GCC:GTC;A:V;)	nucleotide mutations; create mode	CTGCCTTCGTACTTGGCACCGG	X:121455287-121455287+	T
20:24876294-24876294-|Target-AID|+|C:T|TCA:TTA|nucleotide|(Target-AID;+;@18;NG;TCA:TTA;S:L;)	nucleotide mutations; create mode	CTCAGACTTCAGTGGGGACCAG	20:24876294-24876294-	T
25:36817396-36817396-|Target-AID|+|C:T|GCT:GTT|nucleotide|(Target-AID;+;@17;NG;GCT:GTT;A:V;)	nucleotide mutations; create mode	GTGCTGACCCCTTGCCTCTCAG	25:36817396-36817396-	T
1:148061565-148061565-|Target-AID|+|C:T|GCT:GTT|nucleotide|(Target-AID;+;@17;NG;GCT:GTT;A:V;)	nucleotide mutations; create mode	AGGCTGGGCCAAGCCTGAGGGG	1:148061565-148061565-	T
6:17421160-17421160-|Target-AID|+|C:T|TCC:TTC|nucleotide|(Target-AID;+;@17;NG;TCC:TTC;S:F;)	nucleotide mutations; create mode	TTTCCTCCAAAGACAACTCTTG	6:17421160-17421160-	T
20:31550771-31550771-|Target-AID|+|C:T|CCA:CTA|nucleotide|(Target-AID;+;@19;NG;CCA:CTA;P:L;)	nucleotide mutations; create mode	CCATCTCTTTGGGATTCTGATG	20:31550771-31550771-	T
20:31550771-31550771-|Target-AID|+|C:T|CCA:CTA|nucleotide|(Target-AID;+;@19;NGG;CCA:CTA;P:L;)	nucleotide mutations; create mode	CCATCTCTTTGGGATTCTGATGG	20:31550771-31550771-	T
5:43854383-43854383-|Target-AID|+|C:T|GCT:GTT|nucleotide|(Target-AID;+;@17;NG;GCT:GTT;A:V;)	nucleotide mutations; create mode	GAGCTCACAGGACTGGACCAAG	5:43854383-43854383-	T
6:71776262-71776262+|Target-AID|+|C:T|GCT:GTT|nucleotide|(Target-AID;+;@18;NG;GCT:GTT;A:V;)	nucleotide mutations; create mode	AGCTTTATAAATCCTAATATAG	6:71776262-71776262+	T
22:34828282-34828282+|Target-AID|+|C:T|GCT:GTT|nucleotide|(Target-AID;+;@18;NG;GCT:GTT;A:V;)	nucleotide mutations; create mode	AGCTCCATAACAGGCCACCCAG	22:34828282-34828282+	T
13:41891064-41891064-|Target-AID|+|C:T|ACG:ATG|nucleotide|(Target-AID;+;@17;NG;ACG:ATG;T:M;)	nucleotide mutations; create mode	GGACGCGTCCCCCTCTGCAGAG	13:41891064-41891064-	T
13:41891064-41891064-|Target-AID|+|C:T|ACG:ATG|nucleotide|(Target-AID;+;@18;NG;ACG:ATG;T:M;)	nucleotide mutations; create mode	GACGCGTCCCCCTCTGCAGAGG	13:41891064-41891064-	T
13:41891064-41891064-|Target-AID|+|C:T|ACG:ATG|nucleotide|(Target-AID;+;@17;NGG;ACG:ATG;T:M;)	nucleotide mutations; create mode	GGACGCGTCCCCCTCTGCAGAGG	13:41891064-41891064-	T
2:21023416-21023416+|Target-AID|+|C:T|CCG:CTG|nucleotide|(Target-AID;+;@19;NG;CCG:CTG;P:L;)	nucleotide mutations; create mode	CCGGATCCGCCTCATCACTGAG	2:21023416-21023416+	T
2:21023416-21023416+|Target-AID|+|C:T|CCG:CTG|nucleotide|(Target-AID;+;@19;NGG;CCG:CTG;P:L;)	nucleotide mutations; create mode	CCGGATCCGCCTCATCACTGAGG	2:21023416-21023416+	T
7:74041248-74041248+|Target-AID|+|C:T|ACA:ATA|nucleotide|(Target-AID;+;@18;NG;ACA:ATA;T:I;)	nucleotide mutations; create mode	CACAGCATGTGAATAGGTAGTG	7:74041248-74041248+	T
2:100915306-100915306-|Target-AID|+|C:T|GCG:GTG|nucleotide|(Target-AID;+;@17;NG;GCG:GTG;A:V;)	nucleotide mutations; create mode	AAGCGACCAGACTTCTTCTGTG	2:100915306-100915306-	T
10:25612448-25612448+|ABE|+|A:G|GAG:GGG|nucleotide|(ABE;+;@16;NG;GAG:GGG;E:G;)	nucleotide mutations; create mode	GAGGAGGTAAGAAAGCAAAGAG	10:25612448-25612448+	G
17:1037993-1037993-|ABE|+|A:G|GAG:GGG|nucleotide|(ABE;+;@14;NG;GAG:GGG;E:G;)	nucleotide mutations; create mode	TGAGCGAGCTGGAGTCGGAGGG	17:1037993-1037993-	G
17:1037993-1037993-|ABE|+|A:G|GAG:GGG|nucleotide|(ABE;+;@16;NG;GAG:GGG;E:G;)	nucleotide mutations; create mode	AGCGAGCTGGAGTCGGAGGGAG	17:1037993-1037993-	G
17:1037993-1037993-|ABE|+|A:G|GAG:GGG|nucleotide|(ABE;+;@17;NG;GAG:GGG;E:G;)	nucleotide mutations; create mode	GCGAGCTGGAGTCGGAGGGAGG	17:1037993-1037993-	G
17:1037993-1037993-|ABE|+|A:G|GAG:GGG|nucleotide|(ABE;+;@16;NGG;GAG:GGG;E:G;)	nucleotide mutations; create mode	AGCGAGCTGGAGTCGGAGGGAGG	17:1037993-1037993-	G
17:1037993-1037993-|ABE|+|A:G|GAG:GGG|nucleotide|(ABE;+;@17;NGG;GAG:GGG;E:G;)	nucleotide mutations; create mode	GCGAGCTGGAGTCGGAGGGAGGG	17:1037993-1037993-	G
7:74079550-74079550+|ABE|+|A:G|TAT:TGT|nucleotide|(ABE;+;@15;NG;TAT:TGT;Y:C;)	nucleotide mutations; create mode	CTGCTATGTGTCTTACTTCCTG	7:74079550-74079550+	G
7:74079550-74079550+|ABE|+|A:G|TAT:TGT|nucleotide|(ABE;+;@16;NG;TAT:TGT;Y:C;)	nucleotide mutations; create mode	TGCTATGTGTCTTACTTCCTGG	7:74079550-74079550+	G
7:74079550-74079550+|ABE|+|A:G|TAT:TGT|nucleotide|(ABE;+;@15;NGG;TAT:TGT;Y:C;)	nucleotide mutations; create mode	CTGCTATGTGTCTTACTTCCTGG	7:74079550-74079550+	G
22:6445847-6445847+|ABE|+|A:G|CAC:CGC|nucleotide|(ABE;+;@17;NG;CAC:CGC;H:R;)	nucleotide mutations; create mode	TACACTTCCCAGAATGCCACAG	22:6445847-6445847+	G
4:7821001-7821001+|ABE|+|A:G|CAC:CGC|nucleotide|(ABE;+;@14;NG;CAC:CGC;H:R;)	nucleotide mutations; create mode	GACGTCACTGCGCCCGTGCATG	4:7821001-7821001+	G
4:7821001-7821001+|ABE|+|A:G|CAC:CGC|nucleotide|(ABE;+;@16;NG;CAC:CGC;H:R;)	nucleotide mutations; create mode	CGTCACTGCGCCCGTGCATGCG	4:7821001-7821001+	G
28:15583978-15583978-|ABE|+|A:G|CAC:CGC|nucleotide|(ABE;+;@16;NG;CAC:CGC;H:R;)	nucleotide mutations; create mode	AATCACCCAAAGGTCATCTGCG	28:15583978-15583978-	G
4:77127162-77127162-|ABE|+|A:G|CAT:CGT|nucleotide|(ABE;+;@14;NG;CAT:CGT;H:R;)	nucleotide mutations; create mode	GCATCCATGAAAACACGCCATG	4:77127162-77127162-	G
28:38130798-38130798+|ABE|+|A:G|CAG:CGG|nucleotide|(ABE;+;@16;NG;CAG:CGG;Q:R;)	nucleotide mutations; create mode	GCGCAGGCGCATTACCCTCCCG	28:38130798-38130798+	G
10:11118908-11118908-|ABE|+|A:G|GAG:GGG|nucleotide|(ABE;+;@14;NG;GAG:GGG;E:G;)	nucleotide mutations; create mode	TCACCGAGAGTGGGAGTGGGAG	10:11118908-11118908-	G
10:11118908-11118908-|ABE|+|A:G|GAG:GGG|nucleotide|(ABE;+;@14;NGG;GAG:GGG;E:G;)	nucleotide mutations; create mode	TCACCGAGAGTGGGAGTGGGAGG	10:11118908-11118908-	G
X:53095181-53095181+|ABE|+|A:G|GAA:GGA|nucleotide|(ABE;+;@13;NG;GAA:GGA;E:G;)	nucleotide mutations; create mode	CTCTTGGAAGGGGTGGGGGAGG	X:53095181-53095181+	G
X:53095181-53095181+|ABE|+|A:G|GAA:GGA|nucleotide|(ABE;+;@13;NGG;GAA:GGA;E:G;)	nucleotide mutations; create mode	CTCTTGGAAGGGGTGGGGGAGGG	X:53095181-53095181+	G
1:10146316-10146316+|ABE|+|A:G|GAT:GGT|nucleotide|(ABE;+;@16;NG;GAT:GGT;D:G;)	nucleotide mutations; create mode	TATGATGCAAGAAATGTCTGTG	1:10146316-10146316+	G
21:3781458-3781458+|ABE|+|A:G|GAT:GGT|nucleotide|(ABE;+;@14;NG;GAT:GGT;D:G;)	nucleotide mutations; create mode	TCCGGGATGCTCTGCGCGGCAG	21:3781458-3781458+	G
6:67074676-67074676-|ABE|+|A:G|AAT:AGT|nucleotide|(ABE;+;@17;NG;AAT:AGT;N:S;)	nucleotide mutations; create mode	CCAATCCTCCCACTCCCGGAAG	6:67074676-67074676-	G
30:12589-12589+|ABE|-|T:C|GTT:GCT|nucleotide|(ABE;-;@17;NGG;GTT:GCT;V:A;)	nucleotide mutations; create mode	TCAACCCCTTATCTGATATATGG	30:12589-12589+	G
30:12589-12589+|ABE|-|T:C|GTT:GCT|nucleotide|(ABE;-;@17;NG;GTT:GCT;V:A;)	nucleotide mutations; create mode	TCAACCCCTTATCTGATATATG	30:12589-12589+	G
4:96907943-96907943+|ABE|-|T:C|ATA:ACA|nucleotide|(ABE;-;@16;NG;ATA:ACA;I:T;)	nucleotide mutations; create mode	GCATATTGCATATGACCTGCAG	4:96907943-96907943+	G
6:32541088-32541088+|ABE|-|T:C|GTA:GCA|nucleotide|(ABE;-;@17;NGG;GTA:GCA;V:A;)	nucleotide mutations; create mode	GGTACCTGCAACTCTAGGTCTGG	6:32541088-32541088+	G
6:32541088-32541088+|ABE|-|T:C|GTA:GCA|nucleotide|(ABE;-;@17;NG;GTA:GCA;V:A;)	nucleotide mutations; create mode	GGTACCTGCAACTCTAGGTCTG	6:32541088-32541088+	G
6:32541088-32541088+|ABE|-|T:C|GTA:GCA|nucleotide|(ABE;-;@13;NG;GTA:GCA;V:A;)	nucleotide mutations; create mode	CCCTGGTACCTGCAACTCTAGG	6:32541088-32541088+	G
1:75751217-75751217+|ABE|-|T:C|CTC:CCC|nucleotide|(ABE;-;@13;NGG;CTC:CCC;L:P;)	nucleotide mutations; create mode	TAGTCGGAGGCTGGAAGAAGGGG	1:75751217-75751217+	G
1:75751217-75751217+|ABE|-|T:C|CTC:CCC|nucleotide|(ABE;-;@16;NG;CTC:CCC;L:P;)	nucleotide mutations; create mode	TCGGAGGCTGGAAGAAGGGGAG	1:75751217-75751217+	G
1:75751217-75751217+|ABE|-|T:C|CTC:CCC|nucleotide|(ABE;-;@14;NG;CTC:CCC;L:P;)	nucleotide mutations; create mode	AGTCGGAGGCTGGAAGAAGGGG	1:75751217-75751217+	G
1:75751217-75751217+|ABE|-|T:C|CTC:CCC|nucleotide|(ABE;-;@13;NG;CTC:CCC;L:P;)	nucleotide mutations; create mode	TAGTCGGAGGCTGGAAGAAGGG	1:75751217-75751217+	G
26:27913160-27913160-|ABE|-|T:C|TTG:TCG|nucleotide|(ABE;-;@13;NG;TTG:TCG;L:S;)	nucleotide mutations; create mode	ATCTCCCAAGCACATCTGAAGG	26:27913160-27913160-	G
X:31058783-31058783-|ABE|-|T:C|CTA:CCA|nucleotide|(ABE;-;@14;NGG;CTA:CCA;L:P;)	nucleotide mutations; create mode	GTGGTTAGAAAGTTGCCTCCTGG	X:31058783-31058783-	G
X:31058783-31058783-|ABE|-|T:C|CTA:CCA|nucleotide|(ABE;-;@14;NG;CTA:CCA;L:P;)	nucleotide mutations; create mode	GTGGTTAGAAAGTTGCCTCCTG	X:31058783-31058783-	G
8:84877088-84877088+|ABE|-|T:C|GTC:GCC|nucleotide|(ABE;-;@16;NG;GTC:GCC;V:A;)	nucleotide mutations; create mode	CTCGACTGCTCGGCGTGGGACG	8:84877088-84877088+	G
8:84877088-84877088+|ABE|-|T:C|GTC:GCC|nucleotide|(ABE;-;@13;NG;GTC:GCC;V:A;)	nucleotide mutations; create mode	GTACTCGACTGCTCGGCGTGGG	8:84877088-84877088+	G
11:53275646-53275646-|ABE|-|T:C|ATG:ACG|nucleotide|(ABE;-;@16;NGG;ATG:ACG;M:T;)	nucleotide mutations; create mode	TTTCATGGCAAATCCCACCAAGG	11:53275646-53275646-	G
11:53275646-53275646-|ABE|-|T:C|ATG:ACG|nucleotide|(ABE;-;@17;NG;ATG:ACG;M:T;)	nucleotide mutations; create mode	TTCATGGCAAATCCCACCAAGG	11:53275646-53275646-	G
11:53275646-53275646-|ABE|-|T:C|ATG:ACG|nucleotide|(ABE;-;@16;NG;ATG:ACG;M:T;)	nucleotide mutations; create mode	TTTCATGGCAAATCCCACCAAG	11:53275646-53275646-	G
1:118834631-118834631+|ABE|-|T:C|CTC:CCC|nucleotide|(ABE;-;@16;NGG;CTC:CCC;L:P;)	nucleotide mutations; create mode	CCTGAGCTCCGCACCTTCAGCGG	1:118834631-118834631+	G
1:118834631-118834631+|ABE|-|T:C|CTC:CCC|nucleotide|(ABE;-;@17;NG;CTC:CCC;L:P;)	nucleotide mutations; create mode	CTGAGCTCCGCACCTTCAGCGG	1:118834631-118834631+	G
1:118834631-118834631+|ABE|-|T:C|CTC:CCC|nucleotide|(ABE;-;@16;NG;CTC:CCC;L:P;)	nucleotide mutations; create mode	CCTGAGCTCCGCACCTTCAGCG	1:118834631-118834631+	G
1:118834631-118834631+|ABE|-|T:C|CTC:CCC|nucleotide|(ABE;-;@14;NG;CTC:CCC;L:P;)	nucleotide mutations; create mode	ACCCTGAGCTCCGCACCTTCAG	1:118834631-118834631+	G
X:89005032-89005032+|ABE|-|T:C|GTG:GCG|nucleotide|(ABE;-;@16;NG;GTG:GCG;V:A;)	nucleotide mutations; create mode	AGACACTGTTATGAGCAAATAG	X:89005032-89005032+	G
13:19372863-19372863-|ABE|-|T:C|CTG:CCG|nucleotide|(ABE;-;@17;NGG;CTG:CCG;L:P;)	nucleotide mutations; create mode	ACCAGCTCGGGTTCCCAGGCTGG	13:19372863-19372863-	G
13:19372863-19372863-|ABE|-|T:C|CTG:CCG|nucleotide|(ABE;-;@17;NG;CTG:CCG;L:P;)	nucleotide mutations; create mode	ACCAGCTCGGGTTCCCAGGCTG	13:19372863-19372863-	G
9:81755022-81755022+|ABE|-|T:C|CTG:CCG|nucleotide|(ABE;-;@16;NG;CTG:CCG;L:P;)	nucleotide mutations; create mode	GTCCAGGCCAGGCACCTAAGCG	9:81755022-81755022+	G
9:81755022-81755022+|ABE|-|T:C|CTG:CCG|nucleotide|(ABE;-;@14;NG;CTG:CCG;L:P;)	nucleotide mutations; create mode	GCGTCCAGGCCAGGCACCTAAG	9:81755022-81755022+	G
X:942527-942527-|ABE|+|A:G|GAG:GGG|nucleotide|(ABE;+;@15;NG;GAG:GGG;E:G;)	nucleotide mutations; remove mode	CGTTGGGACACAAGCGATGGAG	X:942527-942527-	G
3:9650482-9650482+|ABE|+|A:G|GAG:GGG|nucleotide|(ABE;+;@14;NG;GAG:GGG;E:G;)	nucleotide mutations; remove mode	ATGGAGGGGGAGGTGACAGGAG	3:9650482-9650482+	G
3:9650482-9650482+|ABE|+|A:G|GAG:GGG|nucleotide|(ABE;+;@15;NG;GAG:GGG;E:G;)	nucleotide mutations; remove mode	TGGAGGGGGAGGTGACAGGAGG	3:9650482-9650482+	G
3:9650482-9650482+|ABE|+|A:G|GAG:GGG|nucleotide|(ABE;+;@17;NG;GAG:GGG;E:G;)	nucleotide mutations; remove mode	GAGGGGGAGGTGACAGGAGGCG	3:9650482-9650482+	G
3:9650482-9650482+|ABE|+|A:G|GAG:GGG|nucleotide|(ABE;+;@14;NGG;GAG:GGG;E:G;)	nucleotide mutations; remove mode	ATGGAGGGGGAGGTGACAGGAGG	3:9650482-9650482+	G
3:9650482-9650482+|ABE|+|A:G|GAG:GGG|nucleotide|(ABE;+;@17;NGG;GAG:GGG;E:G;)	nucleotide mutations; remove mode	GAGGGGGAGGTGACAGGAGGCGG	3:9650482-9650482+	G
3:2577834-2577834-|ABE|+|A:G|GAG:GGG|nucleotide|(ABE;+;@16;NG;GAG:GGG;E:G;)	nucleotide mutations; remove mode	TGTGGGGAACTGAACATAAGAG	3:2577834-2577834-	G
1:148439909-148439909+|ABE|+|A:G|GAG:GGG|nucleotide|(ABE;+;@17;NG;GAG:GGG;E:G;)	nucleotide mutations; remove mode	GCGGGGAGGGGAGAGGGCAGAG	1:148439909-148439909+	G
17:5014688-5014688-|ABE|+|A:G|TAG:TGG|nucleotide|(ABE;+;@15;NG;TAG:TGG;*:W;)	nucleotide mutations; remove mode	CACATGGGATTCTCCTCTCAAG	17:5014688-5014688-	G
18:71601463-71601463-|ABE|+|A:G|TAG:TGG|nucleotide|(ABE;+;@14;NG;TAG:TGG;*:W;)	nucleotide mutations; remove mode	AAAAGTGGTTTGAATTGTATTG	18:71601463-71601463-	G
20:36596154-36596154+|ABE|+|A:G|TAG:TGG|nucleotide|(ABE;+;@15;NG;TAG:TGG;*:W;)	nucleotide mutations; remove mode	CGGGTGGAGGCAAAGTGTGGGG	20:36596154-36596154+	G
20:36596154-36596154+|ABE|+|A:G|TAG:TGG|nucleotide|(ABE;+;@17;NG;TAG:TGG;*:W;)	nucleotide mutations; remove mode	GGTGGAGGCAAAGTGTGGGGAG	20:36596154-36596154+	G
20:36596154-36596154+|ABE|+|A:G|TAG:TGG|nucleotide|(ABE;+;@17;NGG;TAG:TGG;*:W;)	nucleotide mutations; remove mode	GGTGGAGGCAAAGTGTGGGGAGG	20:36596154-36596154+	G
15:7614241-7614241-|ABE|+|A:G|TAT:TGT|nucleotide|(ABE;+;@15;NG;TAT:TGT;Y:C;)	nucleotide mutations; remove mode	GGTTTGTAGTAAAGCGCTGAAG	15:7614241-7614241-	G
9:12590581-12590581+|ABE|+|A:G|GAA:GGA|nucleotide|(ABE;+;@16;NG;GAA:GGA;E:G;)	nucleotide mutations; remove mode	CCGGGAGTCCCCGCCTCATCAG	9:12590581-12590581+	G
9:12590581-12590581+|ABE|+|A:G|GAA:GGA|nucleotide|(ABE;+;@17;NG;GAA:GGA;E:G;)	nucleotide mutations; remove mode	CGGGAGTCCCCGCCTCATCAGG	9:12590581-12590581+	G
9:12590581-12590581+|ABE|+|A:G|GAA:GGA|nucleotide|(ABE;+;@16;NGG;GAA:GGA;E:G;)	nucleotide mutations; remove mode	CCGGGAGTCCCCGCCTCATCAGG	9:12590581-12590581+	G
1:36544400-36544400+|ABE|+|A:G|GAA:GGA|nucleotide|(ABE;+;@15;NG;GAA:GGA;E:G;)	nucleotide mutations; remove mode	CGGCGGAGGAGCTACCTCTGTG	1:36544400-36544400+	G
3:9034295-9034295+|ABE|+|A:G|GAA:GGA|nucleotide|(ABE;+;@16;NG;GAA:GGA;E:G;)	nucleotide mutations; remove mode	CAAGGACGGGGCGGGGCCTTTG	3:9034295-9034295+	G
3:29001180-29001180+|ABE|+|A:G|GAA:GGA|nucleotide|(ABE;+;@15;NG;GAA:GGA;E:G;)	nucleotide mutations; remove mode	GGAGGGAGAACAGGAAGGGAAG	3:29001180-29001180+	G
7:5224062-5224062+|ABE|+|A:G|AAA:AGA|nucleotide|(ABE;+;@13;NG;AAA:AGA;K:R;)	nucleotide mutations; remove mode	CAGCGCAGATTCGGAGCAGAGG	7:5224062-5224062+	G
7:5224062-5224062+|ABE|+|A:G|AAA:AGA|nucleotide|(ABE;+;@17;NG;AAA:AGA;K:R;)	nucleotide mutations; remove mode	GCAGATTCGGAGCAGAGGTGTG	7:5224062-5224062+	G
3:9661425-9661425-|ABE|+|A:G|GAT:GGT|nucleotide|(ABE;+;@14;NG;GAT:GGT;D:G;)	nucleotide mutations; remove mode	CAGAGGGTGCTTACAGACAGAG	3:9661425-9661425-	G
15:15777348-15777348-|ABE|+|A:G|AAC:AGC|nucleotide|(ABE;+;@16;NG;AAC:AGC;N:S;)	nucleotide mutations; remove mode	GGAAGCCCACTCCTCATGACTG	15:15777348-15777348-	G
1:30198027-30198027+|ABE|+|A:G|TAC:TGC|nucleotide|(ABE;+;@14;NG;TAC:TGC;Y:C;)	nucleotide mutations; remove mode	TGAACTGCGTTGCCAAGTTCCG	1:30198027-30198027+	G
1:30198027-30198027+|ABE|+|A:G|TAC:TGC|nucleotide|(ABE;+;@14;NGG;TAC:TGC;Y:C;)	nucleotide mutations; remove mode	TGAACTGCGTTGCCAAGTTCCGG	1:30198027-30198027+	G
24:35969594-35969594-|ABE|+|A:G|TAC:TGC|nucleotide|(ABE;+;@14;NG;TAC:TGC;Y:C;)	nucleotide mutations; remove mode	CCCAGTGCTGTTGCTGTGTTTG	24:35969594-35969594-	G
24:35969594-35969594-|ABE|+|A:G|TAC:TGC|nucleotide|(ABE;+;@14;NGG;TAC:TGC;Y:C;)	nucleotide mutations; remove mode	CCCAGTGCTGTTGCTGTGTTTGG	24:35969594-35969594-	G
27:23843610-23843610+|ABE|+|A:G|GAC:GGC|nucleotide|(ABE;+;@13;NG;GAC:GGC;D:G;)	nucleotide mutations; remove mode	GGGGCAGGCGCGCGGAGAGCGG	27:23843610-23843610+	G
27:23843610-23843610+|ABE|+|A:G|GAC:GGC|nucleotide|(ABE;+;@14;NG;GAC:GGC;D:G;)	nucleotide mutations; remove mode	GGGCAGGCGCGCGGAGAGCGGG	27:23843610-23843610+	G
27:23843610-23843610+|ABE|+|A:G|GAC:GGC|nucleotide|(ABE;+;@15;NG;GAC:GGC;D:G;)	nucleotide mutations; remove mode	GGCAGGCGCGCGGAGAGCGGGG	27:23843610-23843610+	G
27:23843610-23843610+|ABE|+|A:G|GAC:GGC|nucleotide|(ABE;+;@13;NGG;GAC:GGC;D:G;)	nucleotide mutations; remove mode	GGGGCAGGCGCGCGGAGAGCGGG	27:23843610-23843610+	G
27:23843610-23843610+|ABE|+|A:G|GAC:GGC|nucleotide|(ABE;+;@14;NGG;GAC:GGC;D:G;)	nucleotide mutations; remove mode	GGGCAGGCGCGCGGAGAGCGGGG	27:23843610-23843610+	G
21:3942721-3942721+|ABE|+|A:G|CAG:CGG|nucleotide|(ABE;+;@17;NG;CAG:CGG;Q:R;)	nucleotide mutations; remove mode	CCCGGCGACGGGGGAAAGCAGG	21:3942721-3942721+	G
21:3942721-3942721+|ABE|+|A:G|CAG:CGG|nucleotide|(ABE;+;@17;NGG;CAG:CGG;Q:R;)	nucleotide mutations; remove mode	CCCGGCGACGGGGGAAAGCAGGG	21:3942721-3942721+	G
24:20464412-20464412+|ABE|+|A:G|AAT:AGT|nucleotide|(ABE;+;@15;NG;AAT:AGT;N:S;)	nucleotide mutations; remove mode	CTACAGTTTCTCTCGCAGAGCG	24:20464412-20464412+	G
24:20464412-20464412+|ABE|+|A:G|AAT:AGT|nucleotide|(ABE;+;@16;NG;AAT:AGT;N:S;)	nucleotide mutations; remove mode	TACAGTTTCTCTCGCAGAGCGG	24:20464412-20464412+	G
24:20464412-20464412+|ABE|+|A:G|AAT:AGT|nucleotide|(ABE;+;@15;NGG;AAT:AGT;N:S;)	nucleotide mutations; remove mode	CTACAGTTTCTCTCGCAGAGCGG	24:20464412-20464412+	G
17:24921384-24921384-|ABE|+|A:G|AAT:AGT|nucleotide|(ABE;+;@15;NG;AAT:AGT;N:S;)	nucleotide mutations; remove mode	CACCAGTTCGTGCCTGTTGAAG	17:24921384-24921384-	G
29:9863031-9863031-|ABE|+|A:G|TAA:TGA|nucleotide|(ABE;+;@13;NG;TAA:TGA;*:*;)	nucleotide mutations; remove mode	TTGACTTGACGTCACTCAAGGG	29:9863031-9863031-	G
29:9863031-9863031-|ABE|+|A:G|TAA:TGA|nucleotide|(ABE;+;@15;NG;TAA:TGA;*:*;)	nucleotide mutations; remove mode	GACTTGACGTCACTCAAGGGTG	29:9863031-9863031-	G
29:9863031-9863031-|ABE|+|A:G|TAA:TGA|nucleotide|(ABE;+;@17;NG;TAA:TGA;*:*;)	nucleotide mutations; remove mode	CTTGACGTCACTCAAGGGTGTG	29:9863031-9863031-	G
5:43924832-43924832+|ABE|+|A:G|GAC:GGC|nucleotide|(ABE;+;@14;NG;GAC:GGC;D:G;)	nucleotide mutations; remove mode	CCAACGGCGCAGGGGGAGGAGG	5:43924832-43924832+	G
15:27539503-27539503+|ABE|+|A:G|CAG:CGG|nucleotide|(ABE;+;@16;NG;CAG:CGG;Q:R;)	nucleotide mutations; remove mode	CGGCGGCAAGGCAAGAGGCGGG	15:27539503-27539503+	G
14:8462764-8462764-|ABE|+|A:G|GAG:GGG|nucleotide|(ABE;+;@17;NG;GAG:GGG;E:G;)	nucleotide mutations; remove mode	ACGGGTTAGATGTATAAACCTG	14:8462764-8462764-	G
14:8462764-8462764-|ABE|+|A:G|GAG:GGG|nucleotide|(ABE;+;@17;NGG;GAG:GGG;E:G;)	nucleotide mutations; remove mode	ACGGGTTAGATGTATAAACCTGG	14:8462764-8462764-	G
15:55984463-55984463+|ABE|+|A:G|GAG:GGG|nucleotide|(ABE;+;@17;NG;GAG:GGG;E:G;)	nucleotide mutations; remove mode	CGGGGCAGCCCGTCTGCTGGCG	15:55984463-55984463+	G
15:28589941-28589941-|ABE|+|A:G|GAG:GGG|nucleotide|(ABE;+;@15;NG;GAG:GGG;E:G;)	nucleotide mutations; remove mode	CTGAGGGGCGATACTGGAGCTG	15:28589941-28589941-	G
31:21988201-21988201+|ABE|+|A:G|TAT:TGT|nucleotide|(ABE;+;@14;NG;TAT:TGT;Y:C;)	nucleotide mutations; remove mode	TGGGATGTGGGAAAGCAGGAAG	31:21988201-21988201+	G
2:13580363-13580363+|ABE|+|A:G|AAT:AGT|nucleotide|(ABE;+;@13;NG;AAT:AGT;N:S;)	nucleotide mutations; remove mode	GGCCCCAGTGAATCCAACGCGG	2:13580363-13580363+	G
2:13580363-13580363+|ABE|+|A:G|AAT:AGT|nucleotide|(ABE;+;@14;NG;AAT:AGT;N:S;)	nucleotide mutations; remove mode	GCCCCAGTGAATCCAACGCGGG	2:13580363-13580363+	G
2:13580363-13580363+|ABE|+|A:G|AAT:AGT|nucleotide|(ABE;+;@15;NG;AAT:AGT;N:S;)	nucleotide mutations; remove mode	CCCCAGTGAATCCAACGCGGGG	2:13580363-13580363+	G
2:13580363-13580363+|ABE|+|A:G|AAT:AGT|nucleotide|(ABE;+;@13;NGG;AAT:AGT;N:S;)	nucleotide mutations; remove mode	GGCCCCAGTGAATCCAACGCGGG	2:13580363-13580363+	G
2:13580363-13580363+|ABE|+|A:G|AAT:AGT|nucleotide|(ABE;+;@14;NGG;AAT:AGT;N:S;)	nucleotide mutations; remove mode	GCCCCAGTGAATCCAACGCGGGG	2:13580363-13580363+	G
4:18135436-18135436+|ABE|+|A:G|GAA:GGA|nucleotide|(ABE;+;@14;NG;GAA:GGA;E:G;)	nucleotide mutations; remove mode	GAGGTGGACAGACGAAACAGGG	4:18135436-18135436+	G
4:18135436-18135436+|ABE|+|A:G|GAA:GGA|nucleotide|(ABE;+;@15;NG;GAA:GGA;E:G;)	nucleotide mutations; remove mode	AGGTGGACAGACGAAACAGGGG	4:18135436-18135436+	G
4:18135436-18135436+|ABE|+|A:G|GAA:GGA|nucleotide|(ABE;+;@14;NGG;GAA:GGA;E:G;)	nucleotide mutations; remove mode	GAGGTGGACAGACGAAACAGGGG	4:18135436-18135436+	G
21:2286040-2286040+|ABE|-|T:C|GTC:GCC|nucleotide|(ABE;-;@15;NGG;GTC:GCC;V:A;)	nucleotide mutations; remove mode	CTGGGGCAATGACCTTGCCCAGG	21:2286040-2286040+	G
21:2286040-2286040+|ABE|-|T:C|GTC:GCC|nucleotide|(ABE;-;@15;NG;GTC:GCC;V:A;)	nucleotide mutations; remove mode	CTGGGGCAATGACCTTGCCCAG	21:2286040-2286040+	G
22:22852017-22852017-|ABE|-|T:C|GTC:GCC|nucleotide|(ABE;-;@14;NG;GTC:GCC;V:A;)	nucleotide mutations; remove mode	TTGCAGGCCTGGGTCCTTTGAG	22:22852017-22852017-	G
11:18574413-18574413-|ABE|-|T:C|ATA:ACA|nucleotide|(ABE;-;@17;NG;ATA:ACA;I:T;)	nucleotide mutations; remove mode	TGTGTCATAAAAAGGTCCATTG	11:18574413-18574413-	G
7:72460867-72460867+|ABE|-|T:C|TTA:TCA|nucleotide|(ABE;-;@14;NG;TTA:TCA;L:S;)	nucleotide mutations; remove mode	CCTGGTGATATTCTTAGCTCAG	7:72460867-72460867+	G
25:36817396-36817396-|ABE|-|T:C|GTT:GCT|nucleotide|(ABE;-;@13;NG;GTT:GCT;V:A;)	nucleotide mutations; remove mode	GGGGTCAGCACGGGACCGTGGG	25:36817396-36817396-	G
1:148061565-148061565-|ABE|-|T:C|GTT:GCT|nucleotide|(ABE;-;@14;NG;GTT:GCT;V:A;)	nucleotide mutations; remove mode	GGCCCAGCCTCAGGGAAGACTG	1:148061565-148061565-	G
6:17421160-17421160-|ABE|-|T:C|TTC:TCC|nucleotide|(ABE;-;@13;NG;TTC:TCC;F:S;)	nucleotide mutations; remove mode	TTTGGAGGAAACAAAACTGCAG	6:17421160-17421160-	G
12:32956729-32956729+|ABE|-|T:C|CTC:CCC|nucleotide|(ABE;-;@15;NGG;CTC:CCC;L:P;)	nucleotide mutations; remove mode	CTCAGGGTGCCCTCCCTCTCTGG	12:32956729-32956729+	G
12:32956729-32956729+|ABE|-|T:C|CTC:CCC|nucleotide|(ABE;-;@15;NG;CTC:CCC;L:P;)	nucleotide mutations; remove mode	CTCAGGGTGCCCTCCCTCTCTG	12:32956729-32956729+	G
X:20017204-20017204+|ABE|-|T:C|TTT:TCT|nucleotide|(ABE;-;@13;NG;TTT:TCT;F:S;)	nucleotide mutations; remove mode	AGCCTCAGAAGGGAGCTTCTAG	X:20017204-20017204+	G
16:732864-732864-|ABE|-|T:C|CTA:CCA|nucleotide|(ABE;-;@15;NG;CTA:CCA;L:P;)	nucleotide mutations; remove mode	TGAATGGGGACAGAACCTGGAG	16:732864-732864-	G
28:45996662-45996662+|ABE|-|T:C|GTT:GCT|nucleotide|(ABE;-;@16;NG;GTT:GCT;V:A;)	nucleotide mutations; remove mode	CGGAGCTTCTCTGCTGTGGCTG	28:45996662-45996662+	G
28:45996662-45996662+|ABE|-|T:C|GTT:GCT|nucleotide|(ABE;-;@13;NG;GTT:GCT;V:A;)	nucleotide mutations; remove mode	TCTCGGAGCTTCTCTGCTGTGG	28:45996662-45996662+	G
22:34828282-34828282+|ABE|-|T:C|GTT:GCT|nucleotide|(ABE;-;@16;NGG;GTT:GCT;V:A;)	nucleotide mutations; remove mode	TGGAGCTCAGGAGGGGCCCTAGG	22:34828282-34828282+	G
22:34828282-34828282+|ABE|-|T:C|GTT:GCT|nucleotide|(ABE;-;@17;NG;GTT:GCT;V:A;)	nucleotide mutations; remove mode	GGAGCTCAGGAGGGGCCCTAGG	22:34828282-34828282+	G
22:34828282-34828282+|ABE|-|T:C|GTT:GCT|nucleotide|(ABE;-;@16;NG;GTT:GCT;V:A;)	nucleotide mutations; remove mode	TGGAGCTCAGGAGGGGCCCTAG	22:34828282-34828282+	G
X:79947340-79947340+|ABE|-|T:C|ATC:ACC|nucleotide|(ABE;-;@15;NG;ATC:ACC;I:T;)	nucleotide mutations; remove mode	AAGTGGTAGGAAACGTAGATTG	X:79947340-79947340+	G
4:36749061-36749061-|ABE|-|T:C|CTC:CCC|nucleotide|(ABE;-;@17;NG;CTC:CCC;L:P;)	nucleotide mutations; remove mode	AGGGGCTATATCTATAAATTTG	4:36749061-36749061-	G
13:41891064-41891064-|ABE|-|T:C|ATG:ACG|nucleotide|(ABE;-;@13;NGG;ATG:ACG;M:T;)	nucleotide mutations; remove mode	GGGACGCGTCCTCTTTTATTGGG	13:41891064-41891064-	G
13:41891064-41891064-|ABE|-|T:C|ATG:ACG|nucleotide|(ABE;-;@13;NG;ATG:ACG;M:T;)	nucleotide mutations; remove mode	GGGACGCGTCCTCTTTTATTGG	13:41891064-41891064-	G
7:33196710-33196710+|ABE|-|T:C|ATG:ACG|nucleotide|(ABE;-;@15;NGG;ATG:ACG;M:T;)	nucleotide mutations; remove mode	ACCTCGTAGATGTCTGTGCTTGG	7:33196710-33196710+	G
7:33196710-33196710+|ABE|-|T:C|ATG:ACG|nucleotide|(ABE;-;@16;NG;ATG:ACG;M:T;)	nucleotide mutations; remove mode	CCTCGTAGATGTCTGTGCTTGG	7:33196710-33196710+	G
7:33196710-33196710+|ABE|-|T:C|ATG:ACG|nucleotide|(ABE;-;@15;NG;ATG:ACG;M:T;)	nucleotide mutations; remove mode	ACCTCGTAGATGTCTGTGCTTG	7:33196710-33196710+	G
2:21023416-21023416+|ABE|-|T:C|CTG:CCG|nucleotide|(ABE;-;@13;NGG;CTG:CCG;L:P;)	nucleotide mutations; remove mode	CGGATCCGGGTCTATTGGCGGGG	2:21023416-21023416+	G
2:21023416-21023416+|ABE|-|T:C|CTG:CCG|nucleotide|(ABE;-;@13;NG;CTG:CCG;L:P;)	nucleotide mutations; remove mode	CGGATCCGGGTCTATTGGCGGG	2:21023416-21023416+	G
25:31565420-31565420-|ABE|-|T:C|CTG:CCG|nucleotide|(ABE;-;@15;NGG;CTG:CCG;L:P;)	nucleotide mutations; remove mode	GGGACGGGGTGGCAGGGAGGGGG	25:31565420-31565420-	G
25:31565420-31565420-|ABE|-|T:C|CTG:CCG|nucleotide|(ABE;-;@14;NGG;CTG:CCG;L:P;)	nucleotide mutations; remove mode	AGGGACGGGGTGGCAGGGAGGGG	25:31565420-31565420-	G
25:31565420-31565420-|ABE|-|T:C|CTG:CCG|nucleotide|(ABE;-;@13;NGG;CTG:CCG;L:P;)	nucleotide mutations; remove mode	CAGGGACGGGGTGGCAGGGAGGG	25:31565420-31565420-	G
25:31565420-31565420-|ABE|-|T:C|CTG:CCG|nucleotide|(ABE;-;@15;NG;CTG:CCG;L:P;)	nucleotide mutations; remove mode	GGGACGGGGTGGCAGGGAGGGG	25:31565420-31565420-	G
25:31565420-31565420-|ABE|-|T:C|CTG:CCG|nucleotide|(ABE;-;@14;NG;CTG:CCG;L:P;)	nucleotide mutations; remove mode	AGGGACGGGGTGGCAGGGAGGG	25:31565420-31565420-	G
25:31565420-31565420-|ABE|-|T:C|CTG:CCG|nucleotide|(ABE;-;@13;NG;CTG:CCG;L:P;)	nucleotide mutations; remove mode	CAGGGACGGGGTGGCAGGGAGG	25:31565420-31565420-	G
28:45341690-45341690+|ABE|-|T:C|TTC:TCC|nucleotide|(ABE;-;@15;NG;TTC:TCC;F:S;)	nucleotide mutations; remove mode	TCTTGGACCAGCTTCCCTGGAG	28:45341690-45341690+	G
19:49431625-49431625-|ABE|-|T:C|TTA:TCA|nucleotide|(ABE;-;@13;NGG;TTA:TCA;L:S;)	nucleotide mutations; remove mode	GCCCAGTGAGCAAACGACCAAGG	19:49431625-49431625-	G
19:49431625-49431625-|ABE|-|T:C|TTA:TCA|nucleotide|(ABE;-;@16;NG;TTA:TCA;L:S;)	nucleotide mutations; remove mode	CAGTGAGCAAACGACCAAGGAG	19:49431625-49431625-	G
19:49431625-49431625-|ABE|-|T:C|TTA:TCA|nucleotide|(ABE;-;@13;NG;TTA:TCA;L:S;)	nucleotide mutations; remove mode	GCCCAGTGAGCAAACGACCAAG	19:49431625-49431625-	G
13:15630322-15630322+|ABE|-|T:C|TTA:TCA|nucleotide|(ABE;-;@16;NGG;TTA:TCA;L:S;)	nucleotide mutations; remove mode	CATTGATGCTCCCTGTTGTCAGG	13:15630322-15630322+	G
13:15630322-15630322+|ABE|-|T:C|TTA:TCA|nucleotide|(ABE;-;@17;NG;TTA:TCA;L:S;)	nucleotide mutations; remove mode	ATTGATGCTCCCTGTTGTCAGG	13:15630322-15630322+	G
13:15630322-15630322+|ABE|-|T:C|TTA:TCA|nucleotide|(ABE;-;@16;NG;TTA:TCA;L:S;)	nucleotide mutations; remove mode	CATTGATGCTCCCTGTTGTCAG	13:15630322-15630322+	G
7:85671640-85671640-|ABE|-|T:C|CTT:CCT|nucleotide|(ABE;-;@16;NGG;CTT:CCT;L:P;)	nucleotide mutations; remove mode	ACCAGGTCCTGGCCTCGCCGAGG	7:85671640-85671640-	G
7:85671640-85671640-|ABE|-|T:C|CTT:CCT|nucleotide|(ABE;-;@16;NG;CTT:CCT;L:P;)	nucleotide mutations; remove mode	ACCAGGTCCTGGCCTCGCCGAG	7:85671640-85671640-	G
7:85671640-85671640-|ABE|-|T:C|CTT:CCT|nucleotide|(ABE;-;@14;NG;CTT:CCT;L:P;)	nucleotide mutations; remove mode	ACACCAGGTCCTGGCCTCGCCG	7:85671640-85671640-	G
6:67708923-67708923+|ABE|-|T:C|CTT:CCT|nucleotide|(ABE;-;@15;NGG;CTT:CCT;L:P;)	nucleotide mutations; remove mode	ACCCAGGGAGACAGAGTGCCTGG	6:67708923-67708923+	G
6:67708923-67708923+|ABE|-|T:C|CTT:CCT|nucleotide|(ABE;-;@15;NG;CTT:CCT;L:P;)	nucleotide mutations; remove mode	ACCCAGGGAGACAGAGTGCCTG	6:67708923-67708923+	G
7:74079550-74079550+|Target-AID|-|G:A|TGT:TAT|nucleotide|(Target-AID;-;@17;NG;TGT:TAT;C:Y;)	nucleotide mutations; remove mode	ACATAGCAGATGTGTCTCACAG	7:74079550-74079550+	T
5:47415796-47415796-|Target-AID|-|G:A|AGA:AAA|nucleotide|(Target-AID;-;@17;NG;AGA:AAA;R:K;)	nucleotide mutations; remove mode	GCTTTCCAACAAGTGTTTACAG	5:47415796-47415796-	T
28:38130798-38130798+|Target-AID|-|G:A|CGG:CAG|nucleotide|(Target-AID;-;@18;NG;CGG:CAG;R:Q;)	nucleotide mutations; remove mode	CCTGCGCAAACGGAGGGCAACG	28:38130798-38130798+	T
1:144481271-144481271-|Target-AID|-|G:A|CGG:CAG|nucleotide|(Target-AID;-;@18;NG;CGG:CAG;R:Q;)	nucleotide mutations; remove mode	TCTGAGCTCAGCGCATTGGATG	1:144481271-144481271-	T
1:158396693-158396693-|Target-AID|-|G:A|CGG:CAG|nucleotide|(Target-AID;-;@18;NG;CGG:CAG;R:Q;)	nucleotide mutations; remove mode	ACTGAGTGTTAATCATTAACAG	1:158396693-158396693-	T
11:49137872-49137872+|Target-AID|-|G:A|GGA:GAA|nucleotide|(Target-AID;-;@18;NG;GGA:GAA;G:E;)	nucleotide mutations; remove mode	TTTCTACCACCCGGGAGGGGGG	11:49137872-49137872+	T
X:53095181-53095181+|Target-AID|-|G:A|GGA:GAA|nucleotide|(Target-AID;-;@17;NG;GGA:GAA;G:E;)	nucleotide mutations; remove mode	CCTTCCAAGAGCCAGTGACAGG	X:53095181-53095181+	T
5:19521300-19521300-|Target-AID|-|G:A|TGA:TAA|nucleotide|(Target-AID;-;@19;NG;TGA:TAA;*:*;)	nucleotide mutations; remove mode	TTACCTTCCGTGGGGACCAGAG	5:19521300-19521300-	T
11:46716980-46716980-|Target-AID|-|G:A|TGA:TAA|nucleotide|(Target-AID;-;@17;NG;TGA:TAA;*:*;)	nucleotide mutations; remove mode	TCTTACCCTGTGAGATCAAAGG	11:46716980-46716980-	T
1:10146316-10146316+|Target-AID|-|G:A|GGT:GAT|nucleotide|(Target-AID;-;@17;NGG;GGT:GAT;G:D;)	nucleotide mutations; remove mode	GCATCATAACTGGCCTACTTGGG	1:10146316-10146316+	T
1:10146316-10146316+|Target-AID|-|G:A|GGT:GAT|nucleotide|(Target-AID;-;@18;NG;GGT:GAT;G:D;)	nucleotide mutations; remove mode	CATCATAACTGGCCTACTTGGG	1:10146316-10146316+	T
1:10146316-10146316+|Target-AID|-|G:A|GGT:GAT|nucleotide|(Target-AID;-;@17;NG;GGT:GAT;G:D;)	nucleotide mutations; remove mode	GCATCATAACTGGCCTACTTGG	1:10146316-10146316+	T
21:3781458-3781458+|Target-AID|-|G:A|GGT:GAT|nucleotide|(Target-AID;-;@17;NG;GGT:GAT;G:D;)	nucleotide mutations; remove mode	GCATCCCGGAACATGTAGTTTG	21:3781458-3781458+	T
20:20744500-20744500+|Target-AID|-|G:A|TGT:TAT|nucleotide|(Target-AID;-;@17;NGG;TGT:TAT;C:Y;)	nucleotide mutations; remove mode	GCATAAACGCGCACTGTTGGGGG	20:20744500-20744500+	T
20:20744500-20744500+|Target-AID|-|G:A|TGT:TAT|nucleotide|(Target-AID;-;@17;NG;TGT:TAT;C:Y;)	nucleotide mutations; remove mode	GCATAAACGCGCACTGTTGGGG	20:20744500-20744500+	T
20:17145508-17145508+|Target-AID|+|C:T|CCT:CTT|nucleotide|(Target-AID;+;@18;NG;CCT:CTT;P:L;)	nucleotide mutations; remove mode	GCTTCCTGTATAAATAAACGCG	20:17145508-17145508+	T
26:27896736-27896736-|Target-AID|+|C:T|CCC:CTC|nucleotide|(Target-AID;+;@19;NG;CCC:CTC;P:L;)	nucleotide mutations; remove mode	CTCATCAACCTCCCAGTCGCTG	26:27896736-27896736-	T
6:38498062-38498062-|Target-AID|+|C:T|TCA:TTA|nucleotide|(Target-AID;+;@17;NG;TCA:TTA;S:L;)	nucleotide mutations; remove mode	ACTTATTCCATTGTGGAAACAG	6:38498062-38498062-	T
1:154871168-154871168-|Target-AID|+|C:T|TCA:TTA|nucleotide|(Target-AID;+;@19;NG;TCA:TTA;S:L;)	nucleotide mutations; remove mode	TTACATTTAGGCATTTACCCTG	1:154871168-154871168-	T
4:82576028-82576028-|Target-AID|+|C:T|CCG:CTG|nucleotide|(Target-AID;+;@18;NG;CCG:CTG;P:L;)	nucleotide mutations; remove mode	TCTGTGTCCAGGTTTCTATATG	4:82576028-82576028-	T
3:58569705-58569705+|Target-AID|+|C:T|CCG:CTG|nucleotide|(Target-AID;+;@18;NG;CCG:CTG;P:L;)	nucleotide mutations; remove mode	CCTGGTAAGGGGAGAGGAAAAG	3:58569705-58569705+	T
X:31058783-31058783-|Target-AID|+|C:T|CCA:CTA|nucleotide|(Target-AID;+;@18;NG;CCA:CTA;P:L;)	nucleotide mutations; remove mode	TCTAACCACCTTGAAACCCTCG	X:31058783-31058783-	T
8:84877088-84877088+|Target-AID|+|C:T|GCC:GTC|nucleotide|(Target-AID;+;@18;NG;GCC:GTC;A:V;)	nucleotide mutations; remove mode	AGTCGAGTACCGGATCGCGGAG	8:84877088-84877088+	T
8:84877088-84877088+|Target-AID|+|C:T|GCC:GTC|nucleotide|(Target-AID;+;@19;NG;GCC:GTC;A:V;)	nucleotide mutations; remove mode	GTCGAGTACCGGATCGCGGAGG	8:84877088-84877088+	T
8:84877088-84877088+|Target-AID|+|C:T|GCC:GTC|nucleotide|(Target-AID;+;@18;NGG;GCC:GTC;A:V;)	nucleotide mutations; remove mode	AGTCGAGTACCGGATCGCGGAGG	8:84877088-84877088+	T
8:84877088-84877088+|Target-AID|+|C:T|GCC:GTC|nucleotide|(Target-AID;+;@19;NGG;GCC:GTC;A:V;)	nucleotide mutations; remove mode	GTCGAGTACCGGATCGCGGAGGG	8:84877088-84877088+	T
1:126342619-126342619+|Target-AID|+|C:T|TCC:TTC|nucleotide|(Target-AID;+;@19;NG;TCC:TTC;S:F;)	nucleotide mutations; remove mode	TTCTGCCGCTTCCTGGGAGATG	1:126342619-126342619+	T
1:118834631-118834631+|Target-AID|+|C:T|CCC:CTC|nucleotide|(Target-AID;+;@17;NG;CCC:CTC;P:L;)	nucleotide mutations; remove mode	AGCTCAGGGTGCCGAGAGCGCG	1:118834631-118834631+	T
1:118834631-118834631+|Target-AID|+|C:T|CCC:CTC|nucleotide|(Target-AID;+;@17;NGG;CCC:CTC;P:L;)	nucleotide mutations; remove mode	AGCTCAGGGTGCCGAGAGCGCGG	1:118834631-118834631+	T
13:19372863-19372863-|Target-AID|+|C:T|CCG:CTG|nucleotide|(Target-AID;+;@17;NG;CCG:CTG;P:L;)	nucleotide mutations; remove mode	AGCTGGTACTGAAGCCCCCCAG	13:19372863-19372863-	T
X:34719444-34719444-|Target-AID|+|C:T|CCT:CTT|nucleotide|(Target-AID;+;@17;NG;CCT:CTT;P:L;)	nucleotide mutations; remove mode	TACTTACAGTTGAATTGTACAG	X:34719444-34719444-	T
16:43284877-43284877+|Target-AID|+|C:T|TCA:TTA|nucleotide|(Target-AID;+;@19;NG;TCA:TTA;S:L;)	nucleotide mutations; remove mode	TTACTATAACTTGCAGGCCAGG	16:43284877-43284877+	T
16:43284877-43284877+|Target-AID|+|C:T|TCA:TTA|nucleotide|(Target-AID;+;@19;NGG;TCA:TTA;S:L;)	nucleotide mutations; remove mode	TTACTATAACTTGCAGGCCAGGG	16:43284877-43284877+	T
7:32659432-32659432-|Target-AID|+|C:T|TCA:TTA|nucleotide|(Target-AID;+;@19;NG;TCA:TTA;S:L;)	nucleotide mutations; remove mode	TTACTATGGCAAACAAAATTTG	7:32659432-32659432-	T
13:39827011-39827011-|Target-AID|+|C:T|TCC:TTC|nucleotide|(Target-AID;+;@18;NG;TCC:TTC;S:F;)	nucleotide mutations; remove mode	TTTCAGGAGTGGTTGGGCTGAG	13:39827011-39827011-	T

## Sheet: Felis catus
guide: id	mutation format; mode of mutagenesis	guide+PAM sequence	genome coordinate	nucleotide mutation	transcript: id	amino acid mutation	aminoacid: position
ENSFCAT00000000029|X|-|20282769|20282814|4|(ABE;-;@17;NG;GTA:GCA;V:A;)	amino acid mutations; create mode	ATTACCTGAAACACAGAAGCAG			ENSFCAT00000000029	A	4
ENSFCAT00000000035|A3|+|121867704|121867749|9|(ABE;+;@16;NG;ACG:GCG;T:A;)	amino acid mutations; create mode	CAAGACGGTTTCGGAGCTTCGG			ENSFCAT00000000035	A	9
ENSFCAT00000000035|A3|+|121867704|121867749|9|(ABE;+;@17;NG;ACG:GCG;T:A;)	amino acid mutations; create mode	AAGACGGTTTCGGAGCTTCGGG			ENSFCAT00000000035	A	9
ENSFCAT00000000035|A3|+|121867704|121867749|9|(ABE;+;@16;NGG;ACG:GCG;T:A;)	amino acid mutations; create mode	CAAGACGGTTTCGGAGCTTCGGG			ENSFCAT00000000035	A	9
ENSFCAT00000000035|A3|+|121867704|121867749|9|(ABE;+;@17;NGG;ACG:GCG;T:A;)	amino acid mutations; create mode	AAGACGGTTTCGGAGCTTCGGGG			ENSFCAT00000000035	A	9
ENSFCAT00000000079|B4|-|77819287|77819332|12|(ABE;-;@15;NGG;GTG:GCG;V:A;)	amino acid mutations; create mode	CATCCACCTTGGGGACCAGGAGG			ENSFCAT00000000079	A	12
ENSFCAT00000000079|B4|-|77819287|77819332|12|(ABE;-;@16;NG;GTG:GCG;V:A;)	amino acid mutations; create mode	ATCCACCTTGGGGACCAGGAGG			ENSFCAT00000000079	A	12
ENSFCAT00000000079|B4|-|77819287|77819332|12|(ABE;-;@15;NG;GTG:GCG;V:A;)	amino acid mutations; create mode	CATCCACCTTGGGGACCAGGAG			ENSFCAT00000000079	A	12
ENSFCAT00000000090|A2|+|53875070|53875115|11|(Target-AID;+;@19;NG;GCC:GCT;A:A;)	amino acid mutations; create mode	CCGAGCATTGGTGAGGAGCGGG			ENSFCAT00000000090	A	11
ENSFCAT00000000090|A2|+|53875070|53875115|11|(Target-AID;+;@19;NGG;GCC:GCT;A:A;)	amino acid mutations; create mode	CCGAGCATTGGTGAGGAGCGGGG			ENSFCAT00000000090	A	11
ENSFCAT00000000091|B4|-|78001539|78001584|6|(ABE;-;@16;NG;GTG:GCG;V:A;)	amino acid mutations; create mode	CTTCACCTGTAGTCAAAAAGAG			ENSFCAT00000000091	A	6
ENSFCAT00000000091|B4|-|78001539|78001584|6|(ABE;-;@14;NG;GTG:GCG;V:A;)	amino acid mutations; create mode	TTCTTCACCTGTAGTCAAAAAG			ENSFCAT00000000091	A	6
ENSFCAT00000000169|B1|+|207249662|207249707|33|(Target-AID;+;@18;NG;CGC:TGC;R:C;)	amino acid mutations; create mode	AGCGCAGAGCCGACGGGAGGCG			ENSFCAT00000000169	C	33
ENSFCAT00000000299|B4|+|81398581|81398626|61|(Target-AID;-;@17;NG;GAG:GAA;E:E;)	amino acid mutations; create mode	GGTCTCCTTCTCGCCCTGGATG			ENSFCAT00000000299	E	61
ENSFCAT00000000306|B4|+|81524104|81524149|57|(ABE;+;@17;NG;GAA:GAG;E:E;)	amino acid mutations; create mode	GGAAGCTGGGGGCTGTCTCAGG			ENSFCAT00000000306	E	57
ENSFCAT00000000395|D4|-|95590800|95590845|7|(Target-AID;+;@17;NG;CTC:TTC;L:F;)	amino acid mutations; create mode	AAGCTCCAGCTGTTTGTTAAGG			ENSFCAT00000000395	F	7
ENSFCAT00000000455|B1|+|140260137|140260182|77|(ABE;+;@17;NG;GGA:GGG;G:G;)	amino acid mutations; create mode	GGGAGGGCGCAGGCGGCGCCCG			ENSFCAT00000000455	G	77
ENSFCAT00000000455|B1|+|140260137|140260182|77|(ABE;+;@17;NGG;GGA:GGG;G:G;)	amino acid mutations; create mode	GGGAGGGCGCAGGCGGCGCCCGG			ENSFCAT00000000455	G	77
ENSFCAT00000000474|A2|+|9116039|9116084|27|(ABE;+;@16;NG;GAG:GGG;E:G;)	amino acid mutations; create mode	AAGGAGCCCTGCATCCTGGGTG			ENSFCAT00000000474	G	27
ENSFCAT00000000475|A2|+|9138161|9138206|15|(ABE;+;@15;NG;GAT:GGT;D:G;)	amino acid mutations; create mode	GAAGGATTTGCCTCTGCCCCGG			ENSFCAT00000000475	G	15
ENSFCAT00000000477|A2|+|9173318|9173363|33|(Target-AID;+;@18;NG;GGC:GGT;G:G;)	amino acid mutations; create mode	GGCGGGAAGACACAGAACCGAG			ENSFCAT00000000477	G	33
ENSFCAT00000000485|A2|+|9392625|9392670|6|(ABE;+;@15;NG;GAG:GGG;E:G;)	amino acid mutations; create mode	GAAGGAGGCTCAACGCATCATG			ENSFCAT00000000485	G	6
ENSFCAT00000000511|D1|+|109644318|109644363|6|(Target-AID;-;@17;NG;GGG:GGA;G:G;)	amino acid mutations; create mode	GGGCCCCTTGCCCCCATCCATG			ENSFCAT00000000511	G	6
ENSFCAT00000000541|C2|+|150687326|150687371|39|(ABE;+;@16;NG;GAT:GGT;D:G;)	amino acid mutations; create mode	AAAGATGCCACCACGCCTGCAG			ENSFCAT00000000541	G	39
ENSFCAT00000000652|B3|+|35768300|35768345|5|(Target-AID;+;@19;NG;ACA:ATA;T:I;)	amino acid mutations; create mode	ACAGCTTCTCTGAAGAGCCCTG			ENSFCAT00000000652	I	5
ENSFCAT00000000790|C2|-|80476429|80476474|33|(Target-AID;-;@19;NGG;GAA:AAA;E:K;)	amino acid mutations; create mode	TCTTTCCAAGAGAAATGAGCTGG			ENSFCAT00000000790	K	33
ENSFCAT00000000790|C2|-|80476429|80476474|33|(Target-AID;-;@19;NG;GAA:AAA;E:K;)	amino acid mutations; create mode	TCTTTCCAAGAGAAATGAGCTG			ENSFCAT00000000790	K	33
ENSFCAT00000000802|C1|-|15417253|15417298|137|(Target-AID;-;@18;NG;AGA:AAA;R:K;)	amino acid mutations; create mode	CTCTCTTGGCTGGAGGGGGCTG			ENSFCAT00000000802	K	137
ENSFCAT00000000814|B3|-|146480635|146480680|42|(Target-AID;-;@18;NG;GAG:AAG;E:K;)	amino acid mutations; create mode	CTCTTTATTCGAGTAGAAAGTG			ENSFCAT00000000814	K	42
ENSFCAT00000000928|C2|+|68329945|68329990|26|(Target-AID;-;@19;NGG;CTG:CTA;L:L;)	amino acid mutations; create mode	CCAGCTTCAAGCGTGTTCGGGGG			ENSFCAT00000000928	L	26
ENSFCAT00000000928|C2|+|68329945|68329990|26|(Target-AID;-;@19;NG;CTG:CTA;L:L;)	amino acid mutations; create mode	CCAGCTTCAAGCGTGTTCGGGG			ENSFCAT00000000928	L	26
ENSFCAT00000000928|C2|+|68329945|68329990|26|(Target-AID;+;@18;NG;CTG:TTG;L:L;)	amino acid mutations; create mode	AGCTGGGAATCTACTTCCAGAG			ENSFCAT00000000928	L	26
ENSFCAT00000000959|C1|-|222193097|222193142|38|(Target-AID;+;@17;NG;CTG:TTG;L:L;)	amino acid mutations; create mode	AAGCTGTGCCAGAGCAGGATGG			ENSFCAT00000000959	L	38
ENSFCAT00000001164|D1|+|16557646|16557691|97|(ABE;-;@16;NG;TCT:CCT;S:P;)	amino acid mutations; create mode	AAAGACTTGAAGGCGAAGAGCG			ENSFCAT00000001164	P	97
ENSFCAT00000001182|A3|+|587893|587938|100|(ABE;-;@17;NG;CTG:CCG;L:P;)	amino acid mutations; create mode	CTCAGCTTGGTCCTTAGCTCCG			ENSFCAT00000001182	P	100
ENSFCAT00000001193|C1|-|92748365|92748410|31|(ABE;-;@14;NG;CTG:CCG;L:P;)	amino acid mutations; create mode	CGATCCAGCTTCTGGAAGAGGG			ENSFCAT00000001193	P	31
ENSFCAT00000001202|A1|-|92924842|92924887|46|(Target-AID;-;@19;NG;CCG:CCA;P:P;)	amino acid mutations; create mode	GCGGCTTGGCCGCGCTCCGCAG			ENSFCAT00000001202	P	46
ENSFCAT00000001209|A3|+|84608054|84608099|14|(ABE;-;@16;NG;CTA:CCA;L:P;)	amino acid mutations; create mode	ATCTAGTTTCTAAAAATAGAAG			ENSFCAT00000001209	P	14
ENSFCAT00000001220|A2|+|367368|367413|48|(ABE;+;@15;NG;CCA:CCG;P:P;)	amino acid mutations; create mode	AAGCCACGGGCCCTGCCTGCTG			ENSFCAT00000001220	P	48
ENSFCAT00000001221|X|-|45562131|45562176|184|(ABE;-;@17;NGG;TCC:CCC;S:P;)	amino acid mutations; create mode	TGGACTTTGCTGGAGCCCCTGGG			ENSFCAT00000001221	P	184
ENSFCAT00000001221|X|-|45562131|45562176|184|(ABE;-;@16;NGG;TCC:CCC;S:P;)	amino acid mutations; create mode	GTGGACTTTGCTGGAGCCCCTGG			ENSFCAT00000001221	P	184
ENSFCAT00000001221|X|-|45562131|45562176|184|(ABE;-;@17;NG;TCC:CCC;S:P;)	amino acid mutations; create mode	TGGACTTTGCTGGAGCCCCTGG			ENSFCAT00000001221	P	184
ENSFCAT00000001221|X|-|45562131|45562176|184|(ABE;-;@16;NG;TCC:CCC;S:P;)	amino acid mutations; create mode	GTGGACTTTGCTGGAGCCCCTG			ENSFCAT00000001221	P	184
ENSFCAT00000001232|D2|+|33541736|33541781|35|(ABE;-;@15;NG;CTC:CCC;L:P;)	amino acid mutations; create mode	CACTGAGCTTTCCGGAGAGGCG			ENSFCAT00000001232	P	35
ENSFCAT00000001286|A1|-|118943550|118943595|23|(Target-AID;-;@19;NG;CAG:CAA;Q:Q;)	amino acid mutations; create mode	GCTGCTTGAGGCCCCGCACGCG			ENSFCAT00000001286	Q	23
ENSFCAT00000001286|A1|-|118943550|118943595|23|(Target-AID;-;@17;NG;CAG:CAA;Q:Q;)	amino acid mutations; create mode	CTGCTGCTTGAGGCCCCGCACG			ENSFCAT00000001286	Q	23
ENSFCAT00000001371|B3|-|38573362|38573407|27|(ABE;-;@15;NGG;TGG:CGG;W:R;)	amino acid mutations; create mode	AAGCCACTTGGCGTCTTCCTCGG			ENSFCAT00000001371	R	27
ENSFCAT00000001371|B3|-|38573362|38573407|27|(ABE;-;@16;NG;TGG:CGG;W:R;)	amino acid mutations; create mode	AGCCACTTGGCGTCTTCCTCGG			ENSFCAT00000001371	R	27
ENSFCAT00000001371|B3|-|38573362|38573407|27|(ABE;-;@15;NG;TGG:CGG;W:R;)	amino acid mutations; create mode	AAGCCACTTGGCGTCTTCCTCG			ENSFCAT00000001371	R	27
ENSFCAT00000001380|E3|-|20034238|20034283|132|(Target-AID;+;@19;NG;CGC:CGT;R:R;)	amino acid mutations; create mode	GCTTCGGAGGCCATCGTATTCG			ENSFCAT00000001380	R	132
ENSFCAT00000001408|E1|-|29374271|29374316|41|(Target-AID;-;@19;NG;GGA:AGA;G:R;)	amino acid mutations; create mode	CCTTTCTCTTCTGTAATAACAG			ENSFCAT00000001408	R	41
ENSFCAT00000001434|E3|-|37426045|37426090|14|(ABE;-;@17;NG;AGT:AGC;S:S;)	amino acid mutations; create mode	GTCACTTTTGAAGGTGACCTCG			ENSFCAT00000001434	S	14
ENSFCAT00000001523|E2|+|8581640|8581685|68|(ABE;-;@17;NGG;ATC:ACC;I:T;)	amino acid mutations; create mode	ATGATTTTCCGCCGGCCACATGG			ENSFCAT00000001523	T	68
ENSFCAT00000001523|E2|+|8581640|8581685|68|(ABE;-;@17;NG;ATC:ACC;I:T;)	amino acid mutations; create mode	ATGATTTTCCGCCGGCCACATG			ENSFCAT00000001523	T	68
ENSFCAT00000001567|E2|-|4219674|4219719|52|(ABE;-;@13;NGG;ATG:ACG;M:T;)	amino acid mutations; create mode	CAGGGCCATCTTGACCTCCGTGG			ENSFCAT00000001567	T	52
ENSFCAT00000001567|E2|-|4219674|4219719|52|(ABE;-;@14;NG;ATG:ACG;M:T;)	amino acid mutations; create mode	AGGGCCATCTTGACCTCCGTGG			ENSFCAT00000001567	T	52
ENSFCAT00000001567|E2|-|4219674|4219719|52|(ABE;-;@13;NG;ATG:ACG;M:T;)	amino acid mutations; create mode	CAGGGCCATCTTGACCTCCGTG			ENSFCAT00000001567	T	52
ENSFCAT00000001596|A2|-|6169462|6169507|8|(Target-AID;+;@18;NG;GCG:GTG;A:V;)	amino acid mutations; create mode	GGCGGTGGTGGGGGAAAGTGAG			ENSFCAT00000001596	V	8
ENSFCAT00000001610|B4|+|96548294|96548339|14|(Target-AID;+;@17;NG;GCT:GTT;A:V;)	amino acid mutations; create mode	AGGCTGGAGCTGATGAAGAGAG			ENSFCAT00000001610	V	14
ENSFCAT00000001610|B4|+|96548294|96548339|14|(Target-AID;+;@18;NG;GCT:GTT;A:V;)	amino acid mutations; create mode	GGCTGGAGCTGATGAAGAGAGG			ENSFCAT00000001610	V	14
ENSFCAT00000001610|B4|+|96548294|96548339|14|(Target-AID;+;@19;NG;GCT:GTT;A:V;)	amino acid mutations; create mode	GCTGGAGCTGATGAAGAGAGGG			ENSFCAT00000001610	V	14
ENSFCAT00000001610|B4|+|96548294|96548339|14|(Target-AID;+;@17;NGG;GCT:GTT;A:V;)	amino acid mutations; create mode	AGGCTGGAGCTGATGAAGAGAGG			ENSFCAT00000001610	V	14
ENSFCAT00000001610|B4|+|96548294|96548339|14|(Target-AID;+;@18;NGG;GCT:GTT;A:V;)	amino acid mutations; create mode	GGCTGGAGCTGATGAAGAGAGGG			ENSFCAT00000001610	V	14
ENSFCAT00000001611|B4|-|96572539|96572584|33|(ABE;+;@16;NG;ATG:GTG;M:V;)	amino acid mutations; create mode	CAAGATGGTAGATCTGAGTGGG			ENSFCAT00000001611	V	33
ENSFCAT00000001622|B4|-|42998995|42999040|76|(Target-AID;-;@17;NGG;GTG:GTA;V:V;)	amino acid mutations; create mode	CAGCACTTTTACTCTGGGGCTGG			ENSFCAT00000001622	V	76
ENSFCAT00000001622|B4|-|42998995|42999040|76|(Target-AID;-;@18;NG;GTG:GTA;V:V;)	amino acid mutations; create mode	AGCACTTTTACTCTGGGGCTGG			ENSFCAT00000001622	V	76
ENSFCAT00000001622|B4|-|42998995|42999040|76|(Target-AID;-;@17;NG;GTG:GTA;V:V;)	amino acid mutations; create mode	CAGCACTTTTACTCTGGGGCTG			ENSFCAT00000001622	V	76
ENSFCAT00000001637|B3|-|124759590|124759635|24|(Target-AID;+;@17;NG;GCA:GTA;A:V;)	amino acid mutations; create mode	AGGCAAGATCTCAGAGATCACG			ENSFCAT00000001637	V	24
ENSFCAT00000001639|B3|+|124809404|124809449|5|(Target-AID;+;@17;NG;GCT:GTT;A:V;)	amino acid mutations; create mode	AGGCTCTCAAGCTTGCTTCGTG			ENSFCAT00000001639	V	5
ENSFCAT00000001639|B3|+|124809404|124809449|5|(Target-AID;+;@18;NG;GCT:GTT;A:V;)	amino acid mutations; create mode	GGCTCTCAAGCTTGCTTCGTGG			ENSFCAT00000001639	V	5
ENSFCAT00000001639|B3|+|124809404|124809449|5|(Target-AID;+;@17;NGG;GCT:GTT;A:V;)	amino acid mutations; create mode	AGGCTCTCAAGCTTGCTTCGTGG			ENSFCAT00000001639	V	5
ENSFCAT00000001647|D2|+|44806126|44806171|24|(Target-AID;+;@17;NG;GCC:GTC;A:V;)	amino acid mutations; create mode	AGGCCTCGCCTGTTGTGAAGAG			ENSFCAT00000001647	V	24
ENSFCAT00000001650|D2|+|44852684|44852729|121|(Target-AID;+;@18;NG;GTC:GTT;V:V;)	amino acid mutations; create mode	GTCACCATCCTGGTGACTGATG			ENSFCAT00000001650	V	121
ENSFCAT00000001669|E1|+|15898693|15898738|1|(ABE;+;@14;NG;ATG:GTG;M:V;)	amino acid mutations; create mode	GCACCCATGCTGCTGACGCTGG			ENSFCAT00000001669	V	1
ENSFCAT00000001802|C2|-|127526721|127526766|103|(Target-AID;-;@17;NG;TGC:TAC;C:Y;)	amino acid mutations; create mode	ATGCACTTCAGGGCGAAGATGG			ENSFCAT00000001802	Y	103
ENSFCAT00000001825|A3|+|29885509|29885554|20|(ABE;-;@14;NG;TAT:TAC;Y:Y;)	amino acid mutations; create mode	CAGCTCATATTTCCTGCCCGTG			ENSFCAT00000001825	Y	20
ENSFCAT00000001836|E1|+|4087830|4087875|32|(Target-AID;-;@19;NG;TGC:TAC;C:Y;)	amino acid mutations; create mode	GCATTTCAGACCAGTGGGCACG			ENSFCAT00000001836	Y	32
ENSFCAT00000001933|E1|-|49071934|49071979|11|(Target-AID;+;@17;NG;CAG:TAG;Q:*;)	amino acid mutations; create mode	AAGCAGCCCGCGGCTCCCGCTG			ENSFCAT00000001933	*	11
ENSFCAT00000001933|E1|-|49071934|49071979|11|(Target-AID;+;@19;NG;CAG:TAG;Q:*;)	amino acid mutations; create mode	GCAGCCCGCGGCTCCCGCTGCG			ENSFCAT00000001933	*	11
ENSFCAT00000001933|E1|-|49071934|49071979|11|(Target-AID;+;@19;NGG;CAG:TAG;Q:*;)	amino acid mutations; create mode	GCAGCCCGCGGCTCCCGCTGCGG			ENSFCAT00000001933	*	11
ENSFCAT00000000022|B3|+|66505575|66505620|7|(ABE;+;@13;NG;GCA:GCG;A:A;)	amino acid mutations; remove mode	GCAAGGCGAGAGAGGCTCCGAG			ENSFCAT00000000022	A	7
ENSFCAT00000000022|B3|+|66505575|66505620|7|(ABE;+;@14;NG;GCA:GCG;A:A;)	amino acid mutations; remove mode	CAAGGCGAGAGAGGCTCCGAGG			ENSFCAT00000000022	A	7
ENSFCAT00000000022|B3|+|66505575|66505620|7|(ABE;+;@13;NGG;GCA:GCG;A:A;)	amino acid mutations; remove mode	GCAAGGCGAGAGAGGCTCCGAGG			ENSFCAT00000000022	A	7
ENSFCAT00000000032|B1|+|176534476|176534521|41|(Target-AID;-;@17;NGG;GCG:ACG;A:T;)	amino acid mutations; remove mode	CCGTTTTGGAGTGCAACGTGCGG			ENSFCAT00000000032	T	41
ENSFCAT00000000032|B1|+|176534476|176534521|41|(Target-AID;-;@17;NG;GCG:ACG;A:T;)	amino acid mutations; remove mode	CCGTTTTGGAGTGCAACGTGCG			ENSFCAT00000000032	T	41
ENSFCAT00000000035|A3|+|121867704|121867749|9|(Target-AID;-;@18;NGG;GCG:ACG;A:T;)	amino acid mutations; remove mode	CGTCTTGAGGTGGACAAACAGGG			ENSFCAT00000000035	T	9
ENSFCAT00000000035|A3|+|121867704|121867749|9|(Target-AID;-;@17;NGG;GCG:ACG;A:T;)	amino acid mutations; remove mode	CCGTCTTGAGGTGGACAAACAGG			ENSFCAT00000000035	T	9
ENSFCAT00000000035|A3|+|121867704|121867749|9|(Target-AID;-;@19;NG;GCG:ACG;A:T;)	amino acid mutations; remove mode	GTCTTGAGGTGGACAAACAGGG			ENSFCAT00000000035	T	9
ENSFCAT00000000035|A3|+|121867704|121867749|9|(Target-AID;-;@18;NG;GCG:ACG;A:T;)	amino acid mutations; remove mode	CGTCTTGAGGTGGACAAACAGG			ENSFCAT00000000035	T	9
ENSFCAT00000000035|A3|+|121867704|121867749|9|(Target-AID;-;@17;NG;GCG:ACG;A:T;)	amino acid mutations; remove mode	CCGTCTTGAGGTGGACAAACAG			ENSFCAT00000000035	T	9
ENSFCAT00000000051|C1|-|8038656|8038701|11|(ABE;-;@13;NGG;GCT:GCC;A:A;)	amino acid mutations; remove mode	CCGACTGGGCCTTGGGCTCCCGG			ENSFCAT00000000051	A	11
ENSFCAT00000000051|C1|-|8038656|8038701|11|(ABE;-;@13;NG;GCT:GCC;A:A;)	amino acid mutations; remove mode	CCGACTGGGCCTTGGGCTCCCG			ENSFCAT00000000051	A	11
ENSFCAT00000000071|C1|-|8678436|8678481|5|(Target-AID;-;@18;NGG;GCG:ACG;A:T;)	amino acid mutations; remove mode	CGTCTTGGGGTCCATGTCACCGG			ENSFCAT00000000071	T	5
ENSFCAT00000000071|C1|-|8678436|8678481|5|(Target-AID;-;@19;NG;GCG:ACG;A:T;)	amino acid mutations; remove mode	GTCTTGGGGTCCATGTCACCGG			ENSFCAT00000000071	T	5
ENSFCAT00000000071|C1|-|8678436|8678481|5|(Target-AID;-;@18;NG;GCG:ACG;A:T;)	amino acid mutations; remove mode	CGTCTTGGGGTCCATGTCACCG			ENSFCAT00000000071	T	5
ENSFCAT00000000103|B2|+|32559460|32559505|22|(Target-AID;-;@18;NG;GCT:ACT;A:T;)	amino acid mutations; remove mode	AGTCTTGGGCTGAGGAAGAAGG			ENSFCAT00000000103	T	22
ENSFCAT00000000283|E2|-|11896138|11896183|14|(ABE;+;@14;NG;GAC:GGC;D:G;)	amino acid mutations; remove mode	CAAAGGGCCTCCTGCTCTCAGG			ENSFCAT00000000283	G	14
ENSFCAT00000000306|B4|+|81524104|81524149|57|(Target-AID;-;@18;NGG;GAG:GAA;E:E;)	amino acid mutations; remove mode	GCTTCCTTACAGCCCTCCGCCGG			ENSFCAT00000000306	E	57
ENSFCAT00000000306|B4|+|81524104|81524149|57|(Target-AID;-;@19;NG;GAG:GAA;E:E;)	amino acid mutations; remove mode	CTTCCTTACAGCCCTCCGCCGG			ENSFCAT00000000306	E	57
ENSFCAT00000000306|B4|+|81524104|81524149|57|(Target-AID;-;@18;NG;GAG:GAA;E:E;)	amino acid mutations; remove mode	GCTTCCTTACAGCCCTCCGCCG			ENSFCAT00000000306	E	57
ENSFCAT00000000337|A1|-|113569608|113569653|24|(Target-AID;-;@18;NG;GAA:AAA;E:K;)	amino acid mutations; remove mode	TTTCTTATATAATCCTGCAGAG			ENSFCAT00000000337	K	24
ENSFCAT00000000347|F1|-|50133171|50133216|16|(Target-AID;-;@17;NG;GAG:AAG;E:K;)	amino acid mutations; remove mode	CCTTCTTCTGGATGTTGTACTG			ENSFCAT00000000347	K	16
ENSFCAT00000000393|D4|+|95576070|95576115|39|(ABE;-;@13;NGG;TTT:TTC;F:F;)	amino acid mutations; remove mode	GCCCCAGGAACTGCGGCGAACGG			ENSFCAT00000000393	F	39
ENSFCAT00000000393|D4|+|95576070|95576115|39|(ABE;-;@13;NG;TTT:TTC;F:F;)	amino acid mutations; remove mode	GCCCCAGGAACTGCGGCGAACG			ENSFCAT00000000393	F	39
ENSFCAT00000000395|D4|-|95590800|95590845|7|(ABE;-;@13;NG;TTC:CTC;F:L;)	amino acid mutations; remove mode	AGCTGGAGCTTAGCCGTCTCTG			ENSFCAT00000000395	L	7
ENSFCAT00000000424|X|-|86496677|86496722|5|(ABE;-;@17;NG;TTC:TCC;F:S;)	amino acid mutations; remove mode	AAGGATTTCCCACTCATTGTTG			ENSFCAT00000000424	S	5
ENSFCAT00000000450|F1|+|42865860|42865905|46|(Target-AID;-;@17;NG;GGA:AGA;G:R;)	amino acid mutations; remove mode	CTCTCTTGGACCGGCTCTGCTG			ENSFCAT00000000450	R	46
ENSFCAT00000000454|F1|-|43305048|43305093|7|(Target-AID;-;@19;NG;GGG:AGG;G:R;)	amino acid mutations; remove mode	CTCTTGAAGATGTTCCTCATGG			ENSFCAT00000000454	R	7
ENSFCAT00000000474|A2|+|9116039|9116084|27|(Target-AID;-;@17;NGG;GGG:GAG;G:E;)	amino acid mutations; remove mode	GGCTCCTTGCGGCACACCGCAGG			ENSFCAT00000000474	E	27
ENSFCAT00000000474|A2|+|9116039|9116084|27|(Target-AID;-;@17;NG;GGG:GAG;G:E;)	amino acid mutations; remove mode	GGCTCCTTGCGGCACACCGCAG			ENSFCAT00000000474	E	27
ENSFCAT00000000475|A2|+|9138161|9138206|15|(Target-AID;-;@18;NGG;GGT:GAT;G:D;)	amino acid mutations; remove mode	AATCCTTCTAGAAGGCAAGGGGG			ENSFCAT00000000475	D	15
ENSFCAT00000000475|A2|+|9138161|9138206|15|(Target-AID;-;@18;NG;GGT:GAT;G:D;)	amino acid mutations; remove mode	AATCCTTCTAGAAGGCAAGGGG			ENSFCAT00000000475	D	15
ENSFCAT00000000479|A2|+|9208787|9208832|25|(Target-AID;-;@17;NGG;GGG:GAG;G:E;)	amino acid mutations; remove mode	TGCTCCTTGAAGTAGACGGTGGG			ENSFCAT00000000479	E	25
ENSFCAT00000000479|A2|+|9208787|9208832|25|(Target-AID;-;@17;NG;GGG:GAG;G:E;)	amino acid mutations; remove mode	TGCTCCTTGAAGTAGACGGTGG			ENSFCAT00000000479	E	25
ENSFCAT00000000498|F1|-|65935371|65935416|36|(Target-AID;-;@18;NG;GGA:GAA;G:E;)	amino acid mutations; remove mode	CTTCTTTGGCTGTGGTTCCCAG			ENSFCAT00000000498	E	36
ENSFCAT00000000538|A1|+|178735726|178735771|16|(Target-AID;-;@19;NGG;GGC:GAC;G:D;)	amino acid mutations; remove mode	GTCTTTGACCGAGAACGGCGTGG			ENSFCAT00000000538	D	16
ENSFCAT00000000538|A1|+|178735726|178735771|16|(Target-AID;-;@19;NG;GGC:GAC;G:D;)	amino acid mutations; remove mode	GTCTTTGACCGAGAACGGCGTG			ENSFCAT00000000538	D	16
ENSFCAT00000000541|C2|+|150687326|150687371|39|(Target-AID;-;@18;NG;GGT:GAT;G:D;)	amino acid mutations; remove mode	CATCTTTGACACCTTCCTCCAG			ENSFCAT00000000541	D	39
ENSFCAT00000000656|B3|-|35568810|35568855|16|(ABE;+;@15;NG;ATT:GTT;I:V;)	amino acid mutations; remove mode	CTAAGGTTCCCAAAATTAAGGG			ENSFCAT00000000656	V	16
ENSFCAT00000000656|B3|-|35568810|35568855|16|(ABE;+;@15;NGG;ATT:GTT;I:V;)	amino acid mutations; remove mode	CTAAGGTTCCCAAAATTAAGGGG			ENSFCAT00000000656	V	16
ENSFCAT00000000699|B4|+|112503460|112503505|102|(ABE;+;@17;NG;ATA:ATG;I:M;)	amino acid mutations; remove mode	AATGCCATGTGTGTTTGTGACG			ENSFCAT00000000699	M	102
ENSFCAT00000000699|B4|+|112503460|112503505|102|(ABE;+;@17;NGG;ATA:ATG;I:M;)	amino acid mutations; remove mode	AATGCCATGTGTGTTTGTGACGG			ENSFCAT00000000699	M	102
ENSFCAT00000000864|B2|+|153222409|153222454|13|(ABE;-;@15;NG;TTG:CTG;L:L;)	amino acid mutations; remove mode	GGCCAGCTTCCGCCGCTCCTCG			ENSFCAT00000000864	L	13
ENSFCAT00000000912|E1|+|20934157|20934202|45|(ABE;-;@14;NG;CTC:CCC;L:P;)	amino acid mutations; remove mode	ACAATGGGCCTGGAAGGAAATG			ENSFCAT00000000912	P	45
ENSFCAT00000000928|C2|+|68329945|68329990|26|(ABE;+;@16;NG;CTA:CTG;L:L;)	amino acid mutations; remove mode	AGCTGGGAATCTACTTCCAGAG			ENSFCAT00000000928	L	26
ENSFCAT00000000928|C2|+|68329945|68329990|26|(Target-AID;+;@18;NG;CTA:TTA;L:L;)	amino acid mutations; remove mode	AGCTGGGAATCTACTTCCAGAG			ENSFCAT00000000928	L	26
ENSFCAT00000000928|C2|+|68329945|68329990|26|(Target-AID;-;@19;NGG;TTG:TTA;L:L;)	amino acid mutations; remove mode	CCAGCTTCAAGCGTGTTCGGGGG			ENSFCAT00000000928	L	26
ENSFCAT00000000928|C2|+|68329945|68329990|26|(ABE;-;@16;NGG;TTG:CTG;L:L;)	amino acid mutations; remove mode	CCCAGCTTCAAGCGTGTTCGGGG			ENSFCAT00000000928	L	26
ENSFCAT00000000928|C2|+|68329945|68329990|26|(ABE;-;@15;NGG;TTG:CTG;L:L;)	amino acid mutations; remove mode	TCCCAGCTTCAAGCGTGTTCGGG			ENSFCAT00000000928	L	26
ENSFCAT00000000928|C2|+|68329945|68329990|26|(ABE;-;@14;NGG;TTG:CTG;L:L;)	amino acid mutations; remove mode	TTCCCAGCTTCAAGCGTGTTCGG			ENSFCAT00000000928	L	26
ENSFCAT00000000928|C2|+|68329945|68329990|26|(Target-AID;-;@19;NG;TTG:TTA;L:L;)	amino acid mutations; remove mode	CCAGCTTCAAGCGTGTTCGGGG			ENSFCAT00000000928	L	26
ENSFCAT00000000928|C2|+|68329945|68329990|26|(ABE;-;@16;NG;TTG:CTG;L:L;)	amino acid mutations; remove mode	CCCAGCTTCAAGCGTGTTCGGG			ENSFCAT00000000928	L	26
ENSFCAT00000000928|C2|+|68329945|68329990|26|(ABE;-;@15;NG;TTG:CTG;L:L;)	amino acid mutations; remove mode	TCCCAGCTTCAAGCGTGTTCGG			ENSFCAT00000000928	L	26
ENSFCAT00000000928|C2|+|68329945|68329990|26|(ABE;-;@14;NG;TTG:CTG;L:L;)	amino acid mutations; remove mode	TTCCCAGCTTCAAGCGTGTTCG			ENSFCAT00000000928	L	26
ENSFCAT00000000937|C2|-|68676482|68676527|55|(ABE;-;@14;NGG;CTG:CCG;L:P;)	amino acid mutations; remove mode	ACCCACGGCTTCAGATCTGGTGG			ENSFCAT00000000937	P	55
ENSFCAT00000000937|C2|-|68676482|68676527|55|(ABE;-;@15;NG;CTG:CCG;L:P;)	amino acid mutations; remove mode	CCCACGGCTTCAGATCTGGTGG			ENSFCAT00000000937	P	55
ENSFCAT00000000937|C2|-|68676482|68676527|55|(ABE;-;@14;NG;CTG:CCG;L:P;)	amino acid mutations; remove mode	ACCCACGGCTTCAGATCTGGTG			ENSFCAT00000000937	P	55
ENSFCAT00000000956|A2|+|146978855|146978900|19|(ABE;-;@15;NGG;CTC:CCC;L:P;)	amino acid mutations; remove mode	GCCAGGGCTTGAGTCGCACACGG			ENSFCAT00000000956	P	19
ENSFCAT00000000956|A2|+|146978855|146978900|19|(ABE;-;@15;NG;CTC:CCC;L:P;)	amino acid mutations; remove mode	GCCAGGGCTTGAGTCGCACACG			ENSFCAT00000000956	P	19
ENSFCAT00000000959|C1|-|222193097|222193142|38|(Target-AID;+;@17;NG;CTA:TTA;L:L;)	amino acid mutations; remove mode	AAGCTGTGCCAGAGCAGGATGG			ENSFCAT00000000959	L	38
ENSFCAT00000001057|A3|+|1785720|1785765|13|(ABE;+;@16;NG;AAC:GAC;N:D;)	amino acid mutations; remove mode	GAAGGACGTCCATGAGAACGAG			ENSFCAT00000001057	D	13
ENSFCAT00000001057|A3|+|1785720|1785765|13|(ABE;+;@17;NG;AAC:GAC;N:D;)	amino acid mutations; remove mode	AAGGACGTCCATGAGAACGAGG			ENSFCAT00000001057	D	13
ENSFCAT00000001057|A3|+|1785720|1785765|13|(ABE;+;@16;NGG;AAC:GAC;N:D;)	amino acid mutations; remove mode	GAAGGACGTCCATGAGAACGAGG			ENSFCAT00000001057	D	13
ENSFCAT00000001182|A3|+|587893|587938|100|(Target-AID;+;@17;NG;CCG:CTG;P:L;)	amino acid mutations; remove mode	AGCTGAGCCCCCCGCGAGGCCG			ENSFCAT00000001182	L	100
ENSFCAT00000001193|C1|-|92748365|92748410|31|(Target-AID;+;@17;NG;CCG:CTG;P:L;)	amino acid mutations; remove mode	AGCTGGATCGCAACGGGGACGG			ENSFCAT00000001193	L	31
ENSFCAT00000001220|A2|+|367368|367413|48|(Target-AID;-;@17;NG;CCG:CCA;P:P;)	amino acid mutations; remove mode	CCGTGGCTTGTTCTGGTCCCAG			ENSFCAT00000001220	P	48
ENSFCAT00000001221|X|-|45562131|45562176|184|(Target-AID;+;@18;NG;CCC:TCC;P:S;)	amino acid mutations; remove mode	AGTCCACACAGCCCCAGACAGG			ENSFCAT00000001221	S	184
ENSFCAT00000001232|D2|+|33541736|33541781|35|(Target-AID;+;@19;NG;CCC:CTC;P:L;)	amino acid mutations; remove mode	CTCAGTGACTATGTTGTGACAG			ENSFCAT00000001232	L	35
ENSFCAT00000001323|D3|+|21645589|21645634|20|(Target-AID;-;@17;NG;AGG:AAG;R:K;)	amino acid mutations; remove mode	TGCTTCTTCAGGTCAAGAAAGG			ENSFCAT00000001323	K	20
ENSFCAT00000001352|B3|+|144420368|144420413|53|(Target-AID;-;@18;NGG;AGG:AAG;R:K;)	amino acid mutations; remove mode	CCTTTTTCCAAAAGTAGGGAAGG			ENSFCAT00000001352	K	53
ENSFCAT00000001352|B3|+|144420368|144420413|53|(Target-AID;-;@18;NG;AGG:AAG;R:K;)	amino acid mutations; remove mode	CCTTTTTCCAAAAGTAGGGAAG			ENSFCAT00000001352	K	53
ENSFCAT00000001374|C2|+|155872659|155872704|10|(ABE;+;@16;NG;AGA:AGG;R:R;)	amino acid mutations; remove mode	AAAGGACGCCTGTAAAAGACCG			ENSFCAT00000001374	R	10
ENSFCAT00000001380|E3|-|20034238|20034283|132|(ABE;-;@16;NG;CGT:CGC;R:R;)	amino acid mutations; remove mode	CGAAGCGCTTGCGCAGGTACTG			ENSFCAT00000001380	R	132
ENSFCAT00000001392|X|+|41480068|41480113|3|(ABE;-;@14;NG;CGT:CGC;R:R;)	amino acid mutations; remove mode	TCTATGGCGTTTCATCCTGGAG			ENSFCAT00000001392	R	3
ENSFCAT00000001396|X|+|41652806|41652851|9|(Target-AID;-;@19;NGG;AGA:AAA;R:K;)	amino acid mutations; remove mode	TTTCTTGGACAGCGGCGAGCTGG			ENSFCAT00000001396	K	9
ENSFCAT00000001396|X|+|41652806|41652851|9|(Target-AID;-;@19;NG;AGA:AAA;R:K;)	amino acid mutations; remove mode	TTTCTTGGACAGCGGCGAGCTG			ENSFCAT00000001396	K	9
ENSFCAT00000001398|X|+|41676894|41676939|80|(Target-AID;-;@19;NG;AGG:AAG;R:K;)	amino acid mutations; remove mode	CTTCTTCATCCGATCCATGGCG			ENSFCAT00000001398	K	80
ENSFCAT00000001398|X|+|41676894|41676939|80|(Target-AID;-;@17;NG;AGG:AAG;R:K;)	amino acid mutations; remove mode	ATCTTCTTCATCCGATCCATGG			ENSFCAT00000001398	K	80
ENSFCAT00000001408|E1|-|29374271|29374316|41|(ABE;+;@17;NG;AGA:GGA;R:G;)	amino acid mutations; remove mode	AAAGGATGCACATCACAGGAGG			ENSFCAT00000001408	G	41
ENSFCAT00000001408|E1|-|29374271|29374316|41|(ABE;+;@17;NGG;AGA:GGA;R:G;)	amino acid mutations; remove mode	AAAGGATGCACATCACAGGAGGG			ENSFCAT00000001408	G	41
ENSFCAT00000001422|D2|-|57137865|57137910|62|(Target-AID;+;@17;NG;TCC:TCT;S:S;)	amino acid mutations; remove mode	GTCTTTTGCCCACCGCAGTGAG			ENSFCAT00000001422	S	62
ENSFCAT00000001449|A3|+|12609069|12609114|134|(ABE;-;@13;NG;TCT:CCT;S:P;)	amino acid mutations; remove mode	TCTGCAGGCTTCTGGTGTGGGG			ENSFCAT00000001449	P	134
ENSFCAT00000001460|B4|+|127266162|127266207|11|(ABE;+;@17;NG;AGC:GGC;S:G;)	amino acid mutations; remove mode	AAAGGCACCGATGTGTCTTCAG			ENSFCAT00000001460	G	11
ENSFCAT00000001513|D3|+|19412031|19412076|102|(ABE;+;@17;NG;ACA:ACG;T:T;)	amino acid mutations; remove mode	GACGGTGAGGCCAGTAGGCATG			ENSFCAT00000001513	T	102
ENSFCAT00000001513|D3|+|19412031|19412076|102|(ABE;+;@17;NGG;ACA:ACG;T:T;)	amino acid mutations; remove mode	GACGGTGAGGCCAGTAGGCATGG			ENSFCAT00000001513	T	102
ENSFCAT00000001538|A1|+|175374715|175374760|25|(ABE;+;@16;NG;ACC:GCC;T:A;)	amino acid mutations; remove mode	GAAAGCCCCTAAGGAGCATGAG			ENSFCAT00000001538	A	25
ENSFCAT00000001588|B3|-|137041703|137041748|23|(Target-AID;+;@18;NG;ACC:ACT;T:T;)	amino acid mutations; remove mode	ACTTTTGGCTCATTTGGAAGCG			ENSFCAT00000001588	T	23
ENSFCAT00000001588|B3|-|137041703|137041748|23|(Target-AID;+;@18;NGG;ACC:ACT;T:T;)	amino acid mutations; remove mode	ACTTTTGGCTCATTTGGAAGCGG			ENSFCAT00000001588	T	23
ENSFCAT00000001596|A2|-|6169462|6169507|8|(ABE;-;@14;NGG;GTG:GCG;V:A;)	amino acid mutations; remove mode	ACCACCGCCTTCAGCCCCGAGGG			ENSFCAT00000001596	A	8
ENSFCAT00000001596|A2|-|6169462|6169507|8|(ABE;-;@13;NGG;GTG:GCG;V:A;)	amino acid mutations; remove mode	CACCACCGCCTTCAGCCCCGAGG			ENSFCAT00000001596	A	8
ENSFCAT00000001596|A2|-|6169462|6169507|8|(ABE;-;@14;NG;GTG:GCG;V:A;)	amino acid mutations; remove mode	ACCACCGCCTTCAGCCCCGAGG			ENSFCAT00000001596	A	8
ENSFCAT00000001596|A2|-|6169462|6169507|8|(ABE;-;@13;NG;GTG:GCG;V:A;)	amino acid mutations; remove mode	CACCACCGCCTTCAGCCCCGAG			ENSFCAT00000001596	A	8
ENSFCAT00000001647|D2|+|44806126|44806171|24|(ABE;-;@14;NGG;GTC:GCC;V:A;)	amino acid mutations; remove mode	GGCGAGGCCTTGGTGAAAGCTGG			ENSFCAT00000001647	A	24
ENSFCAT00000001647|D2|+|44806126|44806171|24|(ABE;-;@15;NG;GTC:GCC;V:A;)	amino acid mutations; remove mode	GCGAGGCCTTGGTGAAAGCTGG			ENSFCAT00000001647	A	24
ENSFCAT00000001647|D2|+|44806126|44806171|24|(ABE;-;@14;NG;GTC:GCC;V:A;)	amino acid mutations; remove mode	GGCGAGGCCTTGGTGAAAGCTG			ENSFCAT00000001647	A	24
ENSFCAT00000001650|D2|+|44852684|44852729|121|(ABE;-;@16;NG;GTT:GTC;V:V;)	amino acid mutations; remove mode	TGGTGACTTTTTCTGCCACCTG			ENSFCAT00000001650	V	121
ENSFCAT00000001699|E1|+|31056338|31056383|14|(ABE;+;@13;NG;GTA:GTG;V:V;)	amino acid mutations; remove mode	TGAAGGTGAACACTTTACAAGG			ENSFCAT00000001699	V	14
ENSFCAT00000001699|E1|+|31056338|31056383|14|(ABE;+;@14;NG;GTA:GTG;V:V;)	amino acid mutations; remove mode	GAAGGTGAACACTTTACAAGGG			ENSFCAT00000001699	V	14
ENSFCAT00000001699|E1|+|31056338|31056383|14|(ABE;+;@13;NGG;GTA:GTG;V:V;)	amino acid mutations; remove mode	TGAAGGTGAACACTTTACAAGGG			ENSFCAT00000001699	V	14
ENSFCAT00000001802|C2|-|127526721|127526766|103|(ABE;+;@14;NG;TAC:TGC;Y:C;)	amino acid mutations; remove mode	TGAAGTGCATCCGCATAGGCAG			ENSFCAT00000001802	C	103
ENSFCAT00000001859|C1|-|106437558|106437603|5|(ABE;+;@16;NG;TAT:TGT;Y:C;)	amino acid mutations; remove mode	AAGTGTGAGAAGTGTGGACCGG			ENSFCAT00000001859	C	5
ENSFCAT00000001859|C1|-|106437558|106437603|5|(ABE;+;@17;NG;TAT:TGT;Y:C;)	amino acid mutations; remove mode	AGTGTGAGAAGTGTGGACCGGG			ENSFCAT00000001859	C	5
ENSFCAT00000001859|C1|-|106437558|106437603|5|(ABE;+;@16;NGG;TAT:TGT;Y:C;)	amino acid mutations; remove mode	AAGTGTGAGAAGTGTGGACCGGG			ENSFCAT00000001859	C	5
D1:103091582-103091582-|Target-AID|-|G:A|CGT:CAT|nucleotide|(Target-AID;-;@17;NGG;CGT:CAT;R:H;)	nucleotide mutations; create mode	TGACGTGGGGCTCGAACTTACGG	D1:103091582-103091582-	T
D1:103091582-103091582-|Target-AID|-|G:A|CGT:CAT|nucleotide|(Target-AID;-;@18;NG;CGT:CAT;R:H;)	nucleotide mutations; create mode	GACGTGGGGCTCGAACTTACGG	D1:103091582-103091582-	T
D1:103091582-103091582-|Target-AID|-|G:A|CGT:CAT|nucleotide|(Target-AID;-;@17;NG;CGT:CAT;R:H;)	nucleotide mutations; create mode	TGACGTGGGGCTCGAACTTACG	D1:103091582-103091582-	T
B4:48165261-48165261-|Target-AID|-|G:A|GGC:GAC|nucleotide|(Target-AID;-;@17;NG;GGC:GAC;G:D;)	nucleotide mutations; create mode	CTGCCTCATCTTTCTCTAATAG	B4:48165261-48165261-	T
D2:47407776-47407776+|Target-AID|-|G:A|GGC:GAC|nucleotide|(Target-AID;-;@17;NG;GGC:GAC;G:D;)	nucleotide mutations; create mode	TAGCCTGGATGATGGCTTGGAG	D2:47407776-47407776+	T
E1:22859651-22859651+|Target-AID|-|G:A|TGG:TAG|nucleotide|(Target-AID;-;@19;NGG;TGG:TAG;W:*;)	nucleotide mutations; create mode	CCAGGGCCAGTGTTAGGAGTGGG	E1:22859651-22859651+	T
E1:22859651-22859651+|Target-AID|-|G:A|TGG:TAG|nucleotide|(Target-AID;-;@19;NG;TGG:TAG;W:*;)	nucleotide mutations; create mode	CCAGGGCCAGTGTTAGGAGTGG	E1:22859651-22859651+	T
E2:8817111-8817111+|Target-AID|-|G:A|AGG:AAG|nucleotide|(Target-AID;-;@19;NG;AGG:AAG;R:K;)	nucleotide mutations; create mode	CCTGGATGCCAGAACCAGGGGG	E2:8817111-8817111+	T
B2:147518827-147518827-|Target-AID|-|G:A|AGG:AAG|nucleotide|(Target-AID;-;@19;NG;AGG:AAG;R:K;)	nucleotide mutations; create mode	CCTGTCCCTCCCGGCAGTGCTG	B2:147518827-147518827-	T
D3:10797014-10797014-|Target-AID|-|G:A|TGT:TAT|nucleotide|(Target-AID;-;@18;NGG;TGT:TAT;C:Y;)	nucleotide mutations; create mode	CACAGCATCGACGAGGTGCAGGG	D3:10797014-10797014-	T
D3:10797014-10797014-|Target-AID|-|G:A|TGT:TAT|nucleotide|(Target-AID;-;@19;NG;TGT:TAT;C:Y;)	nucleotide mutations; create mode	ACAGCATCGACGAGGTGCAGGG	D3:10797014-10797014-	T
D3:10797014-10797014-|Target-AID|-|G:A|TGT:TAT|nucleotide|(Target-AID;-;@18;NG;TGT:TAT;C:Y;)	nucleotide mutations; create mode	CACAGCATCGACGAGGTGCAGG	D3:10797014-10797014-	T
A1:113560467-113560467-|Target-AID|-|G:A|TGT:TAT|nucleotide|(Target-AID;-;@17;NG;TGT:TAT;C:Y;)	nucleotide mutations; create mode	AAACATTCTAAAAATTCTGAAG	A1:113560467-113560467-	T
B4:77857251-77857251-|Target-AID|-|G:A|AGA:AAA|nucleotide|(Target-AID;-;@17;NG;AGA:AAA;R:K;)	nucleotide mutations; create mode	CATCTCCCAAGTCAGCCCACCG	B4:77857251-77857251-	T
B4:42111545-42111545+|Target-AID|-|G:A|AGA:AAA|nucleotide|(Target-AID;-;@19;NG;AGA:AAA;R:K;)	nucleotide mutations; create mode	TCTGCTTTTGAAACAAGAACTG	B4:42111545-42111545+	T
A2:53954974-53954974+|Target-AID|-|G:A|AGC:AAC|nucleotide|(Target-AID;-;@17;NGG;AGC:AAC;S:N;)	nucleotide mutations; create mode	GGGCTCTAAGCACCCCCCCCAGG	A2:53954974-53954974+	T
A2:53954974-53954974+|Target-AID|-|G:A|AGC:AAC|nucleotide|(Target-AID;-;@18;NG;AGC:AAC;S:N;)	nucleotide mutations; create mode	GGCTCTAAGCACCCCCCCCAGG	A2:53954974-53954974+	T
A2:53954974-53954974+|Target-AID|-|G:A|AGC:AAC|nucleotide|(Target-AID;-;@17;NG;AGC:AAC;S:N;)	nucleotide mutations; create mode	GGGCTCTAAGCACCCCCCCCAG	A2:53954974-53954974+	T
B4:38184554-38184554+|Target-AID|-|G:A|AGC:AAC|nucleotide|(Target-AID;-;@17;NGG;AGC:AAC;S:N;)	nucleotide mutations; create mode	TTGCTGCCGCCCTAAGATGCGGG	B4:38184554-38184554+	T
B4:38184554-38184554+|Target-AID|-|G:A|AGC:AAC|nucleotide|(Target-AID;-;@18;NG;AGC:AAC;S:N;)	nucleotide mutations; create mode	TGCTGCCGCCCTAAGATGCGGG	B4:38184554-38184554+	T
B4:38184554-38184554+|Target-AID|-|G:A|AGC:AAC|nucleotide|(Target-AID;-;@17;NG;AGC:AAC;S:N;)	nucleotide mutations; create mode	TTGCTGCCGCCCTAAGATGCGG	B4:38184554-38184554+	T
B4:85616125-85616125+|Target-AID|-|G:A|AGC:AAC|nucleotide|(Target-AID;-;@18;NGG;AGC:AAC;S:N;)	nucleotide mutations; create mode	GGCTGCAAAAATGCACAATTGGG	B4:85616125-85616125+	T
B4:85616125-85616125+|Target-AID|-|G:A|AGC:AAC|nucleotide|(Target-AID;-;@17;NGG;AGC:AAC;S:N;)	nucleotide mutations; create mode	CGGCTGCAAAAATGCACAATTGG	B4:85616125-85616125+	T
B4:85616125-85616125+|Target-AID|-|G:A|AGC:AAC|nucleotide|(Target-AID;-;@19;NG;AGC:AAC;S:N;)	nucleotide mutations; create mode	GCTGCAAAAATGCACAATTGGG	B4:85616125-85616125+	T
B4:85616125-85616125+|Target-AID|-|G:A|AGC:AAC|nucleotide|(Target-AID;-;@18;NG;AGC:AAC;S:N;)	nucleotide mutations; create mode	GGCTGCAAAAATGCACAATTGG	B4:85616125-85616125+	T
B4:85616125-85616125+|Target-AID|-|G:A|AGC:AAC|nucleotide|(Target-AID;-;@17;NG;AGC:AAC;S:N;)	nucleotide mutations; create mode	CGGCTGCAAAAATGCACAATTG	B4:85616125-85616125+	T
D3:10867579-10867579-|Target-AID|-|G:A|AGC:AAC|nucleotide|(Target-AID;-;@19;NGG;AGC:AAC;S:N;)	nucleotide mutations; create mode	GCTGAGGCTAAAGGAAGGAATGG	D3:10867579-10867579-	T
D3:10867579-10867579-|Target-AID|-|G:A|AGC:AAC|nucleotide|(Target-AID;-;@19;NG;AGC:AAC;S:N;)	nucleotide mutations; create mode	GCTGAGGCTAAAGGAAGGAATG	D3:10867579-10867579-	T
B4:7055612-7055612+|Target-AID|-|G:A|TGA:TAA|nucleotide|(Target-AID;-;@17;NG;TGA:TAA;*:*;)	nucleotide mutations; create mode	TTTCAAAAGAAGAAAAAAGAAG	B4:7055612-7055612+	T
B4:81131585-81131585-|Target-AID|-|G:A|TGA:TAA|nucleotide|(Target-AID;-;@19;NGG;TGA:TAA;*:*;)	nucleotide mutations; create mode	TCAGATGACAAGGCCTTTGTGGG	B4:81131585-81131585-	T
B4:81131585-81131585-|Target-AID|-|G:A|TGA:TAA|nucleotide|(Target-AID;-;@18;NGG;TGA:TAA;*:*;)	nucleotide mutations; create mode	GTCAGATGACAAGGCCTTTGTGG	B4:81131585-81131585-	T
B4:81131585-81131585-|Target-AID|-|G:A|TGA:TAA|nucleotide|(Target-AID;-;@19;NG;TGA:TAA;*:*;)	nucleotide mutations; create mode	TCAGATGACAAGGCCTTTGTGG	B4:81131585-81131585-	T
B4:81131585-81131585-|Target-AID|-|G:A|TGA:TAA|nucleotide|(Target-AID;-;@18;NG;TGA:TAA;*:*;)	nucleotide mutations; create mode	GTCAGATGACAAGGCCTTTGTG	B4:81131585-81131585-	T
D1:88727094-88727094+|Target-AID|-|G:A|AGT:AAT|nucleotide|(Target-AID;-;@17;NG;AGT:AAT;S:N;)	nucleotide mutations; create mode	TGACTTCTGATTTCAGCTCAGG	D1:88727094-88727094+	T
D3:10954852-10954852-|Target-AID|-|G:A|GGT:GAT|nucleotide|(Target-AID;-;@17;NGG;GGT:GAT;G:D;)	nucleotide mutations; create mode	GAACCTCCAGCCCCATTCACGGG	D3:10954852-10954852-	T
D3:10954852-10954852-|Target-AID|-|G:A|GGT:GAT|nucleotide|(Target-AID;-;@17;NG;GGT:GAT;G:D;)	nucleotide mutations; create mode	GAACCTCCAGCCCCATTCACGG	D3:10954852-10954852-	T
D1:108615779-108615779-|Target-AID|-|G:A|CGC:CAC|nucleotide|(Target-AID;-;@19;NGG;CGC:CAC;R:H;)	nucleotide mutations; create mode	GCGAGGGCTGAGCAGGGCCCTGG	D1:108615779-108615779-	T
D1:108615779-108615779-|Target-AID|-|G:A|CGC:CAC|nucleotide|(Target-AID;-;@19;NG;CGC:CAC;R:H;)	nucleotide mutations; create mode	GCGAGGGCTGAGCAGGGCCCTG	D1:108615779-108615779-	T
F1:42683337-42683337-|Target-AID|-|G:A|TGC:TAC|nucleotide|(Target-AID;-;@19;NGG;TGC:TAC;C:Y;)	nucleotide mutations; create mode	GCAGGTCAGCCAGGGCGGGGTGG	F1:42683337-42683337-	T
F1:42683337-42683337-|Target-AID|-|G:A|TGC:TAC|nucleotide|(Target-AID;-;@19;NG;TGC:TAC;C:Y;)	nucleotide mutations; create mode	GCAGGTCAGCCAGGGCGGGGTG	F1:42683337-42683337-	T
F1:42683337-42683337-|Target-AID|-|G:A|TGC:TAC|nucleotide|(Target-AID;-;@17;NG;TGC:TAC;C:Y;)	nucleotide mutations; create mode	CAGCAGGTCAGCCAGGGCGGGG	F1:42683337-42683337-	T
X:86496008-86496008-|Target-AID|-|G:A|AGG:AAG|nucleotide|(Target-AID;-;@19;NG;AGG:AAG;R:K;)	nucleotide mutations; create mode	CCTTCTACCTTTTACGTGTGTG	X:86496008-86496008-	T
B4:84792581-84792581+|Target-AID|+|C:T|TCA:TTA|nucleotide|(Target-AID;+;@19;NG;TCA:TTA;S:L;)	nucleotide mutations; create mode	TCAGCTGAGGGTGACGTCATTG	B4:84792581-84792581+	T
B4:84792581-84792581+|Target-AID|+|C:T|TCA:TTA|nucleotide|(Target-AID;+;@19;NGG;TCA:TTA;S:L;)	nucleotide mutations; create mode	TCAGCTGAGGGTGACGTCATTGG	B4:84792581-84792581+	T
A2:82946956-82946956+|Target-AID|+|C:T|TCA:TTA|nucleotide|(Target-AID;+;@19;NG;TCA:TTA;S:L;)	nucleotide mutations; create mode	TCAATGGATTTAACTGAAAATG	A2:82946956-82946956+	T
C1:4361523-4361523-|Target-AID|+|C:T|TCA:TTA|nucleotide|(Target-AID;+;@18;NG;TCA:TTA;S:L;)	nucleotide mutations; create mode	ATCACTTAGGATCGTTTTCCCG	C1:4361523-4361523-	T
A1:241166876-241166876+|Target-AID|+|C:T|TCA:TTA|nucleotide|(Target-AID;+;@17;NG;TCA:TTA;S:L;)	nucleotide mutations; create mode	GGTCAGGCGCAGGGCGCGGGCG	A1:241166876-241166876+	T
A1:241166876-241166876+|Target-AID|+|C:T|TCA:TTA|nucleotide|(Target-AID;+;@19;NG;TCA:TTA;S:L;)	nucleotide mutations; create mode	TCAGGCGCAGGGCGCGGGCGCG	A1:241166876-241166876+	T
A1:241166876-241166876+|Target-AID|+|C:T|TCA:TTA|nucleotide|(Target-AID;+;@19;NGG;TCA:TTA;S:L;)	nucleotide mutations; create mode	TCAGGCGCAGGGCGCGGGCGCGG	A1:241166876-241166876+	T
A2:9350212-9350212-|Target-AID|+|C:T|ACT:ATT|nucleotide|(Target-AID;+;@18;NG;ACT:ATT;T:I;)	nucleotide mutations; create mode	AACTCCCCGGAAGAGGGACCAG	A2:9350212-9350212-	T
D2:73323928-73323928-|Target-AID|+|C:T|ACT:ATT|nucleotide|(Target-AID;+;@19;NG;ACT:ATT;T:I;)	nucleotide mutations; create mode	ACTACAGGTGGAGAGCACTAAG	D2:73323928-73323928-	T
D2:73449353-73449353-|Target-AID|+|C:T|ACT:ATT|nucleotide|(Target-AID;+;@19;NG;ACT:ATT;T:I;)	nucleotide mutations; create mode	ACTTGATTGGAGAACTTACAAG	D2:73449353-73449353-	T
B3:35559888-35559888-|Target-AID|+|C:T|GCT:GTT|nucleotide|(Target-AID;+;@17;NG;GCT:GTT;A:V;)	nucleotide mutations; create mode	ATGCTATTGAAGGAGATAGCAG	B3:35559888-35559888-	T
C1:4285079-4285079-|Target-AID|+|C:T|GCT:GTT|nucleotide|(Target-AID;+;@17;NG;GCT:GTT;A:V;)	nucleotide mutations; create mode	GAGCTCCCTGGGTAACTCGTGG	C1:4285079-4285079-	T
D1:109575119-109575119+|Target-AID|+|C:T|ACA:ATA|nucleotide|(Target-AID;+;@19;NG;ACA:ATA;T:I;)	nucleotide mutations; create mode	ACAGGGAGGGGCGGGGCCAAAG	D1:109575119-109575119+	T
A1:178810783-178810783-|Target-AID|+|C:T|ACA:ATA|nucleotide|(Target-AID;+;@17;NG;ACA:ATA;T:I;)	nucleotide mutations; create mode	AAACATTGATTAGGTTACATTG	A1:178810783-178810783-	T
A2:31526096-31526096-|Target-AID|+|C:T|ACA:ATA|nucleotide|(Target-AID;+;@19;NG;ACA:ATA;T:I;)	nucleotide mutations; create mode	ACATCTGAGGTTTATACAAAAG	A2:31526096-31526096-	T
D2:35057961-35057961-|Target-AID|+|C:T|ACA:ATA|nucleotide|(Target-AID;+;@18;NG;ACA:ATA;T:I;)	nucleotide mutations; create mode	CACAGTCAGGTTCTTCCTGTTG	D2:35057961-35057961-	T
B3:71470533-71470533-|Target-AID|+|C:T|ACA:ATA|nucleotide|(Target-AID;+;@17;NG;ACA:ATA;T:I;)	nucleotide mutations; create mode	TTACAAGCATGCCCCACGCCAG	B3:71470533-71470533-	T
B3:71470533-71470533-|Target-AID|+|C:T|ACA:ATA|nucleotide|(Target-AID;+;@19;NG;ACA:ATA;T:I;)	nucleotide mutations; create mode	ACAAGCATGCCCCACGCCAGTG	B3:71470533-71470533-	T
A1:176994584-176994584+|Target-AID|+|C:T|GCA:GTA|nucleotide|(Target-AID;+;@19;NG;GCA:GTA;A:V;)	nucleotide mutations; create mode	GCAGCCGGGCCTTGGGTTGCCG	A1:176994584-176994584+	T
C2:130014156-130014156-|Target-AID|+|C:T|CCA:CTA|nucleotide|(Target-AID;+;@19;NG;CCA:CTA;P:L;)	nucleotide mutations; create mode	CCAATAAAGGAAGATGGTAATG	C2:130014156-130014156-	T
D2:41974854-41974854+|Target-AID|+|C:T|CCA:CTA|nucleotide|(Target-AID;+;@19;NG;CCA:CTA;P:L;)	nucleotide mutations; create mode	CCAGGGTGAGGAGCCAGGGGTG	D2:41974854-41974854+	T
C1:16795047-16795047+|Target-AID|+|C:T|TCT:TTT|nucleotide|(Target-AID;+;@18;NG;TCT:TTT;S:F;)	nucleotide mutations; create mode	GTCTGCTGTAGGGGATCACAAG	C1:16795047-16795047+	T
C1:16795047-16795047+|Target-AID|+|C:T|TCT:TTT|nucleotide|(Target-AID;+;@19;NG;TCT:TTT;S:F;)	nucleotide mutations; create mode	TCTGCTGTAGGGGATCACAAGG	C1:16795047-16795047+	T
C1:16795047-16795047+|Target-AID|+|C:T|TCT:TTT|nucleotide|(Target-AID;+;@18;NGG;TCT:TTT;S:F;)	nucleotide mutations; create mode	GTCTGCTGTAGGGGATCACAAGG	C1:16795047-16795047+	T
A1:194961659-194961659-|Target-AID|+|C:T|TCT:TTT|nucleotide|(Target-AID;+;@19;NG;TCT:TTT;S:F;)	nucleotide mutations; create mode	TCTTGTCTCAGTTTTCCACAAG	A1:194961659-194961659-	T
A2:154697110-154697110-|Target-AID|+|C:T|TCT:TTT|nucleotide|(Target-AID;+;@18;NG;TCT:TTT;S:F;)	nucleotide mutations; create mode	TTCTGATTATCTAGTTGAACTG	A2:154697110-154697110-	T
A1:1618359-1618359+|Target-AID|+|C:T|TCT:TTT|nucleotide|(Target-AID;+;@18;NG;TCT:TTT;S:F;)	nucleotide mutations; create mode	CTCTACCCGCGTCCGGCTCCCG	A1:1618359-1618359+	T
A1:1618359-1618359+|Target-AID|+|C:T|TCT:TTT|nucleotide|(Target-AID;+;@19;NG;TCT:TTT;S:F;)	nucleotide mutations; create mode	TCTACCCGCGTCCGGCTCCCGG	A1:1618359-1618359+	T
A1:1618359-1618359+|Target-AID|+|C:T|TCT:TTT|nucleotide|(Target-AID;+;@18;NGG;TCT:TTT;S:F;)	nucleotide mutations; create mode	CTCTACCCGCGTCCGGCTCCCGG	A1:1618359-1618359+	T
B2:26025788-26025788+|Target-AID|+|C:T|GCG:GTG|nucleotide|(Target-AID;+;@19;NG;GCG:GTG;A:V;)	nucleotide mutations; create mode	GCGAGGGCCATCTCTGTAGAAG	B2:26025788-26025788+	T
B2:153222295-153222295+|Target-AID|+|C:T|GCG:GTG|nucleotide|(Target-AID;+;@17;NG;GCG:GTG;A:V;)	nucleotide mutations; create mode	GAGCGCGGGGCGGCCGGGCCCG	B2:153222295-153222295+	T
F2:75895285-75895285-|Target-AID|+|C:T|GCG:GTG|nucleotide|(Target-AID;+;@18;NG;GCG:GTG;A:V;)	nucleotide mutations; create mode	TGCGTAAAAACACATGCATGTG	F2:75895285-75895285-	T
D3:96134941-96134941+|Target-AID|+|C:T|CCG:CTG|nucleotide|(Target-AID;+;@19;NG;CCG:CTG;P:L;)	nucleotide mutations; create mode	CCGGCGAGCAGCGGGCCCGGCG	D3:96134941-96134941+	T
D3:96134941-96134941+|Target-AID|+|C:T|CCG:CTG|nucleotide|(Target-AID;+;@19;NGG;CCG:CTG;P:L;)	nucleotide mutations; create mode	CCGGCGAGCAGCGGGCCCGGCGG	D3:96134941-96134941+	T
E3:21795579-21795579-|Target-AID|+|C:T|ACA:ATA|nucleotide|(Target-AID;+;@19;NG;ACA:ATA;T:I;)	nucleotide mutations; create mode	ACATTTGCCTACCTCAAGGTTG	E3:21795579-21795579-	T
A2:2778534-2778534+|Target-AID|+|C:T|GCT:GTT|nucleotide|(Target-AID;+;@18;NG;GCT:GTT;A:V;)	nucleotide mutations; create mode	CGCTGGCCAGTACCGTTGCCGG	A2:2778534-2778534+	T
A2:2778534-2778534+|Target-AID|+|C:T|GCT:GTT|nucleotide|(Target-AID;+;@19;NG;GCT:GTT;A:V;)	nucleotide mutations; create mode	GCTGGCCAGTACCGTTGCCGGG	A2:2778534-2778534+	T
A2:2778534-2778534+|Target-AID|+|C:T|GCT:GTT|nucleotide|(Target-AID;+;@18;NGG;GCT:GTT;A:V;)	nucleotide mutations; create mode	CGCTGGCCAGTACCGTTGCCGGG	A2:2778534-2778534+	T
A3:39510089-39510089-|Target-AID|+|C:T|ACT:ATT|nucleotide|(Target-AID;+;@18;NG;ACT:ATT;T:I;)	nucleotide mutations; create mode	AACTACCTAACTTGATAAAGAG	A3:39510089-39510089-	T
E2:9306871-9306871-|Target-AID|+|C:T|ACG:ATG|nucleotide|(Target-AID;+;@19;NG;ACG:ATG;T:M;)	nucleotide mutations; create mode	ACGTTTCCATACTACCTCCCAG	E2:9306871-9306871-	T
E2:14336498-14336498+|ABE|+|A:G|TAG:TGG|nucleotide|(ABE;+;@16;NG;TAG:TGG;*:W;)	nucleotide mutations; create mode	TAATAGGTAAGGGGCCCCGAGG	E2:14336498-14336498+	G
E2:14336498-14336498+|ABE|+|A:G|TAG:TGG|nucleotide|(ABE;+;@16;NGG;TAG:TGG;*:W;)	nucleotide mutations; create mode	TAATAGGTAAGGGGCCCCGAGGG	E2:14336498-14336498+	G
E2:14302225-14302225+|ABE|+|A:G|CAC:CGC|nucleotide|(ABE;+;@13;NG;CAC:CGC;H:R;)	nucleotide mutations; create mode	TTCCCCCACTGGGGGGGCCTCG	E2:14302225-14302225+	G
E2:14302225-14302225+|ABE|+|A:G|CAC:CGC|nucleotide|(ABE;+;@14;NG;CAC:CGC;H:R;)	nucleotide mutations; create mode	TCCCCCACTGGGGGGGCCTCGG	E2:14302225-14302225+	G
E2:14302225-14302225+|ABE|+|A:G|CAC:CGC|nucleotide|(ABE;+;@16;NG;CAC:CGC;H:R;)	nucleotide mutations; create mode	CCCCACTGGGGGGGCCTCGGAG	E2:14302225-14302225+	G
E2:14302225-14302225+|ABE|+|A:G|CAC:CGC|nucleotide|(ABE;+;@13;NGG;CAC:CGC;H:R;)	nucleotide mutations; create mode	TTCCCCCACTGGGGGGGCCTCGG	E2:14302225-14302225+	G
D1:16537395-16537395+|ABE|+|A:G|CAC:CGC|nucleotide|(ABE;+;@14;NG;CAC:CGC;H:R;)	nucleotide mutations; create mode	GTTCGCACCCCGCGTGCACCTG	D1:16537395-16537395+	G
D1:16537395-16537395+|ABE|+|A:G|CAC:CGC|nucleotide|(ABE;+;@15;NG;CAC:CGC;H:R;)	nucleotide mutations; create mode	TTCGCACCCCGCGTGCACCTGG	D1:16537395-16537395+	G
D1:16537395-16537395+|ABE|+|A:G|CAC:CGC|nucleotide|(ABE;+;@17;NG;CAC:CGC;H:R;)	nucleotide mutations; create mode	CGCACCCCGCGTGCACCTGGTG	D1:16537395-16537395+	G
D1:16537395-16537395+|ABE|+|A:G|CAC:CGC|nucleotide|(ABE;+;@14;NGG;CAC:CGC;H:R;)	nucleotide mutations; create mode	GTTCGCACCCCGCGTGCACCTGG	D1:16537395-16537395+	G
B4:133271136-133271136-|ABE|+|A:G|CAT:CGT|nucleotide|(ABE;+;@14;NG;CAT:CGT;H:R;)	nucleotide mutations; create mode	GTTCCCATTAACTCACAGGGTG	B4:133271136-133271136-	G
B4:133271136-133271136-|ABE|+|A:G|CAT:CGT|nucleotide|(ABE;+;@15;NG;CAT:CGT;H:R;)	nucleotide mutations; create mode	TTCCCATTAACTCACAGGGTGG	B4:133271136-133271136-	G
B4:133271136-133271136-|ABE|+|A:G|CAT:CGT|nucleotide|(ABE;+;@14;NGG;CAT:CGT;H:R;)	nucleotide mutations; create mode	GTTCCCATTAACTCACAGGGTGG	B4:133271136-133271136-	G
B2:31894806-31894806+|ABE|+|A:G|GAG:GGG|nucleotide|(ABE;+;@17;NG;GAG:GGG;E:G;)	nucleotide mutations; create mode	CTGAGGTGACAAGTTAGTATTG	B2:31894806-31894806+	G
B3:64902991-64902991+|ABE|+|A:G|GAG:GGG|nucleotide|(ABE;+;@13;NG;GAG:GGG;E:G;)	nucleotide mutations; create mode	CCATGTGAGCCCAGCCTGGCTG	B3:64902991-64902991+	G
B3:64902991-64902991+|ABE|+|A:G|GAG:GGG|nucleotide|(ABE;+;@14;NG;GAG:GGG;E:G;)	nucleotide mutations; create mode	CATGTGAGCCCAGCCTGGCTGG	B3:64902991-64902991+	G
B3:64902991-64902991+|ABE|+|A:G|GAG:GGG|nucleotide|(ABE;+;@13;NGG;GAG:GGG;E:G;)	nucleotide mutations; create mode	CCATGTGAGCCCAGCCTGGCTGG	B3:64902991-64902991+	G
D3:6456628-6456628+|ABE|+|A:G|GAG:GGG|nucleotide|(ABE;+;@14;NG;GAG:GGG;E:G;)	nucleotide mutations; create mode	CCGGGGAGCAGGCTCCGGGCCG	D3:6456628-6456628+	G
A3:669413-669413-|ABE|+|A:G|GAG:GGG|nucleotide|(ABE;+;@13;NG;GAG:GGG;E:G;)	nucleotide mutations; create mode	GTGGGCGAGCGTGCAGAGCTGG	A3:669413-669413-	G
B2:122592340-122592340-|ABE|+|A:G|CAT:CGT|nucleotide|(ABE;+;@15;NG;CAT:CGT;H:R;)	nucleotide mutations; create mode	GAAGCATGCCCTTCTGCAAAGG	B2:122592340-122592340-	G
B2:122592340-122592340-|ABE|+|A:G|CAT:CGT|nucleotide|(ABE;+;@17;NG;CAT:CGT;H:R;)	nucleotide mutations; create mode	AGCATGCCCTTCTGCAAAGGAG	B2:122592340-122592340-	G
D2:62625340-62625340+|ABE|+|A:G|CAG:CGG|nucleotide|(ABE;+;@17;NG;CAG:CGG;Q:R;)	nucleotide mutations; create mode	CGCAGTCTTGCAGTGTCTTCCG	D2:62625340-62625340+	G
D2:62625340-62625340+|ABE|+|A:G|CAG:CGG|nucleotide|(ABE;+;@17;NGG;CAG:CGG;Q:R;)	nucleotide mutations; create mode	CGCAGTCTTGCAGTGTCTTCCGG	D2:62625340-62625340+	G
D2:62867157-62867157+|ABE|+|A:G|GAT:GGT|nucleotide|(ABE;+;@13;NG;GAT:GGT;D:G;)	nucleotide mutations; create mode	GACCCTGATGAAAAAATGGATG	D2:62867157-62867157+	G
D2:62867157-62867157+|ABE|+|A:G|GAT:GGT|nucleotide|(ABE;+;@14;NG;GAT:GGT;D:G;)	nucleotide mutations; create mode	ACCCTGATGAAAAAATGGATGG	D2:62867157-62867157+	G
D2:62867157-62867157+|ABE|+|A:G|GAT:GGT|nucleotide|(ABE;+;@15;NG;GAT:GGT;D:G;)	nucleotide mutations; create mode	CCCTGATGAAAAAATGGATGGG	D2:62867157-62867157+	G
D2:62867157-62867157+|ABE|+|A:G|GAT:GGT|nucleotide|(ABE;+;@13;NGG;GAT:GGT;D:G;)	nucleotide mutations; create mode	GACCCTGATGAAAAAATGGATGG	D2:62867157-62867157+	G
D2:62867157-62867157+|ABE|+|A:G|GAT:GGT|nucleotide|(ABE;+;@14;NGG;GAT:GGT;D:G;)	nucleotide mutations; create mode	ACCCTGATGAAAAAATGGATGGG	D2:62867157-62867157+	G
B2:3873701-3873701-|ABE|+|A:G|GAT:GGT|nucleotide|(ABE;+;@17;NG;GAT:GGT;D:G;)	nucleotide mutations; create mode	GGGATCTCCCACCACCTTCCTG	B2:3873701-3873701-	G
B2:3873701-3873701-|ABE|+|A:G|GAT:GGT|nucleotide|(ABE;+;@17;NGG;GAT:GGT;D:G;)	nucleotide mutations; create mode	GGGATCTCCCACCACCTTCCTGG	B2:3873701-3873701-	G
D3:21693546-21693546-|ABE|+|A:G|GAT:GGT|nucleotide|(ABE;+;@16;NG;GAT:GGT;D:G;)	nucleotide mutations; create mode	GGAGATGGTAATAGCACTTGTG	D3:21693546-21693546-	G
D4:65490065-65490065+|ABE|+|A:G|TAG:TGG|nucleotide|(ABE;+;@14;NG;TAG:TGG;*:W;)	nucleotide mutations; create mode	ATTGCTAGGTTTTACATTATAG	D4:65490065-65490065+	G
D4:65490065-65490065+|ABE|+|A:G|TAG:TGG|nucleotide|(ABE;+;@17;NG;TAG:TGG;*:W;)	nucleotide mutations; create mode	GCTAGGTTTTACATTATAGATG	D4:65490065-65490065+	G
D4:65490065-65490065+|ABE|+|A:G|TAG:TGG|nucleotide|(ABE;+;@17;NGG;TAG:TGG;*:W;)	nucleotide mutations; create mode	GCTAGGTTTTACATTATAGATGG	D4:65490065-65490065+	G
D1:110543484-110543484+|ABE|+|A:G|GAC:GGC|nucleotide|(ABE;+;@15;NG;GAC:GGC;D:G;)	nucleotide mutations; create mode	CCGGGACTCCAGCCTTCCTCAG	D1:110543484-110543484+	G
D1:110543484-110543484+|ABE|+|A:G|GAC:GGC|nucleotide|(ABE;+;@17;NG;GAC:GGC;D:G;)	nucleotide mutations; create mode	GGGACTCCAGCCTTCCTCAGTG	D1:110543484-110543484+	G
A3:85051042-85051042+|ABE|-|T:C|GTG:GCG|nucleotide|(ABE;-;@17;NGG;GTG:GCG;V:A;)	nucleotide mutations; create mode	TTCACTGTCCTGGGGATTGGGGG	A3:85051042-85051042+	G
A3:85051042-85051042+|ABE|-|T:C|GTG:GCG|nucleotide|(ABE;-;@16;NGG;GTG:GCG;V:A;)	nucleotide mutations; create mode	GTTCACTGTCCTGGGGATTGGGG	A3:85051042-85051042+	G
A3:85051042-85051042+|ABE|-|T:C|GTG:GCG|nucleotide|(ABE;-;@15;NGG;GTG:GCG;V:A;)	nucleotide mutations; create mode	CGTTCACTGTCCTGGGGATTGGG	A3:85051042-85051042+	G
A3:85051042-85051042+|ABE|-|T:C|GTG:GCG|nucleotide|(ABE;-;@14;NGG;GTG:GCG;V:A;)	nucleotide mutations; create mode	GCGTTCACTGTCCTGGGGATTGG	A3:85051042-85051042+	G
A3:85051042-85051042+|ABE|-|T:C|GTG:GCG|nucleotide|(ABE;-;@17;NG;GTG:GCG;V:A;)	nucleotide mutations; create mode	TTCACTGTCCTGGGGATTGGGG	A3:85051042-85051042+	G
A3:85051042-85051042+|ABE|-|T:C|GTG:GCG|nucleotide|(ABE;-;@16;NG;GTG:GCG;V:A;)	nucleotide mutations; create mode	GTTCACTGTCCTGGGGATTGGG	A3:85051042-85051042+	G
A3:85051042-85051042+|ABE|-|T:C|GTG:GCG|nucleotide|(ABE;-;@15;NG;GTG:GCG;V:A;)	nucleotide mutations; create mode	CGTTCACTGTCCTGGGGATTGG	A3:85051042-85051042+	G
A3:85051042-85051042+|ABE|-|T:C|GTG:GCG|nucleotide|(ABE;-;@14;NG;GTG:GCG;V:A;)	nucleotide mutations; create mode	GCGTTCACTGTCCTGGGGATTG	A3:85051042-85051042+	G
D4:88558560-88558560-|ABE|-|T:C|CTG:CCG|nucleotide|(ABE;-;@16;NG;CTG:CCG;L:P;)	nucleotide mutations; create mode	TCCCAGCTCAACCCTCTAAGAG	D4:88558560-88558560-	G
D4:88558560-88558560-|ABE|-|T:C|CTG:CCG|nucleotide|(ABE;-;@14;NG;CTG:CCG;L:P;)	nucleotide mutations; create mode	TTTCCCAGCTCAACCCTCTAAG	D4:88558560-88558560-	G
D3:19409046-19409046+|ABE|-|T:C|CTG:CCG|nucleotide|(ABE;-;@16;NG;CTG:CCG;L:P;)	nucleotide mutations; create mode	GCGCAGGGTCCGAGGTTGCGCG	D3:19409046-19409046+	G
D3:19409046-19409046+|ABE|-|T:C|CTG:CCG|nucleotide|(ABE;-;@14;NG;CTG:CCG;L:P;)	nucleotide mutations; create mode	GAGCGCAGGGTCCGAGGTTGCG	D3:19409046-19409046+	G
E2:8538853-8538853+|ABE|-|T:C|TTC:TCC|nucleotide|(ABE;-;@13;NG;TTC:TCC;F:S;)	nucleotide mutations; create mode	AGAGGGGAAAGACACAAGAGTG	E2:8538853-8538853+	G
E2:4223811-4223811-|ABE|-|T:C|CTC:CCC|nucleotide|(ABE;-;@14;NGG;CTC:CCC;L:P;)	nucleotide mutations; create mode	CGGCGGAGAGGGGCCGCACTTGG	E2:4223811-4223811-	G
E2:4223811-4223811-|ABE|-|T:C|CTC:CCC|nucleotide|(ABE;-;@14;NG;CTC:CCC;L:P;)	nucleotide mutations; create mode	CGGCGGAGAGGGGCCGCACTTG	E2:4223811-4223811-	G
A2:906235-906235-|ABE|-|T:C|CTC:CCC|nucleotide|(ABE;-;@14;NGG;CTC:CCC;L:P;)	nucleotide mutations; create mode	CGTCTGAGGTGTGCCGGGTCAGG	A2:906235-906235-	G
A2:906235-906235-|ABE|-|T:C|CTC:CCC|nucleotide|(ABE;-;@17;NG;CTC:CCC;L:P;)	nucleotide mutations; create mode	CTGAGGTGTGCCGGGTCAGGTG	A2:906235-906235-	G
A2:906235-906235-|ABE|-|T:C|CTC:CCC|nucleotide|(ABE;-;@15;NG;CTC:CCC;L:P;)	nucleotide mutations; create mode	GTCTGAGGTGTGCCGGGTCAGG	A2:906235-906235-	G
A2:906235-906235-|ABE|-|T:C|CTC:CCC|nucleotide|(ABE;-;@14;NG;CTC:CCC;L:P;)	nucleotide mutations; create mode	CGTCTGAGGTGTGCCGGGTCAG	A2:906235-906235-	G
B3:35721084-35721084-|ABE|-|T:C|CTC:CCC|nucleotide|(ABE;-;@14;NGG;CTC:CCC;L:P;)	nucleotide mutations; create mode	AGATTGAGGACAGACTAAACAGG	B3:35721084-35721084-	G
B3:35721084-35721084-|ABE|-|T:C|CTC:CCC|nucleotide|(ABE;-;@15;NG;CTC:CCC;L:P;)	nucleotide mutations; create mode	GATTGAGGACAGACTAAACAGG	B3:35721084-35721084-	G
B3:35721084-35721084-|ABE|-|T:C|CTC:CCC|nucleotide|(ABE;-;@14;NG;CTC:CCC;L:P;)	nucleotide mutations; create mode	AGATTGAGGACAGACTAAACAG	B3:35721084-35721084-	G
B1:162367215-162367215-|ABE|-|T:C|ATG:ACG|nucleotide|(ABE;-;@14;NG;ATG:ACG;M:T;)	nucleotide mutations; create mode	ATTTCCATGTAATTTGATAGTG	B1:162367215-162367215-	G
B2:18150715-18150715+|ABE|-|T:C|ATC:ACC|nucleotide|(ABE;-;@14;NG;ATC:ACC;I:T;)	nucleotide mutations; create mode	AATTGGATAGAGACAGAGAGAG	B2:18150715-18150715+	G
A3:39179211-39179211-|ABE|-|T:C|ATC:ACC|nucleotide|(ABE;-;@15;NG;ATC:ACC;I:T;)	nucleotide mutations; create mode	TCATGATCTCACAGTTTATGAG	A3:39179211-39179211-	G
B3:124488233-124488233-|ABE|-|T:C|GTG:GCG|nucleotide|(ABE;-;@15;NGG;GTG:GCG;V:A;)	nucleotide mutations; create mode	TTCTCACCACACACACAAAAGGG	B3:124488233-124488233-	G
B3:124488233-124488233-|ABE|-|T:C|GTG:GCG|nucleotide|(ABE;-;@14;NGG;GTG:GCG;V:A;)	nucleotide mutations; create mode	GTTCTCACCACACACACAAAAGG	B3:124488233-124488233-	G
B3:124488233-124488233-|ABE|-|T:C|GTG:GCG|nucleotide|(ABE;-;@15;NG;GTG:GCG;V:A;)	nucleotide mutations; create mode	TTCTCACCACACACACAAAAGG	B3:124488233-124488233-	G
B3:124488233-124488233-|ABE|-|T:C|GTG:GCG|nucleotide|(ABE;-;@14;NG;GTG:GCG;V:A;)	nucleotide mutations; create mode	GTTCTCACCACACACACAAAAG	B3:124488233-124488233-	G
A1:117107311-117107311-|ABE|-|T:C|ATA:ACA|nucleotide|(ABE;-;@15;NG;ATA:ACA;I:T;)	nucleotide mutations; create mode	TTAGTATCACAATGATTAGGAG	A1:117107311-117107311-	G
D2:13812755-13812755+|ABE|-|T:C|GTC:GCC|nucleotide|(ABE;-;@17;NG;GTC:GCC;V:A;)	nucleotide mutations; create mode	TGGACCTCTTCAGGCTGGAAAG	D2:13812755-13812755+	G
D2:13812755-13812755+|ABE|-|T:C|GTC:GCC|nucleotide|(ABE;-;@13;NG;GTC:GCC;V:A;)	nucleotide mutations; create mode	GGGTTGGACCTCTTCAGGCTGG	D2:13812755-13812755+	G
D1:112342157-112342157+|ABE|-|T:C|CTG:CCG|nucleotide|(ABE;-;@15;NGG;CTG:CCG;L:P;)	nucleotide mutations; create mode	CTGTCAGGGAGGCGGGGCCAGGG	D1:112342157-112342157+	G
D1:112342157-112342157+|ABE|-|T:C|CTG:CCG|nucleotide|(ABE;-;@14;NGG;CTG:CCG;L:P;)	nucleotide mutations; create mode	TCTGTCAGGGAGGCGGGGCCAGG	D1:112342157-112342157+	G
D1:112342157-112342157+|ABE|-|T:C|CTG:CCG|nucleotide|(ABE;-;@16;NG;CTG:CCG;L:P;)	nucleotide mutations; create mode	TGTCAGGGAGGCGGGGCCAGGG	D1:112342157-112342157+	G
D1:112342157-112342157+|ABE|-|T:C|CTG:CCG|nucleotide|(ABE;-;@15;NG;CTG:CCG;L:P;)	nucleotide mutations; create mode	CTGTCAGGGAGGCGGGGCCAGG	D1:112342157-112342157+	G
D1:112342157-112342157+|ABE|-|T:C|CTG:CCG|nucleotide|(ABE;-;@14;NG;CTG:CCG;L:P;)	nucleotide mutations; create mode	TCTGTCAGGGAGGCGGGGCCAG	D1:112342157-112342157+	G
F1:23205875-23205875+|ABE|-|T:C|CTG:CCG|nucleotide|(ABE;-;@15;NG;CTG:CCG;L:P;)	nucleotide mutations; create mode	GGCCCAGGTCATGATCTCACAG	F1:23205875-23205875+	G
B3:169437-169437+|ABE|-|T:C|CTA:CCA|nucleotide|(ABE;-;@15;NGG;CTA:CCA;L:P;)	nucleotide mutations; create mode	GGCGTAGCCTTCCCCGCGCGAGG	B3:169437-169437+	G
B3:169437-169437+|ABE|-|T:C|CTA:CCA|nucleotide|(ABE;-;@16;NG;CTA:CCA;L:P;)	nucleotide mutations; create mode	GCGTAGCCTTCCCCGCGCGAGG	B3:169437-169437+	G
B3:169437-169437+|ABE|-|T:C|CTA:CCA|nucleotide|(ABE;-;@15;NG;CTA:CCA;L:P;)	nucleotide mutations; create mode	GGCGTAGCCTTCCCCGCGCGAG	B3:169437-169437+	G
B3:169437-169437+|ABE|-|T:C|CTA:CCA|nucleotide|(ABE;-;@13;NG;CTA:CCA;L:P;)	nucleotide mutations; create mode	GCGGCGTAGCCTTCCCCGCGCG	B3:169437-169437+	G
D1:103091582-103091582-|ABE|+|A:G|CAT:CGT|nucleotide|(ABE;+;@14;NG;CAT:CGT;H:R;)	nucleotide mutations; remove mode	CCCCACGTCAGGCTCTGGGCTG	D1:103091582-103091582-	G
D1:103091582-103091582-|ABE|+|A:G|CAT:CGT|nucleotide|(ABE;+;@17;NG;CAT:CGT;H:R;)	nucleotide mutations; remove mode	CACGTCAGGCTCTGGGCTGATG	D1:103091582-103091582-	G
D1:103091582-103091582-|ABE|+|A:G|CAT:CGT|nucleotide|(ABE;+;@17;NGG;CAT:CGT;H:R;)	nucleotide mutations; remove mode	CACGTCAGGCTCTGGGCTGATGG	D1:103091582-103091582-	G
B4:48165261-48165261-|ABE|+|A:G|GAC:GGC|nucleotide|(ABE;+;@13;NG;GAC:GGC;D:G;)	nucleotide mutations; remove mode	AGATGAGGCAGACCATGTACAG	B4:48165261-48165261-	G
A1:145956226-145956226+|ABE|+|A:G|GAC:GGC|nucleotide|(ABE;+;@13;NG;GAC:GGC;D:G;)	nucleotide mutations; remove mode	GGGCAGGGCCGGGCCGGGCCGG	A1:145956226-145956226+	G
A1:145956226-145956226+|ABE|+|A:G|GAC:GGC|nucleotide|(ABE;+;@14;NG;GAC:GGC;D:G;)	nucleotide mutations; remove mode	GGCAGGGCCGGGCCGGGCCGGG	A1:145956226-145956226+	G
A1:145956226-145956226+|ABE|+|A:G|GAC:GGC|nucleotide|(ABE;+;@13;NGG;GAC:GGC;D:G;)	nucleotide mutations; remove mode	GGGCAGGGCCGGGCCGGGCCGGG	A1:145956226-145956226+	G
A1:145956226-145956226+|ABE|+|A:G|GAC:GGC|nucleotide|(ABE;+;@14;NGG;GAC:GGC;D:G;)	nucleotide mutations; remove mode	GGCAGGGCCGGGCCGGGCCGGGG	A1:145956226-145956226+	G
D2:47407776-47407776+|ABE|+|A:G|GAC:GGC|nucleotide|(ABE;+;@14;NG;GAC:GGC;D:G;)	nucleotide mutations; remove mode	ATCCAGGCTAGCGCTGAAGCTG	D2:47407776-47407776+	G
D2:47407776-47407776+|ABE|+|A:G|GAC:GGC|nucleotide|(ABE;+;@16;NG;GAC:GGC;D:G;)	nucleotide mutations; remove mode	CCAGGCTAGCGCTGAAGCTGTG	D2:47407776-47407776+	G
E2:8438229-8438229-|ABE|+|A:G|GAG:GGG|nucleotide|(ABE;+;@14;NG;GAG:GGG;E:G;)	nucleotide mutations; remove mode	ATGGAGGGGGGACAGGCGTTTG	E2:8438229-8438229-	G
E2:8438229-8438229-|ABE|+|A:G|GAG:GGG|nucleotide|(ABE;+;@15;NG;GAG:GGG;E:G;)	nucleotide mutations; remove mode	TGGAGGGGGGACAGGCGTTTGG	E2:8438229-8438229-	G
E2:8438229-8438229-|ABE|+|A:G|GAG:GGG|nucleotide|(ABE;+;@14;NGG;GAG:GGG;E:G;)	nucleotide mutations; remove mode	ATGGAGGGGGGACAGGCGTTTGG	E2:8438229-8438229-	G
B4:38157114-38157114-|ABE|+|A:G|GAG:GGG|nucleotide|(ABE;+;@16;NG;GAG:GGG;E:G;)	nucleotide mutations; remove mode	GTGGGGAGGAAGAAGGTGTGTG	B4:38157114-38157114-	G
B4:80926910-80926910-|ABE|+|A:G|GAG:GGG|nucleotide|(ABE;+;@16;NG;GAG:GGG;E:G;)	nucleotide mutations; remove mode	CCTGGGTAGGGTGTTCCCCATG	B4:80926910-80926910-	G
B4:81060555-81060555-|ABE|+|A:G|GAG:GGG|nucleotide|(ABE;+;@13;NG;GAG:GGG;E:G;)	nucleotide mutations; remove mode	TTATGAGGGGGGAGCCCTTGTG	B4:81060555-81060555-	G
B4:81060555-81060555-|ABE|+|A:G|GAG:GGG|nucleotide|(ABE;+;@15;NG;GAG:GGG;E:G;)	nucleotide mutations; remove mode	ATGAGGGGGGAGCCCTTGTGAG	B4:81060555-81060555-	G
C1:110700838-110700838+|ABE|+|A:G|GAG:GGG|nucleotide|(ABE;+;@13;NG;GAG:GGG;E:G;)	nucleotide mutations; remove mode	GGCCCAGGGCCTTCACCCTGAG	C1:110700838-110700838+	G
E3:5701800-5701800-|ABE|+|A:G|GAG:GGG|nucleotide|(ABE;+;@16;NG;GAG:GGG;E:G;)	nucleotide mutations; remove mode	GGGGGGTAAAATCTTTCTTTTG	E3:5701800-5701800-	G
X:20247127-20247127-|ABE|+|A:G|TAG:TGG|nucleotide|(ABE;+;@14;NG;TAG:TGG;*:W;)	nucleotide mutations; remove mode	GCTGATGGGACAGCAGGGGAAG	X:20247127-20247127-	G
X:20247127-20247127-|ABE|+|A:G|TAG:TGG|nucleotide|(ABE;+;@16;NG;TAG:TGG;*:W;)	nucleotide mutations; remove mode	TGATGGGACAGCAGGGGAAGAG	X:20247127-20247127-	G
E2:4510389-4510389+|ABE|+|A:G|TAG:TGG|nucleotide|(ABE;+;@17;NG;TAG:TGG;*:W;)	nucleotide mutations; remove mode	TTTGGGGATTTCTGTTTCCGTG	E2:4510389-4510389+	G
B1:176501604-176501604+|ABE|+|A:G|GAA:GGA|nucleotide|(ABE;+;@15;NG;GAA:GGA;E:G;)	nucleotide mutations; remove mode	CCAGGGAGGAGCCCCGCGTTTG	B1:176501604-176501604+	G
B1:176501604-176501604+|ABE|+|A:G|GAA:GGA|nucleotide|(ABE;+;@16;NG;GAA:GGA;E:G;)	nucleotide mutations; remove mode	CAGGGAGGAGCCCCGCGTTTGG	B1:176501604-176501604+	G
B1:176501604-176501604+|ABE|+|A:G|GAA:GGA|nucleotide|(ABE;+;@15;NGG;GAA:GGA;E:G;)	nucleotide mutations; remove mode	CCAGGGAGGAGCCCCGCGTTTGG	B1:176501604-176501604+	G
B4:81042066-81042066-|ABE|+|A:G|GAA:GGA|nucleotide|(ABE;+;@17;NG;GAA:GGA;E:G;)	nucleotide mutations; remove mode	CTGGAGCTCACTTCGAATTCTG	B4:81042066-81042066-	G
A3:121867602-121867602+|ABE|+|A:G|AAG:AGG|nucleotide|(ABE;+;@14;NG;AAG:AGG;K:R;)	nucleotide mutations; remove mode	GCAGGAGGAGGCGGCGAGGGAG	A3:121867602-121867602+	G
A3:121867602-121867602+|ABE|+|A:G|AAG:AGG|nucleotide|(ABE;+;@14;NGG;AAG:AGG;K:R;)	nucleotide mutations; remove mode	GCAGGAGGAGGCGGCGAGGGAGG	A3:121867602-121867602+	G
B4:77803644-77803644-|ABE|+|A:G|AAG:AGG|nucleotide|(ABE;+;@16;NG;AAG:AGG;K:R;)	nucleotide mutations; remove mode	CTCAGGTTTTCTCCCTGCCCAG	B4:77803644-77803644-	G
B4:80574697-80574697+|ABE|+|A:G|AAG:AGG|nucleotide|(ABE;+;@15;NG;AAG:AGG;K:R;)	nucleotide mutations; remove mode	CTCCAGGGCAGCAGCCCCCCCG	B4:80574697-80574697+	G
B4:80574697-80574697+|ABE|+|A:G|AAG:AGG|nucleotide|(ABE;+;@16;NG;AAG:AGG;K:R;)	nucleotide mutations; remove mode	TCCAGGGCAGCAGCCCCCCCGG	B4:80574697-80574697+	G
B4:80574697-80574697+|ABE|+|A:G|AAG:AGG|nucleotide|(ABE;+;@17;NG;AAG:AGG;K:R;)	nucleotide mutations; remove mode	CCAGGGCAGCAGCCCCCCCGGG	B4:80574697-80574697+	G
B4:80574697-80574697+|ABE|+|A:G|AAG:AGG|nucleotide|(ABE;+;@15;NGG;AAG:AGG;K:R;)	nucleotide mutations; remove mode	CTCCAGGGCAGCAGCCCCCCCGG	B4:80574697-80574697+	G
B4:80574697-80574697+|ABE|+|A:G|AAG:AGG|nucleotide|(ABE;+;@16;NGG;AAG:AGG;K:R;)	nucleotide mutations; remove mode	TCCAGGGCAGCAGCCCCCCCGGG	B4:80574697-80574697+	G
B4:80574697-80574697+|ABE|+|A:G|AAG:AGG|nucleotide|(ABE;+;@17;NGG;AAG:AGG;K:R;)	nucleotide mutations; remove mode	CCAGGGCAGCAGCCCCCCCGGGG	B4:80574697-80574697+	G
B4:80913831-80913831-|ABE|+|A:G|AAG:AGG|nucleotide|(ABE;+;@16;NG;AAG:AGG;K:R;)	nucleotide mutations; remove mode	CAGAGGCGAGGGGAGTGGTCTG	B4:80913831-80913831-	G
D1:110827265-110827265+|ABE|+|A:G|CAA:CGA|nucleotide|(ABE;+;@17;NG;CAA:CGA;Q:R;)	nucleotide mutations; remove mode	GGCGACGCCTCCCGCTGCCACG	D1:110827265-110827265+	G
B1:115818011-115818011-|ABE|+|A:G|TAT:TGT|nucleotide|(ABE;+;@16;NG;TAT:TGT;Y:C;)	nucleotide mutations; remove mode	TGTTGTCACAAGACACAGTGCG	B1:115818011-115818011-	G
D1:76106791-76106791-|ABE|+|A:G|TAT:TGT|nucleotide|(ABE;+;@14;NG;TAT:TGT;Y:C;)	nucleotide mutations; remove mode	TGAACTGTGTATTGTACTTGGG	D1:76106791-76106791-	G
A1:113560467-113560467-|ABE|+|A:G|TAT:TGT|nucleotide|(ABE;+;@15;NG;TAT:TGT;Y:C;)	nucleotide mutations; remove mode	AGAATGTTTAAGTCCCTAGAGG	A1:113560467-113560467-	G
B4:77857251-77857251-|ABE|+|A:G|AAA:AGA|nucleotide|(ABE;+;@13;NG;AAA:AGA;K:R;)	nucleotide mutations; remove mode	CTTGGGAGATGAAAGAAAATCG	B4:77857251-77857251-	G
A2:53984549-53984549-|ABE|+|A:G|AAA:AGA|nucleotide|(ABE;+;@17;NG;AAA:AGA;K:R;)	nucleotide mutations; remove mode	AGAGACCCCCCCCCACCAAAGG	A2:53984549-53984549-	G
B4:38184554-38184554+|ABE|+|A:G|AAC:AGC|nucleotide|(ABE;+;@13;NG;AAC:AGC;N:S;)	nucleotide mutations; remove mode	GGCGGCAGCAATAGCCAATGAG	B4:38184554-38184554+	G
B4:85616125-85616125+|ABE|+|A:G|AAC:AGC|nucleotide|(ABE;+;@13;NG;AAC:AGC;N:S;)	nucleotide mutations; remove mode	TTTTGCAGCCGGAGGCGGCTCG	B4:85616125-85616125+	G
B4:85616125-85616125+|ABE|+|A:G|AAC:AGC|nucleotide|(ABE;+;@14;NG;AAC:AGC;N:S;)	nucleotide mutations; remove mode	TTTGCAGCCGGAGGCGGCTCGG	B4:85616125-85616125+	G
B4:85616125-85616125+|ABE|+|A:G|AAC:AGC|nucleotide|(ABE;+;@16;NG;AAC:AGC;N:S;)	nucleotide mutations; remove mode	TGCAGCCGGAGGCGGCTCGGAG	B4:85616125-85616125+	G
B4:85616125-85616125+|ABE|+|A:G|AAC:AGC|nucleotide|(ABE;+;@13;NGG;AAC:AGC;N:S;)	nucleotide mutations; remove mode	TTTTGCAGCCGGAGGCGGCTCGG	B4:85616125-85616125+	G
E1:23616803-23616803+|ABE|+|A:G|AAC:AGC|nucleotide|(ABE;+;@15;NG;AAC:AGC;N:S;)	nucleotide mutations; remove mode	GTAGAGCTAAATGGGGTCGCGG	E1:23616803-23616803+	G
B4:80824570-80824570-|ABE|+|A:G|AAC:AGC|nucleotide|(ABE;+;@14;NG;AAC:AGC;N:S;)	nucleotide mutations; remove mode	ATCTGAGCTGTCTCAGGGCCTG	B4:80824570-80824570-	G
B4:80824570-80824570-|ABE|+|A:G|AAC:AGC|nucleotide|(ABE;+;@15;NG;AAC:AGC;N:S;)	nucleotide mutations; remove mode	TCTGAGCTGTCTCAGGGCCTGG	B4:80824570-80824570-	G
B4:80824570-80824570-|ABE|+|A:G|AAC:AGC|nucleotide|(ABE;+;@14;NGG;AAC:AGC;N:S;)	nucleotide mutations; remove mode	ATCTGAGCTGTCTCAGGGCCTGG	B4:80824570-80824570-	G
D3:10867579-10867579-|ABE|+|A:G|AAC:AGC|nucleotide|(ABE;+;@16;NG;AAC:AGC;N:S;)	nucleotide mutations; remove mode	CTCAGCGGCAAGCCGGACCCTG	D3:10867579-10867579-	G
D3:10867579-10867579-|ABE|+|A:G|AAC:AGC|nucleotide|(ABE;+;@16;NGG;AAC:AGC;N:S;)	nucleotide mutations; remove mode	CTCAGCGGCAAGCCGGACCCTGG	D3:10867579-10867579-	G
B4:81131585-81131585-|ABE|+|A:G|TAA:TGA|nucleotide|(ABE;+;@13;NG;TAA:TGA;*:*;)	nucleotide mutations; remove mode	GTCATCTGACTGCAGCTTCCTG	B4:81131585-81131585-	G
B4:81131585-81131585-|ABE|+|A:G|TAA:TGA|nucleotide|(ABE;+;@14;NG;TAA:TGA;*:*;)	nucleotide mutations; remove mode	TCATCTGACTGCAGCTTCCTGG	B4:81131585-81131585-	G
B4:81131585-81131585-|ABE|+|A:G|TAA:TGA|nucleotide|(ABE;+;@15;NG;TAA:TGA;*:*;)	nucleotide mutations; remove mode	CATCTGACTGCAGCTTCCTGGG	B4:81131585-81131585-	G
B4:81131585-81131585-|ABE|+|A:G|TAA:TGA|nucleotide|(ABE;+;@13;NGG;TAA:TGA;*:*;)	nucleotide mutations; remove mode	GTCATCTGACTGCAGCTTCCTGG	B4:81131585-81131585-	G
B4:81131585-81131585-|ABE|+|A:G|TAA:TGA|nucleotide|(ABE;+;@14;NGG;TAA:TGA;*:*;)	nucleotide mutations; remove mode	TCATCTGACTGCAGCTTCCTGGG	B4:81131585-81131585-	G
B3:33477728-33477728-|ABE|+|A:G|GAT:GGT|nucleotide|(ABE;+;@14;NG;GAT:GGT;D:G;)	nucleotide mutations; remove mode	CTTGAGGTGGACAGGGAGGCTG	B3:33477728-33477728-	G
B3:33477728-33477728-|ABE|+|A:G|GAT:GGT|nucleotide|(ABE;+;@15;NG;GAT:GGT;D:G;)	nucleotide mutations; remove mode	TTGAGGTGGACAGGGAGGCTGG	B3:33477728-33477728-	G
B3:33477728-33477728-|ABE|+|A:G|GAT:GGT|nucleotide|(ABE;+;@17;NG;GAT:GGT;D:G;)	nucleotide mutations; remove mode	GAGGTGGACAGGGAGGCTGGGG	B3:33477728-33477728-	G
B3:33477728-33477728-|ABE|+|A:G|GAT:GGT|nucleotide|(ABE;+;@14;NGG;GAT:GGT;D:G;)	nucleotide mutations; remove mode	CTTGAGGTGGACAGGGAGGCTGG	B3:33477728-33477728-	G
B3:33477728-33477728-|ABE|+|A:G|GAT:GGT|nucleotide|(ABE;+;@15;NGG;GAT:GGT;D:G;)	nucleotide mutations; remove mode	TTGAGGTGGACAGGGAGGCTGGG	B3:33477728-33477728-	G
A3:5952612-5952612-|ABE|+|A:G|TAA:TGA|nucleotide|(ABE;+;@15;NG;TAA:TGA;*:*;)	nucleotide mutations; remove mode	TTGGTGATTTTATCAAGTGATG	A3:5952612-5952612-	G
A3:5766236-5766236-|ABE|+|A:G|TAC:TGC|nucleotide|(ABE;+;@13;NG;TAC:TGC;Y:C;)	nucleotide mutations; remove mode	TACCACTGCCATGACCACACCG	A3:5766236-5766236-	G
A3:5766236-5766236-|ABE|+|A:G|TAC:TGC|nucleotide|(ABE;+;@16;NG;TAC:TGC;Y:C;)	nucleotide mutations; remove mode	CACTGCCATGACCACACCGATG	A3:5766236-5766236-	G
A3:5766236-5766236-|ABE|+|A:G|TAC:TGC|nucleotide|(ABE;+;@17;NG;TAC:TGC;Y:C;)	nucleotide mutations; remove mode	ACTGCCATGACCACACCGATGG	A3:5766236-5766236-	G
A3:5766236-5766236-|ABE|+|A:G|TAC:TGC|nucleotide|(ABE;+;@16;NGG;TAC:TGC;Y:C;)	nucleotide mutations; remove mode	CACTGCCATGACCACACCGATGG	A3:5766236-5766236-	G
A3:5766236-5766236-|ABE|+|A:G|TAC:TGC|nucleotide|(ABE;+;@17;NGG;TAC:TGC;Y:C;)	nucleotide mutations; remove mode	ACTGCCATGACCACACCGATGGG	A3:5766236-5766236-	G
F1:42865512-42865512+|ABE|+|A:G|GAA:GGA|nucleotide|(ABE;+;@16;NG;GAA:GGA;E:G;)	nucleotide mutations; remove mode	CGAGGAGGAGTGTCCTGGAGGG	F1:42865512-42865512+	G
A2:9134394-9134394+|ABE|-|T:C|GTG:GCG|nucleotide|(ABE;-;@13;NGG;GTG:GCG;V:A;)	nucleotide mutations; remove mode	GGGGACCGCGGCGGCGGCGGCGG	A2:9134394-9134394+	G
A2:9134394-9134394+|ABE|-|T:C|GTG:GCG|nucleotide|(ABE;-;@14;NG;GTG:GCG;V:A;)	nucleotide mutations; remove mode	GGGACCGCGGCGGCGGCGGCGG	A2:9134394-9134394+	G
A2:9134394-9134394+|ABE|-|T:C|GTG:GCG|nucleotide|(ABE;-;@13;NG;GTG:GCG;V:A;)	nucleotide mutations; remove mode	GGGGACCGCGGCGGCGGCGGCG	A2:9134394-9134394+	G
A2:9161655-9161655-|ABE|-|T:C|TTA:TCA|nucleotide|(ABE;-;@16;NGG;TTA:TCA;L:S;)	nucleotide mutations; remove mode	AGATGAGTAGACTGAGTCAGAGG	A2:9161655-9161655-	G
A2:9161655-9161655-|ABE|-|T:C|TTA:TCA|nucleotide|(ABE;-;@16;NG;TTA:TCA;L:S;)	nucleotide mutations; remove mode	AGATGAGTAGACTGAGTCAGAG	A2:9161655-9161655-	G
B4:84792581-84792581+|ABE|-|T:C|TTA:TCA|nucleotide|(ABE;-;@13;NG;TTA:TCA;L:S;)	nucleotide mutations; remove mode	CTCAGCTGATCCGGCCAATAAG	B4:84792581-84792581+	G
A2:9350212-9350212-|ABE|-|T:C|ATT:ACT|nucleotide|(ABE;-;@14;NGG;ATT:ACT;I:T;)	nucleotide mutations; remove mode	CGGGGAGTTCGCTCCAGAGCAGG	A2:9350212-9350212-	G
A2:9350212-9350212-|ABE|-|T:C|ATT:ACT|nucleotide|(ABE;-;@15;NG;ATT:ACT;I:T;)	nucleotide mutations; remove mode	GGGGAGTTCGCTCCAGAGCAGG	A2:9350212-9350212-	G
A2:9350212-9350212-|ABE|-|T:C|ATT:ACT|nucleotide|(ABE;-;@14;NG;ATT:ACT;I:T;)	nucleotide mutations; remove mode	CGGGGAGTTCGCTCCAGAGCAG	A2:9350212-9350212-	G
A2:9424111-9424111-|ABE|-|T:C|GTT:GCT|nucleotide|(ABE;-;@14;NGG;GTT:GCT;V:A;)	nucleotide mutations; remove mode	GCGGCAGCGAGGTGGGCCCGCGG	A2:9424111-9424111-	G
A2:9424111-9424111-|ABE|-|T:C|GTT:GCT|nucleotide|(ABE;-;@15;NG;GTT:GCT;V:A;)	nucleotide mutations; remove mode	CGGCAGCGAGGTGGGCCCGCGG	A2:9424111-9424111-	G
A2:9424111-9424111-|ABE|-|T:C|GTT:GCT|nucleotide|(ABE;-;@14;NG;GTT:GCT;V:A;)	nucleotide mutations; remove mode	GCGGCAGCGAGGTGGGCCCGCG	A2:9424111-9424111-	G
B3:35559888-35559888-|ABE|-|T:C|GTT:GCT|nucleotide|(ABE;-;@17;NG;GTT:GCT;V:A;)	nucleotide mutations; remove mode	ATAGCATGGACATGACATTAGG	B3:35559888-35559888-	G
C1:4285079-4285079-|ABE|-|T:C|GTT:GCT|nucleotide|(ABE;-;@13;NG;GTT:GCT;V:A;)	nucleotide mutations; remove mode	CCAGGGAGCTCTGCTTGCTGCG	C1:4285079-4285079-	G
E1:32801323-32801323+|ABE|-|T:C|GTT:GCT|nucleotide|(ABE;-;@14;NG;GTT:GCT;V:A;)	nucleotide mutations; remove mode	AAGTGAGCCCTGCAGATAGAAG	E1:32801323-32801323+	G
B1:115393260-115393260-|ABE|-|T:C|ATA:ACA|nucleotide|(ABE;-;@14;NG;ATA:ACA;I:T;)	nucleotide mutations; remove mode	GAGACTGTGAAACCAAAATCTG	B1:115393260-115393260-	G
B3:71470533-71470533-|ABE|-|T:C|ATA:ACA|nucleotide|(ABE;-;@15;NGG;ATA:ACA;I:T;)	nucleotide mutations; remove mode	TGCTTGTAAACCAGCTGTTCTGG	B3:71470533-71470533-	G
B3:71470533-71470533-|ABE|-|T:C|ATA:ACA|nucleotide|(ABE;-;@15;NG;ATA:ACA;I:T;)	nucleotide mutations; remove mode	TGCTTGTAAACCAGCTGTTCTG	B3:71470533-71470533-	G
D1:66860282-66860282+|ABE|-|T:C|CTC:CCC|nucleotide|(ABE;-;@17;NG;CTC:CCC;L:P;)	nucleotide mutations; remove mode	ACGGGCGAAGCGGCGGAGTGCG	D1:66860282-66860282+	G
D1:66860282-66860282+|ABE|-|T:C|CTC:CCC|nucleotide|(ABE;-;@13;NG;CTC:CCC;L:P;)	nucleotide mutations; remove mode	CGCGACGGGCGAAGCGGCGGAG	D1:66860282-66860282+	G
D3:21234964-21234964-|ABE|-|T:C|GTA:GCA|nucleotide|(ABE;-;@15;NG;GTA:GCA;V:A;)	nucleotide mutations; remove mode	AAAATGCTTCAGTGGTTGAGAG	D3:21234964-21234964-	G
A1:178788026-178788026-|ABE|-|T:C|CTA:CCA|nucleotide|(ABE;-;@14;NGG;CTA:CCA;L:P;)	nucleotide mutations; remove mode	ACAACTGGAGCAGACTGTGGAGG	A1:178788026-178788026-	G
A1:178788026-178788026-|ABE|-|T:C|CTA:CCA|nucleotide|(ABE;-;@15;NG;CTA:CCA;L:P;)	nucleotide mutations; remove mode	CAACTGGAGCAGACTGTGGAGG	A1:178788026-178788026-	G
A1:178788026-178788026-|ABE|-|T:C|CTA:CCA|nucleotide|(ABE;-;@14;NG;CTA:CCA;L:P;)	nucleotide mutations; remove mode	ACAACTGGAGCAGACTGTGGAG	A1:178788026-178788026-	G
C2:130014156-130014156-|ABE|-|T:C|CTA:CCA|nucleotide|(ABE;-;@13;NG;CTA:CCA;L:P;)	nucleotide mutations; remove mode	CTTTATTGGGGGGGGGGCAGGG	C2:130014156-130014156-	G
A1:194961659-194961659-|ABE|-|T:C|TTT:TCT|nucleotide|(ABE;-;@17;NG;TTT:TCT;F:S;)	nucleotide mutations; remove mode	CAAGAGTTTGGGGACAGTCAAG	A1:194961659-194961659-	G
D3:96347078-96347078+|ABE|-|T:C|CTT:CCT|nucleotide|(ABE;-;@14;NGG;CTT:CCT;L:P;)	nucleotide mutations; remove mode	GGCCCAGGCAGCGAAGGCGACGG	D3:96347078-96347078+	G
D3:96347078-96347078+|ABE|-|T:C|CTT:CCT|nucleotide|(ABE;-;@17;NG;CTT:CCT;L:P;)	nucleotide mutations; remove mode	CCAGGCAGCGAAGGCGACGGCG	D3:96347078-96347078+	G
D3:96347078-96347078+|ABE|-|T:C|CTT:CCT|nucleotide|(ABE;-;@15;NG;CTT:CCT;L:P;)	nucleotide mutations; remove mode	GCCCAGGCAGCGAAGGCGACGG	D3:96347078-96347078+	G
D3:96347078-96347078+|ABE|-|T:C|CTT:CCT|nucleotide|(ABE;-;@14;NG;CTT:CCT;L:P;)	nucleotide mutations; remove mode	GGCCCAGGCAGCGAAGGCGACG	D3:96347078-96347078+	G
B3:149167504-149167504+|ABE|-|T:C|CTT:CCT|nucleotide|(ABE;-;@16;NGG;CTT:CCT;L:P;)	nucleotide mutations; remove mode	CCGAGGGCCGCGGCGCGGGCGGG	B3:149167504-149167504+	G
B3:149167504-149167504+|ABE|-|T:C|CTT:CCT|nucleotide|(ABE;-;@15;NGG;CTT:CCT;L:P;)	nucleotide mutations; remove mode	ACCGAGGGCCGCGGCGCGGGCGG	B3:149167504-149167504+	G
B3:149167504-149167504+|ABE|-|T:C|CTT:CCT|nucleotide|(ABE;-;@16;NG;CTT:CCT;L:P;)	nucleotide mutations; remove mode	CCGAGGGCCGCGGCGCGGGCGG	B3:149167504-149167504+	G
B3:149167504-149167504+|ABE|-|T:C|CTT:CCT|nucleotide|(ABE;-;@15;NG;CTT:CCT;L:P;)	nucleotide mutations; remove mode	ACCGAGGGCCGCGGCGCGGGCG	B3:149167504-149167504+	G
B3:149167504-149167504+|ABE|-|T:C|CTT:CCT|nucleotide|(ABE;-;@13;NG;CTT:CCT;L:P;)	nucleotide mutations; remove mode	GGACCGAGGGCCGCGGCGCGGG	B3:149167504-149167504+	G
C1:122780102-122780102-|ABE|-|T:C|CTG:CCG|nucleotide|(ABE;-;@13;NG;CTG:CCG;L:P;)	nucleotide mutations; remove mode	CAACCACGGCACAACATACGGG	C1:122780102-122780102-	G
A1:1618359-1618359+|ABE|-|T:C|TTT:TCT|nucleotide|(ABE;-;@13;NGG;TTT:TCT;F:S;)	nucleotide mutations; remove mode	GCGGGTAGAGGCGCGGGCAGCGG	A1:1618359-1618359+	G
A1:1618359-1618359+|ABE|-|T:C|TTT:TCT|nucleotide|(ABE;-;@17;NG;TTT:TCT;F:S;)	nucleotide mutations; remove mode	GTAGAGGCGCGGGCAGCGGGCG	A1:1618359-1618359+	G
A1:1618359-1618359+|ABE|-|T:C|TTT:TCT|nucleotide|(ABE;-;@13;NG;TTT:TCT;F:S;)	nucleotide mutations; remove mode	GCGGGTAGAGGCGCGGGCAGCG	A1:1618359-1618359+	G
E2:15573770-15573770-|ABE|-|T:C|GTC:GCC|nucleotide|(ABE;-;@13;NGG;GTC:GCC;V:A;)	nucleotide mutations; remove mode	AGCACTGGCTCAGGAAGGGTGGG	E2:15573770-15573770-	G
E2:15573770-15573770-|ABE|-|T:C|GTC:GCC|nucleotide|(ABE;-;@13;NG;GTC:GCC;V:A;)	nucleotide mutations; remove mode	AGCACTGGCTCAGGAAGGGTGG	E2:15573770-15573770-	G
C2:68371673-68371673+|ABE|-|T:C|GTG:GCG|nucleotide|(ABE;-;@17;NG;GTG:GCG;V:A;)	nucleotide mutations; remove mode	TTCGCAGTATATATCAGTGCTG	C2:68371673-68371673+	G
A2:146977166-146977166+|ABE|-|T:C|CTG:CCG|nucleotide|(ABE;-;@14;NGG;CTG:CCG;L:P;)	nucleotide mutations; remove mode	GCTGACGGTCACTGTACATTTGG	A2:146977166-146977166+	G
A2:146977166-146977166+|ABE|-|T:C|CTG:CCG|nucleotide|(ABE;-;@17;NG;CTG:CCG;L:P;)	nucleotide mutations; remove mode	GACGGTCACTGTACATTTGGTG	A2:146977166-146977166+	G
A2:146977166-146977166+|ABE|-|T:C|CTG:CCG|nucleotide|(ABE;-;@15;NG;CTG:CCG;L:P;)	nucleotide mutations; remove mode	CTGACGGTCACTGTACATTTGG	A2:146977166-146977166+	G
A2:146977166-146977166+|ABE|-|T:C|CTG:CCG|nucleotide|(ABE;-;@14;NG;CTG:CCG;L:P;)	nucleotide mutations; remove mode	GCTGACGGTCACTGTACATTTG	A2:146977166-146977166+	G
A2:2778534-2778534+|ABE|-|T:C|GTT:GCT|nucleotide|(ABE;-;@16;NG;GTT:GCT;V:A;)	nucleotide mutations; remove mode	GCCAGCGCTGGCCTCCATCCAG	A2:2778534-2778534+	G
C2:68531977-68531977+|ABE|-|T:C|TTA:TCA|nucleotide|(ABE;-;@13;NG;TTA:TCA;L:S;)	nucleotide mutations; remove mode	AACGCATGAACCTAACTTTTCG	C2:68531977-68531977+	G
A2:12669161-12669161+|ABE|-|T:C|TTC:TCC|nucleotide|(ABE;-;@14;NG;TTC:TCC;F:S;)	nucleotide mutations; remove mode	GTGGTGGAGGGGGGGGACACGG	A2:12669161-12669161+	G
C1:92159832-92159832-|Target-AID|-|G:A|GGA:GAA|nucleotide|(Target-AID;-;@18;NG;GGA:GAA;G:E;)	nucleotide mutations; remove mode	CTTCCAAAGTCCACCAGAGGTG	C1:92159832-92159832-	T
B2:31894806-31894806+|Target-AID|-|G:A|GGG:GAG|nucleotide|(Target-AID;-;@19;NG;GGG:GAG;G:E;)	nucleotide mutations; remove mode	CTCAGTGTTCTTTGGAGAAAAG	B2:31894806-31894806+	T
B3:64902991-64902991+|Target-AID|-|G:A|GGG:GAG|nucleotide|(Target-AID;-;@17;NG;GGG:GAG;G:E;)	nucleotide mutations; remove mode	GGCTCACATGGCACCCGCCCCG	B3:64902991-64902991+	T
D3:6456628-6456628+|Target-AID|-|G:A|GGG:GAG|nucleotide|(Target-AID;-;@17;NGG;GGG:GAG;G:E;)	nucleotide mutations; remove mode	TGCTCCCCGGCGGGAGGAGGCGG	D3:6456628-6456628+	T
D3:6456628-6456628+|Target-AID|-|G:A|GGG:GAG|nucleotide|(Target-AID;-;@17;NG;GGG:GAG;G:E;)	nucleotide mutations; remove mode	TGCTCCCCGGCGGGAGGAGGCG	D3:6456628-6456628+	T
D1:16627072-16627072-|Target-AID|-|G:A|GGG:GAG|nucleotide|(Target-AID;-;@19;NGG;GGG:GAG;G:E;)	nucleotide mutations; remove mode	CTCTCCTCTCGTTCAGTCTTCGG	D1:16627072-16627072-	T
D1:16627072-16627072-|Target-AID|-|G:A|GGG:GAG|nucleotide|(Target-AID;-;@19;NG;GGG:GAG;G:E;)	nucleotide mutations; remove mode	CTCTCCTCTCGTTCAGTCTTCG	D1:16627072-16627072-	T
A3:669413-669413-|Target-AID|-|G:A|GGG:GAG|nucleotide|(Target-AID;-;@17;NG;GGG:GAG;G:E;)	nucleotide mutations; remove mode	CGCTCGCCCACGGCCTGGCCGG	A3:669413-669413-	T
B2:122592340-122592340-|Target-AID|-|G:A|CGT:CAT|nucleotide|(Target-AID;-;@17;NG;CGT:CAT;R:H;)	nucleotide mutations; remove mode	GCATGCTTCGTATAGTGTGGGG	B2:122592340-122592340-	T
D3:21276866-21276866-|Target-AID|-|G:A|GGA:GAA|nucleotide|(Target-AID;-;@17;NG;GGA:GAA;G:E;)	nucleotide mutations; remove mode	CCTTCTGTGGCTGCCTCATTTG	D3:21276866-21276866-	T
D4:56832593-56832593+|Target-AID|-|G:A|AGA:AAA|nucleotide|(Target-AID;-;@17;NGG;AGA:AAA;R:K;)	nucleotide mutations; remove mode	TCTTTTCACAGGAGGAAGGCAGG	D4:56832593-56832593+	T
D4:56832593-56832593+|Target-AID|-|G:A|AGA:AAA|nucleotide|(Target-AID;-;@17;NG;AGA:AAA;R:K;)	nucleotide mutations; remove mode	TCTTTTCACAGGAGGAAGGCAG	D4:56832593-56832593+	T
D2:62625340-62625340+|Target-AID|-|G:A|CGG:CAG|nucleotide|(Target-AID;-;@19;NG;CGG:CAG;R:Q;)	nucleotide mutations; remove mode	CTGCGGATCCCAAAAGGCCTTG	D2:62625340-62625340+	T
D1:62422030-62422030-|Target-AID|-|G:A|CGG:CAG|nucleotide|(Target-AID;-;@19;NG;CGG:CAG;R:Q;)	nucleotide mutations; remove mode	CTGCAGAGACAAAGTGGTTCAG	D1:62422030-62422030-	T
D2:62867157-62867157+|Target-AID|-|G:A|GGT:GAT|nucleotide|(Target-AID;-;@17;NG;GGT:GAT;G:D;)	nucleotide mutations; remove mode	TCATCAGGGTCGGGCACTTCTG	D2:62867157-62867157+	T
D3:21946062-21946062-|Target-AID|-|G:A|GGT:GAT|nucleotide|(Target-AID;-;@18;NG;GGT:GAT;G:D;)	nucleotide mutations; remove mode	CATCGCTCATTTTGACCCGACG	D3:21946062-21946062-	T
D4:56873383-56873383-|Target-AID|-|G:A|TGA:TAA|nucleotide|(Target-AID;-;@19;NG;TGA:TAA;*:*;)	nucleotide mutations; remove mode	TTACAGAGCCTACCCTGTCTTG	D4:56873383-56873383-	T
A1:118708546-118708546+|Target-AID|-|G:A|AGG:AAG|nucleotide|(Target-AID;-;@18;NG;AGG:AAG;R:K;)	nucleotide mutations; remove mode	CCTTCCCCCCGTCCCAGCAGCG	A1:118708546-118708546+	T
E1:2066622-2066622-|Target-AID|-|G:A|AGG:AAG|nucleotide|(Target-AID;-;@19;NG;AGG:AAG;R:K;)	nucleotide mutations; remove mode	CTTCAGCAGAATGTTTGCAGCG	E1:2066622-2066622-	T
E1:2066622-2066622-|Target-AID|-|G:A|AGG:AAG|nucleotide|(Target-AID;-;@17;NG;AGG:AAG;R:K;)	nucleotide mutations; remove mode	ATCTTCAGCAGAATGTTTGCAG	E1:2066622-2066622-	T
F2:22296364-22296364-|Target-AID|-|G:A|AGG:AAG|nucleotide|(Target-AID;-;@17;NG;AGG:AAG;R:K;)	nucleotide mutations; remove mode	ATCTTAGTAAAACTATCATCTG	F2:22296364-22296364-	T
A1:118951831-118951831+|Target-AID|-|G:A|TGG:TAG|nucleotide|(Target-AID;-;@17;NG;TGG:TAG;W:*;)	nucleotide mutations; remove mode	TTCTAAACGAGCTAAGGACTGG	A1:118951831-118951831+	T
X:41652704-41652704+|Target-AID|-|G:A|GGC:GAC|nucleotide|(Target-AID;-;@18;NG;GGC:GAC;G:D;)	nucleotide mutations; remove mode	TGTCTCCATTTTACAGAAGAGG	X:41652704-41652704+	T
B3:122458137-122458137-|Target-AID|+|C:T|CCC:CTC|nucleotide|(Target-AID;+;@17;NG;CCC:CTC;P:L;)	nucleotide mutations; remove mode	TACTCTTTTTCCAGAGTGACTG	B3:122458137-122458137-	T
D4:88371381-88371381-|Target-AID|+|C:T|CCT:CTT|nucleotide|(Target-AID;+;@17;NG;CCT:CTT;P:L;)	nucleotide mutations; remove mode	CTCTTCTCTGGGCTGCCCCAGG	D4:88371381-88371381-	T
D4:88558560-88558560-|Target-AID|+|C:T|CCG:CTG|nucleotide|(Target-AID;+;@17;NG;CCG:CTG;P:L;)	nucleotide mutations; remove mode	AGCTGGGAAATGGGGGGGGGGG	D4:88558560-88558560-	T
D4:88558560-88558560-|Target-AID|+|C:T|CCG:CTG|nucleotide|(Target-AID;+;@18;NG;CCG:CTG;P:L;)	nucleotide mutations; remove mode	GCTGGGAAATGGGGGGGGGGGG	D4:88558560-88558560-	T
D4:88558560-88558560-|Target-AID|+|C:T|CCG:CTG|nucleotide|(Target-AID;+;@17;NGG;CCG:CTG;P:L;)	nucleotide mutations; remove mode	AGCTGGGAAATGGGGGGGGGGGG	D4:88558560-88558560-	T
D4:88558560-88558560-|Target-AID|+|C:T|CCG:CTG|nucleotide|(Target-AID;+;@18;NGG;CCG:CTG;P:L;)	nucleotide mutations; remove mode	GCTGGGAAATGGGGGGGGGGGGG	D4:88558560-88558560-	T
D3:19409046-19409046+|Target-AID|+|C:T|CCG:CTG|nucleotide|(Target-AID;+;@19;NG;CCG:CTG;P:L;)	nucleotide mutations; remove mode	CTGCGCTCCCCACCCAATGCAG	D3:19409046-19409046+	T
E2:8543340-8543340-|Target-AID|+|C:T|GCT:GTT|nucleotide|(Target-AID;+;@19;NG;GCT:GTT;A:V;)	nucleotide mutations; remove mode	GTTCTGAGCAAGGGAGGGTCAG	E2:8543340-8543340-	T
X:45252932-45252932+|Target-AID|+|C:T|CCT:CTT|nucleotide|(Target-AID;+;@18;NG;CCT:CTT;P:L;)	nucleotide mutations; remove mode	CCTTGCCCCTTCGCTCTTGCAG	X:45252932-45252932+	T
E3:4722807-4722807+|Target-AID|+|C:T|CCT:CTT|nucleotide|(Target-AID;+;@19;NG;CCT:CTT;P:L;)	nucleotide mutations; remove mode	CTTCCAGCTTTTCCCCAGCTTG	E3:4722807-4722807+	T
E3:4722807-4722807+|Target-AID|+|C:T|CCT:CTT|nucleotide|(Target-AID;+;@19;NGG;CCT:CTT;P:L;)	nucleotide mutations; remove mode	CTTCCAGCTTTTCCCCAGCTTGG	E3:4722807-4722807+	T
A2:55371237-55371237-|Target-AID|+|C:T|CCT:CTT|nucleotide|(Target-AID;+;@17;NG;CCT:CTT;P:L;)	nucleotide mutations; remove mode	AGCTTTTAGTGGTTAAAAGGGG	A2:55371237-55371237-	T
A1:91993985-91993985-|Target-AID|+|C:T|CCT:CTT|nucleotide|(Target-AID;+;@17;NG;CCT:CTT;P:L;)	nucleotide mutations; remove mode	CTCTTCAGAAAAAGCCCATTTG	A1:91993985-91993985-	T
E2:4223811-4223811-|Target-AID|+|C:T|CCC:CTC|nucleotide|(Target-AID;+;@17;NG;CCC:CTC;P:L;)	nucleotide mutations; remove mode	CTCTCCGCCGGGGCTGATGGAG	E2:4223811-4223811-	T
D1:654223-654223-|Target-AID|+|C:T|ACG:ATG|nucleotide|(Target-AID;+;@19;NG;ACG:ATG;T:M;)	nucleotide mutations; remove mode	ATGCTTGTTTCCATATTCATTG	D1:654223-654223-	T
D1:654223-654223-|Target-AID|+|C:T|ACG:ATG|nucleotide|(Target-AID;+;@19;NGG;ACG:ATG;T:M;)	nucleotide mutations; remove mode	ATGCTTGTTTCCATATTCATTGG	D1:654223-654223-	T
B1:162367215-162367215-|Target-AID|+|C:T|ACG:ATG|nucleotide|(Target-AID;+;@17;NG;ACG:ATG;T:M;)	nucleotide mutations; remove mode	ACATGGAAATATAAATTAACAG	B1:162367215-162367215-	T
B2:18150715-18150715+|Target-AID|+|C:T|ACC:ATC|nucleotide|(Target-AID;+;@18;NG;ACC:ATC;T:I;)	nucleotide mutations; remove mode	TATCCAATTCATTTTTTAAGAG	B2:18150715-18150715+	T
B2:18150715-18150715+|Target-AID|+|C:T|ACC:ATC|nucleotide|(Target-AID;+;@18;NGG;ACC:ATC;T:I;)	nucleotide mutations; remove mode	TATCCAATTCATTTTTTAAGAGG	B2:18150715-18150715+	T
D2:44804031-44804031+|Target-AID|+|C:T|ACT:ATT|nucleotide|(Target-AID;+;@17;NG;ACT:ATT;T:I;)	nucleotide mutations; remove mode	ACATTCTTGAGAAGGCGAAAAG	D2:44804031-44804031+	T
D2:44804031-44804031+|Target-AID|+|C:T|ACT:ATT|nucleotide|(Target-AID;+;@17;NGG;ACT:ATT;T:I;)	nucleotide mutations; remove mode	ACATTCTTGAGAAGGCGAAAAGG	D2:44804031-44804031+	T
F1:23205875-23205875+|Target-AID|+|C:T|CCG:CTG|nucleotide|(Target-AID;+;@18;NG;CCG:CTG;P:L;)	nucleotide mutations; remove mode	CCTGGGCCGTGATTGAGAGTCG	F1:23205875-23205875+	T
F1:23205875-23205875+|Target-AID|+|C:T|CCG:CTG|nucleotide|(Target-AID;+;@18;NGG;CCG:CTG;P:L;)	nucleotide mutations; remove mode	CCTGGGCCGTGATTGAGAGTCGG	F1:23205875-23205875+	T
B3:169437-169437+|Target-AID|+|C:T|CCA:CTA|nucleotide|(Target-AID;+;@18;NG;CCA:CTA;P:L;)	nucleotide mutations; remove mode	GCTACGCCGCGGGCGCTGCGCG	B3:169437-169437+	T
B3:169437-169437+|Target-AID|+|C:T|CCA:CTA|nucleotide|(Target-AID;+;@19;NG;CCA:CTA;P:L;)	nucleotide mutations; remove mode	CTACGCCGCGGGCGCTGCGCGG	B3:169437-169437+	T
B3:169437-169437+|Target-AID|+|C:T|CCA:CTA|nucleotide|(Target-AID;+;@18;NGG;CCA:CTA;P:L;)	nucleotide mutations; remove mode	GCTACGCCGCGGGCGCTGCGCGG	B3:169437-169437+	T

## Sheet: Gallus gallus
guide: id	mutation format; mode of mutagenesis	guide+PAM sequence	genome coordinate	nucleotide mutation	transcript: id	amino acid mutation	aminoacid: position
ENSGALT00000000179|11|+|19064615|19064660|43|(Target-AID;+;@19;NG;GCC:GCT;A:A;)	amino acid mutations; create mode	CCGGGGGTCGTCCCGGTATCAG			ENSGALT00000000179	A	43
ENSGALT00000000190|26|+|1668321|1668366|10|(ABE;-;@16;NG;GTG:GCG;V:A;)	amino acid mutations; create mode	CTGCACCTTCTGGCCCTGCCCG			ENSGALT00000000190	A	10
ENSGALT00000000203|16|+|114746|114791|280|(ABE;-;@15;NGG;GTG:GCG;V:A;)	amino acid mutations; create mode	GCGTCACCTTGGGGGGCTCTGGG			ENSGALT00000000203	A	280
ENSGALT00000000203|16|+|114746|114791|280|(ABE;-;@14;NGG;GTG:GCG;V:A;)	amino acid mutations; create mode	AGCGTCACCTTGGGGGGCTCTGG			ENSGALT00000000203	A	280
ENSGALT00000000203|16|+|114746|114791|280|(ABE;-;@16;NG;GTG:GCG;V:A;)	amino acid mutations; create mode	CGTCACCTTGGGGGGCTCTGGG			ENSGALT00000000203	A	280
ENSGALT00000000203|16|+|114746|114791|280|(ABE;-;@15;NG;GTG:GCG;V:A;)	amino acid mutations; create mode	GCGTCACCTTGGGGGGCTCTGG			ENSGALT00000000203	A	280
ENSGALT00000000203|16|+|114746|114791|280|(ABE;-;@14;NG;GTG:GCG;V:A;)	amino acid mutations; create mode	AGCGTCACCTTGGGGGGCTCTG			ENSGALT00000000203	A	280
ENSGALT00000000304|26|+|901752|901797|9|(Target-AID;+;@19;NG;CGT:TGT;R:C;)	amino acid mutations; create mode	GCGTGCGAGCTCTGTGCTGCTG			ENSGALT00000000304	C	9
ENSGALT00000000546|26|+|1389254|1389299|3|(Target-AID;-;@17;NGG;GGC:GAC;G:D;)	amino acid mutations; create mode	TTGCCTTTCATGGCGGCGGCCGG			ENSGALT00000000546	D	3
ENSGALT00000000546|26|+|1389254|1389299|3|(Target-AID;-;@17;NG;GGC:GAC;G:D;)	amino acid mutations; create mode	TTGCCTTTCATGGCGGCGGCCG			ENSGALT00000000546	D	3
ENSGALT00000000626|8|-|4519574|4519619|32|(Target-AID;+;@17;NG;GAC:GAT;D:D;)	amino acid mutations; create mode	AGACAGTCTTTTATCCTCAGTG			ENSGALT00000000626	D	32
ENSGALT00000000644|28|+|662586|662631|14|(Target-AID;-;@17;NG;GGC:GAC;G:D;)	amino acid mutations; create mode	TAGCCCTTGTTGAGGCCGACGG			ENSGALT00000000644	D	14
ENSGALT00000000689|26|-|1531276|1531321|55|(Target-AID;+;@19;NG;GAC:GAT;D:D;)	amino acid mutations; create mode	ACGATGTCATCCACTGGCTCAG			ENSGALT00000000689	D	55
ENSGALT00000000689|26|-|1531276|1531321|55|(Target-AID;+;@19;NGG;GAC:GAT;D:D;)	amino acid mutations; create mode	ACGATGTCATCCACTGGCTCAGG			ENSGALT00000000689	D	55
ENSGALT00000000712|26|+|501027|501072|6|(Target-AID;+;@18;NG;GAC:GAT;D:D;)	amino acid mutations; create mode	GACATCATGACCAACTCGCACG			ENSGALT00000000712	D	6
ENSGALT00000000877|28|-|845901|845946|41|(Target-AID;-;@18;NG;GAG:GAA;E:E;)	amino acid mutations; create mode	CGCTCTTTGCCGCCCGCCGCCG			ENSGALT00000000877	E	41
ENSGALT00000000929|11|-|19177565|19177610|126|(Target-AID;-;@17;NG;GAG:GAA;E:E;)	amino acid mutations; create mode	TGTCTCCTTGGTCAGGAAGTTG			ENSGALT00000000929	E	126
ENSGALT00000000960|23|+|1423615|1423660|107|(Target-AID;+;@17;NG;CTC:TTC;L:F;)	amino acid mutations; create mode	AAACTCAACACCCAGTACCAGG			ENSGALT00000000960	F	107
ENSGALT00000000960|23|+|1423615|1423660|107|(Target-AID;+;@18;NG;CTC:TTC;L:F;)	amino acid mutations; create mode	AACTCAACACCCAGTACCAGGG			ENSGALT00000000960	F	107
ENSGALT00000000960|23|+|1423615|1423660|107|(Target-AID;+;@17;NGG;CTC:TTC;L:F;)	amino acid mutations; create mode	AAACTCAACACCCAGTACCAGGG			ENSGALT00000000960	F	107
ENSGALT00000000991|11|+|19285906|19285951|18|(Target-AID;+;@17;NG;TCC:TTC;S:F;)	amino acid mutations; create mode	AGTCCCAGCTCTCTGTGAAAGG			ENSGALT00000000991	F	18
ENSGALT00000000997|26|-|2232957|2233002|48|(Target-AID;+;@19;NG;TTC:TTT;F:F;)	amino acid mutations; create mode	TCATGACCATGGTGTTGGGTAG			ENSGALT00000000997	F	48
ENSGALT00000000997|26|-|2232957|2233002|48|(Target-AID;+;@19;NGG;TTC:TTT;F:F;)	amino acid mutations; create mode	TCATGACCATGGTGTTGGGTAGG			ENSGALT00000000997	F	48
ENSGALT00000001289|11|+|20040712|20040757|67|(ABE;+;@16;NG;GAG:GGG;E:G;)	amino acid mutations; create mode	AAGGAGGCGCCGGAGGAGGATG			ENSGALT00000001289	G	67
ENSGALT00000001297|26|+|2534975|2535020|45|(Target-AID;+;@17;NG;GGC:GGT;G:G;)	amino acid mutations; create mode	GGGCGGCCTGCAGATCCGGAAG			ENSGALT00000001297	G	45
ENSGALT00000001481|23|-|2291109|2291154|26|(ABE;-;@16;NG;TAC:CAC;Y:H;)	amino acid mutations; create mode	TAGTACTTAACGGCGGCCAGCG			ENSGALT00000001481	H	26
ENSGALT00000001495|17|-|10073624|10073669|9|(ABE;-;@16;NGG;TAC:CAC;Y:H;)	amino acid mutations; create mode	ACGTACTTGTCCAGGTCCAGCGG			ENSGALT00000001495	H	9
ENSGALT00000001495|17|-|10073624|10073669|9|(ABE;-;@17;NG;TAC:CAC;Y:H;)	amino acid mutations; create mode	CGTACTTGTCCAGGTCCAGCGG			ENSGALT00000001495	H	9
ENSGALT00000001495|17|-|10073624|10073669|9|(ABE;-;@16;NG;TAC:CAC;Y:H;)	amino acid mutations; create mode	ACGTACTTGTCCAGGTCCAGCG			ENSGALT00000001495	H	9
ENSGALT00000001495|17|-|10073624|10073669|9|(ABE;-;@14;NG;TAC:CAC;Y:H;)	amino acid mutations; create mode	CCACGTACTTGTCCAGGTCCAG			ENSGALT00000001495	H	9
ENSGALT00000001615|27|+|1291210|1291255|19|(Target-AID;-;@17;NG;GTC:ATC;V:I;)	amino acid mutations; create mode	AGACCTTTGTGCCATTGAAGAG			ENSGALT00000001615	I	19
ENSGALT00000001616|17|-|9927800|9927845|20|(Target-AID;-;@17;NG;GTC:ATC;V:I;)	amino acid mutations; create mode	AGACCTTGTCCCCGCAGACCGG			ENSGALT00000001616	I	20
ENSGALT00000001660|28|+|2482010|2482055|24|(Target-AID;+;@17;NG;ATC:ATT;I:I;)	amino acid mutations; create mode	AATCAAAGCCCTGCGTGCCAAG			ENSGALT00000001660	I	24
ENSGALT00000001693|17|+|9710225|9710270|24|(Target-AID;+;@17;NG;ACC:ATC;T:I;)	amino acid mutations; create mode	AAACCGAAGCAGCGGCCATCAG			ENSGALT00000001693	I	24
ENSGALT00000001790|24|+|1101665|1101710|38|(Target-AID;-;@18;NG;AAG:AAA;K:K;)	amino acid mutations; create mode	ATCTTCTTAGGCTCTCTGGATG			ENSGALT00000001790	K	38
ENSGALT00000001925|19|-|2682567|2682612|36|(Target-AID;-;@18;NG;GAA:AAA;E:K;)	amino acid mutations; create mode	TTCTTTACACTATGAGAAGATG			ENSGALT00000001925	K	36
ENSGALT00000002022|28|+|2701610|2701655|33|(Target-AID;+;@17;NG;TCA:TTA;S:L;)	amino acid mutations; create mode	AGTCACCACTGTCTCAAAGGAG			ENSGALT00000002022	L	33
ENSGALT00000002095|18|-|2730735|2730780|17|(Target-AID;+;@17;NG;TCA:TTA;S:L;)	amino acid mutations; create mode	AGTCATTTAGAGGTCAGAGCGG			ENSGALT00000002095	L	17
ENSGALT00000002095|18|-|2730735|2730780|17|(Target-AID;+;@18;NG;TCA:TTA;S:L;)	amino acid mutations; create mode	GTCATTTAGAGGTCAGAGCGGG			ENSGALT00000002095	L	17
ENSGALT00000002095|18|-|2730735|2730780|17|(Target-AID;+;@17;NGG;TCA:TTA;S:L;)	amino acid mutations; create mode	AGTCATTTAGAGGTCAGAGCGGG			ENSGALT00000002095	L	17
ENSGALT00000002097|10|-|2443333|2443378|3|(Target-AID;+;@19;NG;CTG:TTG;L:L;)	amino acid mutations; create mode	GCTGGAAGCTGTGGTCGAGCAG			ENSGALT00000002097	L	3
ENSGALT00000002116|11|-|824060|824105|93|(ABE;-;@17;NGG;TTC:CTC;F:L;)	amino acid mutations; create mode	AGAACTTCATGGGGAGCTGCAGG			ENSGALT00000002116	L	93
ENSGALT00000002116|11|-|824060|824105|93|(ABE;-;@17;NG;TTC:CTC;F:L;)	amino acid mutations; create mode	AGAACTTCATGGGGAGCTGCAG			ENSGALT00000002116	L	93
ENSGALT00000002121|10|+|2449180|2449225|12|(Target-AID;+;@17;NG;CTG:TTG;L:L;)	amino acid mutations; create mode	AAGCTGGCGGACCAGCCTCTGG			ENSGALT00000002121	L	12
ENSGALT00000002312|24|+|2545984|2546029|29|(Target-AID;+;@18;NG;ACG:ATG;T:M;)	amino acid mutations; create mode	AACGGAGGAGGGCAAGAAGGAG			ENSGALT00000002312	M	29
ENSGALT00000002423|27|+|4430762|4430807|18|(Target-AID;+;@18;NG;AAC:AAT;N:N;)	amino acid mutations; create mode	AACTGCGTGGCCATCGCCTCCG			ENSGALT00000002423	N	18
ENSGALT00000002520|22|-|1628882|1628927|100|(ABE;-;@15;NG;CTG:CCG;L:P;)	amino acid mutations; create mode	CCTCCAGCTTAGCGAGGAGCCG			ENSGALT00000002520	P	100
ENSGALT00000002567|8|-|4305441|4305486|18|(ABE;-;@14;NG;TCC:CCC;S:P;)	amino acid mutations; create mode	GGTGGGACTTGGAGCCATGGCG			ENSGALT00000002567	P	18
ENSGALT00000002634|26|-|3617991|3618036|39|(ABE;-;@15;NGG;TCC:CCC;S:P;)	amino acid mutations; create mode	GATGGATTTGGGGAAGGCATAGG			ENSGALT00000002634	P	39
ENSGALT00000002634|26|-|3617991|3618036|39|(ABE;-;@16;NG;TCC:CCC;S:P;)	amino acid mutations; create mode	ATGGATTTGGGGAAGGCATAGG			ENSGALT00000002634	P	39
ENSGALT00000002634|26|-|3617991|3618036|39|(ABE;-;@15;NG;TCC:CCC;S:P;)	amino acid mutations; create mode	GATGGATTTGGGGAAGGCATAG			ENSGALT00000002634	P	39
ENSGALT00000002654|9|+|1203946|1203991|41|(ABE;-;@17;NGG;CTC:CCC;L:P;)	amino acid mutations; create mode	ATGAGTTTCTGCGGCGAGCCCGG			ENSGALT00000002654	P	41
ENSGALT00000002654|9|+|1203946|1203991|41|(ABE;-;@17;NG;CTC:CCC;L:P;)	amino acid mutations; create mode	ATGAGTTTCTGCGGCGAGCCCG			ENSGALT00000002654	P	41
ENSGALT00000002673|10|-|2141179|2141224|35|(ABE;-;@17;NG;TCG:CCG;S:P;)	amino acid mutations; create mode	GCGACTTGACAAACCCAGCTAG			ENSGALT00000002673	P	35
ENSGALT00000002673|10|-|2141179|2141224|35|(ABE;-;@13;NG;TCG:CCG;S:P;)	amino acid mutations; create mode	ATGGGCGACTTGACAAACCCAG			ENSGALT00000002673	P	35
ENSGALT00000002682|28|+|1649195|1649240|52|(ABE;+;@14;NG;CCA:CCG;P:P;)	amino acid mutations; create mode	GAAGCCAGCTGACGATCCTAAG			ENSGALT00000002682	P	52
ENSGALT00000003195|21|+|2797451|2797496|10|(Target-AID;+;@17;NG;CCC:TCC;P:S;)	amino acid mutations; create mode	AAACCCACCGCTTCCCCCATCG			ENSGALT00000003195	S	10
ENSGALT00000003330|12|-|1473792|1473837|21|(ABE;-;@17;NGG;ATC:ACC;I:T;)	amino acid mutations; create mode	GTGATTTTGGGCCCGAGCGTGGG			ENSGALT00000003330	T	21
ENSGALT00000003330|12|-|1473792|1473837|21|(ABE;-;@16;NGG;ATC:ACC;I:T;)	amino acid mutations; create mode	GGTGATTTTGGGCCCGAGCGTGG			ENSGALT00000003330	T	21
ENSGALT00000003330|12|-|1473792|1473837|21|(ABE;-;@17;NG;ATC:ACC;I:T;)	amino acid mutations; create mode	GTGATTTTGGGCCCGAGCGTGG			ENSGALT00000003330	T	21
ENSGALT00000003330|12|-|1473792|1473837|21|(ABE;-;@16;NG;ATC:ACC;I:T;)	amino acid mutations; create mode	GGTGATTTTGGGCCCGAGCGTG			ENSGALT00000003330	T	21
ENSGALT00000003330|12|-|1473792|1473837|21|(ABE;-;@14;NG;ATC:ACC;I:T;)	amino acid mutations; create mode	TAGGTGATTTTGGGCCCGAGCG			ENSGALT00000003330	T	21
ENSGALT00000003332|13|-|3533239|3533284|15|(ABE;-;@17;NG;ATT:ACT;I:T;)	amino acid mutations; create mode	TCAATTTTATCTAAAAGAGAAG			ENSGALT00000003332	T	15
ENSGALT00000003500|11|-|1456302|1456347|25|(Target-AID;+;@17;NG;GCG:GTG;A:V;)	amino acid mutations; create mode	AGGCGGGCGTGCTGCGGCAGGG			ENSGALT00000003500	V	25
ENSGALT00000003500|11|-|1456302|1456347|25|(Target-AID;+;@19;NG;GCG:GTG;A:V;)	amino acid mutations; create mode	GCGGGCGTGCTGCGGCAGGGCG			ENSGALT00000003500	V	25
ENSGALT00000003543|12|-|1871917|1871962|26|(ABE;+;@16;NG;ATC:GTC;I:V;)	amino acid mutations; create mode	GAAGATCCAAAGGCTGTCGCTG			ENSGALT00000003543	V	26
ENSGALT00000003848|Z|-|9146294|9146339|28|(Target-AID;-;@18;NGG;TGC:TAC;C:Y;)	amino acid mutations; create mode	AGCACTGTGACGAAGAAGAAGGG			ENSGALT00000003848	Y	28
ENSGALT00000003848|Z|-|9146294|9146339|28|(Target-AID;-;@17;NGG;TGC:TAC;C:Y;)	amino acid mutations; create mode	GAGCACTGTGACGAAGAAGAAGG			ENSGALT00000003848	Y	28
ENSGALT00000003848|Z|-|9146294|9146339|28|(Target-AID;-;@18;NG;TGC:TAC;C:Y;)	amino acid mutations; create mode	AGCACTGTGACGAAGAAGAAGG			ENSGALT00000003848	Y	28
ENSGALT00000003848|Z|-|9146294|9146339|28|(Target-AID;-;@17;NG;TGC:TAC;C:Y;)	amino acid mutations; create mode	GAGCACTGTGACGAAGAAGAAG			ENSGALT00000003848	Y	28
ENSGALT00000003855|Z|+|9164907|9164952|28|(Target-AID;-;@17;NGG;TGC:TAC;C:Y;)	amino acid mutations; create mode	GAGCACTGCAATGAAGAAGAAGG			ENSGALT00000003855	Y	28
ENSGALT00000003855|Z|+|9164907|9164952|28|(Target-AID;-;@18;NG;TGC:TAC;C:Y;)	amino acid mutations; create mode	AGCACTGCAATGAAGAAGAAGG			ENSGALT00000003855	Y	28
ENSGALT00000003855|Z|+|9164907|9164952|28|(Target-AID;-;@17;NG;TGC:TAC;C:Y;)	amino acid mutations; create mode	GAGCACTGCAATGAAGAAGAAG			ENSGALT00000003855	Y	28
ENSGALT00000003983|Z|+|73116991|73117036|76|(Target-AID;+;@17;NG;CAG:TAG;Q:*;)	amino acid mutations; create mode	AAACAGGGAACAATATTCTTGG			ENSGALT00000003983	*	76
ENSGALT00000003983|Z|+|73116991|73117036|76|(Target-AID;+;@18;NG;CAG:TAG;Q:*;)	amino acid mutations; create mode	AACAGGGAACAATATTCTTGGG			ENSGALT00000003983	*	76
ENSGALT00000003983|Z|+|73116991|73117036|76|(Target-AID;+;@17;NGG;CAG:TAG;Q:*;)	amino acid mutations; create mode	AAACAGGGAACAATATTCTTGGG			ENSGALT00000003983	*	76
ENSGALT00000004047|13|-|1953354|1953399|29|(Target-AID;+;@17;NG;CAG:TAG;Q:*;)	amino acid mutations; create mode	AAGCAGCATGGATTCCACCTGG			ENSGALT00000004047	*	29
ENSGALT00000000303|26|-|908002|908047|7|(ABE;-;@14;NG;TGC:CGC;C:R;)	amino acid mutations; remove mode	GGGAGCGTTTCGGGGAGCACCG			ENSGALT00000000303	R	7
ENSGALT00000000304|26|+|901752|901797|9|(ABE;-;@15;NGG;TGT:CGT;C:R;)	amino acid mutations; remove mode	CGCACGCTTCCAGGTGCACCGGG			ENSGALT00000000304	R	9
ENSGALT00000000304|26|+|901752|901797|9|(ABE;-;@14;NGG;TGT:CGT;C:R;)	amino acid mutations; remove mode	TCGCACGCTTCCAGGTGCACCGG			ENSGALT00000000304	R	9
ENSGALT00000000304|26|+|901752|901797|9|(ABE;-;@15;NG;TGT:CGT;C:R;)	amino acid mutations; remove mode	CGCACGCTTCCAGGTGCACCGG			ENSGALT00000000304	R	9
ENSGALT00000000304|26|+|901752|901797|9|(ABE;-;@14;NG;TGT:CGT;C:R;)	amino acid mutations; remove mode	TCGCACGCTTCCAGGTGCACCG			ENSGALT00000000304	R	9
ENSGALT00000000559|27|+|2537874|2537919|28|(ABE;+;@13;NG;GAT:GGT;D:G;)	amino acid mutations; remove mode	CACTAGGGTCCATTAAATAGCG			ENSGALT00000000559	G	28
ENSGALT00000000626|8|-|4519574|4519619|32|(ABE;-;@14;NG;GAT:GAC;D:D;)	amino acid mutations; remove mode	AAGACTGTCTTTACAAAAGACG			ENSGALT00000000626	D	32
ENSGALT00000000816|27|+|3015466|3015511|5|(Target-AID;-;@19;NGG;GAA:AAA;E:K;)	amino acid mutations; remove mode	TTCTTGAGCGGCATGGCGCGGGG			ENSGALT00000000816	K	5
ENSGALT00000000816|27|+|3015466|3015511|5|(Target-AID;-;@18;NGG;GAA:AAA;E:K;)	amino acid mutations; remove mode	TTTCTTGAGCGGCATGGCGCGGG			ENSGALT00000000816	K	5
ENSGALT00000000816|27|+|3015466|3015511|5|(Target-AID;-;@19;NG;GAA:AAA;E:K;)	amino acid mutations; remove mode	TTCTTGAGCGGCATGGCGCGGG			ENSGALT00000000816	K	5
ENSGALT00000000816|27|+|3015466|3015511|5|(Target-AID;-;@18;NG;GAA:AAA;E:K;)	amino acid mutations; remove mode	TTTCTTGAGCGGCATGGCGCGG			ENSGALT00000000816	K	5
ENSGALT00000000877|28|-|845901|845946|41|(ABE;+;@15;NG;GAA:GAG;E:E;)	amino acid mutations; remove mode	AAAGAGCGGCGGGCGCAGTTCG			ENSGALT00000000877	E	41
ENSGALT00000000909|21|-|560128|560173|193|(Target-AID;-;@19;NG;GAG:AAG;E:K;)	amino acid mutations; remove mode	TTCTTCTCCGGGAGGGGCTCCG			ENSGALT00000000909	K	193
ENSGALT00000000991|11|+|19285906|19285951|18|(ABE;-;@15;NG;TTC:TCC;F:S;)	amino acid mutations; remove mode	GCTGGGACTTCTCGCAGGGCAG			ENSGALT00000000991	S	18
ENSGALT00000001229|1|+|193796543|193796588|116|(ABE;+;@16;NG;GGA:GGG;G:G;)	amino acid mutations; remove mode	AAGGGGCAGCCCCTCCGATCCG			ENSGALT00000001229	G	116
ENSGALT00000001229|1|+|193796543|193796588|116|(ABE;+;@17;NG;GGA:GGG;G:G;)	amino acid mutations; remove mode	AGGGGCAGCCCCTCCGATCCGG			ENSGALT00000001229	G	116
ENSGALT00000001229|1|+|193796543|193796588|116|(ABE;+;@16;NGG;GGA:GGG;G:G;)	amino acid mutations; remove mode	AAGGGGCAGCCCCTCCGATCCGG			ENSGALT00000001229	G	116
ENSGALT00000001229|1|+|193796543|193796588|116|(ABE;+;@17;NGG;GGA:GGG;G:G;)	amino acid mutations; remove mode	AGGGGCAGCCCCTCCGATCCGGG			ENSGALT00000001229	G	116
ENSGALT00000001245|11|+|20006596|20006641|30|(Target-AID;-;@18;NG;GGA:GAA;G:E;)	amino acid mutations; remove mode	ATTCCTTTTGAATCATCTCACG			ENSGALT00000001245	E	30
ENSGALT00000001315|2|+|98546610|98546655|42|(Target-AID;-;@17;NGG;GGT:AGT;G:S;)	amino acid mutations; remove mode	CACTCTTCTCTAAGGAGCGGGGG			ENSGALT00000001315	S	42
ENSGALT00000001315|2|+|98546610|98546655|42|(Target-AID;-;@17;NG;GGT:AGT;G:S;)	amino acid mutations; remove mode	CACTCTTCTCTAAGGAGCGGGG			ENSGALT00000001315	S	42
ENSGALT00000001353|26|-|2584994|2585039|20|(Target-AID;-;@17;NGG;GGT:AGT;G:S;)	amino acid mutations; remove mode	TACTTTTTGCAGATTCAGCTGGG			ENSGALT00000001353	S	20
ENSGALT00000001353|26|-|2584994|2585039|20|(Target-AID;-;@18;NG;GGT:AGT;G:S;)	amino acid mutations; remove mode	ACTTTTTGCAGATTCAGCTGGG			ENSGALT00000001353	S	20
ENSGALT00000001353|26|-|2584994|2585039|20|(Target-AID;-;@17;NG;GGT:AGT;G:S;)	amino acid mutations; remove mode	TACTTTTTGCAGATTCAGCTGG			ENSGALT00000001353	S	20
ENSGALT00000001660|28|+|2482010|2482055|24|(ABE;-;@17;NG;ATT:ATC;I:I;)	amino acid mutations; remove mode	TTTGATTTTGCAACCTGGAGAG			ENSGALT00000001660	I	24
ENSGALT00000001660|28|+|2482010|2482055|24|(ABE;-;@15;NG;ATT:ATC;I:I;)	amino acid mutations; remove mode	GCTTTGATTTTGCAACCTGGAG			ENSGALT00000001660	I	24
ENSGALT00000001790|24|+|1101665|1101710|38|(ABE;+;@17;NG;AAA:AAG;K:K;)	amino acid mutations; remove mode	GAAGATTCCCAAACAGGCTCGG			ENSGALT00000001790	K	38
ENSGALT00000001790|24|+|1101665|1101710|38|(ABE;+;@17;NGG;AAA:AAG;K:K;)	amino acid mutations; remove mode	GAAGATTCCCAAACAGGCTCGGG			ENSGALT00000001790	K	38
ENSGALT00000001798|11|-|761920|761965|15|(ABE;+;@16;NG;AAG:AGG;K:R;)	amino acid mutations; remove mode	AAGAGGTTTGTGTCTGAAGCAG			ENSGALT00000001798	R	15
ENSGALT00000001900|28|-|2636576|2636621|30|(ABE;+;@17;NG;AAG:GAG;K:E;)	amino acid mutations; remove mode	AAGGAGTTGAGAGCCAAGGACG			ENSGALT00000001900	E	30
ENSGALT00000001900|28|-|2636576|2636621|30|(ABE;+;@17;NGG;AAG:GAG;K:E;)	amino acid mutations; remove mode	AAGGAGTTGAGAGCCAAGGACGG			ENSGALT00000001900	E	30
ENSGALT00000002022|28|+|2701610|2701655|33|(ABE;-;@14;NG;TTA:TCA;L:S;)	amino acid mutations; remove mode	AGTGGTGACTTTATAAAACCAG			ENSGALT00000002022	S	33
ENSGALT00000002097|10|-|2443333|2443378|3|(Target-AID;+;@19;NG;CTA:TTA;L:L;)	amino acid mutations; remove mode	GCTGGAAGCTGTGGTCGAGCAG			ENSGALT00000002097	L	3
ENSGALT00000002097|10|-|2443333|2443378|3|(ABE;-;@16;NG;TTG:CTG;L:L;)	amino acid mutations; remove mode	TCCAGCTTCATCCCGCAGTTTG			ENSGALT00000002097	L	3
ENSGALT00000002121|10|+|2449180|2449225|12|(Target-AID;+;@17;NG;CTA:TTA;L:L;)	amino acid mutations; remove mode	AAGCTGGCGGACCAGCCTCTGG			ENSGALT00000002121	L	12
ENSGALT00000002121|10|+|2449180|2449225|12|(ABE;-;@14;NG;TTG:CTG;L:L;)	amino acid mutations; remove mode	CCGCCAGCTTCACCGCGATGTG			ENSGALT00000002121	L	12
ENSGALT00000002423|27|+|4430762|4430807|18|(ABE;-;@14;NGG;AAT:AAC;N:N;)	amino acid mutations; remove mode	CACGCAGTTCTTCCCCCTCATGG			ENSGALT00000002423	N	18
ENSGALT00000002423|27|+|4430762|4430807|18|(ABE;-;@15;NG;AAT:AAC;N:N;)	amino acid mutations; remove mode	ACGCAGTTCTTCCCCCTCATGG			ENSGALT00000002423	N	18
ENSGALT00000002423|27|+|4430762|4430807|18|(ABE;-;@14;NG;AAT:AAC;N:N;)	amino acid mutations; remove mode	CACGCAGTTCTTCCCCCTCATG			ENSGALT00000002423	N	18
ENSGALT00000002520|22|-|1628882|1628927|100|(Target-AID;+;@18;NG;CCG:CTG;P:L;)	amino acid mutations; remove mode	GCTGGAGGCTGCCAAGGCCGAG			ENSGALT00000002520	L	100
ENSGALT00000002520|22|-|1628882|1628927|100|(Target-AID;+;@18;NGG;CCG:CTG;P:L;)	amino acid mutations; remove mode	GCTGGAGGCTGCCAAGGCCGAGG			ENSGALT00000002520	L	100
ENSGALT00000002673|10|-|2141179|2141224|35|(Target-AID;+;@19;NG;CCG:TCG;P:S;)	amino acid mutations; remove mode	GTCGCCCATGTCAGAAACTAAG			ENSGALT00000002673	S	35
ENSGALT00000002716|21|+|2437264|2437309|13|(ABE;+;@16;NG;CAA:CGA;Q:R;)	amino acid mutations; remove mode	AAGCGAGGGGCAAACCAGCATG			ENSGALT00000002716	R	13
ENSGALT00000002990|21|-|2578425|2578470|3|(Target-AID;-;@18;NG;AGG:AAG;R:K;)	amino acid mutations; remove mode	TCTTTTTCATCACTCGCTCTTG			ENSGALT00000002990	K	3
ENSGALT00000003019|8|+|1214684|1214729|36|(Target-AID;-;@17;NG;AGG:AAG;R:K;)	amino acid mutations; remove mode	TTCTTCTTTATCATCATGAAGG			ENSGALT00000003019	K	36
ENSGALT00000003062|18|+|4419270|4419315|30|(Target-AID;-;@19;NG;CGC:CAC;R:H;)	amino acid mutations; remove mode	GTGCTTGCGGGGCCACGCCCCG			ENSGALT00000003062	H	30
ENSGALT00000003070|26|-|3869567|3869612|6|(ABE;+;@17;NG;AGA:GGA;R:G;)	amino acid mutations; remove mode	AAAGGAGGCGGCGGCGGCGGGG			ENSGALT00000003070	G	6
ENSGALT00000003142|14|+|13496336|13496381|33|(ABE;-;@13;NG;TCT:CCT;S:P;)	amino acid mutations; remove mode	AGGTCAGGCTTCTGGCGCGGGG			ENSGALT00000003142	P	33
ENSGALT00000003257|6|-|2776247|2776292|11|(ABE;+;@15;NG;AGC:GGC;S:G;)	amino acid mutations; remove mode	CCAAGGGCAGCGGCCTCGGCGG			ENSGALT00000003257	G	11
ENSGALT00000003258|8|+|1322573|1322618|39|(ABE;+;@17;NG;ACA:GCA;T:A;)	amino acid mutations; remove mode	AAAGCAGGAGATTGCCGAGCTG			ENSGALT00000003258	A	39
ENSGALT00000003258|8|+|1322573|1322618|39|(ABE;+;@17;NGG;ACA:GCA;T:A;)	amino acid mutations; remove mode	AAAGCAGGAGATTGCCGAGCTGG			ENSGALT00000003258	A	39
ENSGALT00000003264|10|+|1324208|1324253|28|(ABE;+;@16;NG;ACA:GCA;T:A;)	amino acid mutations; remove mode	CAAGGCACTGAGCCCCGTACTG			ENSGALT00000003264	A	28
ENSGALT00000003301|13|+|3848773|3848818|26|(ABE;+;@14;NG;ACA:ACG;T:T;)	amino acid mutations; remove mode	TAAGACGGTAAGTTTAACTGTG			ENSGALT00000003301	T	26
ENSGALT00000003317|23|+|4040841|4040886|35|(ABE;+;@15;NG;ACC:GCC;T:A;)	amino acid mutations; remove mode	AGAAGGCCCGCAAAGGTGAGCG			ENSGALT00000003317	A	35
ENSGALT00000003317|23|+|4040841|4040886|35|(ABE;+;@15;NGG;ACC:GCC;T:A;)	amino acid mutations; remove mode	AGAAGGCCCGCAAAGGTGAGCGG			ENSGALT00000003317	A	35
ENSGALT00000003330|12|-|1473792|1473837|21|(Target-AID;+;@18;NG;ACC:ATC;T:I;)	amino acid mutations; remove mode	AATCACCTACCAGGTGCGGGGG			ENSGALT00000003330	I	21
ENSGALT00000003330|12|-|1473792|1473837|21|(Target-AID;+;@19;NG;ACC:ATC;T:I;)	amino acid mutations; remove mode	ATCACCTACCAGGTGCGGGGGG			ENSGALT00000003330	I	21
ENSGALT00000003330|12|-|1473792|1473837|21|(Target-AID;+;@18;NGG;ACC:ATC;T:I;)	amino acid mutations; remove mode	AATCACCTACCAGGTGCGGGGGG			ENSGALT00000003330	I	21
ENSGALT00000003379|15|-|1469762|1469807|66|(ABE;+;@17;NG;ACG:GCG;T:A;)	amino acid mutations; remove mode	AAAGCGGACGCCTGCCAGAATG			ENSGALT00000003379	A	66
ENSGALT00000003379|15|-|1469762|1469807|66|(ABE;+;@17;NGG;ACG:GCG;T:A;)	amino acid mutations; remove mode	AAAGCGGACGCCTGCCAGAATGG			ENSGALT00000003379	A	66
ENSGALT00000003418|8|-|1678637|1678682|5|(ABE;+;@14;NG;GTA:GTG;V:V;)	amino acid mutations; remove mode	CAAAGTGGAGACGGAGGCCCTG			ENSGALT00000003418	V	5
ENSGALT00000003418|8|-|1678637|1678682|5|(ABE;+;@15;NG;GTA:GTG;V:V;)	amino acid mutations; remove mode	AAAGTGGAGACGGAGGCCCTGG			ENSGALT00000003418	V	5
ENSGALT00000003418|8|-|1678637|1678682|5|(ABE;+;@16;NG;GTA:GTG;V:V;)	amino acid mutations; remove mode	AAGTGGAGACGGAGGCCCTGGG			ENSGALT00000003418	V	5
ENSGALT00000003418|8|-|1678637|1678682|5|(ABE;+;@14;NGG;GTA:GTG;V:V;)	amino acid mutations; remove mode	CAAAGTGGAGACGGAGGCCCTGG			ENSGALT00000003418	V	5
ENSGALT00000003418|8|-|1678637|1678682|5|(ABE;+;@15;NGG;GTA:GTG;V:V;)	amino acid mutations; remove mode	AAAGTGGAGACGGAGGCCCTGGG			ENSGALT00000003418	V	5
ENSGALT00000003543|12|-|1871917|1871962|26|(Target-AID;-;@19;NGG;GTC:ATC;V:I;)	amino acid mutations; remove mode	ATCTTCTCCTCTGCCAGCAAGGG			ENSGALT00000003543	I	26
ENSGALT00000003543|12|-|1871917|1871962|26|(Target-AID;-;@18;NGG;GTC:ATC;V:I;)	amino acid mutations; remove mode	GATCTTCTCCTCTGCCAGCAAGG			ENSGALT00000003543	I	26
ENSGALT00000003543|12|-|1871917|1871962|26|(Target-AID;-;@19;NG;GTC:ATC;V:I;)	amino acid mutations; remove mode	ATCTTCTCCTCTGCCAGCAAGG			ENSGALT00000003543	I	26
ENSGALT00000003543|12|-|1871917|1871962|26|(Target-AID;-;@18;NG;GTC:ATC;V:I;)	amino acid mutations; remove mode	GATCTTCTCCTCTGCCAGCAAG			ENSGALT00000003543	I	26
ENSGALT00000003545|13|+|2788601|2788646|17|(Target-AID;-;@18;NG;GTC:ATC;V:I;)	amino acid mutations; remove mode	GATCTTCCAGATCTCCACGTTG			ENSGALT00000003545	I	17
ENSGALT00000003848|Z|-|9146294|9146339|28|(ABE;+;@13;NG;TAC:TGC;Y:C;)	amino acid mutations; remove mode	TCACAGTGCTCGCTGACTGGGG			ENSGALT00000003848	C	28
11:2026992-2026992-|Target-AID|-|G:A|GGA:GAA|nucleotide|(Target-AID;-;@17;NG;GGA:GAA;G:E;)	nucleotide mutations; create mode	TGTCCCCACACCTCCATTGGTG	11:2026992-2026992-	T
26:649677-649677+|Target-AID|-|G:A|GGC:GAC|nucleotide|(Target-AID;-;@17;NGG;GGC:GAC;G:D;)	nucleotide mutations; create mode	CAGCCTCGTTTTTCCCCACCCGG	26:649677-649677+	T
26:649677-649677+|Target-AID|-|G:A|GGC:GAC|nucleotide|(Target-AID;-;@17;NG;GGC:GAC;G:D;)	nucleotide mutations; create mode	CAGCCTCGTTTTTCCCCACCCG	26:649677-649677+	T
4:90447147-90447147-|Target-AID|-|G:A|GGT:GAT|nucleotide|(Target-AID;-;@17;NGG;GGT:GAT;G:D;)	nucleotide mutations; create mode	AGACCCACGTGGTGCCCTGTTGG	4:90447147-90447147-	T
4:90447147-90447147-|Target-AID|-|G:A|GGT:GAT|nucleotide|(Target-AID;-;@17;NG;GGT:GAT;G:D;)	nucleotide mutations; create mode	AGACCCACGTGGTGCCCTGTTG	4:90447147-90447147-	T
11:19157020-19157020-|Target-AID|-|G:A|GGT:GAT|nucleotide|(Target-AID;-;@17;NGG;GGT:GAT;G:D;)	nucleotide mutations; create mode	TTACCCACGGCCGTCTCCCCTGG	11:19157020-19157020-	T
11:19157020-19157020-|Target-AID|-|G:A|GGT:GAT|nucleotide|(Target-AID;-;@17;NG;GGT:GAT;G:D;)	nucleotide mutations; create mode	TTACCCACGGCCGTCTCCCCTG	11:19157020-19157020-	T
1:192954404-192954404+|Target-AID|-|G:A|AGA:AAA|nucleotide|(Target-AID;-;@17;NG;AGA:AAA;R:K;)	nucleotide mutations; create mode	GTTCTGCTCTATGGTCAGGAGG	1:192954404-192954404+	T
22:1190101-1190101-|Target-AID|-|G:A|AGA:AAA|nucleotide|(Target-AID;-;@17;NG;AGA:AAA;R:K;)	nucleotide mutations; create mode	CATCTCTGTGTCATGTCCTCAG	22:1190101-1190101-	T
26:1667773-1667773+|Target-AID|-|G:A|CGC:CAC|nucleotide|(Target-AID;-;@18;NG;CGC:CAC;R:H;)	nucleotide mutations; create mode	AGCGCCGCTGCCCTCGGTGGCG	26:1667773-1667773+	T
Z:47686872-47686872+|Target-AID|-|G:A|CGC:CAC|nucleotide|(Target-AID;-;@17;NG;CGC:CAC;R:H;)	nucleotide mutations; create mode	GGGCGAGCTGGCGCCGTGCACG	Z:47686872-47686872+	T
28:662224-662224+|Target-AID|-|G:A|CGC:CAC|nucleotide|(Target-AID;-;@19;NG;CGC:CAC;R:H;)	nucleotide mutations; create mode	GCGGCGCTGCGTCTGCTGATAG	28:662224-662224+	T
21:521241-521241+|Target-AID|-|G:A|CGC:CAC|nucleotide|(Target-AID;-;@17;NGG;CGC:CAC;R:H;)	nucleotide mutations; create mode	CTGCGCGCGGGGCCGCGTGCCGG	21:521241-521241+	T
21:521241-521241+|Target-AID|-|G:A|CGC:CAC|nucleotide|(Target-AID;-;@18;NG;CGC:CAC;R:H;)	nucleotide mutations; create mode	TGCGCGCGGGGCCGCGTGCCGG	21:521241-521241+	T
21:521241-521241+|Target-AID|-|G:A|CGC:CAC|nucleotide|(Target-AID;-;@17;NG;CGC:CAC;R:H;)	nucleotide mutations; create mode	CTGCGCGCGGGGCCGCGTGCCG	21:521241-521241+	T
21:603920-603920+|Target-AID|-|G:A|CGC:CAC|nucleotide|(Target-AID;-;@17;NGG;CGC:CAC;R:H;)	nucleotide mutations; create mode	GTGCGGCGGCCCGGGGAGGGCGG	21:603920-603920+	T
21:603920-603920+|Target-AID|-|G:A|CGC:CAC|nucleotide|(Target-AID;-;@18;NG;CGC:CAC;R:H;)	nucleotide mutations; create mode	TGCGGCGGCCCGGGGAGGGCGG	21:603920-603920+	T
21:603920-603920+|Target-AID|-|G:A|CGC:CAC|nucleotide|(Target-AID;-;@17;NG;CGC:CAC;R:H;)	nucleotide mutations; create mode	GTGCGGCGGCCCGGGGAGGGCG	21:603920-603920+	T
23:5140363-5140363-|Target-AID|-|G:A|AGT:AAT|nucleotide|(Target-AID;-;@19;NGG;AGT:AAT;S:N;)	nucleotide mutations; create mode	ACTTCCCAGGCACCAATCCTGGG	23:5140363-5140363-	T
23:5140363-5140363-|Target-AID|-|G:A|AGT:AAT|nucleotide|(Target-AID;-;@18;NGG;AGT:AAT;S:N;)	nucleotide mutations; create mode	AACTTCCCAGGCACCAATCCTGG	23:5140363-5140363-	T
23:5140363-5140363-|Target-AID|-|G:A|AGT:AAT|nucleotide|(Target-AID;-;@19;NG;AGT:AAT;S:N;)	nucleotide mutations; create mode	ACTTCCCAGGCACCAATCCTGG	23:5140363-5140363-	T
23:5140363-5140363-|Target-AID|-|G:A|AGT:AAT|nucleotide|(Target-AID;-;@18;NG;AGT:AAT;S:N;)	nucleotide mutations; create mode	AACTTCCCAGGCACCAATCCTG	23:5140363-5140363-	T
14:12890378-12890378-|Target-AID|-|G:A|TGC:TAC|nucleotide|(Target-AID;-;@18;NG;TGC:TAC;C:Y;)	nucleotide mutations; create mode	TGCAGGCACTGGGCACAGGCAG	14:12890378-12890378-	T
4:60552450-60552450+|Target-AID|-|G:A|TGG:TAG|nucleotide|(Target-AID;-;@19;NG;TGG:TAG;W:*;)	nucleotide mutations; create mode	CCAGCTGCTTAGCTGAGATAAG	4:60552450-60552450+	T
27:3023997-3023997+|Target-AID|-|G:A|CGT:CAT|nucleotide|(Target-AID;-;@17;NG;CGT:CAT;R:H;)	nucleotide mutations; create mode	TGACGGAAAACAGCTGGGAAAG	27:3023997-3023997+	T
11:19283723-19283723+|Target-AID|-|G:A|CGC:CAC|nucleotide|(Target-AID;-;@18;NGG;CGC:CAC;R:H;)	nucleotide mutations; create mode	GGCGCTACGGGGTGCGGGGAGGG	11:19283723-19283723+	T
11:19283723-19283723+|Target-AID|-|G:A|CGC:CAC|nucleotide|(Target-AID;-;@17;NGG;CGC:CAC;R:H;)	nucleotide mutations; create mode	CGGCGCTACGGGGTGCGGGGAGG	11:19283723-19283723+	T
11:19283723-19283723+|Target-AID|-|G:A|CGC:CAC|nucleotide|(Target-AID;-;@18;NG;CGC:CAC;R:H;)	nucleotide mutations; create mode	GGCGCTACGGGGTGCGGGGAGG	11:19283723-19283723+	T
11:19283723-19283723+|Target-AID|-|G:A|CGC:CAC|nucleotide|(Target-AID;-;@17;NG;CGC:CAC;R:H;)	nucleotide mutations; create mode	CGGCGCTACGGGGTGCGGGGAG	11:19283723-19283723+	T
11:19692763-19692763+|Target-AID|-|G:A|GGT:GAT|nucleotide|(Target-AID;-;@17;NGG;GGT:GAT;G:D;)	nucleotide mutations; create mode	TTACCCAGGCACGACGGGAAGGG	11:19692763-19692763+	T
11:19692763-19692763+|Target-AID|-|G:A|GGT:GAT|nucleotide|(Target-AID;-;@17;NG;GGT:GAT;G:D;)	nucleotide mutations; create mode	TTACCCAGGCACGACGGGAAGG	11:19692763-19692763+	T
26:2308920-2308920-|Target-AID|-|G:A|AGT:AAT|nucleotide|(Target-AID;-;@18;NG;AGT:AAT;S:N;)	nucleotide mutations; create mode	AACTTTCTGACTTGCTCTGCTG	26:2308920-2308920-	T
11:19965064-19965064-|Target-AID|-|G:A|AGT:AAT|nucleotide|(Target-AID;-;@19;NGG;AGT:AAT;S:N;)	nucleotide mutations; create mode	ACTACCCCCGCTTTCCCCGCGGG	11:19965064-19965064-	T
11:19965064-19965064-|Target-AID|-|G:A|AGT:AAT|nucleotide|(Target-AID;-;@18;NGG;AGT:AAT;S:N;)	nucleotide mutations; create mode	CACTACCCCCGCTTTCCCCGCGG	11:19965064-19965064-	T
11:19965064-19965064-|Target-AID|-|G:A|AGT:AAT|nucleotide|(Target-AID;-;@19;NG;AGT:AAT;S:N;)	nucleotide mutations; create mode	ACTACCCCCGCTTTCCCCGCGG	11:19965064-19965064-	T
11:19965064-19965064-|Target-AID|-|G:A|AGT:AAT|nucleotide|(Target-AID;-;@18;NG;AGT:AAT;S:N;)	nucleotide mutations; create mode	CACTACCCCCGCTTTCCCCGCG	11:19965064-19965064-	T
25:2576713-2576713+|Target-AID|-|G:A|AGC:AAC|nucleotide|(Target-AID;-;@18;NG;AGC:AAC;S:N;)	nucleotide mutations; create mode	CGCTGCAGCACAAAGCACGGAG	25:2576713-2576713+	T
28:1980244-1980244+|Target-AID|-|G:A|AGC:AAC|nucleotide|(Target-AID;-;@17;NG;AGC:AAC;S:N;)	nucleotide mutations; create mode	CAGCTGAAAAACTCTTTTGGAG	28:1980244-1980244+	T
23:1558186-1558186-|Target-AID|-|G:A|TGC:TAC|nucleotide|(Target-AID;-;@17;NGG;TGC:TAC;C:Y;)	nucleotide mutations; create mode	GAGCAGTACTAACAGCTCAGTGG	23:1558186-1558186-	T
23:1558186-1558186-|Target-AID|-|G:A|TGC:TAC|nucleotide|(Target-AID;-;@18;NG;TGC:TAC;C:Y;)	nucleotide mutations; create mode	AGCAGTACTAACAGCTCAGTGG	23:1558186-1558186-	T
23:1558186-1558186-|Target-AID|-|G:A|TGC:TAC|nucleotide|(Target-AID;-;@17;NG;TGC:TAC;C:Y;)	nucleotide mutations; create mode	GAGCAGTACTAACAGCTCAGTG	23:1558186-1558186-	T
1:193583982-193583982+|Target-AID|-|G:A|TGA:TAA|nucleotide|(Target-AID;-;@19;NG;TGA:TAA;*:*;)	nucleotide mutations; create mode	TCATGGATTTCTTCAGTGCATG	1:193583982-193583982+	T
23:1578911-1578911+|Target-AID|-|G:A|TGA:TAA|nucleotide|(Target-AID;-;@19;NGG;TGA:TAA;*:*;)	nucleotide mutations; create mode	TCAGCCCCACCTATAGGAAACGG	23:1578911-1578911+	T
23:1578911-1578911+|Target-AID|-|G:A|TGA:TAA|nucleotide|(Target-AID;-;@19;NG;TGA:TAA;*:*;)	nucleotide mutations; create mode	TCAGCCCCACCTATAGGAAACG	23:1578911-1578911+	T
17:10869041-10869041-|Target-AID|+|C:T|GCT:GTT|nucleotide|(Target-AID;+;@19;NG;GCT:GTT;A:V;)	nucleotide mutations; create mode	GCTATATGAAACAGAAAACTTG	17:10869041-10869041-	T
13:1515572-1515572-|Target-AID|+|C:T|GCT:GTT|nucleotide|(Target-AID;+;@18;NG;GCT:GTT;A:V;)	nucleotide mutations; create mode	AGCTTGGGGCTGCCTGCTGCAG	13:1515572-1515572-	T
21:1372124-1372124+|Target-AID|+|C:T|GCT:GTT|nucleotide|(Target-AID;+;@17;NG;GCT:GTT;A:V;)	nucleotide mutations; create mode	AGGCTCCTGGAGCTATGACACG	21:1372124-1372124+	T
21:1372124-1372124+|Target-AID|+|C:T|GCT:GTT|nucleotide|(Target-AID;+;@18;NG;GCT:GTT;A:V;)	nucleotide mutations; create mode	GGCTCCTGGAGCTATGACACGG	21:1372124-1372124+	T
21:1372124-1372124+|Target-AID|+|C:T|GCT:GTT|nucleotide|(Target-AID;+;@17;NGG;GCT:GTT;A:V;)	nucleotide mutations; create mode	AGGCTCCTGGAGCTATGACACGG	21:1372124-1372124+	T
17:10448255-10448255+|Target-AID|+|C:T|GCG:GTG|nucleotide|(Target-AID;+;@17;NG;GCG:GTG;A:V;)	nucleotide mutations; create mode	GTGCGGAGGAGCCGCTCCCAGG	17:10448255-10448255+	T
17:10448255-10448255+|Target-AID|+|C:T|GCG:GTG|nucleotide|(Target-AID;+;@18;NG;GCG:GTG;A:V;)	nucleotide mutations; create mode	TGCGGAGGAGCCGCTCCCAGGG	17:10448255-10448255+	T
17:10448255-10448255+|Target-AID|+|C:T|GCG:GTG|nucleotide|(Target-AID;+;@19;NG;GCG:GTG;A:V;)	nucleotide mutations; create mode	GCGGAGGAGCCGCTCCCAGGGG	17:10448255-10448255+	T
17:10448255-10448255+|Target-AID|+|C:T|GCG:GTG|nucleotide|(Target-AID;+;@17;NGG;GCG:GTG;A:V;)	nucleotide mutations; create mode	GTGCGGAGGAGCCGCTCCCAGGG	17:10448255-10448255+	T
17:10448255-10448255+|Target-AID|+|C:T|GCG:GTG|nucleotide|(Target-AID;+;@18;NGG;GCG:GTG;A:V;)	nucleotide mutations; create mode	TGCGGAGGAGCCGCTCCCAGGGG	17:10448255-10448255+	T
24:312324-312324-|Target-AID|+|C:T|GCG:GTG|nucleotide|(Target-AID;+;@19;NG;GCG:GTG;A:V;)	nucleotide mutations; create mode	GCGGCCTCCCCAAGGGCTGTTG	24:312324-312324-	T
24:312324-312324-|Target-AID|+|C:T|GCG:GTG|nucleotide|(Target-AID;+;@19;NGG;GCG:GTG;A:V;)	nucleotide mutations; create mode	GCGGCCTCCCCAAGGGCTGTTGG	24:312324-312324-	T
28:2386230-2386230+|Target-AID|+|C:T|GCG:GTG|nucleotide|(Target-AID;+;@18;NG;GCG:GTG;A:V;)	nucleotide mutations; create mode	AGCGCGCCGCTTCGCTGCGCCG	28:2386230-2386230+	T
26:2534765-2534765+|Target-AID|+|C:T|TCT:TTT|nucleotide|(Target-AID;+;@17;NG;TCT:TTT;S:F;)	nucleotide mutations; create mode	CTTCTCCCCTCCCCGTGCCCCG	26:2534765-2534765+	T
23:1840976-1840976+|Target-AID|+|C:T|CCA:CTA|nucleotide|(Target-AID;+;@19;NG;CCA:CTA;P:L;)	nucleotide mutations; create mode	CCAATCCGCGAAGGCAGCAGCG	23:1840976-1840976+	T
15:742848-742848+|Target-AID|+|C:T|GCC:GTC|nucleotide|(Target-AID;+;@17;NG;GCC:GTC;A:V;)	nucleotide mutations; create mode	CTGCCCCCGGGCCGGGCTGCGG	15:742848-742848+	T
15:742848-742848+|Target-AID|+|C:T|GCC:GTC|nucleotide|(Target-AID;+;@17;NGG;GCC:GTC;A:V;)	nucleotide mutations; create mode	CTGCCCCCGGGCCGGGCTGCGGG	15:742848-742848+	T
17:10213523-10213523+|Target-AID|+|C:T|CCG:CTG|nucleotide|(Target-AID;+;@19;NG;CCG:CTG;P:L;)	nucleotide mutations; create mode	CCGGGGAGAGGCAGCGGCAGAG	17:10213523-10213523+	T
11:488589-488589+|Target-AID|+|C:T|TCA:TTA|nucleotide|(Target-AID;+;@18;NG;TCA:TTA;S:L;)	nucleotide mutations; create mode	CTCAGCAGCGCGCAGAACAAGG	11:488589-488589+	T
24:1075777-1075777+|Target-AID|+|C:T|TCA:TTA|nucleotide|(Target-AID;+;@18;NG;TCA:TTA;S:L;)	nucleotide mutations; create mode	ATCAGTACAGTACACTGGAAAG	24:1075777-1075777+	T
24:1075777-1075777+|Target-AID|+|C:T|TCA:TTA|nucleotide|(Target-AID;+;@19;NG;TCA:TTA;S:L;)	nucleotide mutations; create mode	TCAGTACAGTACACTGGAAAGG	24:1075777-1075777+	T
24:1075777-1075777+|Target-AID|+|C:T|TCA:TTA|nucleotide|(Target-AID;+;@18;NGG;TCA:TTA;S:L;)	nucleotide mutations; create mode	ATCAGTACAGTACACTGGAAAGG	24:1075777-1075777+	T
23:2266974-2266974-|Target-AID|+|C:T|GCA:GTA|nucleotide|(Target-AID;+;@18;NG;GCA:GTA;A:V;)	nucleotide mutations; create mode	GGCAGGCTGTGGGTTCACAGTG	23:2266974-2266974-	T
21:1012986-1012986-|Target-AID|+|C:T|ACT:ATT|nucleotide|(Target-AID;+;@19;NG;ACT:ATT;T:I;)	nucleotide mutations; create mode	ACTGGTTGTGGGAGCAGTGTTG	21:1012986-1012986-	T
21:1416832-1416832+|Target-AID|+|C:T|ACA:ATA|nucleotide|(Target-AID;+;@18;NG;ACA:ATA;T:I;)	nucleotide mutations; create mode	CACATGGATTGGCTATCGACTG	21:1416832-1416832+	T
23:4108492-4108492-|Target-AID|+|C:T|CCT:CTT|nucleotide|(Target-AID;+;@19;NG;CCT:CTT;P:L;)	nucleotide mutations; create mode	CCTTGCAATAAAGTGCCCTCTG	23:4108492-4108492-	T
18:2213078-2213078+|Target-AID|+|C:T|GCT:GTT|nucleotide|(Target-AID;+;@18;NG;GCT:GTT;A:V;)	nucleotide mutations; create mode	TGCTATTTACACCAAACACGTG	18:2213078-2213078+	T
1:194229599-194229599-|Target-AID|+|C:T|ACG:ATG|nucleotide|(Target-AID;+;@18;NG;ACG:ATG;T:M;)	nucleotide mutations; create mode	CACGCGGGGCGGAGGGAATGGG	1:194229599-194229599-	T
24:1676178-1676178+|Target-AID|+|C:T|ACG:ATG|nucleotide|(Target-AID;+;@19;NG;ACG:ATG;T:M;)	nucleotide mutations; create mode	ACGGAGGAAGCAGCAGCAGCAG	24:1676178-1676178+	T
17:9111487-9111487-|Target-AID|+|C:T|ACT:ATT|nucleotide|(Target-AID;+;@17;NG;ACT:ATT;T:I;)	nucleotide mutations; create mode	ATACTGATCCTTCTTCACAATG	17:9111487-9111487-	T
17:9111487-9111487-|Target-AID|+|C:T|ACT:ATT|nucleotide|(Target-AID;+;@18;NG;ACT:ATT;T:I;)	nucleotide mutations; create mode	TACTGATCCTTCTTCACAATGG	17:9111487-9111487-	T
17:9111487-9111487-|Target-AID|+|C:T|ACT:ATT|nucleotide|(Target-AID;+;@17;NGG;ACT:ATT;T:I;)	nucleotide mutations; create mode	ATACTGATCCTTCTTCACAATGG	17:9111487-9111487-	T
13:8450153-8450153+|Target-AID|+|C:T|TCT:TTT|nucleotide|(Target-AID;+;@19;NG;TCT:TTT;S:F;)	nucleotide mutations; create mode	TCTACGTTCTTCTCCCCTCTCG	13:8450153-8450153+	T
22:1615779-1615779+|ABE|+|A:G|AAG:AGG|nucleotide|(ABE;+;@17;NG;AAG:AGG;K:R;)	nucleotide mutations; create mode	ATAAGTCGTGAACCTGAGGGAG	22:1615779-1615779+	G
22:1615779-1615779+|ABE|+|A:G|AAG:AGG|nucleotide|(ABE;+;@17;NGG;AAG:AGG;K:R;)	nucleotide mutations; create mode	ATAAGTCGTGAACCTGAGGGAGG	22:1615779-1615779+	G
23:3551952-3551952+|ABE|+|A:G|CAG:CGG|nucleotide|(ABE;+;@17;NG;CAG:CGG;Q:R;)	nucleotide mutations; create mode	CACAGTCTCGTTGGGCCCAGCG	23:3551952-3551952+	G
18:4117190-4117190-|ABE|+|A:G|CAG:CGG|nucleotide|(ABE;+;@14;NG;CAG:CGG;Q:R;)	nucleotide mutations; create mode	CGTTGCAGTGCGTGGCGGTGAG	18:4117190-4117190-	G
10:2334946-2334946+|ABE|+|A:G|CAG:CGG|nucleotide|(ABE;+;@16;NG;CAG:CGG;Q:R;)	nucleotide mutations; create mode	CTGCAGGGCCGGTCACGGCACG	10:2334946-2334946+	G
24:2545822-2545822+|ABE|+|A:G|GAG:GGG|nucleotide|(ABE;+;@13;NG;GAG:GGG;E:G;)	nucleotide mutations; create mode	GGCGCTGAGCGCCCGCCGCCCG	24:2545822-2545822+	G
24:2568308-2568308+|ABE|+|A:G|GAG:GGG|nucleotide|(ABE;+;@14;NG;GAG:GGG;E:G;)	nucleotide mutations; create mode	ACCCTGAGGACGAGCCAATCAG	24:2568308-2568308+	G
20:907636-907636-|ABE|+|A:G|GAT:GGT|nucleotide|(ABE;+;@15;NG;GAT:GGT;D:G;)	nucleotide mutations; create mode	ATGTGATGCTGATTGACTTCAG	20:907636-907636-	G
20:907636-907636-|ABE|+|A:G|GAT:GGT|nucleotide|(ABE;+;@16;NG;GAT:GGT;D:G;)	nucleotide mutations; create mode	TGTGATGCTGATTGACTTCAGG	20:907636-907636-	G
20:907636-907636-|ABE|+|A:G|GAT:GGT|nucleotide|(ABE;+;@17;NG;GAT:GGT;D:G;)	nucleotide mutations; create mode	GTGATGCTGATTGACTTCAGGG	20:907636-907636-	G
20:907636-907636-|ABE|+|A:G|GAT:GGT|nucleotide|(ABE;+;@15;NGG;GAT:GGT;D:G;)	nucleotide mutations; create mode	ATGTGATGCTGATTGACTTCAGG	20:907636-907636-	G
20:907636-907636-|ABE|+|A:G|GAT:GGT|nucleotide|(ABE;+;@16;NGG;GAT:GGT;D:G;)	nucleotide mutations; create mode	TGTGATGCTGATTGACTTCAGGG	20:907636-907636-	G
18:3404510-3404510+|ABE|+|A:G|GAT:GGT|nucleotide|(ABE;+;@15;NG;GAT:GGT;D:G;)	nucleotide mutations; create mode	CTATGATTGCCGCGCACCAATG	18:3404510-3404510+	G
27:3709968-3709968+|ABE|+|A:G|CAC:CGC|nucleotide|(ABE;+;@13;NG;CAC:CGC;H:R;)	nucleotide mutations; create mode	CGACCCCACCCCGCACCCTGGG	27:3709968-3709968+	G
27:3709968-3709968+|ABE|+|A:G|CAC:CGC|nucleotide|(ABE;+;@15;NG;CAC:CGC;H:R;)	nucleotide mutations; create mode	ACCCCACCCCGCACCCTGGGCG	27:3709968-3709968+	G
27:3709968-3709968+|ABE|+|A:G|CAC:CGC|nucleotide|(ABE;+;@16;NG;CAC:CGC;H:R;)	nucleotide mutations; create mode	CCCCACCCCGCACCCTGGGCGG	27:3709968-3709968+	G
27:3709968-3709968+|ABE|+|A:G|CAC:CGC|nucleotide|(ABE;+;@15;NGG;CAC:CGC;H:R;)	nucleotide mutations; create mode	ACCCCACCCCGCACCCTGGGCGG	27:3709968-3709968+	G
28:1663496-1663496-|ABE|+|A:G|CAC:CGC|nucleotide|(ABE;+;@17;NG;CAC:CGC;H:R;)	nucleotide mutations; create mode	TTCACCCGAAGCACTGCCTTAG	28:1663496-1663496-	G
26:3550397-3550397-|ABE|+|A:G|GAC:GGC|nucleotide|(ABE;+;@16;NG;GAC:GGC;D:G;)	nucleotide mutations; create mode	TGGGACCCATCCCAGCGCACAG	26:3550397-3550397-	G
18:4520488-4520488+|ABE|+|A:G|CAT:CGT|nucleotide|(ABE;+;@14;NG;CAT:CGT;H:R;)	nucleotide mutations; create mode	CAGCCCATGTAAAATGTATGAG	18:4520488-4520488+	G
Z:8540892-8540892-|ABE|+|A:G|CAG:CGG|nucleotide|(ABE;+;@14;NG;CAG:CGG;Q:R;)	nucleotide mutations; create mode	CTTTTCAGCTGCCTCTCCTGTG	Z:8540892-8540892-	G
Z:8540892-8540892-|ABE|+|A:G|CAG:CGG|nucleotide|(ABE;+;@17;NG;CAG:CGG;Q:R;)	nucleotide mutations; create mode	TTCAGCTGCCTCTCCTGTGCAG	Z:8540892-8540892-	G
8:1252014-1252014+|ABE|+|A:G|AAT:AGT|nucleotide|(ABE;+;@17;NG;AAT:AGT;N:S;)	nucleotide mutations; create mode	ATAATTGTTGGTTTTTTCTTTG	8:1252014-1252014+	G
23:3762443-3762443-|ABE|+|A:G|TAC:TGC|nucleotide|(ABE;+;@14;NG;TAC:TGC;Y:C;)	nucleotide mutations; create mode	GAGGGTACCACCTGAGTATGTG	23:3762443-3762443-	G
28:2782240-2782240+|ABE|+|A:G|GAG:GGG|nucleotide|(ABE;+;@13;NG;GAG:GGG;E:G;)	nucleotide mutations; create mode	GGCCGTGAGTGTGTGATCTGTG	28:2782240-2782240+	G
28:2782240-2782240+|ABE|+|A:G|GAG:GGG|nucleotide|(ABE;+;@15;NG;GAG:GGG;E:G;)	nucleotide mutations; create mode	CCGTGAGTGTGTGATCTGTGCG	28:2782240-2782240+	G
18:4549221-4549221+|ABE|+|A:G|GAG:GGG|nucleotide|(ABE;+;@17;NG;GAG:GGG;E:G;)	nucleotide mutations; create mode	AGGAGTCTGCGCACCAGCGCAG	18:4549221-4549221+	G
19:4156182-4156182-|ABE|+|A:G|TAG:TGG|nucleotide|(ABE;+;@15;NG;TAG:TGG;*:W;)	nucleotide mutations; create mode	CAGCTAGGAGAGTGGGGGTGAG	19:4156182-4156182-	G
19:4156182-4156182-|ABE|+|A:G|TAG:TGG|nucleotide|(ABE;+;@15;NGG;TAG:TGG;*:W;)	nucleotide mutations; create mode	CAGCTAGGAGAGTGGGGGTGAGG	19:4156182-4156182-	G
18:4597252-4597252+|ABE|-|T:C|CTG:CCG|nucleotide|(ABE;-;@15;NGG;CTG:CCG;L:P;)	nucleotide mutations; create mode	AGCCCAGGAGCGGCTCCGGGAGG	18:4597252-4597252+	G
18:4597252-4597252+|ABE|-|T:C|CTG:CCG|nucleotide|(ABE;-;@15;NG;CTG:CCG;L:P;)	nucleotide mutations; create mode	AGCCCAGGAGCGGCTCCGGGAG	18:4597252-4597252+	G
18:4597252-4597252+|ABE|-|T:C|CTG:CCG|nucleotide|(ABE;-;@13;NG;CTG:CCG;L:P;)	nucleotide mutations; create mode	AGAGCCCAGGAGCGGCTCCGGG	18:4597252-4597252+	G
Z:70791517-70791517-|ABE|-|T:C|TTG:TCG|nucleotide|(ABE;-;@13;NG;TTG:TCG;L:S;)	nucleotide mutations; create mode	ACTTTGCAATTCTCTCATTTAG	Z:70791517-70791517-	G
23:4160625-4160625-|ABE|-|T:C|GTG:GCG|nucleotide|(ABE;-;@17;NGG;GTG:GCG;V:A;)	nucleotide mutations; create mode	CCCACCTTCTGTCCCTGCCGCGG	23:4160625-4160625-	G
23:4160625-4160625-|ABE|-|T:C|GTG:GCG|nucleotide|(ABE;-;@17;NG;GTG:GCG;V:A;)	nucleotide mutations; create mode	CCCACCTTCTGTCCCTGCCGCG	23:4160625-4160625-	G
23:4160625-4160625-|ABE|-|T:C|GTG:GCG|nucleotide|(ABE;-;@15;NG;GTG:GCG;V:A;)	nucleotide mutations; create mode	AACCCACCTTCTGTCCCTGCCG	23:4160625-4160625-	G
Z:72942523-72942523+|ABE|-|T:C|GTG:GCG|nucleotide|(ABE;-;@16;NGG;GTG:GCG;V:A;)	nucleotide mutations; create mode	CGGCACGGACACCGGCGGGCGGG	Z:72942523-72942523+	G
Z:72942523-72942523+|ABE|-|T:C|GTG:GCG|nucleotide|(ABE;-;@15;NGG;GTG:GCG;V:A;)	nucleotide mutations; create mode	GCGGCACGGACACCGGCGGGCGG	Z:72942523-72942523+	G
Z:72942523-72942523+|ABE|-|T:C|GTG:GCG|nucleotide|(ABE;-;@16;NG;GTG:GCG;V:A;)	nucleotide mutations; create mode	CGGCACGGACACCGGCGGGCGG	Z:72942523-72942523+	G
Z:72942523-72942523+|ABE|-|T:C|GTG:GCG|nucleotide|(ABE;-;@15;NG;GTG:GCG;V:A;)	nucleotide mutations; create mode	GCGGCACGGACACCGGCGGGCG	Z:72942523-72942523+	G
Z:72942523-72942523+|ABE|-|T:C|GTG:GCG|nucleotide|(ABE;-;@13;NG;GTG:GCG;V:A;)	nucleotide mutations; create mode	CGGCGGCACGGACACCGGCGGG	Z:72942523-72942523+	G
18:4707508-4707508+|ABE|-|T:C|CTC:CCC|nucleotide|(ABE;-;@14;NG;CTC:CCC;L:P;)	nucleotide mutations; create mode	CACTTGAGCAAAAACGGAAACG	18:4707508-4707508+	G
Z:73017141-73017141+|ABE|-|T:C|CTC:CCC|nucleotide|(ABE;-;@17;NGG;CTC:CCC;L:P;)	nucleotide mutations; create mode	CCGAGCGGCTGCCCGTGGGGGGG	Z:73017141-73017141+	G
Z:73017141-73017141+|ABE|-|T:C|CTC:CCC|nucleotide|(ABE;-;@16;NGG;CTC:CCC;L:P;)	nucleotide mutations; create mode	CCCGAGCGGCTGCCCGTGGGGGG	Z:73017141-73017141+	G
Z:73017141-73017141+|ABE|-|T:C|CTC:CCC|nucleotide|(ABE;-;@15;NGG;CTC:CCC;L:P;)	nucleotide mutations; create mode	TCCCGAGCGGCTGCCCGTGGGGG	Z:73017141-73017141+	G
Z:73017141-73017141+|ABE|-|T:C|CTC:CCC|nucleotide|(ABE;-;@14;NGG;CTC:CCC;L:P;)	nucleotide mutations; create mode	CTCCCGAGCGGCTGCCCGTGGGG	Z:73017141-73017141+	G
Z:73017141-73017141+|ABE|-|T:C|CTC:CCC|nucleotide|(ABE;-;@13;NGG;CTC:CCC;L:P;)	nucleotide mutations; create mode	CCTCCCGAGCGGCTGCCCGTGGG	Z:73017141-73017141+	G
Z:73017141-73017141+|ABE|-|T:C|CTC:CCC|nucleotide|(ABE;-;@17;NG;CTC:CCC;L:P;)	nucleotide mutations; create mode	CCGAGCGGCTGCCCGTGGGGGG	Z:73017141-73017141+	G
Z:73017141-73017141+|ABE|-|T:C|CTC:CCC|nucleotide|(ABE;-;@16;NG;CTC:CCC;L:P;)	nucleotide mutations; create mode	CCCGAGCGGCTGCCCGTGGGGG	Z:73017141-73017141+	G
Z:73017141-73017141+|ABE|-|T:C|CTC:CCC|nucleotide|(ABE;-;@15;NG;CTC:CCC;L:P;)	nucleotide mutations; create mode	TCCCGAGCGGCTGCCCGTGGGG	Z:73017141-73017141+	G
Z:73017141-73017141+|ABE|-|T:C|CTC:CCC|nucleotide|(ABE;-;@14;NG;CTC:CCC;L:P;)	nucleotide mutations; create mode	CTCCCGAGCGGCTGCCCGTGGG	Z:73017141-73017141+	G
Z:73017141-73017141+|ABE|-|T:C|CTC:CCC|nucleotide|(ABE;-;@13;NG;CTC:CCC;L:P;)	nucleotide mutations; create mode	CCTCCCGAGCGGCTGCCCGTGG	Z:73017141-73017141+	G
15:2356680-2356680+|ABE|-|T:C|CTG:CCG|nucleotide|(ABE;-;@13;NG;CTG:CCG;L:P;)	nucleotide mutations; create mode	GTCCTTCAGCACCACCGCGCTG	15:2356680-2356680+	G
17:8212489-8212489-|ABE|-|T:C|CTG:CCG|nucleotide|(ABE;-;@14;NG;CTG:CCG;L:P;)	nucleotide mutations; create mode	TGATTCAGATGCTTAAGGAGGG	17:8212489-8212489-	G
23:4424002-4424002+|ABE|-|T:C|CTG:CCG|nucleotide|(ABE;-;@15;NG;CTG:CCG;L:P;)	nucleotide mutations; create mode	CGCGCAGCCCCAATGCCCGCTG	23:4424002-4424002+	G
23:4113629-4113629+|ABE|-|T:C|ATC:ACC|nucleotide|(ABE;-;@16;NGG;ATC:ACC;I:T;)	nucleotide mutations; create mode	TCCGATGGGAGCGGGTGGGAGGG	23:4113629-4113629+	G
23:4113629-4113629+|ABE|-|T:C|ATC:ACC|nucleotide|(ABE;-;@15;NGG;ATC:ACC;I:T;)	nucleotide mutations; create mode	GTCCGATGGGAGCGGGTGGGAGG	23:4113629-4113629+	G
23:4113629-4113629+|ABE|-|T:C|ATC:ACC|nucleotide|(ABE;-;@17;NG;ATC:ACC;I:T;)	nucleotide mutations; create mode	CCGATGGGAGCGGGTGGGAGGG	23:4113629-4113629+	G
23:4113629-4113629+|ABE|-|T:C|ATC:ACC|nucleotide|(ABE;-;@16;NG;ATC:ACC;I:T;)	nucleotide mutations; create mode	TCCGATGGGAGCGGGTGGGAGG	23:4113629-4113629+	G
23:4113629-4113629+|ABE|-|T:C|ATC:ACC|nucleotide|(ABE;-;@15;NG;ATC:ACC;I:T;)	nucleotide mutations; create mode	GTCCGATGGGAGCGGGTGGGAG	23:4113629-4113629+	G
23:4113629-4113629+|ABE|-|T:C|ATC:ACC|nucleotide|(ABE;-;@13;NG;ATC:ACC;I:T;)	nucleotide mutations; create mode	GCGTCCGATGGGAGCGGGTGGG	23:4113629-4113629+	G
19:4871688-4871688+|ABE|-|T:C|ATG:ACG|nucleotide|(ABE;-;@15;NG;ATG:ACG;M:T;)	nucleotide mutations; create mode	GCGCCATTGGCTGGGCGGTCTG	19:4871688-4871688+	G
1:20173967-20173967+|ABE|+|A:G|TAT:TGT|nucleotide|(ABE;+;@15;NG;TAT:TGT;Y:C;)	nucleotide mutations; remove mode	GCTGTGTAATACACATTGTGGG	1:20173967-20173967+	G
27:2399295-2399295+|ABE|+|A:G|AAG:AGG|nucleotide|(ABE;+;@17;NG;AAG:AGG;K:R;)	nucleotide mutations; remove mode	AGAGGAGGAGGAGGAGGAGGAG	27:2399295-2399295+	G
27:2399295-2399295+|ABE|+|A:G|AAG:AGG|nucleotide|(ABE;+;@17;NGG;AAG:AGG;K:R;)	nucleotide mutations; remove mode	AGAGGAGGAGGAGGAGGAGGAGG	27:2399295-2399295+	G
11:2026992-2026992-|ABE|+|A:G|GAA:GGA|nucleotide|(ABE;+;@14;NG;GAA:GGA;E:G;)	nucleotide mutations; remove mode	TGTGGGGACACCTGGGTAGGAG	11:2026992-2026992-	G
26:375189-375189+|ABE|+|A:G|GAA:GGA|nucleotide|(ABE;+;@14;NG;GAA:GGA;E:G;)	nucleotide mutations; remove mode	TGCGGGGATGCGTGCTGCGCTG	26:375189-375189+	G
26:375189-375189+|ABE|+|A:G|GAA:GGA|nucleotide|(ABE;+;@15;NG;GAA:GGA;E:G;)	nucleotide mutations; remove mode	GCGGGGATGCGTGCTGCGCTGG	26:375189-375189+	G
26:375189-375189+|ABE|+|A:G|GAA:GGA|nucleotide|(ABE;+;@16;NG;GAA:GGA;E:G;)	nucleotide mutations; remove mode	CGGGGATGCGTGCTGCGCTGGG	26:375189-375189+	G
26:375189-375189+|ABE|+|A:G|GAA:GGA|nucleotide|(ABE;+;@14;NGG;GAA:GGA;E:G;)	nucleotide mutations; remove mode	TGCGGGGATGCGTGCTGCGCTGG	26:375189-375189+	G
26:375189-375189+|ABE|+|A:G|GAA:GGA|nucleotide|(ABE;+;@15;NGG;GAA:GGA;E:G;)	nucleotide mutations; remove mode	GCGGGGATGCGTGCTGCGCTGGG	26:375189-375189+	G
11:19180105-19180105-|ABE|+|A:G|GAA:GGA|nucleotide|(ABE;+;@15;NG;GAA:GGA;E:G;)	nucleotide mutations; remove mode	GCTGGGATGTTGTCAACAGCAG	11:19180105-19180105-	G
11:19180105-19180105-|ABE|+|A:G|GAA:GGA|nucleotide|(ABE;+;@16;NG;GAA:GGA;E:G;)	nucleotide mutations; remove mode	CTGGGATGTTGTCAACAGCAGG	11:19180105-19180105-	G
11:19180105-19180105-|ABE|+|A:G|GAA:GGA|nucleotide|(ABE;+;@15;NGG;GAA:GGA;E:G;)	nucleotide mutations; remove mode	GCTGGGATGTTGTCAACAGCAGG	11:19180105-19180105-	G
25:1335170-1335170+|ABE|+|A:G|GAA:GGA|nucleotide|(ABE;+;@14;NG;GAA:GGA;E:G;)	nucleotide mutations; remove mode	AGGGCGGACGGAGGGCGGACAG	25:1335170-1335170+	G
25:1335170-1335170+|ABE|+|A:G|GAA:GGA|nucleotide|(ABE;+;@16;NG;GAA:GGA;E:G;)	nucleotide mutations; remove mode	GGCGGACGGAGGGCGGACAGAG	25:1335170-1335170+	G
25:1335170-1335170+|ABE|+|A:G|GAA:GGA|nucleotide|(ABE;+;@17;NG;GAA:GGA;E:G;)	nucleotide mutations; remove mode	GCGGACGGAGGGCGGACAGAGG	25:1335170-1335170+	G
25:1335170-1335170+|ABE|+|A:G|GAA:GGA|nucleotide|(ABE;+;@16;NGG;GAA:GGA;E:G;)	nucleotide mutations; remove mode	GGCGGACGGAGGGCGGACAGAGG	25:1335170-1335170+	G
25:1335170-1335170+|ABE|+|A:G|GAA:GGA|nucleotide|(ABE;+;@17;NGG;GAA:GGA;E:G;)	nucleotide mutations; remove mode	GCGGACGGAGGGCGGACAGAGGG	25:1335170-1335170+	G
4:60510374-60510374-|ABE|+|A:G|AAC:AGC|nucleotide|(ABE;+;@14;NG;AAC:AGC;N:S;)	nucleotide mutations; remove mode	CCAGGAGCTTACAGGCTGAGAG	4:60510374-60510374-	G
26:789739-789739+|ABE|+|A:G|AAC:AGC|nucleotide|(ABE;+;@13;NG;AAC:AGC;N:S;)	nucleotide mutations; remove mode	TGACCCAGCCTTCATTACACAG	26:789739-789739+	G
26:778900-778900+|ABE|+|A:G|GAC:GGC|nucleotide|(ABE;+;@13;NG;GAC:GGC;D:G;)	nucleotide mutations; remove mode	GCCCGAGGCAGCGCCCCAGGTG	26:778900-778900+	G
26:778900-778900+|ABE|+|A:G|GAC:GGC|nucleotide|(ABE;+;@17;NG;GAC:GGC;D:G;)	nucleotide mutations; remove mode	GAGGCAGCGCCCCAGGTGTGTG	26:778900-778900+	G
22:961751-961751-|ABE|+|A:G|GAC:GGC|nucleotide|(ABE;+;@14;NG;GAC:GGC;D:G;)	nucleotide mutations; remove mode	GTGACGGCTTTAAAGCAGAACG	22:961751-961751-	G
22:961751-961751-|ABE|+|A:G|GAC:GGC|nucleotide|(ABE;+;@14;NGG;GAC:GGC;D:G;)	nucleotide mutations; remove mode	GTGACGGCTTTAAAGCAGAACGG	22:961751-961751-	G
26:649677-649677+|ABE|+|A:G|GAC:GGC|nucleotide|(ABE;+;@13;NG;GAC:GGC;D:G;)	nucleotide mutations; remove mode	AAACGAGGCTGAGCTATGTGGG	26:649677-649677+	G
26:649677-649677+|ABE|+|A:G|GAC:GGC|nucleotide|(ABE;+;@14;NG;GAC:GGC;D:G;)	nucleotide mutations; remove mode	AACGAGGCTGAGCTATGTGGGG	26:649677-649677+	G
26:649677-649677+|ABE|+|A:G|GAC:GGC|nucleotide|(ABE;+;@15;NG;GAC:GGC;D:G;)	nucleotide mutations; remove mode	ACGAGGCTGAGCTATGTGGGGG	26:649677-649677+	G
26:649677-649677+|ABE|+|A:G|GAC:GGC|nucleotide|(ABE;+;@17;NG;GAC:GGC;D:G;)	nucleotide mutations; remove mode	GAGGCTGAGCTATGTGGGGGGG	26:649677-649677+	G
26:649677-649677+|ABE|+|A:G|GAC:GGC|nucleotide|(ABE;+;@13;NGG;GAC:GGC;D:G;)	nucleotide mutations; remove mode	AAACGAGGCTGAGCTATGTGGGG	26:649677-649677+	G
26:649677-649677+|ABE|+|A:G|GAC:GGC|nucleotide|(ABE;+;@14;NGG;GAC:GGC;D:G;)	nucleotide mutations; remove mode	AACGAGGCTGAGCTATGTGGGGG	26:649677-649677+	G
26:649677-649677+|ABE|+|A:G|GAC:GGC|nucleotide|(ABE;+;@15;NGG;GAC:GGC;D:G;)	nucleotide mutations; remove mode	ACGAGGCTGAGCTATGTGGGGGG	26:649677-649677+	G
Z:44899634-44899634+|ABE|+|A:G|GAC:GGC|nucleotide|(ABE;+;@17;NG;GAC:GGC;D:G;)	nucleotide mutations; remove mode	CGGGCCCAAGCTAAAAGGGCAG	Z:44899634-44899634+	G
Z:44899634-44899634+|ABE|+|A:G|GAC:GGC|nucleotide|(ABE;+;@17;NGG;GAC:GGC;D:G;)	nucleotide mutations; remove mode	CGGGCCCAAGCTAAAAGGGCAGG	Z:44899634-44899634+	G
1:189094740-189094740+|ABE|+|A:G|GAT:GGT|nucleotide|(ABE;+;@14;NG;GAT:GGT;D:G;)	nucleotide mutations; remove mode	CTGAGGGTTGCCTTTCAAAGCG	1:189094740-189094740+	G
28:838835-838835-|ABE|+|A:G|AAA:AGA|nucleotide|(ABE;+;@13;NG;AAA:AGA;K:R;)	nucleotide mutations; remove mode	CTGCGGAGACCCCCGAGGACCG	28:838835-838835-	G
21:521241-521241+|ABE|+|A:G|CAC:CGC|nucleotide|(ABE;+;@15;NG;CAC:CGC;H:R;)	nucleotide mutations; remove mode	CGCGCGCAGGCGCAGTAGTTGG	21:521241-521241+	G
21:521241-521241+|ABE|+|A:G|CAC:CGC|nucleotide|(ABE;+;@16;NG;CAC:CGC;H:R;)	nucleotide mutations; remove mode	GCGCGCAGGCGCAGTAGTTGGG	21:521241-521241+	G
21:521241-521241+|ABE|+|A:G|CAC:CGC|nucleotide|(ABE;+;@15;NGG;CAC:CGC;H:R;)	nucleotide mutations; remove mode	CGCGCGCAGGCGCAGTAGTTGGG	21:521241-521241+	G
21:603920-603920+|ABE|+|A:G|CAC:CGC|nucleotide|(ABE;+;@16;NG;CAC:CGC;H:R;)	nucleotide mutations; remove mode	CGCCGCACAACGCCGCTCCCCG	21:603920-603920+	G
27:1787545-1787545-|ABE|+|A:G|GAG:GGG|nucleotide|(ABE;+;@16;NG;GAG:GGG;E:G;)	nucleotide mutations; remove mode	CCCGGGCATGGCGGAGGTGTTG	27:1787545-1787545-	G
27:1787545-1787545-|ABE|+|A:G|GAG:GGG|nucleotide|(ABE;+;@17;NG;GAG:GGG;E:G;)	nucleotide mutations; remove mode	CCGGGCATGGCGGAGGTGTTGG	27:1787545-1787545-	G
27:1787545-1787545-|ABE|+|A:G|GAG:GGG|nucleotide|(ABE;+;@16;NGG;GAG:GGG;E:G;)	nucleotide mutations; remove mode	CCCGGGCATGGCGGAGGTGTTGG	27:1787545-1787545-	G
26:1529064-1529064-|ABE|+|A:G|GAG:GGG|nucleotide|(ABE;+;@13;NG;GAG:GGG;E:G;)	nucleotide mutations; remove mode	TGAGATGGGAATCACCCTGCAG	26:1529064-1529064-	G
27:2961185-2961185+|ABE|+|A:G|GAG:GGG|nucleotide|(ABE;+;@14;NG;GAG:GGG;E:G;)	nucleotide mutations; remove mode	CTGCAGGGGGCGCCCTCCCCCG	27:2961185-2961185+	G
21:266163-266163+|ABE|+|A:G|GAG:GGG|nucleotide|(ABE;+;@17;NG;GAG:GGG;E:G;)	nucleotide mutations; remove mode	GGGGGGGAGGGAAGGGGGTATG	21:266163-266163+	G
26:1628742-1628742+|ABE|+|A:G|GAG:GGG|nucleotide|(ABE;+;@16;NG;GAG:GGG;E:G;)	nucleotide mutations; remove mode	CCAGGGAGCTCTTTGGCACCAG	26:1628742-1628742+	G
26:1968316-1968316+|ABE|+|A:G|GAG:GGG|nucleotide|(ABE;+;@14;NG;GAG:GGG;E:G;)	nucleotide mutations; remove mode	AGCGAGGGAGCGCGCACGCAAG	26:1968316-1968316+	G
26:1968316-1968316+|ABE|+|A:G|GAG:GGG|nucleotide|(ABE;+;@17;NG;GAG:GGG;E:G;)	nucleotide mutations; remove mode	GAGGGAGCGCGCACGCAAGGAG	26:1968316-1968316+	G
26:1968316-1968316+|ABE|+|A:G|GAG:GGG|nucleotide|(ABE;+;@14;NGG;GAG:GGG;E:G;)	nucleotide mutations; remove mode	AGCGAGGGAGCGCGCACGCAAGG	26:1968316-1968316+	G
26:1968316-1968316+|ABE|+|A:G|GAG:GGG|nucleotide|(ABE;+;@17;NGG;GAG:GGG;E:G;)	nucleotide mutations; remove mode	GAGGGAGCGCGCACGCAAGGAGG	26:1968316-1968316+	G
14:12890378-12890378-|ABE|+|A:G|TAC:TGC|nucleotide|(ABE;+;@15;NG;TAC:TGC;Y:C;)	nucleotide mutations; remove mode	TGCCTGCAGTAGCCTTTGACTG	14:12890378-12890378-	G
14:12890378-12890378-|ABE|+|A:G|TAC:TGC|nucleotide|(ABE;+;@16;NG;TAC:TGC;Y:C;)	nucleotide mutations; remove mode	GCCTGCAGTAGCCTTTGACTGG	14:12890378-12890378-	G
14:12890378-12890378-|ABE|+|A:G|TAC:TGC|nucleotide|(ABE;+;@17;NG;TAC:TGC;Y:C;)	nucleotide mutations; remove mode	CCTGCAGTAGCCTTTGACTGGG	14:12890378-12890378-	G
14:12890378-12890378-|ABE|+|A:G|TAC:TGC|nucleotide|(ABE;+;@15;NGG;TAC:TGC;Y:C;)	nucleotide mutations; remove mode	TGCCTGCAGTAGCCTTTGACTGG	14:12890378-12890378-	G
14:12890378-12890378-|ABE|+|A:G|TAC:TGC|nucleotide|(ABE;+;@16;NGG;TAC:TGC;Y:C;)	nucleotide mutations; remove mode	GCCTGCAGTAGCCTTTGACTGGG	14:12890378-12890378-	G
26:2090592-2090592-|ABE|+|A:G|TAC:TGC|nucleotide|(ABE;+;@17;NG;TAC:TGC;Y:C;)	nucleotide mutations; remove mode	CCTGCCAGCAGGAAGGGCTCTG	26:2090592-2090592-	G
4:60552450-60552450+|ABE|+|A:G|TAG:TGG|nucleotide|(ABE;+;@13;NG;TAG:TGG;*:W;)	nucleotide mutations; remove mode	AGCAGCTGGGCCACAAATCAGG	4:60552450-60552450+	G
28:820369-820369-|ABE|+|A:G|TAG:TGG|nucleotide|(ABE;+;@16;NG;TAG:TGG;*:W;)	nucleotide mutations; remove mode	ACGTGGCATTTCTTCTTCTCAG	28:820369-820369-	G
26:2156319-2156319+|ABE|+|A:G|CAA:CGA|nucleotide|(ABE;+;@14;NG;CAA:CGA;Q:R;)	nucleotide mutations; remove mode	CACTGCGACTTTCAGGGCGCCG	26:2156319-2156319+	G
26:2156319-2156319+|ABE|+|A:G|CAA:CGA|nucleotide|(ABE;+;@16;NG;CAA:CGA;Q:R;)	nucleotide mutations; remove mode	CTGCGACTTTCAGGGCGCCGTG	26:2156319-2156319+	G
11:19283723-19283723+|ABE|+|A:G|CAC:CGC|nucleotide|(ABE;+;@13;NG;CAC:CGC;H:R;)	nucleotide mutations; remove mode	CCGTAGCGCCGCGCGGGGTCCG	11:19283723-19283723+	G
11:19692763-19692763+|ABE|+|A:G|GAT:GGT|nucleotide|(ABE;+;@15;NG;GAT:GGT;D:G;)	nucleotide mutations; remove mode	CCTGGGTAATGAGGCACATGCG	11:19692763-19692763+	G
11:19965064-19965064-|ABE|+|A:G|AAT:AGT|nucleotide|(ABE;+;@14;NG;AAT:AGT;N:S;)	nucleotide mutations; remove mode	GGGGTAGTGATGGGTGGGTGCG	11:19965064-19965064-	G
28:1980244-1980244+|ABE|+|A:G|AAC:AGC|nucleotide|(ABE;+;@16;NG;AAC:AGC;N:S;)	nucleotide mutations; remove mode	TTCAGCTGTAGCTCACAGCCTG	28:1980244-1980244+	G
28:1980244-1980244+|ABE|+|A:G|AAC:AGC|nucleotide|(ABE;+;@16;NGG;AAC:AGC;N:S;)	nucleotide mutations; remove mode	TTCAGCTGTAGCTCACAGCCTGG	28:1980244-1980244+	G
23:1558186-1558186-|ABE|+|A:G|TAC:TGC|nucleotide|(ABE;+;@13;NG;TAC:TGC;Y:C;)	nucleotide mutations; remove mode	TAGTACTGCTCAGTAACATTTG	23:1558186-1558186-	G
23:1578911-1578911+|ABE|+|A:G|TAA:TGA|nucleotide|(ABE;+;@14;NG;TAA:TGA;*:*;)	nucleotide mutations; remove mode	GGGGCTGACTGCTCGTTCAGAG	23:1578911-1578911+	G
23:1578911-1578911+|ABE|+|A:G|TAA:TGA|nucleotide|(ABE;+;@16;NG;TAA:TGA;*:*;)	nucleotide mutations; remove mode	GGCTGACTGCTCGTTCAGAGCG	23:1578911-1578911+	G
23:1578911-1578911+|ABE|+|A:G|TAA:TGA|nucleotide|(ABE;+;@17;NG;TAA:TGA;*:*;)	nucleotide mutations; remove mode	GCTGACTGCTCGTTCAGAGCGG	23:1578911-1578911+	G
23:1578911-1578911+|ABE|+|A:G|TAA:TGA|nucleotide|(ABE;+;@16;NGG;TAA:TGA;*:*;)	nucleotide mutations; remove mode	GGCTGACTGCTCGTTCAGAGCGG	23:1578911-1578911+	G
23:1578911-1578911+|ABE|+|A:G|TAA:TGA|nucleotide|(ABE;+;@17;NGG;TAA:TGA;*:*;)	nucleotide mutations; remove mode	GCTGACTGCTCGTTCAGAGCGGG	23:1578911-1578911+	G
23:1670971-1670971+|ABE|+|A:G|CAT:CGT|nucleotide|(ABE;+;@14;NG;CAT:CGT;H:R;)	nucleotide mutations; remove mode	TTCAGCGTTGGGGTCTAGTATG	23:1670971-1670971+	G
17:10869041-10869041-|ABE|-|T:C|GTT:GCT|nucleotide|(ABE;-;@15;NG;GTT:GCT;V:A;)	nucleotide mutations; remove mode	ATATAGCTTTTCTTCATTTCTG	17:10869041-10869041-	G
21:1372124-1372124+|ABE|-|T:C|GTT:GCT|nucleotide|(ABE;-;@15;NG;GTT:GCT;V:A;)	nucleotide mutations; remove mode	CAGGAGCCTGCTCTGGGAAGTG	21:1372124-1372124+	G
11:20040436-20040436+|ABE|-|T:C|GTG:GCG|nucleotide|(ABE;-;@16;NG;GTG:GCG;V:A;)	nucleotide mutations; remove mode	CAGCGCAGCACTTAGAAGGCAG	11:20040436-20040436+	G
11:20040436-20040436+|ABE|-|T:C|GTG:GCG|nucleotide|(ABE;-;@13;NG;GTG:GCG;V:A;)	nucleotide mutations; remove mode	CGTCAGCGCAGCACTTAGAAGG	11:20040436-20040436+	G
17:10448255-10448255+|ABE|-|T:C|GTG:GCG|nucleotide|(ABE;-;@17;NG;GTG:GCG;V:A;)	nucleotide mutations; remove mode	TCCGCACCGCGCGGCTCCGGCG	17:10448255-10448255+	G
17:10448255-10448255+|ABE|-|T:C|GTG:GCG|nucleotide|(ABE;-;@15;NG;GTG:GCG;V:A;)	nucleotide mutations; remove mode	CCTCCGCACCGCGCGGCTCCGG	17:10448255-10448255+	G
26:2534765-2534765+|ABE|-|T:C|TTT:TCT|nucleotide|(ABE;-;@13;NG;TTT:TCT;F:S;)	nucleotide mutations; remove mode	GAGGGGAGAAGCGCCGCCGCCG	26:2534765-2534765+	G
2:98537192-98537192+|ABE|-|T:C|CTT:CCT|nucleotide|(ABE;-;@16;NGG;CTT:CCT;L:P;)	nucleotide mutations; remove mode	GGGAGGGGTGGAGGGCGGGCTGG	2:98537192-98537192+	G
2:98537192-98537192+|ABE|-|T:C|CTT:CCT|nucleotide|(ABE;-;@16;NG;CTT:CCT;L:P;)	nucleotide mutations; remove mode	GGGAGGGGTGGAGGGCGGGCTG	2:98537192-98537192+	G
2:98537192-98537192+|ABE|-|T:C|CTT:CCT|nucleotide|(ABE;-;@13;NG;CTT:CCT;L:P;)	nucleotide mutations; remove mode	GCCGGGAGGGGTGGAGGGCGGG	2:98537192-98537192+	G
13:1650900-1650900-|ABE|-|T:C|CTT:CCT|nucleotide|(ABE;-;@14;NG;CTT:CCT;L:P;)	nucleotide mutations; remove mode	CGCCGAGGAACGTGACGTAGCG	13:1650900-1650900-	G
25:2806515-2806515+|ABE|-|T:C|GTC:GCC|nucleotide|(ABE;-;@16;NGG;GTC:GCC;V:A;)	nucleotide mutations; remove mode	TGGGGCAGATGCAGACCCATGGG	25:2806515-2806515+	G
25:2806515-2806515+|ABE|-|T:C|GTC:GCC|nucleotide|(ABE;-;@15;NGG;GTC:GCC;V:A;)	nucleotide mutations; remove mode	ATGGGGCAGATGCAGACCCATGG	25:2806515-2806515+	G
25:2806515-2806515+|ABE|-|T:C|GTC:GCC|nucleotide|(ABE;-;@16;NG;GTC:GCC;V:A;)	nucleotide mutations; remove mode	TGGGGCAGATGCAGACCCATGG	25:2806515-2806515+	G
25:2806515-2806515+|ABE|-|T:C|GTC:GCC|nucleotide|(ABE;-;@15;NG;GTC:GCC;V:A;)	nucleotide mutations; remove mode	ATGGGGCAGATGCAGACCCATG	25:2806515-2806515+	G
15:742848-742848+|ABE|-|T:C|GTC:GCC|nucleotide|(ABE;-;@16;NGG;GTC:GCC;V:A;)	nucleotide mutations; remove mode	GGGGGCAGCGCCCCGCAGCACGG	15:742848-742848+	G
15:742848-742848+|ABE|-|T:C|GTC:GCC|nucleotide|(ABE;-;@17;NG;GTC:GCC;V:A;)	nucleotide mutations; remove mode	GGGGCAGCGCCCCGCAGCACGG	15:742848-742848+	G
15:742848-742848+|ABE|-|T:C|GTC:GCC|nucleotide|(ABE;-;@16;NG;GTC:GCC;V:A;)	nucleotide mutations; remove mode	GGGGGCAGCGCCCCGCAGCACG	15:742848-742848+	G
17:10786782-10786782-|ABE|-|T:C|TTG:TCG|nucleotide|(ABE;-;@17;NG;TTG:TCG;L:S;)	nucleotide mutations; remove mode	TCCGATTTATAGGAGCAGATTG	17:10786782-10786782-	G
17:9999113-9999113+|ABE|-|T:C|CTG:CCG|nucleotide|(ABE;-;@16;NG;CTG:CCG;L:P;)	nucleotide mutations; remove mode	GGGCGGACTACGCTTCCCGGCG	17:9999113-9999113+	G
23:2364474-2364474-|ABE|-|T:C|CTG:CCG|nucleotide|(ABE;-;@15;NG;CTG:CCG;L:P;)	nucleotide mutations; remove mode	ACAACGGCTGGGGAAATAAAAG	23:2364474-2364474-	G
11:488589-488589+|ABE|-|T:C|TTA:TCA|nucleotide|(ABE;-;@14;NG;TTA:TCA;L:S;)	nucleotide mutations; remove mode	GCTGCTGAGCAGCGTGGCGTGG	11:488589-488589+	G
24:1075777-1075777+|ABE|-|T:C|TTA:TCA|nucleotide|(ABE;-;@13;NG;TTA:TCA;L:S;)	nucleotide mutations; remove mode	CTGTACTGATGACTGAGACTTG	24:1075777-1075777+	G
28:2143280-2143280+|ABE|-|T:C|CTC:CCC|nucleotide|(ABE;-;@16;NGG;CTC:CCC;L:P;)	nucleotide mutations; remove mode	CGAGGGGAGGGGGGAGGAGGGGG	28:2143280-2143280+	G
28:2143280-2143280+|ABE|-|T:C|CTC:CCC|nucleotide|(ABE;-;@15;NGG;CTC:CCC;L:P;)	nucleotide mutations; remove mode	GCGAGGGGAGGGGGGAGGAGGGG	28:2143280-2143280+	G
28:2143280-2143280+|ABE|-|T:C|CTC:CCC|nucleotide|(ABE;-;@14;NGG;CTC:CCC;L:P;)	nucleotide mutations; remove mode	GGCGAGGGGAGGGGGGAGGAGGG	28:2143280-2143280+	G
28:2143280-2143280+|ABE|-|T:C|CTC:CCC|nucleotide|(ABE;-;@13;NGG;CTC:CCC;L:P;)	nucleotide mutations; remove mode	GGGCGAGGGGAGGGGGGAGGAGG	28:2143280-2143280+	G
28:2143280-2143280+|ABE|-|T:C|CTC:CCC|nucleotide|(ABE;-;@17;NG;CTC:CCC;L:P;)	nucleotide mutations; remove mode	GAGGGGAGGGGGGAGGAGGGGG	28:2143280-2143280+	G
28:2143280-2143280+|ABE|-|T:C|CTC:CCC|nucleotide|(ABE;-;@16;NG;CTC:CCC;L:P;)	nucleotide mutations; remove mode	CGAGGGGAGGGGGGAGGAGGGG	28:2143280-2143280+	G
28:2143280-2143280+|ABE|-|T:C|CTC:CCC|nucleotide|(ABE;-;@15;NG;CTC:CCC;L:P;)	nucleotide mutations; remove mode	GCGAGGGGAGGGGGGAGGAGGG	28:2143280-2143280+	G
28:2143280-2143280+|ABE|-|T:C|CTC:CCC|nucleotide|(ABE;-;@14;NG;CTC:CCC;L:P;)	nucleotide mutations; remove mode	GGCGAGGGGAGGGGGGAGGAGG	28:2143280-2143280+	G
28:2143280-2143280+|ABE|-|T:C|CTC:CCC|nucleotide|(ABE;-;@13;NG;CTC:CCC;L:P;)	nucleotide mutations; remove mode	GGGCGAGGGGAGGGGGGAGGAG	28:2143280-2143280+	G
18:1061903-1061903+|ABE|-|T:C|TTC:TCC|nucleotide|(ABE;-;@16;NG;TTC:TCC;F:S;)	nucleotide mutations; remove mode	TGAGGAGCGAAAGACGACCCGG	18:1061903-1061903+	G
18:1715958-1715958-|ABE|-|T:C|TTC:TCC|nucleotide|(ABE;-;@17;NGG;TTC:TCC;F:S;)	nucleotide mutations; remove mode	CCGGATGGGAAAACTTCCCCTGG	18:1715958-1715958-	G
18:1715958-1715958-|ABE|-|T:C|TTC:TCC|nucleotide|(ABE;-;@17;NG;TTC:TCC;F:S;)	nucleotide mutations; remove mode	CCGGATGGGAAAACTTCCCCTG	18:1715958-1715958-	G
27:3530497-3530497+|ABE|-|T:C|TTC:TCC|nucleotide|(ABE;-;@14;NG;TTC:TCC;F:S;)	nucleotide mutations; remove mode	AGAGGGGAGGGAGGGGTTAACG	27:3530497-3530497+	G
26:2686643-2686643+|ABE|-|T:C|ATG:ACG|nucleotide|(ABE;-;@16;NG;ATG:ACG;M:T;)	nucleotide mutations; remove mode	CCTCGTCAGGGCGGAGCGGCCG	26:2686643-2686643+	G
18:2219839-2219839+|ABE|-|T:C|ATC:ACC|nucleotide|(ABE;-;@16;NGG;ATC:ACC;I:T;)	nucleotide mutations; remove mode	CGGGGTGAGTAACCGCCTCAGGG	18:2219839-2219839+	G
18:2219839-2219839+|ABE|-|T:C|ATC:ACC|nucleotide|(ABE;-;@17;NG;ATC:ACC;I:T;)	nucleotide mutations; remove mode	GGGGTGAGTAACCGCCTCAGGG	18:2219839-2219839+	G
18:2219839-2219839+|ABE|-|T:C|ATC:ACC|nucleotide|(ABE;-;@16;NG;ATC:ACC;I:T;)	nucleotide mutations; remove mode	CGGGGTGAGTAACCGCCTCAGG	18:2219839-2219839+	G
21:1900079-1900079+|ABE|-|T:C|ATC:ACC|nucleotide|(ABE;-;@14;NG;ATC:ACC;I:T;)	nucleotide mutations; remove mode	GCAGAGGTCAGTTACATGGCAG	21:1900079-1900079+	G
11:713160-713160+|ABE|-|T:C|ATC:ACC|nucleotide|(ABE;-;@14;NGG;ATC:ACC;I:T;)	nucleotide mutations; remove mode	CGTGAGGTGCCGCCGTGGGCGGG	11:713160-713160+	G
11:713160-713160+|ABE|-|T:C|ATC:ACC|nucleotide|(ABE;-;@13;NGG;ATC:ACC;I:T;)	nucleotide mutations; remove mode	GCGTGAGGTGCCGCCGTGGGCGG	11:713160-713160+	G
11:713160-713160+|ABE|-|T:C|ATC:ACC|nucleotide|(ABE;-;@15;NG;ATC:ACC;I:T;)	nucleotide mutations; remove mode	GTGAGGTGCCGCCGTGGGCGGG	11:713160-713160+	G
11:713160-713160+|ABE|-|T:C|ATC:ACC|nucleotide|(ABE;-;@14;NG;ATC:ACC;I:T;)	nucleotide mutations; remove mode	CGTGAGGTGCCGCCGTGGGCGG	11:713160-713160+	G
11:713160-713160+|ABE|-|T:C|ATC:ACC|nucleotide|(ABE;-;@13;NG;ATC:ACC;I:T;)	nucleotide mutations; remove mode	GCGTGAGGTGCCGCCGTGGGCG	11:713160-713160+	G
1:102609938-102609938-|ABE|-|T:C|CTT:CCT|nucleotide|(ABE;-;@17;NG;CTT:CCT;L:P;)	nucleotide mutations; remove mode	AGAGGATCCCTGTTAATTTTCG	1:102609938-102609938-	G
17:9259427-9259427-|ABE|-|T:C|ATT:ACT|nucleotide|(ABE;-;@16;NGG;ATT:ACT;I:T;)	nucleotide mutations; remove mode	CATAGTGCTATGCTTGCTGGAGG	17:9259427-9259427-	G
17:9259427-9259427-|ABE|-|T:C|ATT:ACT|nucleotide|(ABE;-;@16;NG;ATT:ACT;I:T;)	nucleotide mutations; remove mode	CATAGTGCTATGCTTGCTGGAG	17:9259427-9259427-	G
27:3606401-3606401+|ABE|-|T:C|ATA:ACA|nucleotide|(ABE;-;@14;NG;ATA:ACA;I:T;)	nucleotide mutations; remove mode	CCCAGTGTATACCATCTATGAG	27:3606401-3606401+	G
13:8450153-8450153+|ABE|-|T:C|TTT:TCT|nucleotide|(ABE;-;@13;NG;TTT:TCT;F:S;)	nucleotide mutations; remove mode	GAACGTAGAACGGCGGTCCCCG	13:8450153-8450153+	G
18:9191772-9191772+|ABE|-|T:C|CTC:CCC|nucleotide|(ABE;-;@17;NGG;CTC:CCC;L:P;)	nucleotide mutations; remove mode	GCGGGCACTGCGGATCTTGGCGG	18:9191772-9191772+	G
18:9191772-9191772+|ABE|-|T:C|CTC:CCC|nucleotide|(ABE;-;@17;NG;CTC:CCC;L:P;)	nucleotide mutations; remove mode	GCGGGCACTGCGGATCTTGGCG	18:9191772-9191772+	G
22:1615779-1615779+|Target-AID|-|G:A|AGG:AAG|nucleotide|(Target-AID;-;@18;NGG;AGG:AAG;R:K;)	nucleotide mutations; remove mode	ACTTATCTCCTACATGAGCTGGG	22:1615779-1615779+	T
22:1615779-1615779+|Target-AID|-|G:A|AGG:AAG|nucleotide|(Target-AID;-;@17;NGG;AGG:AAG;R:K;)	nucleotide mutations; remove mode	GACTTATCTCCTACATGAGCTGG	22:1615779-1615779+	T
22:1615779-1615779+|Target-AID|-|G:A|AGG:AAG|nucleotide|(Target-AID;-;@18;NG;AGG:AAG;R:K;)	nucleotide mutations; remove mode	ACTTATCTCCTACATGAGCTGG	22:1615779-1615779+	T
22:1615779-1615779+|Target-AID|-|G:A|AGG:AAG|nucleotide|(Target-AID;-;@17;NG;AGG:AAG;R:K;)	nucleotide mutations; remove mode	GACTTATCTCCTACATGAGCTG	22:1615779-1615779+	T
22:1636248-1636248-|Target-AID|-|G:A|CGG:CAG|nucleotide|(Target-AID;-;@17;NG;CGG:CAG;R:Q;)	nucleotide mutations; remove mode	TTCTGCCCATCCCAACCCTGAG	22:1636248-1636248-	T
18:4117190-4117190-|Target-AID|-|G:A|CGG:CAG|nucleotide|(Target-AID;-;@19;NGG;CGG:CAG;R:Q;)	nucleotide mutations; remove mode	CTGCAACGCGCGCCCGGGGCCGG	18:4117190-4117190-	T
18:4117190-4117190-|Target-AID|-|G:A|CGG:CAG|nucleotide|(Target-AID;-;@19;NG;CGG:CAG;R:Q;)	nucleotide mutations; remove mode	CTGCAACGCGCGCCCGGGGCCG	18:4117190-4117190-	T
10:2334946-2334946+|Target-AID|-|G:A|CGG:CAG|nucleotide|(Target-AID;-;@18;NGG;CGG:CAG;R:Q;)	nucleotide mutations; remove mode	CCTGCAGGCGGCGCCCGGCGGGG	10:2334946-2334946+	T
10:2334946-2334946+|Target-AID|-|G:A|CGG:CAG|nucleotide|(Target-AID;-;@19;NG;CGG:CAG;R:Q;)	nucleotide mutations; remove mode	CTGCAGGCGGCGCCCGGCGGGG	10:2334946-2334946+	T
10:2334946-2334946+|Target-AID|-|G:A|CGG:CAG|nucleotide|(Target-AID;-;@18;NG;CGG:CAG;R:Q;)	nucleotide mutations; remove mode	CCTGCAGGCGGCGCCCGGCGGG	10:2334946-2334946+	T
24:2545822-2545822+|Target-AID|-|G:A|GGG:GAG|nucleotide|(Target-AID;-;@17;NGG;GGG:GAG;G:E;)	nucleotide mutations; remove mode	CGCTCAGCGCCGGGGCGGAGGGG	24:2545822-2545822+	T
24:2545822-2545822+|Target-AID|-|G:A|GGG:GAG|nucleotide|(Target-AID;-;@17;NG;GGG:GAG;G:E;)	nucleotide mutations; remove mode	CGCTCAGCGCCGGGGCGGAGGG	24:2545822-2545822+	T
24:2568308-2568308+|Target-AID|-|G:A|GGG:GAG|nucleotide|(Target-AID;-;@19;NG;GGG:GAG;G:E;)	nucleotide mutations; remove mode	CTCAGGGTGGGGCGAGGGCGCG	24:2568308-2568308+	T
18:3404510-3404510+|Target-AID|-|G:A|GGT:GAT|nucleotide|(Target-AID;-;@18;NGG;GGT:GAT;G:D;)	nucleotide mutations; remove mode	AATCATAGCCCCGCCCACCTCGG	18:3404510-3404510+	T
18:3404510-3404510+|Target-AID|-|G:A|GGT:GAT|nucleotide|(Target-AID;-;@19;NG;GGT:GAT;G:D;)	nucleotide mutations; remove mode	ATCATAGCCCCGCCCACCTCGG	18:3404510-3404510+	T
18:3404510-3404510+|Target-AID|-|G:A|GGT:GAT|nucleotide|(Target-AID;-;@18;NG;GGT:GAT;G:D;)	nucleotide mutations; remove mode	AATCATAGCCCCGCCCACCTCG	18:3404510-3404510+	T
26:3550397-3550397-|Target-AID|-|G:A|GGC:GAC|nucleotide|(Target-AID;-;@18;NG;GGC:GAC;G:D;)	nucleotide mutations; remove mode	GGTCCCATCGGCTGTCCCGCAG	26:3550397-3550397-	T
18:3519820-3519820-|Target-AID|-|G:A|AGT:AAT|nucleotide|(Target-AID;-;@17;NG;AGT:AAT;S:N;)	nucleotide mutations; remove mode	TCATTCATACACTTGGCTAGTG	18:3519820-3519820-	T
9:1162678-1162678+|Target-AID|-|G:A|AGC:AAC|nucleotide|(Target-AID;-;@19;NG;AGC:AAC;S:N;)	nucleotide mutations; remove mode	GTTCCCGGCCCGCGGTAGGGCG	9:1162678-1162678+	T
21:2335718-2335718+|Target-AID|-|G:A|AGC:AAC|nucleotide|(Target-AID;-;@19;NGG;AGC:AAC;S:N;)	nucleotide mutations; remove mode	GTTCAGCCTGCGGGAGGTGCTGG	21:2335718-2335718+	T
21:2335718-2335718+|Target-AID|-|G:A|AGC:AAC|nucleotide|(Target-AID;-;@19;NG;AGC:AAC;S:N;)	nucleotide mutations; remove mode	GTTCAGCCTGCGGGAGGTGCTG	21:2335718-2335718+	T
18:4027225-4027225+|Target-AID|-|G:A|GGC:GAC|nucleotide|(Target-AID;-;@18;NGG;GGC:GAC;G:D;)	nucleotide mutations; remove mode	TGTCTAAAAAGGGCTGCTTCTGG	18:4027225-4027225+	T
18:4027225-4027225+|Target-AID|-|G:A|GGC:GAC|nucleotide|(Target-AID;-;@19;NG;GGC:GAC;G:D;)	nucleotide mutations; remove mode	GTCTAAAAAGGGCTGCTTCTGG	18:4027225-4027225+	T
18:4027225-4027225+|Target-AID|-|G:A|GGC:GAC|nucleotide|(Target-AID;-;@18;NG;GGC:GAC;G:D;)	nucleotide mutations; remove mode	TGTCTAAAAAGGGCTGCTTCTG	18:4027225-4027225+	T
17:8574404-8574404+|Target-AID|-|G:A|GGC:GAC|nucleotide|(Target-AID;-;@18;NG;GGC:GAC;G:D;)	nucleotide mutations; remove mode	TGTCGGGGACGGGGCGGCACCG	17:8574404-8574404+	T
18:4574840-4574840-|Target-AID|-|G:A|GGC:GAC|nucleotide|(Target-AID;-;@17;NG;GGC:GAC;G:D;)	nucleotide mutations; remove mode	ACGTCTGAGGGGGGAAAAGGAG	18:4574840-4574840-	T
12:891287-891287-|Target-AID|-|G:A|CGG:CAG|nucleotide|(Target-AID;-;@18;NG;CGG:CAG;R:Q;)	nucleotide mutations; remove mode	ACTGATGCTCCTGGGTTGCCAG	12:891287-891287-	T
21:2460965-2460965+|Target-AID|-|G:A|CGG:CAG|nucleotide|(Target-AID;-;@18;NG;CGG:CAG;R:Q;)	nucleotide mutations; remove mode	GCTGTCCGCTCAGCAGCGGGTG	21:2460965-2460965+	T
Z:8540892-8540892-|Target-AID|-|G:A|CGG:CAG|nucleotide|(Target-AID;-;@17;NG;CGG:CAG;R:Q;)	nucleotide mutations; remove mode	AGCTGAAAAGTGCTCAAGATAG	Z:8540892-8540892-	T
28:2782240-2782240+|Target-AID|-|G:A|GGG:GAG|nucleotide|(Target-AID;-;@17;NG;GGG:GAG;G:E;)	nucleotide mutations; remove mode	CACTCACGGCCCAGCTGTGCAG	28:2782240-2782240+	T
18:4549221-4549221+|Target-AID|-|G:A|GGG:GAG|nucleotide|(Target-AID;-;@17;NGG;GGG:GAG;G:E;)	nucleotide mutations; remove mode	GACTCCTTGAGCGCGGCTGGCGG	18:4549221-4549221+	T
18:4549221-4549221+|Target-AID|-|G:A|GGG:GAG|nucleotide|(Target-AID;-;@17;NG;GGG:GAG;G:E;)	nucleotide mutations; remove mode	GACTCCTTGAGCGCGGCTGGCG	18:4549221-4549221+	T
15:1315752-1315752+|Target-AID|+|C:T|CCG:CTG|nucleotide|(Target-AID;+;@17;NG;CCG:CTG;P:L;)	nucleotide mutations; remove mode	CGCTGCTCGGCCACGGCTCGGG	15:1315752-1315752+	T
15:1315752-1315752+|Target-AID|+|C:T|CCG:CTG|nucleotide|(Target-AID;+;@18;NG;CCG:CTG;P:L;)	nucleotide mutations; remove mode	GCTGCTCGGCCACGGCTCGGGG	15:1315752-1315752+	T
15:1315752-1315752+|Target-AID|+|C:T|CCG:CTG|nucleotide|(Target-AID;+;@17;NGG;CCG:CTG;P:L;)	nucleotide mutations; remove mode	CGCTGCTCGGCCACGGCTCGGGG	15:1315752-1315752+	T
13:3487960-3487960-|Target-AID|+|C:T|GCT:GTT|nucleotide|(Target-AID;+;@19;NG;GCT:GTT;A:V;)	nucleotide mutations; remove mode	GTTCTGTGTTTCCTGAGGTCTG	13:3487960-3487960-	T
13:3487960-3487960-|Target-AID|+|C:T|GCT:GTT|nucleotide|(Target-AID;+;@19;NGG;GCT:GTT;A:V;)	nucleotide mutations; remove mode	GTTCTGTGTTTCCTGAGGTCTGG	13:3487960-3487960-	T
Z:72942523-72942523+|Target-AID|+|C:T|GCG:GTG|nucleotide|(Target-AID;+;@19;NG;GCG:GTG;A:V;)	nucleotide mutations; remove mode	GTGCCGCCGCAGGGCCGGGCAG	Z:72942523-72942523+	T
Z:72942523-72942523+|Target-AID|+|C:T|GCG:GTG|nucleotide|(Target-AID;+;@19;NGG;GCG:GTG;A:V;)	nucleotide mutations; remove mode	GTGCCGCCGCAGGGCCGGGCAGG	Z:72942523-72942523+	T
8:1592776-1592776-|Target-AID|+|C:T|GCC:GTC|nucleotide|(Target-AID;+;@18;NG;GCC:GTC;A:V;)	nucleotide mutations; remove mode	TGTCGTGAGACACTAAAATCAG	8:1592776-1592776-	T
5:56223949-56223949-|Target-AID|+|C:T|GCC:GTC|nucleotide|(Target-AID;+;@18;NG;GCC:GTC;A:V;)	nucleotide mutations; remove mode	GGTCGGAGCTCAGAGGTGATGG	5:56223949-56223949-	T
7:22255113-22255113-|Target-AID|+|C:T|CCT:CTT|nucleotide|(Target-AID;+;@18;NG;CCT:CTT;P:L;)	nucleotide mutations; remove mode	CCTTGCAAGTGCCTGAAGCCAG	7:22255113-22255113-	T
14:14865900-14865900-|Target-AID|+|C:T|CCA:CTA|nucleotide|(Target-AID;+;@17;NG;CCA:CTA;P:L;)	nucleotide mutations; remove mode	TTCTACTTTACACCTTTTTCTG	14:14865900-14865900-	T
15:3066100-3066100-|Target-AID|+|C:T|CCA:CTA|nucleotide|(Target-AID;+;@18;NG;CCA:CTA;P:L;)	nucleotide mutations; remove mode	ACTATCACATAAAAGTGAATAG	15:3066100-3066100-	T
15:3066100-3066100-|Target-AID|+|C:T|CCA:CTA|nucleotide|(Target-AID;+;@18;NGG;CCA:CTA;P:L;)	nucleotide mutations; remove mode	ACTATCACATAAAAGTGAATAGG	15:3066100-3066100-	T
14:13262649-13262649-|Target-AID|+|C:T|CCC:CTC|nucleotide|(Target-AID;+;@17;NG;CCC:CTC;P:L;)	nucleotide mutations; remove mode	TTCTCTCTTGTTTCCTTGCTGG	14:13262649-13262649-	T
14:13262649-13262649-|Target-AID|+|C:T|CCC:CTC|nucleotide|(Target-AID;+;@19;NG;CCC:CTC;P:L;)	nucleotide mutations; remove mode	CTCTCTTGTTTCCTTGCTGGGG	14:13262649-13262649-	T
14:13262649-13262649-|Target-AID|+|C:T|CCC:CTC|nucleotide|(Target-AID;+;@17;NGG;CCC:CTC;P:L;)	nucleotide mutations; remove mode	TTCTCTCTTGTTTCCTTGCTGGG	14:13262649-13262649-	T
Z:73017141-73017141+|Target-AID|+|C:T|CCC:CTC|nucleotide|(Target-AID;+;@17;NG;CCC:CTC;P:L;)	nucleotide mutations; remove mode	CGCTCGGGAGGAACGAAGGGCG	Z:73017141-73017141+	T
Z:73017141-73017141+|Target-AID|+|C:T|CCC:CTC|nucleotide|(Target-AID;+;@19;NG;CCC:CTC;P:L;)	nucleotide mutations; remove mode	CTCGGGAGGAACGAAGGGCGCG	Z:73017141-73017141+	T
9:2544369-2544369-|Target-AID|+|C:T|CCG:CTG|nucleotide|(Target-AID;+;@17;NG;CCG:CTG;P:L;)	nucleotide mutations; remove mode	CTCTGTCCCCGCTGGATGGCAG	9:2544369-2544369-	T
8:3686952-3686952+|Target-AID|+|C:T|CCG:CTG|nucleotide|(Target-AID;+;@19;NG;CCG:CTG;P:L;)	nucleotide mutations; remove mode	CTGCTGTGCTGGCTGCTGACTG	8:3686952-3686952+	T
8:3686952-3686952+|Target-AID|+|C:T|CCG:CTG|nucleotide|(Target-AID;+;@19;NGG;CCG:CTG;P:L;)	nucleotide mutations; remove mode	CTGCTGTGCTGGCTGCTGACTGG	8:3686952-3686952+	T
23:4113629-4113629+|Target-AID|+|C:T|ACC:ATC|nucleotide|(Target-AID;+;@17;NG;ACC:ATC;T:I;)	nucleotide mutations; remove mode	CCATCGGACGCATGCGCACTCG	23:4113629-4113629+	T
23:4113629-4113629+|Target-AID|+|C:T|ACC:ATC|nucleotide|(Target-AID;+;@18;NG;ACC:ATC;T:I;)	nucleotide mutations; remove mode	CATCGGACGCATGCGCACTCGG	23:4113629-4113629+	T
23:4113629-4113629+|Target-AID|+|C:T|ACC:ATC|nucleotide|(Target-AID;+;@17;NGG;ACC:ATC;T:I;)	nucleotide mutations; remove mode	CCATCGGACGCATGCGCACTCGG	23:4113629-4113629+	T

## Sheet: Macaca fascicularis
guide: id	mutation format; mode of mutagenesis	guide+PAM sequence	genome coordinate	nucleotide mutation	transcript: id	amino acid mutation	aminoacid: position
ENSMFAT00000000050|15|-|5197204|5197249|93|(ABE;-;@16;NG;GTG:GCG;V:A;)	amino acid mutations; create mode	GTCCACCTTCTCCGCCACCGTG			ENSMFAT00000000050	A	93
ENSMFAT00000000050|15|-|5197204|5197249|93|(ABE;-;@14;NG;GTG:GCG;V:A;)	amino acid mutations; create mode	CGGTCCACCTTCTCCGCCACCG			ENSMFAT00000000050	A	93
ENSMFAT00000000051|15|-|5197204|5197249|28|(ABE;-;@16;NG;GTG:GCG;V:A;)	amino acid mutations; create mode	GTCCACCTTCTCCGCCACCGTG			ENSMFAT00000000051	A	28
ENSMFAT00000000051|15|-|5197204|5197249|28|(ABE;-;@14;NG;GTG:GCG;V:A;)	amino acid mutations; create mode	CGGTCCACCTTCTCCGCCACCG			ENSMFAT00000000051	A	28
ENSMFAT00000000052|15|-|5197204|5197249|93|(ABE;-;@16;NG;GTG:GCG;V:A;)	amino acid mutations; create mode	GTCCACCTTCTCCGCCACCGTG			ENSMFAT00000000052	A	93
ENSMFAT00000000052|15|-|5197204|5197249|93|(ABE;-;@14;NG;GTG:GCG;V:A;)	amino acid mutations; create mode	CGGTCCACCTTCTCCGCCACCG			ENSMFAT00000000052	A	93
ENSMFAT00000000057|1|-|217961049|217961094|8|(ABE;-;@17;NG;GTG:GCG;V:A;)	amino acid mutations; create mode	GCCACCTTCACTGAGGCTCCCG			ENSMFAT00000000057	A	8
ENSMFAT00000000058|1|-|217961049|217961094|8|(ABE;-;@17;NG;GTG:GCG;V:A;)	amino acid mutations; create mode	GCCACCTTCACTGAGGCTCCCG			ENSMFAT00000000058	A	8
ENSMFAT00000000059|1|-|217961049|217961094|8|(ABE;-;@17;NG;GTG:GCG;V:A;)	amino acid mutations; create mode	GCCACCTTCACTGAGGCTCCCG			ENSMFAT00000000059	A	8
ENSMFAT00000000061|1|-|217961049|217961094|8|(ABE;-;@17;NG;GTG:GCG;V:A;)	amino acid mutations; create mode	GCCACCTTCACTGAGGCTCCCG			ENSMFAT00000000061	A	8
ENSMFAT00000000062|1|-|217961049|217961094|8|(ABE;-;@17;NG;GTG:GCG;V:A;)	amino acid mutations; create mode	GCCACCTTCACTGAGGCTCCCG			ENSMFAT00000000062	A	8
ENSMFAT00000000065|1|-|217961049|217961094|8|(ABE;-;@17;NG;GTG:GCG;V:A;)	amino acid mutations; create mode	GCCACCTTCACTGAGGCTCCCG			ENSMFAT00000000065	A	8
ENSMFAT00000000066|1|-|217961049|217961094|8|(ABE;-;@17;NG;GTG:GCG;V:A;)	amino acid mutations; create mode	GCCACCTTCACTGAGGCTCCCG			ENSMFAT00000000066	A	8
ENSMFAT00000000338|18|-|23205993|23206038|21|(ABE;+;@14;NG;GGA:GGG;G:G;)	amino acid mutations; create mode	CAAGGGAGACAGGGTTAAATGG			ENSMFAT00000000338	G	21
ENSMFAT00000000399|18|+|12621465|12621510|4|(ABE;+;@14;NG;GGA:GGG;G:G;)	amino acid mutations; create mode	TAAGGGAGGAGCTCCCCCATGG			ENSMFAT00000000399	G	4
ENSMFAT00000000413|13|+|14206594|14206639|58|(ABE;+;@15;NG;GAG:GGG;E:G;)	amino acid mutations; create mode	CAAGGAGCTGGTGAACGCCGTG			ENSMFAT00000000413	G	58
ENSMFAT00000000413|13|+|14206594|14206639|58|(ABE;+;@16;NG;GAG:GGG;E:G;)	amino acid mutations; create mode	AAGGAGCTGGTGAACGCCGTGG			ENSMFAT00000000413	G	58
ENSMFAT00000000413|13|+|14206594|14206639|58|(ABE;+;@15;NGG;GAG:GGG;E:G;)	amino acid mutations; create mode	CAAGGAGCTGGTGAACGCCGTGG			ENSMFAT00000000413	G	58
ENSMFAT00000000438|8|+|59653711|59653756|16|(ABE;+;@15;NG;GAC:GGC;D:G;)	amino acid mutations; create mode	CAAGGACTTAAAGGAGAAGAAG			ENSMFAT00000000438	G	16
ENSMFAT00000000438|8|+|59653711|59653756|16|(ABE;+;@16;NG;GAC:GGC;D:G;)	amino acid mutations; create mode	AAGGACTTAAAGGAGAAGAAGG			ENSMFAT00000000438	G	16
ENSMFAT00000000438|8|+|59653711|59653756|16|(ABE;+;@15;NGG;GAC:GGC;D:G;)	amino acid mutations; create mode	CAAGGACTTAAAGGAGAAGAAGG			ENSMFAT00000000438	G	16
ENSMFAT00000000439|20|+|992462|992507|78|(Target-AID;+;@17;NG;GGC:GGT;G:G;)	amino acid mutations; create mode	GGGCTACGACTGGAGCCTGGTG			ENSMFAT00000000439	G	78
ENSMFAT00000000515|4|+|100627407|100627452|63|(Target-AID;+;@17;NG;ACT:ATT;T:I;)	amino acid mutations; create mode	AGACTAGATGCTGATCCAAAAG			ENSMFAT00000000515	I	63
ENSMFAT00000000515|4|+|100627407|100627452|63|(Target-AID;+;@18;NG;ACT:ATT;T:I;)	amino acid mutations; create mode	GACTAGATGCTGATCCAAAAGG			ENSMFAT00000000515	I	63
ENSMFAT00000000515|4|+|100627407|100627452|63|(Target-AID;+;@17;NGG;ACT:ATT;T:I;)	amino acid mutations; create mode	AGACTAGATGCTGATCCAAAAGG			ENSMFAT00000000515	I	63
ENSMFAT00000000521|17|+|59498408|59498453|13|(Target-AID;-;@18;NG;ATG:ATA;M:I;)	amino acid mutations; create mode	CGCATCTTGGCGCCCTGTGCGG			ENSMFAT00000000521	I	13
ENSMFAT00000000557|3|-|109774789|109774834|5|(Target-AID;-;@17;NG;GAA:AAA;E:K;)	amino acid mutations; create mode	CTTCCTTGTACGCCATGGCAGG			ENSMFAT00000000557	K	5
ENSMFAT00000000573|4|-|129640946|129640991|5|(Target-AID;-;@17;NG;GAA:AAA;E:K;)	amino acid mutations; create mode	CTTCCTTCTGGGCCATGGAGGG			ENSMFAT00000000573	K	5
ENSMFAT00000000576|12|+|3743040|3743085|4|(Target-AID;-;@19;NG;AGA:AAA;R:K;)	amino acid mutations; create mode	TCTTTTTCCCATCCTGATTCAG			ENSMFAT00000000576	K	4
ENSMFAT00000000580|12|+|3743040|3743085|4|(Target-AID;-;@19;NG;AGA:AAA;R:K;)	amino acid mutations; create mode	TCTTTTTCCCATCCTGATTCAG			ENSMFAT00000000580	K	4
ENSMFAT00000000597|12|+|3743040|3743085|4|(Target-AID;-;@19;NG;AGA:AAA;R:K;)	amino acid mutations; create mode	TCTTTTTCCCATCCTGATTCAG			ENSMFAT00000000597	K	4
ENSMFAT00000000630|8|-|103506427|103506472|29|(Target-AID;-;@19;NG;CTG:CTA;L:L;)	amino acid mutations; create mode	TCAGCTTCTCAGAAACTTCCCG			ENSMFAT00000000630	L	29
ENSMFAT00000000662|8|-|103506427|103506472|29|(Target-AID;-;@19;NG;CTG:CTA;L:L;)	amino acid mutations; create mode	TCAGCTTCTCAGAAACTTCCCG			ENSMFAT00000000662	L	29
ENSMFAT00000000716|1|+|226748998|226749043|6|(Target-AID;-;@17;NG;GAC:AAC;D:N;)	amino acid mutations; create mode	AGTCCTTTTCATCACCCATTTG			ENSMFAT00000000716	N	6
ENSMFAT00000000717|1|+|226748998|226749043|6|(Target-AID;-;@17;NG;GAC:AAC;D:N;)	amino acid mutations; create mode	AGTCCTTTTCATCACCCATTTG			ENSMFAT00000000717	N	6
ENSMFAT00000000719|17|+|37133427|37133472|20|(Target-AID;+;@17;NG;AAC:AAT;N:N;)	amino acid mutations; create mode	GAACCTCAACTACTCCGTGCCG			ENSMFAT00000000719	N	20
ENSMFAT00000000719|17|+|37133427|37133472|20|(Target-AID;+;@17;NGG;AAC:AAT;N:N;)	amino acid mutations; create mode	GAACCTCAACTACTCCGTGCCGG			ENSMFAT00000000719	N	20
ENSMFAT00000000770|1|-|212676154|212676199|5|(ABE;-;@14;NGG;CCT:CCC;P:P;)	amino acid mutations; create mode	CTTCTCAGGCTTTGAGGCCATGG			ENSMFAT00000000770	P	5
ENSMFAT00000000770|1|-|212676154|212676199|5|(ABE;-;@15;NG;CCT:CCC;P:P;)	amino acid mutations; create mode	TTCTCAGGCTTTGAGGCCATGG			ENSMFAT00000000770	P	5
ENSMFAT00000000770|1|-|212676154|212676199|5|(ABE;-;@14;NG;CCT:CCC;P:P;)	amino acid mutations; create mode	CTTCTCAGGCTTTGAGGCCATG			ENSMFAT00000000770	P	5
ENSMFAT00000000772|1|-|212676154|212676199|5|(ABE;-;@14;NGG;CCT:CCC;P:P;)	amino acid mutations; create mode	CTTCTCAGGCTTTGAGGCCATGG			ENSMFAT00000000772	P	5
ENSMFAT00000000772|1|-|212676154|212676199|5|(ABE;-;@15;NG;CCT:CCC;P:P;)	amino acid mutations; create mode	TTCTCAGGCTTTGAGGCCATGG			ENSMFAT00000000772	P	5
ENSMFAT00000000772|1|-|212676154|212676199|5|(ABE;-;@14;NG;CCT:CCC;P:P;)	amino acid mutations; create mode	CTTCTCAGGCTTTGAGGCCATG			ENSMFAT00000000772	P	5
ENSMFAT00000000783|14|+|72461886|72461931|30|(ABE;-;@16;NG;CTC:CCC;L:P;)	amino acid mutations; create mode	GCAGAGCTTCACCACTGCCCCG			ENSMFAT00000000783	P	30
ENSMFAT00000000785|14|-|16286305|16286350|15|(ABE;-;@15;NGG;TCG:CCG;S:P;)	amino acid mutations; create mode	CACCGATTTGGTGGTCTCATAGG			ENSMFAT00000000785	P	15
ENSMFAT00000000785|14|-|16286305|16286350|15|(ABE;-;@16;NG;TCG:CCG;S:P;)	amino acid mutations; create mode	ACCGATTTGGTGGTCTCATAGG			ENSMFAT00000000785	P	15
ENSMFAT00000000785|14|-|16286305|16286350|15|(ABE;-;@15;NG;TCG:CCG;S:P;)	amino acid mutations; create mode	CACCGATTTGGTGGTCTCATAG			ENSMFAT00000000785	P	15
ENSMFAT00000000790|9|+|132800218|132800263|75|(Target-AID;+;@19;NG;CCC:CCT;P:P;)	amino acid mutations; create mode	CCAGGTAAGCGGCTGGGCAGTG			ENSMFAT00000000790	P	75
ENSMFAT00000000792|14|-|16286305|16286350|15|(ABE;-;@15;NGG;TCG:CCG;S:P;)	amino acid mutations; create mode	CACCGATTTGGTGGTCTCATAGG			ENSMFAT00000000792	P	15
ENSMFAT00000000792|14|-|16286305|16286350|15|(ABE;-;@16;NG;TCG:CCG;S:P;)	amino acid mutations; create mode	ACCGATTTGGTGGTCTCATAGG			ENSMFAT00000000792	P	15
ENSMFAT00000000792|14|-|16286305|16286350|15|(ABE;-;@15;NG;TCG:CCG;S:P;)	amino acid mutations; create mode	CACCGATTTGGTGGTCTCATAG			ENSMFAT00000000792	P	15
ENSMFAT00000000795|9|+|132800218|132800263|64|(Target-AID;+;@19;NG;CCC:CCT;P:P;)	amino acid mutations; create mode	CCAGGTAAGCGGCTGGGCAGTG			ENSMFAT00000000795	P	64
ENSMFAT00000000853|19|+|44328754|44328799|12|(Target-AID;-;@18;NG;CAG:CAA;Q:Q;)	amino acid mutations; create mode	TGCTGCTTCATGTTCTCTTCAG			ENSMFAT00000000853	Q	12
ENSMFAT00000000932|2|+|104338321|104338366|80|(ABE;+;@16;NG;CAG:CGG;Q:R;)	amino acid mutations; create mode	AAGCAGGTGCTAGTGGTGGGTG			ENSMFAT00000000932	R	80
ENSMFAT00000000932|2|+|104338321|104338366|80|(ABE;+;@17;NG;CAG:CGG;Q:R;)	amino acid mutations; create mode	AGCAGGTGCTAGTGGTGGGTGG			ENSMFAT00000000932	R	80
ENSMFAT00000000932|2|+|104338321|104338366|80|(ABE;+;@16;NGG;CAG:CGG;Q:R;)	amino acid mutations; create mode	AAGCAGGTGCTAGTGGTGGGTGG			ENSMFAT00000000932	R	80
ENSMFAT00000000945|10|+|47392|47437|8|(Target-AID;+;@17;NG;CCC:TCC;P:S;)	amino acid mutations; create mode	AAACCCAGTGAGCTGGACCAAG			ENSMFAT00000000945	S	8
ENSMFAT00000000945|10|+|47392|47437|8|(Target-AID;+;@17;NGG;CCC:TCC;P:S;)	amino acid mutations; create mode	AAACCCAGTGAGCTGGACCAAGG			ENSMFAT00000000945	S	8
ENSMFAT00000000950|10|+|47392|47437|8|(Target-AID;+;@17;NG;CCC:TCC;P:S;)	amino acid mutations; create mode	AAACCCAGTGAGCTGGACCAAG			ENSMFAT00000000950	S	8
ENSMFAT00000000950|10|+|47392|47437|8|(Target-AID;+;@17;NGG;CCC:TCC;P:S;)	amino acid mutations; create mode	AAACCCAGTGAGCTGGACCAAGG			ENSMFAT00000000950	S	8
ENSMFAT00000001001|5|+|105761290|105761335|10|(ABE;-;@15;NGG;ATG:ACG;M:T;)	amino acid mutations; create mode	TTGCCATTTTTGCCAAGAGACGG			ENSMFAT00000001001	T	10
ENSMFAT00000001001|5|+|105761290|105761335|10|(ABE;-;@16;NG;ATG:ACG;M:T;)	amino acid mutations; create mode	TGCCATTTTTGCCAAGAGACGG			ENSMFAT00000001001	T	10
ENSMFAT00000001001|5|+|105761290|105761335|10|(ABE;-;@15;NG;ATG:ACG;M:T;)	amino acid mutations; create mode	TTGCCATTTTTGCCAAGAGACG			ENSMFAT00000001001	T	10
ENSMFAT00000001064|19|+|38717053|38717098|80|(Target-AID;+;@17;NG;GCG:GTG;A:V;)	amino acid mutations; create mode	AGGCGGTCACTGGACCTTGCCG			ENSMFAT00000001064	V	80
ENSMFAT00000001064|19|+|38717053|38717098|80|(Target-AID;+;@19;NG;GCG:GTG;A:V;)	amino acid mutations; create mode	GCGGTCACTGGACCTTGCCGTG			ENSMFAT00000001064	V	80
ENSMFAT00000001091|8|-|74867276|74867321|19|(ABE;+;@16;NG;ATG:GTG;M:V;)	amino acid mutations; create mode	TAAGATGTTCTCAGTGCAGCTG			ENSMFAT00000001091	V	19
ENSMFAT00000001095|4|+|166971437|166971482|38|(ABE;+;@17;NG;ATC:GTC;I:V;)	amino acid mutations; create mode	AAAATCCTCCCAGCTGGAAGGG			ENSMFAT00000001095	V	38
ENSMFAT00000001163|10|+|67307369|67307414|4|(Target-AID;+;@17;NG;CAT:TAT;H:Y;)	amino acid mutations; create mode	AAGCATCCACCTAACAGACGAG			ENSMFAT00000001163	Y	4
ENSMFAT00000001163|10|+|67307369|67307414|4|(Target-AID;+;@18;NG;CAT:TAT;H:Y;)	amino acid mutations; create mode	AGCATCCACCTAACAGACGAGG			ENSMFAT00000001163	Y	4
ENSMFAT00000001163|10|+|67307369|67307414|4|(Target-AID;+;@17;NGG;CAT:TAT;H:Y;)	amino acid mutations; create mode	AAGCATCCACCTAACAGACGAGG			ENSMFAT00000001163	Y	4
ENSMFAT00000001216|14|-|7614477|7614522|463|(Target-AID;+;@17;NG;CAC:TAC;H:Y;)	amino acid mutations; create mode	AAGCACCTGGTCCCCGGCGCTG			ENSMFAT00000001216	Y	463
ENSMFAT00000001236|16|-|49032894|49032939|118|(Target-AID;+;@19;NG;CAG:TAG;Q:*;)	amino acid mutations; create mode	GCAGTTTGCCGAAGAGCAGCAG			ENSMFAT00000001236	*	118
ENSMFAT00000001240|16|-|49032894|49032939|118|(Target-AID;+;@19;NG;CAG:TAG;Q:*;)	amino acid mutations; create mode	GCAGTTTGCCGAAGAGCAGCAG			ENSMFAT00000001240	*	118
ENSMFAT00000001244|16|-|49032894|49032939|117|(Target-AID;+;@19;NG;CAG:TAG;Q:*;)	amino acid mutations; create mode	GCAGTTTGCCGAAGAGCAGCAG			ENSMFAT00000001244	*	117
ENSMFAT00000001253|16|-|49032894|49032939|118|(Target-AID;+;@19;NG;CAG:TAG;Q:*;)	amino acid mutations; create mode	GCAGTTTGCCGAAGAGCAGCAG			ENSMFAT00000001253	*	118
ENSMFAT00000000029|17|-|81838603|81838648|6|(Target-AID;+;@17;NG;GCC:GCT;A:A;)	amino acid mutations; remove mode	GGCTGGGAAGGACTCTGGAACG			ENSMFAT00000000029	A	6
ENSMFAT00000000029|17|-|81838603|81838648|6|(Target-AID;+;@18;NG;GCC:GCT;A:A;)	amino acid mutations; remove mode	GCTGGGAAGGACTCTGGAACGG			ENSMFAT00000000029	A	6
ENSMFAT00000000029|17|-|81838603|81838648|6|(Target-AID;+;@17;NGG;GCC:GCT;A:A;)	amino acid mutations; remove mode	GGCTGGGAAGGACTCTGGAACGG			ENSMFAT00000000029	A	6
ENSMFAT00000000031|17|-|81838603|81838648|6|(Target-AID;+;@17;NG;GCC:GCT;A:A;)	amino acid mutations; remove mode	GGCTGGGAAGGACTCTGGAACG			ENSMFAT00000000031	A	6
ENSMFAT00000000031|17|-|81838603|81838648|6|(Target-AID;+;@18;NG;GCC:GCT;A:A;)	amino acid mutations; remove mode	GCTGGGAAGGACTCTGGAACGG			ENSMFAT00000000031	A	6
ENSMFAT00000000031|17|-|81838603|81838648|6|(Target-AID;+;@17;NGG;GCC:GCT;A:A;)	amino acid mutations; remove mode	GGCTGGGAAGGACTCTGGAACGG			ENSMFAT00000000031	A	6
ENSMFAT00000000032|17|-|81838603|81838648|6|(Target-AID;+;@17;NG;GCC:GCT;A:A;)	amino acid mutations; remove mode	GGCTGGGAAGGACTCTGGAACG			ENSMFAT00000000032	A	6
ENSMFAT00000000032|17|-|81838603|81838648|6|(Target-AID;+;@18;NG;GCC:GCT;A:A;)	amino acid mutations; remove mode	GCTGGGAAGGACTCTGGAACGG			ENSMFAT00000000032	A	6
ENSMFAT00000000032|17|-|81838603|81838648|6|(Target-AID;+;@17;NGG;GCC:GCT;A:A;)	amino acid mutations; remove mode	GGCTGGGAAGGACTCTGGAACGG			ENSMFAT00000000032	A	6
ENSMFAT00000000073|13|-|1250773|1250818|9|(ABE;-;@14;NG;GCT:GCC;A:A;)	amino acid mutations; remove mode	CTCGATGGCCTTGGTGGTCCCG			ENSMFAT00000000073	A	9
ENSMFAT00000000230|4|-|58358069|58358114|34|(Target-AID;-;@18;NG;GAG:AAG;E:K;)	amino acid mutations; remove mode	CTTCTTCACCCTGTGGGCAGAG			ENSMFAT00000000230	K	34
ENSMFAT00000000338|18|-|23205993|23206038|21|(Target-AID;-;@17;NG;GGG:GGA;G:G;)	amino acid mutations; remove mode	GTCTCCCTTGGATCTGCGTCTG			ENSMFAT00000000338	G	21
ENSMFAT00000000349|18|-|17761138|17761183|8|(Target-AID;-;@17;NG;GGC:AGC;G:S;)	amino acid mutations; remove mode	CGCTTTTATGGCCAGCTGCCTG			ENSMFAT00000000349	S	8
ENSMFAT00000000352|17|+|1787123|1787168|160|(Target-AID;-;@18;NGG;GGC:GAC;G:D;)	amino acid mutations; remove mode	GGTCCTTTACCAGAGTGGGCAGG			ENSMFAT00000000352	D	160
ENSMFAT00000000352|17|+|1787123|1787168|160|(Target-AID;-;@18;NG;GGC:GAC;G:D;)	amino acid mutations; remove mode	GGTCCTTTACCAGAGTGGGCAG			ENSMFAT00000000352	D	160
ENSMFAT00000000355|17|+|31370903|31370948|5|(Target-AID;-;@18;NG;GGG:GGA;G:G;)	amino acid mutations; remove mode	TTTCCTTTTGGCGGCATCTTGG			ENSMFAT00000000355	G	5
ENSMFAT00000000413|13|+|14206594|14206639|58|(Target-AID;-;@17;NG;GGG:GAG;G:E;)	amino acid mutations; remove mode	AGCTCCTTGAAGTGCGCGCGGG			ENSMFAT00000000413	E	58
ENSMFAT00000000414|17|-|66494664|66494709|26|(Target-AID;-;@17;NG;GGG:GAG;G:E;)	amino acid mutations; remove mode	TTCTCTTTGCAAACGTCCCCTG			ENSMFAT00000000414	E	26
ENSMFAT00000000425|17|+|90431590|90431635|67|(Target-AID;-;@18;NG;GGA:GAA;G:E;)	amino acid mutations; remove mode	ATTCTTTATAATCTGCGTTCTG			ENSMFAT00000000425	E	67
ENSMFAT00000000439|20|+|992462|992507|78|(ABE;-;@15;NG;GGT:GGC;G:G;)	amino acid mutations; remove mode	TCGTAGCCCTTGAGCACCTGCG			ENSMFAT00000000439	G	78
ENSMFAT00000000439|20|+|992462|992507|78|(ABE;-;@13;NG;GGT:GGC;G:G;)	amino acid mutations; remove mode	AGTCGTAGCCCTTGAGCACCTG			ENSMFAT00000000439	G	78
ENSMFAT00000000515|4|+|100627407|100627452|63|(ABE;-;@16;NG;ATT:ACT;I:T;)	amino acid mutations; remove mode	TCTAGTCTTTCCGCTCCTTGAG			ENSMFAT00000000515	T	63
ENSMFAT00000000515|4|+|100627407|100627452|63|(ABE;-;@14;NG;ATT:ACT;I:T;)	amino acid mutations; remove mode	CATCTAGTCTTTCCGCTCCTTG			ENSMFAT00000000515	T	63
ENSMFAT00000000521|17|+|59498408|59498453|13|(ABE;+;@15;NG;ATA:ATG;I:M;)	amino acid mutations; remove mode	AAGATGCGGCGGGGCGCGGGCG			ENSMFAT00000000521	M	13
ENSMFAT00000000545|2|+|107690240|107690285|3|(ABE;-;@15;NG;ATT:ACT;I:T;)	amino acid mutations; remove mode	TTAGAGTCTTCATTCGCTGCTG			ENSMFAT00000000545	T	3
ENSMFAT00000000549|2|+|107690240|107690285|3|(ABE;-;@15;NG;ATT:ACT;I:T;)	amino acid mutations; remove mode	TTAGAGTCTTCATTCGCTGCTG			ENSMFAT00000000549	T	3
ENSMFAT00000000552|2|+|107690240|107690285|3|(ABE;-;@15;NG;ATT:ACT;I:T;)	amino acid mutations; remove mode	TTAGAGTCTTCATTCGCTGCTG			ENSMFAT00000000552	T	3
ENSMFAT00000000630|8|-|103506427|103506472|29|(Target-AID;-;@19;NG;TTG:TTA;L:L;)	amino acid mutations; remove mode	TCAGCTTCTCAGAAACTTCCCG			ENSMFAT00000000630	L	29
ENSMFAT00000000632|11|+|108843637|108843682|39|(ABE;-;@13;NG;TTA:TCA;L:S;)	amino acid mutations; remove mode	AGCACGTGACTTCCGGCCCCGG			ENSMFAT00000000632	S	39
ENSMFAT00000000662|8|-|103506427|103506472|29|(Target-AID;-;@19;NG;TTG:TTA;L:L;)	amino acid mutations; remove mode	TCAGCTTCTCAGAAACTTCCCG			ENSMFAT00000000662	L	29
ENSMFAT00000000719|17|+|37133427|37133472|20|(ABE;-;@14;NGG;AAT:AAC;N:N;)	amino acid mutations; remove mode	GTTGAGGTTCTTTAGAGTGAGGG			ENSMFAT00000000719	N	20
ENSMFAT00000000719|17|+|37133427|37133472|20|(ABE;-;@13;NGG;AAT:AAC;N:N;)	amino acid mutations; remove mode	AGTTGAGGTTCTTTAGAGTGAGG			ENSMFAT00000000719	N	20
ENSMFAT00000000719|17|+|37133427|37133472|20|(ABE;-;@15;NG;AAT:AAC;N:N;)	amino acid mutations; remove mode	TTGAGGTTCTTTAGAGTGAGGG			ENSMFAT00000000719	N	20
ENSMFAT00000000719|17|+|37133427|37133472|20|(ABE;-;@14;NG;AAT:AAC;N:N;)	amino acid mutations; remove mode	GTTGAGGTTCTTTAGAGTGAGG			ENSMFAT00000000719	N	20
ENSMFAT00000000719|17|+|37133427|37133472|20|(ABE;-;@13;NG;AAT:AAC;N:N;)	amino acid mutations; remove mode	AGTTGAGGTTCTTTAGAGTGAG			ENSMFAT00000000719	N	20
ENSMFAT00000000723|X|+|133265796|133265841|27|(ABE;+;@17;NG;AAT:GAT;N:D;)	amino acid mutations; remove mode	AAGGATGGTGACACCCAGACCG			ENSMFAT00000000723	D	27
ENSMFAT00000000766|1|+|227096761|227096806|28|(ABE;-;@14;NGG;AAT:AAC;N:N;)	amino acid mutations; remove mode	CATGACGTTCTTGCCCGCAATGG			ENSMFAT00000000766	N	28
ENSMFAT00000000766|1|+|227096761|227096806|28|(ABE;-;@15;NG;AAT:AAC;N:N;)	amino acid mutations; remove mode	ATGACGTTCTTGCCCGCAATGG			ENSMFAT00000000766	N	28
ENSMFAT00000000766|1|+|227096761|227096806|28|(ABE;-;@14;NG;AAT:AAC;N:N;)	amino acid mutations; remove mode	CATGACGTTCTTGCCCGCAATG			ENSMFAT00000000766	N	28
ENSMFAT00000000785|14|-|16286305|16286350|15|(Target-AID;+;@18;NG;CCG:TCG;P:S;)	amino acid mutations; remove mode	AATCGGTGGTTGTGAAGAGCTG			ENSMFAT00000000785	S	15
ENSMFAT00000000785|14|-|16286305|16286350|15|(Target-AID;+;@19;NG;CCG:TCG;P:S;)	amino acid mutations; remove mode	ATCGGTGGTTGTGAAGAGCTGG			ENSMFAT00000000785	S	15
ENSMFAT00000000785|14|-|16286305|16286350|15|(Target-AID;+;@18;NGG;CCG:TCG;P:S;)	amino acid mutations; remove mode	AATCGGTGGTTGTGAAGAGCTGG			ENSMFAT00000000785	S	15
ENSMFAT00000000792|14|-|16286305|16286350|15|(Target-AID;+;@18;NG;CCG:TCG;P:S;)	amino acid mutations; remove mode	AATCGGTGGTTGTGAAGAGCTG			ENSMFAT00000000792	S	15
ENSMFAT00000000792|14|-|16286305|16286350|15|(Target-AID;+;@19;NG;CCG:TCG;P:S;)	amino acid mutations; remove mode	ATCGGTGGTTGTGAAGAGCTGG			ENSMFAT00000000792	S	15
ENSMFAT00000000792|14|-|16286305|16286350|15|(Target-AID;+;@18;NGG;CCG:TCG;P:S;)	amino acid mutations; remove mode	AATCGGTGGTTGTGAAGAGCTGG			ENSMFAT00000000792	S	15
ENSMFAT00000000853|19|+|44328754|44328799|12|(ABE;+;@14;NG;CAA:CAG;Q:Q;)	amino acid mutations; remove mode	GAAGCAGCAGGATTCACCCAAG			ENSMFAT00000000853	Q	12
ENSMFAT00000000853|19|+|44328754|44328799|12|(ABE;+;@17;NG;CAA:CAG;Q:Q;)	amino acid mutations; remove mode	GCAGCAGGATTCACCCAAGGAG			ENSMFAT00000000853	Q	12
ENSMFAT00000000853|19|+|44328754|44328799|12|(ABE;+;@14;NGG;CAA:CAG;Q:Q;)	amino acid mutations; remove mode	GAAGCAGCAGGATTCACCCAAGG			ENSMFAT00000000853	Q	12
ENSMFAT00000000855|17|-|59528298|59528343|3|(ABE;+;@16;NG;CAA:CGA;Q:R;)	amino acid mutations; remove mode	AAACGAGGAGGAAGAGATAGTG			ENSMFAT00000000855	R	3
ENSMFAT00000000902|15|+|45609604|45609649|74|(Target-AID;-;@18;NG;AGG:AAG;R:K;)	amino acid mutations; remove mode	TCTTCTTCATCCGCGGCCTGCG			ENSMFAT00000000902	K	74
ENSMFAT00000000913|6|+|148512536|148512581|32|(ABE;+;@16;NG;AGG:GGG;R:G;)	amino acid mutations; remove mode	CAAAGGGGAAGTGGTCCGCGTG			ENSMFAT00000000913	G	32
ENSMFAT00000000923|6|+|148512536|148512581|32|(ABE;+;@16;NG;AGG:GGG;R:G;)	amino acid mutations; remove mode	CAAAGGGGAAGTGGTCCGCGTG			ENSMFAT00000000923	G	32
ENSMFAT00000000933|14|+|72461817|72461862|12|(ABE;+;@17;NG;AGG:GGG;R:G;)	amino acid mutations; remove mode	TAGGGGGACTATGTGTGGATGG			ENSMFAT00000000933	G	12
ENSMFAT00000000940|13|-|35999835|35999880|52|(ABE;-;@15;NG;TCT:TCC;S:S;)	amino acid mutations; remove mode	AACGTGGACTTTCCCACAGCTG			ENSMFAT00000000940	S	52
ENSMFAT00000000948|13|-|35999835|35999880|52|(ABE;-;@15;NG;TCT:TCC;S:S;)	amino acid mutations; remove mode	AACGTGGACTTTCCCACAGCTG			ENSMFAT00000000948	S	52
ENSMFAT00000000952|13|-|35991099|35991144|54|(Target-AID;+;@18;NG;TCC:TCT;S:S;)	amino acid mutations; remove mode	TCTTGGAAACTTGCTGGATATG			ENSMFAT00000000952	S	54
ENSMFAT00000001048|4|+|118403058|118403103|5|(ABE;-;@14;NG;ACT:ACC;T:T;)	amino acid mutations; remove mode	ATGCAGGGTCTTCACTGTCATG			ENSMFAT00000001048	T	5
ENSMFAT00000001058|19|+|38710898|38710943|43|(ABE;+;@13;NG;GTA:GTG;V:V;)	amino acid mutations; remove mode	CGAAGGTGGTGGGCAGATGCCG			ENSMFAT00000001058	V	43
ENSMFAT00000001058|19|+|38710898|38710943|43|(ABE;+;@13;NGG;GTA:GTG;V:V;)	amino acid mutations; remove mode	CGAAGGTGGTGGGCAGATGCCGG			ENSMFAT00000001058	V	43
ENSMFAT00000001063|19|+|38710898|38710943|43|(ABE;+;@13;NG;GTA:GTG;V:V;)	amino acid mutations; remove mode	CGAAGGTGGTGGGCAGATGCCG			ENSMFAT00000001063	V	43
ENSMFAT00000001063|19|+|38710898|38710943|43|(ABE;+;@13;NGG;GTA:GTG;V:V;)	amino acid mutations; remove mode	CGAAGGTGGTGGGCAGATGCCGG			ENSMFAT00000001063	V	43
ENSMFAT00000001064|19|+|38717053|38717098|80|(ABE;-;@13;NG;GTG:GCG;V:A;)	amino acid mutations; remove mode	AGTGACCGCCTTGGCGGCACAG			ENSMFAT00000001064	A	80
ENSMFAT00000001068|11|+|54870187|54870232|7|(ABE;+;@15;NG;GTA:GTG;V:V;)	amino acid mutations; remove mode	AAGGTGGAAAAGATCGGAGAGG			ENSMFAT00000001068	V	7
ENSMFAT00000001068|11|+|54870187|54870232|7|(ABE;+;@15;NGG;GTA:GTG;V:V;)	amino acid mutations; remove mode	AAGGTGGAAAAGATCGGAGAGGG			ENSMFAT00000001068	V	7
ENSMFAT00000001069|11|+|54870187|54870232|7|(ABE;+;@15;NG;GTA:GTG;V:V;)	amino acid mutations; remove mode	AAGGTGGAAAAGATCGGAGAGG			ENSMFAT00000001069	V	7
ENSMFAT00000001069|11|+|54870187|54870232|7|(ABE;+;@15;NGG;GTA:GTG;V:V;)	amino acid mutations; remove mode	AAGGTGGAAAAGATCGGAGAGGG			ENSMFAT00000001069	V	7
ENSMFAT00000001087|10|+|66409758|66409803|24|(ABE;+;@13;NG;GTA:GTG;V:V;)	amino acid mutations; remove mode	CGAAGGTGCACGCTATCCCATG			ENSMFAT00000001087	V	24
ENSMFAT00000001087|10|+|66409758|66409803|24|(ABE;+;@15;NG;GTA:GTG;V:V;)	amino acid mutations; remove mode	AAGGTGCACGCTATCCCATGGG			ENSMFAT00000001087	V	24
ENSMFAT00000001087|10|+|66409758|66409803|24|(ABE;+;@13;NGG;GTA:GTG;V:V;)	amino acid mutations; remove mode	CGAAGGTGCACGCTATCCCATGG			ENSMFAT00000001087	V	24
ENSMFAT00000001090|4|+|166961201|166961246|27|(Target-AID;-;@18;NG;GTC:ATC;V:I;)	amino acid mutations; remove mode	GATCTTGTCACACCCACCATGG			ENSMFAT00000001090	I	27
ENSMFAT00000001091|8|-|74867276|74867321|19|(Target-AID;-;@17;NGG;GTG:ATG;V:M;)	amino acid mutations; remove mode	ACATCTTAGAAAAACATAAATGG			ENSMFAT00000001091	M	19
ENSMFAT00000001091|8|-|74867276|74867321|19|(Target-AID;-;@18;NG;GTG:ATG;V:M;)	amino acid mutations; remove mode	CATCTTAGAAAAACATAAATGG			ENSMFAT00000001091	M	19
ENSMFAT00000001091|8|-|74867276|74867321|19|(Target-AID;-;@17;NG;GTG:ATG;V:M;)	amino acid mutations; remove mode	ACATCTTAGAAAAACATAAATG			ENSMFAT00000001091	M	19
ENSMFAT00000001163|10|+|67307369|67307414|4|(ABE;-;@14;NG;TAT:CAT;Y:H;)	amino acid mutations; remove mode	GTGGATGCTTTGTCATTTTCAG			ENSMFAT00000001163	H	4
ENSMFAT00000001220|4|-|56041955|56042000|31|(ABE;-;@13;NG;TAC:CAC;Y:H;)	amino acid mutations; remove mode	AGACAGTGTTTGACTGTGGAAG			ENSMFAT00000001220	H	31
ENSMFAT00000001236|16|-|49032894|49032939|118|(ABE;-;@14;NG;TAG:CAG;*:Q;)	amino acid mutations; remove mode	CAAACTGCTTCTGCATGTCTGG			ENSMFAT00000001236	Q	118
ENSMFAT00000001240|16|-|49032894|49032939|118|(ABE;-;@14;NG;TAG:CAG;*:Q;)	amino acid mutations; remove mode	CAAACTGCTTCTGCATGTCTGG			ENSMFAT00000001240	Q	118
ENSMFAT00000001242|3|-|84473349|84473394|64|(ABE;+;@14;NG;TAG:TGG;*:W;)	amino acid mutations; remove mode	GTAAGTGGCTGTAACAGCCCAG			ENSMFAT00000001242	W	64
ENSMFAT00000001242|3|-|84473349|84473394|64|(ABE;+;@14;NGG;TAG:TGG;*:W;)	amino acid mutations; remove mode	GTAAGTGGCTGTAACAGCCCAGG			ENSMFAT00000001242	W	64
ENSMFAT00000001242|3|-|84473349|84473394|64|(ABE;+;@13;NG;TGA:TGG;*:W;)	amino acid mutations; remove mode	GTAAGTGGCTGTAACAGCCCAG			ENSMFAT00000001242	W	64
ENSMFAT00000001242|3|-|84473349|84473394|64|(ABE;+;@13;NGG;TGA:TGG;*:W;)	amino acid mutations; remove mode	GTAAGTGGCTGTAACAGCCCAGG			ENSMFAT00000001242	W	64
ENSMFAT00000001244|16|-|49032894|49032939|117|(ABE;-;@14;NG;TAG:CAG;*:Q;)	amino acid mutations; remove mode	CAAACTGCTTCTGCATGTCTGG			ENSMFAT00000001244	Q	117
ENSMFAT00000001253|16|-|49032894|49032939|118|(ABE;-;@14;NG;TAG:CAG;*:Q;)	amino acid mutations; remove mode	CAAACTGCTTCTGCATGTCTGG			ENSMFAT00000001253	Q	118
17:81838121-81838121-|Target-AID|-|G:A|AGT:AAT|nucleotide|(Target-AID;-;@18;NG;AGT:AAT;S:N;)	nucleotide mutations; create mode	AACTTCCAACTTGCTCAAATAG	17:81838121-81838121-	T
1:40303397-40303397-|Target-AID|-|G:A|AGT:AAT|nucleotide|(Target-AID;-;@17;NG;AGT:AAT;S:N;)	nucleotide mutations; create mode	AAACTCAGAGTATATAAACTTG	1:40303397-40303397-	T
1:217791585-217791585-|Target-AID|-|G:A|TGC:TAC|nucleotide|(Target-AID;-;@18;NGG;TGC:TAC;C:Y;)	nucleotide mutations; create mode	GGCAAAGCAACGGAAGTCTCCGG	1:217791585-217791585-	T
1:217791585-217791585-|Target-AID|-|G:A|TGC:TAC|nucleotide|(Target-AID;-;@19;NG;TGC:TAC;C:Y;)	nucleotide mutations; create mode	GCAAAGCAACGGAAGTCTCCGG	1:217791585-217791585-	T
1:217791585-217791585-|Target-AID|-|G:A|TGC:TAC|nucleotide|(Target-AID;-;@18;NG;TGC:TAC;C:Y;)	nucleotide mutations; create mode	GGCAAAGCAACGGAAGTCTCCG	1:217791585-217791585-	T
X:15174743-15174743+|Target-AID|-|G:A|TGC:TAC|nucleotide|(Target-AID;-;@17;NG;TGC:TAC;C:Y;)	nucleotide mutations; create mode	CGGCAAAGGCGCGATCTGGCAG	X:15174743-15174743+	T
9:18508214-18508214+|Target-AID|-|G:A|TGA:TAA|nucleotide|(Target-AID;-;@17;NGG;TGA:TAA;*:*;)	nucleotide mutations; create mode	GGTCACTGATGGAAATACAAAGG	9:18508214-18508214+	T
9:18508214-18508214+|Target-AID|-|G:A|TGA:TAA|nucleotide|(Target-AID;-;@18;NG;TGA:TAA;*:*;)	nucleotide mutations; create mode	GTCACTGATGGAAATACAAAGG	9:18508214-18508214+	T
9:18508214-18508214+|Target-AID|-|G:A|TGA:TAA|nucleotide|(Target-AID;-;@17;NG;TGA:TAA;*:*;)	nucleotide mutations; create mode	GGTCACTGATGGAAATACAAAG	9:18508214-18508214+	T
16:53822387-53822387-|Target-AID|-|G:A|TGA:TAA|nucleotide|(Target-AID;-;@19;NGG;TGA:TAA;*:*;)	nucleotide mutations; create mode	TCAAGCTGAGTTGGGTCCGTGGG	16:53822387-53822387-	T
16:53822387-53822387-|Target-AID|-|G:A|TGA:TAA|nucleotide|(Target-AID;-;@18;NGG;TGA:TAA;*:*;)	nucleotide mutations; create mode	CTCAAGCTGAGTTGGGTCCGTGG	16:53822387-53822387-	T
16:53822387-53822387-|Target-AID|-|G:A|TGA:TAA|nucleotide|(Target-AID;-;@19;NG;TGA:TAA;*:*;)	nucleotide mutations; create mode	TCAAGCTGAGTTGGGTCCGTGG	16:53822387-53822387-	T
16:53822387-53822387-|Target-AID|-|G:A|TGA:TAA|nucleotide|(Target-AID;-;@18;NG;TGA:TAA;*:*;)	nucleotide mutations; create mode	CTCAAGCTGAGTTGGGTCCGTG	16:53822387-53822387-	T
12:95951848-95951848+|Target-AID|-|G:A|GGT:GAT|nucleotide|(Target-AID;-;@17;NGG;GGT:GAT;G:D;)	nucleotide mutations; create mode	TTACCAGAAACATATGAGACTGG	12:95951848-95951848+	T
12:95951848-95951848+|Target-AID|-|G:A|GGT:GAT|nucleotide|(Target-AID;-;@17;NG;GGT:GAT;G:D;)	nucleotide mutations; create mode	TTACCAGAAACATATGAGACTG	12:95951848-95951848+	T
5:127799532-127799532+|Target-AID|-|G:A|TGA:TAA|nucleotide|(Target-AID;-;@19;NGG;TGA:TAA;*:*;)	nucleotide mutations; create mode	TCAGTCATCAGAGATTCATTTGG	5:127799532-127799532+	T
5:127799532-127799532+|Target-AID|-|G:A|TGA:TAA|nucleotide|(Target-AID;-;@19;NG;TGA:TAA;*:*;)	nucleotide mutations; create mode	TCAGTCATCAGAGATTCATTTG	5:127799532-127799532+	T
19:21391290-21391290-|Target-AID|-|G:A|AGT:AAT|nucleotide|(Target-AID;-;@18;NG;AGT:AAT;S:N;)	nucleotide mutations; create mode	CACTGGCAAAAGAGATTACCAG	19:21391290-21391290-	T
9:101422016-101422016+|Target-AID|-|G:A|CGC:CAC|nucleotide|(Target-AID;-;@17;NG;CGC:CAC;R:H;)	nucleotide mutations; create mode	CTGCGCTGCCTTCACAGCTCAG	9:101422016-101422016+	T
15:1938471-1938471+|Target-AID|-|G:A|CGT:CAT|nucleotide|(Target-AID;-;@18;NGG;CGT:CAT;R:H;)	nucleotide mutations; create mode	GACGCGGTTGCTGCGGGGGTCGG	15:1938471-1938471+	T
15:1938471-1938471+|Target-AID|-|G:A|CGT:CAT|nucleotide|(Target-AID;-;@18;NG;CGT:CAT;R:H;)	nucleotide mutations; create mode	GACGCGGTTGCTGCGGGGGTCG	15:1938471-1938471+	T
18:17760592-17760592-|Target-AID|-|G:A|TGC:TAC|nucleotide|(Target-AID;-;@18;NGG;TGC:TAC;C:Y;)	nucleotide mutations; create mode	AGCACAACTCAGTGTGCGAGTGG	18:17760592-17760592-	T
18:17760592-17760592-|Target-AID|-|G:A|TGC:TAC|nucleotide|(Target-AID;-;@18;NG;TGC:TAC;C:Y;)	nucleotide mutations; create mode	AGCACAACTCAGTGTGCGAGTG	18:17760592-17760592-	T
18:49459932-49459932-|Target-AID|+|C:T|TCT:TTT|nucleotide|(Target-AID;+;@17;NG;TCT:TTT;S:F;)	nucleotide mutations; create mode	TTTCTTCATTTATTATTACATG	18:49459932-49459932-	T
18:49459932-49459932-|Target-AID|+|C:T|TCT:TTT|nucleotide|(Target-AID;+;@18;NG;TCT:TTT;S:F;)	nucleotide mutations; create mode	TTCTTCATTTATTATTACATGG	18:49459932-49459932-	T
18:49459932-49459932-|Target-AID|+|C:T|TCT:TTT|nucleotide|(Target-AID;+;@17;NGG;TCT:TTT;S:F;)	nucleotide mutations; create mode	TTTCTTCATTTATTATTACATGG	18:49459932-49459932-	T
2:88166506-88166506-|Target-AID|+|C:T|TCT:TTT|nucleotide|(Target-AID;+;@17;NG;TCT:TTT;S:F;)	nucleotide mutations; create mode	GTTCTTCCACTTGAAAGGTCTG	2:88166506-88166506-	T
2:88166506-88166506-|Target-AID|+|C:T|TCT:TTT|nucleotide|(Target-AID;+;@18;NG;TCT:TTT;S:F;)	nucleotide mutations; create mode	TTCTTCCACTTGAAAGGTCTGG	2:88166506-88166506-	T
2:88166506-88166506-|Target-AID|+|C:T|TCT:TTT|nucleotide|(Target-AID;+;@19;NG;TCT:TTT;S:F;)	nucleotide mutations; create mode	TCTTCCACTTGAAAGGTCTGGG	2:88166506-88166506-	T
2:88166506-88166506-|Target-AID|+|C:T|TCT:TTT|nucleotide|(Target-AID;+;@17;NGG;TCT:TTT;S:F;)	nucleotide mutations; create mode	GTTCTTCCACTTGAAAGGTCTGG	2:88166506-88166506-	T
2:88166506-88166506-|Target-AID|+|C:T|TCT:TTT|nucleotide|(Target-AID;+;@18;NGG;TCT:TTT;S:F;)	nucleotide mutations; create mode	TTCTTCCACTTGAAAGGTCTGGG	2:88166506-88166506-	T
2:88166506-88166506-|Target-AID|+|C:T|TCT:TTT|nucleotide|(Target-AID;+;@19;NGG;TCT:TTT;S:F;)	nucleotide mutations; create mode	TCTTCCACTTGAAAGGTCTGGGG	2:88166506-88166506-	T
15:1073221-1073221+|Target-AID|+|C:T|GCA:GTA|nucleotide|(Target-AID;+;@18;NG;GCA:GTA;A:V;)	nucleotide mutations; create mode	CGCAGCAGCGGCGGCAGGCGCG	15:1073221-1073221+	T
15:1073221-1073221+|Target-AID|+|C:T|GCA:GTA|nucleotide|(Target-AID;+;@19;NG;GCA:GTA;A:V;)	nucleotide mutations; create mode	GCAGCAGCGGCGGCAGGCGCGG	15:1073221-1073221+	T
15:1073221-1073221+|Target-AID|+|C:T|GCA:GTA|nucleotide|(Target-AID;+;@18;NGG;GCA:GTA;A:V;)	nucleotide mutations; create mode	CGCAGCAGCGGCGGCAGGCGCGG	15:1073221-1073221+	T
15:1073221-1073221+|Target-AID|+|C:T|GCA:GTA|nucleotide|(Target-AID;+;@19;NGG;GCA:GTA;A:V;)	nucleotide mutations; create mode	GCAGCAGCGGCGGCAGGCGCGGG	15:1073221-1073221+	T
8:127965988-127965988-|Target-AID|+|C:T|GCC:GTC|nucleotide|(Target-AID;+;@17;NG;GCC:GTC;A:V;)	nucleotide mutations; create mode	GGGCCCCATCTGGGATTCCTGG	8:127965988-127965988-	T
8:127965988-127965988-|Target-AID|+|C:T|GCC:GTC|nucleotide|(Target-AID;+;@17;NGG;GCC:GTC;A:V;)	nucleotide mutations; create mode	GGGCCCCATCTGGGATTCCTGGG	8:127965988-127965988-	T
15:1983513-1983513+|Target-AID|+|C:T|GCC:GTC|nucleotide|(Target-AID;+;@17;NG;GCC:GTC;A:V;)	nucleotide mutations; create mode	TGGCCCAGCGTCTGAGAAGGAG	15:1983513-1983513+	T
18:32229526-32229526-|Target-AID|+|C:T|CCT:CTT|nucleotide|(Target-AID;+;@19;NG;CCT:CTT;P:L;)	nucleotide mutations; create mode	CCTGCCTCAGCCTCCCGAGTAG	18:32229526-32229526-	T
20:3301968-3301968+|Target-AID|+|C:T|CCG:CTG|nucleotide|(Target-AID;+;@19;NG;CCG:CTG;P:L;)	nucleotide mutations; create mode	CCGAAGGCAGTAGGGCGCCACG	20:3301968-3301968+	T
20:3301968-3301968+|Target-AID|+|C:T|CCG:CTG|nucleotide|(Target-AID;+;@19;NGG;CCG:CTG;P:L;)	nucleotide mutations; create mode	CCGAAGGCAGTAGGGCGCCACGG	20:3301968-3301968+	T
12:3733029-3733029+|Target-AID|+|C:T|CCG:CTG|nucleotide|(Target-AID;+;@19;NG;CCG:CTG;P:L;)	nucleotide mutations; create mode	CCGAAATTGCTCTGTGGAGTCG	12:3733029-3733029+	T
12:60838627-60838627+|Target-AID|+|C:T|TCG:TTG|nucleotide|(Target-AID;+;@18;NG;TCG:TTG;S:L;)	nucleotide mutations; create mode	TTCGCACAGCTAACGGCCCGTG	12:60838627-60838627+	T
1:226747307-226747307+|Target-AID|+|C:T|TCA:TTA|nucleotide|(Target-AID;+;@17;NG;TCA:TTA;S:L;)	nucleotide mutations; create mode	CATCAGCCCGCGCCGAAGTCGG	1:226747307-226747307+	T
13:48686461-48686461+|Target-AID|+|C:T|GCA:GTA|nucleotide|(Target-AID;+;@18;NG;GCA:GTA;A:V;)	nucleotide mutations; create mode	GGCAGGAGCCGAAGCAGCAGCG	13:48686461-48686461+	T
9:41309209-41309209+|Target-AID|+|C:T|GCA:GTA|nucleotide|(Target-AID;+;@17;NG;GCA:GTA;A:V;)	nucleotide mutations; create mode	TGGCACTGTCTTACACTTTCAG	9:41309209-41309209+	T
12:61722221-61722221+|Target-AID|+|C:T|CCA:CTA|nucleotide|(Target-AID;+;@19;NG;CCA:CTA;P:L;)	nucleotide mutations; create mode	CCAAAATGGTTATCCAATCATG	12:61722221-61722221+	T
11:48826796-48826796+|ABE|+|A:G|GAG:GGG|nucleotide|(ABE;+;@14;NG;GAG:GGG;E:G;)	nucleotide mutations; create mode	AGAGTGAGCCGAGTACTTGAAG	11:48826796-48826796+	G
11:48826796-48826796+|ABE|+|A:G|GAG:GGG|nucleotide|(ABE;+;@16;NG;GAG:GGG;E:G;)	nucleotide mutations; create mode	AGTGAGCCGAGTACTTGAAGAG	11:48826796-48826796+	G
13:17058401-17058401+|ABE|+|A:G|TAG:TGG|nucleotide|(ABE;+;@14;NG;TAG:TGG;*:W;)	nucleotide mutations; create mode	TAATGTAGAGAATAATTCTAAG	13:17058401-17058401+	G
13:17058401-17058401+|ABE|+|A:G|TAG:TGG|nucleotide|(ABE;+;@14;NGG;TAG:TGG;*:W;)	nucleotide mutations; create mode	TAATGTAGAGAATAATTCTAAGG	13:17058401-17058401+	G
20:2001107-2001107-|ABE|+|A:G|TAT:TGT|nucleotide|(ABE;+;@14;NG;TAT:TGT;Y:C;)	nucleotide mutations; create mode	CTAGGTATGCGGGGCCACCAAG	20:2001107-2001107-	G
1:161952806-161952806-|ABE|+|A:G|TAT:TGT|nucleotide|(ABE;+;@14;NG;TAT:TGT;Y:C;)	nucleotide mutations; create mode	AAAGTTATGAGGAGAGAATACG	1:161952806-161952806-	G
6:74922510-74922510+|ABE|+|A:G|GAC:GGC|nucleotide|(ABE;+;@13;NG;GAC:GGC;D:G;)	nucleotide mutations; create mode	TGCCGCGACGACCAGCTGCCCG	6:74922510-74922510+	G
16:1336394-1336394-|ABE|+|A:G|TAC:TGC|nucleotide|(ABE;+;@15;NG;TAC:TGC;Y:C;)	nucleotide mutations; create mode	GCCCTACTGCCGATGCCAAATG	16:1336394-1336394-	G
14:108237641-108237641-|ABE|+|A:G|TAC:TGC|nucleotide|(ABE;+;@13;NG;TAC:TGC;Y:C;)	nucleotide mutations; create mode	AGGCTTTACATTCTCAAATGTG	14:108237641-108237641-	G
19:10634846-10634846-|ABE|+|A:G|GAT:GGT|nucleotide|(ABE;+;@15;NG;GAT:GGT;D:G;)	nucleotide mutations; create mode	GCTGGATTCAACTATTTAACAG	19:10634846-10634846-	G
17:11851410-11851410-|ABE|+|A:G|CAT:CGT|nucleotide|(ABE;+;@16;NG;CAT:CGT;H:R;)	nucleotide mutations; create mode	TAGCATGTGCCGTGCATTGCTG	17:11851410-11851410-	G
14:114547695-114547695-|ABE|+|A:G|AAG:AGG|nucleotide|(ABE;+;@17;NG;AAG:AGG;K:R;)	nucleotide mutations; create mode	CCAAGCTGCTGTTTCAAGGCCG	14:114547695-114547695-	G
14:124628766-124628766-|ABE|+|A:G|GAG:GGG|nucleotide|(ABE;+;@14;NG;GAG:GGG;E:G;)	nucleotide mutations; create mode	GGTGGGAGGAGTGGAGAGGAAG	14:124628766-124628766-	G
10:47293-47293+|ABE|+|A:G|GAG:GGG|nucleotide|(ABE;+;@14;NG;GAG:GGG;E:G;)	nucleotide mutations; create mode	TGGTTGAGGGGACTTATCTCTG	10:47293-47293+	G
20:23764620-23764620+|ABE|-|T:C|CTA:CCA|nucleotide|(ABE;-;@16;NG;CTA:CCA;L:P;)	nucleotide mutations; create mode	CCCTAGGCCATCCATGAAAGAG	20:23764620-23764620+	G
20:23764620-23764620+|ABE|-|T:C|CTA:CCA|nucleotide|(ABE;-;@14;NG;CTA:CCA;L:P;)	nucleotide mutations; create mode	CTCCCTAGGCCATCCATGAAAG	20:23764620-23764620+	G
9:96281105-96281105-|ABE|-|T:C|TTC:TCC|nucleotide|(ABE;-;@13;NG;TTC:TCC;F:S;)	nucleotide mutations; create mode	CTGTGGGAAAGGCAGTCAGAGG	9:96281105-96281105-	G
6:114449990-114449990-|ABE|-|T:C|GTC:GCC|nucleotide|(ABE;-;@16;NG;GTC:GCC;V:A;)	nucleotide mutations; create mode	TAAGACCTCTTTAGAGCAATTG	6:114449990-114449990-	G
19:38686140-38686140+|ABE|-|T:C|CTG:CCG|nucleotide|(ABE;-;@17;NGG;CTG:CCG;L:P;)	nucleotide mutations; create mode	TCCAGCCTGAGAGAGGGCCAAGG	19:38686140-38686140+	G
19:38686140-38686140+|ABE|-|T:C|CTG:CCG|nucleotide|(ABE;-;@17;NG;CTG:CCG;L:P;)	nucleotide mutations; create mode	TCCAGCCTGAGAGAGGGCCAAG	19:38686140-38686140+	G
19:47544075-47544075-|ABE|-|T:C|CTG:CCG|nucleotide|(ABE;-;@14;NG;CTG:CCG;L:P;)	nucleotide mutations; create mode	GTGTGCAGGCAGACCCCCAGAG	19:47544075-47544075-	G
19:38686977-38686977+|ABE|-|T:C|CTC:CCC|nucleotide|(ABE;-;@14;NGG;CTC:CCC;L:P;)	nucleotide mutations; create mode	CACTGGAGCGCCTCGCGTTCAGG	19:38686977-38686977+	G
19:38686977-38686977+|ABE|-|T:C|CTC:CCC|nucleotide|(ABE;-;@17;NG;CTC:CCC;L:P;)	nucleotide mutations; create mode	TGGAGCGCCTCGCGTTCAGGTG	19:38686977-38686977+	G
19:38686977-38686977+|ABE|-|T:C|CTC:CCC|nucleotide|(ABE;-;@15;NG;CTC:CCC;L:P;)	nucleotide mutations; create mode	ACTGGAGCGCCTCGCGTTCAGG	19:38686977-38686977+	G
19:38686977-38686977+|ABE|-|T:C|CTC:CCC|nucleotide|(ABE;-;@14;NG;CTC:CCC;L:P;)	nucleotide mutations; create mode	CACTGGAGCGCCTCGCGTTCAG	19:38686977-38686977+	G
15:57264970-57264970+|ABE|-|T:C|CTC:CCC|nucleotide|(ABE;-;@14;NG;CTC:CCC;L:P;)	nucleotide mutations; create mode	TTTTGGAGAGTGTTCTCTTTTG	15:57264970-57264970+	G
2:39086591-39086591+|ABE|-|T:C|CTC:CCC|nucleotide|(ABE;-;@15;NG;CTC:CCC;L:P;)	nucleotide mutations; create mode	TCAGGAGGCTGAGGTGCGAGGG	2:39086591-39086591+	G
4:166966433-166966433+|ABE|-|T:C|ATG:ACG|nucleotide|(ABE;-;@16;NG;ATG:ACG;M:T;)	nucleotide mutations; create mode	AGGCATCCTTGTTGACACCAAG	4:166966433-166966433+	G
20:30188274-30188274+|ABE|-|T:C|GTG:GCG|nucleotide|(ABE;-;@16;NGG;GTG:GCG;V:A;)	nucleotide mutations; create mode	AGCCACCTATCTGCACACTCGGG	20:30188274-30188274+	G
20:30188274-30188274+|ABE|-|T:C|GTG:GCG|nucleotide|(ABE;-;@15;NGG;GTG:GCG;V:A;)	nucleotide mutations; create mode	AAGCCACCTATCTGCACACTCGG	20:30188274-30188274+	G
20:30188274-30188274+|ABE|-|T:C|GTG:GCG|nucleotide|(ABE;-;@16;NG;GTG:GCG;V:A;)	nucleotide mutations; create mode	AGCCACCTATCTGCACACTCGG	20:30188274-30188274+	G
20:30188274-30188274+|ABE|-|T:C|GTG:GCG|nucleotide|(ABE;-;@15;NG;GTG:GCG;V:A;)	nucleotide mutations; create mode	AAGCCACCTATCTGCACACTCG	20:30188274-30188274+	G
9:96319427-96319427+|ABE|-|T:C|GTG:GCG|nucleotide|(ABE;-;@16;NGG;GTG:GCG;V:A;)	nucleotide mutations; create mode	CAGCACCGCCCCCTCGGGCTGGG	9:96319427-96319427+	G
9:96319427-96319427+|ABE|-|T:C|GTG:GCG|nucleotide|(ABE;-;@15;NGG;GTG:GCG;V:A;)	nucleotide mutations; create mode	ACAGCACCGCCCCCTCGGGCTGG	9:96319427-96319427+	G
9:96319427-96319427+|ABE|-|T:C|GTG:GCG|nucleotide|(ABE;-;@17;NG;GTG:GCG;V:A;)	nucleotide mutations; create mode	AGCACCGCCCCCTCGGGCTGGG	9:96319427-96319427+	G
9:96319427-96319427+|ABE|-|T:C|GTG:GCG|nucleotide|(ABE;-;@16;NG;GTG:GCG;V:A;)	nucleotide mutations; create mode	CAGCACCGCCCCCTCGGGCTGG	9:96319427-96319427+	G
9:96319427-96319427+|ABE|-|T:C|GTG:GCG|nucleotide|(ABE;-;@15;NG;GTG:GCG;V:A;)	nucleotide mutations; create mode	ACAGCACCGCCCCCTCGGGCTG	9:96319427-96319427+	G
12:127944144-127944144+|ABE|-|T:C|GTG:GCG|nucleotide|(ABE;-;@14;NGG;GTG:GCG;V:A;)	nucleotide mutations; create mode	ACCGCCACAGGGCAGATGGGAGG	12:127944144-127944144+	G
12:127944144-127944144+|ABE|-|T:C|GTG:GCG|nucleotide|(ABE;-;@14;NG;GTG:GCG;V:A;)	nucleotide mutations; create mode	ACCGCCACAGGGCAGATGGGAG	12:127944144-127944144+	G
12:4209332-4209332-|ABE|-|T:C|ATA:ACA|nucleotide|(ABE;-;@14;NG;ATA:ACA;I:T;)	nucleotide mutations; create mode	GATTCTATTTATAAGGCATGTG	12:4209332-4209332-	G
6:58874936-58874936-|ABE|-|T:C|CTA:CCA|nucleotide|(ABE;-;@14;NG;CTA:CCA;L:P;)	nucleotide mutations; create mode	GCTGGTAGAGGGACAGGCTCAG	6:58874936-58874936-	G
8:25856350-25856350+|ABE|-|T:C|GTA:GCA|nucleotide|(ABE;-;@17;NG;GTA:GCA;V:A;)	nucleotide mutations; create mode	CATACTGGCATAGAAACACACG	8:25856350-25856350+	G
9:119758085-119758085+|ABE|+|A:G|AAT:AGT|nucleotide|(ABE;+;@14;NG;AAT:AGT;N:S;)	nucleotide mutations; remove mode	GTCCCAGTGAGCGCGCTGCCCG	9:119758085-119758085+	G
9:119758085-119758085+|ABE|+|A:G|AAT:AGT|nucleotide|(ABE;+;@15;NG;AAT:AGT;N:S;)	nucleotide mutations; remove mode	TCCCAGTGAGCGCGCTGCCCGG	9:119758085-119758085+	G
9:119758085-119758085+|ABE|+|A:G|AAT:AGT|nucleotide|(ABE;+;@17;NG;AAT:AGT;N:S;)	nucleotide mutations; remove mode	CCAGTGAGCGCGCTGCCCGGGG	9:119758085-119758085+	G
9:119758085-119758085+|ABE|+|A:G|AAT:AGT|nucleotide|(ABE;+;@14;NGG;AAT:AGT;N:S;)	nucleotide mutations; remove mode	GTCCCAGTGAGCGCGCTGCCCGG	9:119758085-119758085+	G
9:119758085-119758085+|ABE|+|A:G|AAT:AGT|nucleotide|(ABE;+;@15;NGG;AAT:AGT;N:S;)	nucleotide mutations; remove mode	TCCCAGTGAGCGCGCTGCCCGGG	9:119758085-119758085+	G
9:119758085-119758085+|ABE|+|A:G|AAT:AGT|nucleotide|(ABE;+;@17;NGG;AAT:AGT;N:S;)	nucleotide mutations; remove mode	CCAGTGAGCGCGCTGCCCGGGGG	9:119758085-119758085+	G
1:40303397-40303397-|ABE|+|A:G|AAT:AGT|nucleotide|(ABE;+;@13;NG;AAT:AGT;N:S;)	nucleotide mutations; remove mode	ACTCTGAGTTTTTAAAACACTG	1:40303397-40303397-	G
1:40303397-40303397-|ABE|+|A:G|AAT:AGT|nucleotide|(ABE;+;@14;NG;AAT:AGT;N:S;)	nucleotide mutations; remove mode	CTCTGAGTTTTTAAAACACTGG	1:40303397-40303397-	G
1:40303397-40303397-|ABE|+|A:G|AAT:AGT|nucleotide|(ABE;+;@16;NG;AAT:AGT;N:S;)	nucleotide mutations; remove mode	CTGAGTTTTTAAAACACTGGAG	1:40303397-40303397-	G
1:40303397-40303397-|ABE|+|A:G|AAT:AGT|nucleotide|(ABE;+;@13;NGG;AAT:AGT;N:S;)	nucleotide mutations; remove mode	ACTCTGAGTTTTTAAAACACTGG	1:40303397-40303397-	G
9:18508214-18508214+|ABE|+|A:G|TAA:TGA|nucleotide|(ABE;+;@15;NG;TAA:TGA;*:*;)	nucleotide mutations; remove mode	TCAGTGACCAGCATTCTGTCAG	9:18508214-18508214+	G
9:18508214-18508214+|ABE|+|A:G|TAA:TGA|nucleotide|(ABE;+;@16;NG;TAA:TGA;*:*;)	nucleotide mutations; remove mode	CAGTGACCAGCATTCTGTCAGG	9:18508214-18508214+	G
9:18508214-18508214+|ABE|+|A:G|TAA:TGA|nucleotide|(ABE;+;@15;NGG;TAA:TGA;*:*;)	nucleotide mutations; remove mode	TCAGTGACCAGCATTCTGTCAGG	9:18508214-18508214+	G
16:53822387-53822387-|ABE|+|A:G|TAA:TGA|nucleotide|(ABE;+;@15;NG;TAA:TGA;*:*;)	nucleotide mutations; remove mode	AGCTTGAGACACTCTAGCCAAG	16:53822387-53822387-	G
16:53822387-53822387-|ABE|+|A:G|TAA:TGA|nucleotide|(ABE;+;@15;NGG;TAA:TGA;*:*;)	nucleotide mutations; remove mode	AGCTTGAGACACTCTAGCCAAGG	16:53822387-53822387-	G
5:127799532-127799532+|ABE|+|A:G|TAA:TGA|nucleotide|(ABE;+;@15;NG;TAA:TGA;*:*;)	nucleotide mutations; remove mode	TGACTGATCTGATACTAGCTTG	5:127799532-127799532+	G
4:141200180-141200180+|ABE|+|A:G|AAT:AGT|nucleotide|(ABE;+;@13;NG;AAT:AGT;N:S;)	nucleotide mutations; remove mode	GAGCCCAGTCGGAGCCTGCGAG	4:141200180-141200180+	G
4:141200180-141200180+|ABE|+|A:G|AAT:AGT|nucleotide|(ABE;+;@14;NG;AAT:AGT;N:S;)	nucleotide mutations; remove mode	AGCCCAGTCGGAGCCTGCGAGG	4:141200180-141200180+	G
4:141200180-141200180+|ABE|+|A:G|AAT:AGT|nucleotide|(ABE;+;@13;NGG;AAT:AGT;N:S;)	nucleotide mutations; remove mode	GAGCCCAGTCGGAGCCTGCGAGG	4:141200180-141200180+	G
15:94780104-94780104-|ABE|+|A:G|AAG:AGG|nucleotide|(ABE;+;@16;NG;AAG:AGG;K:R;)	nucleotide mutations; remove mode	TTGAGGTGTAGTGAAATCTTTG	15:94780104-94780104-	G
17:81823729-81823729+|ABE|-|T:C|CTC:CCC|nucleotide|(ABE;-;@14;NG;CTC:CCC;L:P;)	nucleotide mutations; remove mode	TGAATGGGGCAAGGTGAGGGGG	17:81823729-81823729+	G
17:81822417-81822417+|ABE|-|T:C|TTA:TCA|nucleotide|(ABE;-;@16;NG;TTA:TCA;L:S;)	nucleotide mutations; remove mode	AGTTGATCTCGTAAAAGTAGAG	17:81822417-81822417+	G
17:81822417-81822417+|ABE|-|T:C|TTA:TCA|nucleotide|(ABE;-;@14;NG;TTA:TCA;L:S;)	nucleotide mutations; remove mode	TAAGTTGATCTCGTAAAAGTAG	17:81822417-81822417+	G
8:67661305-67661305+|ABE|-|T:C|TTC:TCC|nucleotide|(ABE;-;@17;NG;TTC:TCC;F:S;)	nucleotide mutations; remove mode	CGGGATGCCCAATCCGGAAAAG	8:67661305-67661305+	G
15:1073221-1073221+|ABE|-|T:C|GTA:GCA|nucleotide|(ABE;-;@17;NG;GTA:GCA;V:A;)	nucleotide mutations; remove mode	GCTGCGAGCGAGAGGCAGAGAG	15:1073221-1073221+	G
8:127965988-127965988-|ABE|-|T:C|GTC:GCC|nucleotide|(ABE;-;@17;NG;GTC:GCC;V:A;)	nucleotide mutations; remove mode	GGGGCCCAGACGGTGGCAAAAG	8:127965988-127965988-	G
15:1983513-1983513+|ABE|-|T:C|GTC:GCC|nucleotide|(ABE;-;@16;NGG;GTC:GCC;V:A;)	nucleotide mutations; remove mode	CTGGGCCAGGGCTCTCGTCAGGG	15:1983513-1983513+	G
15:1983513-1983513+|ABE|-|T:C|GTC:GCC|nucleotide|(ABE;-;@17;NG;GTC:GCC;V:A;)	nucleotide mutations; remove mode	TGGGCCAGGGCTCTCGTCAGGG	15:1983513-1983513+	G
15:1983513-1983513+|ABE|-|T:C|GTC:GCC|nucleotide|(ABE;-;@16;NG;GTC:GCC;V:A;)	nucleotide mutations; remove mode	CTGGGCCAGGGCTCTCGTCAGG	15:1983513-1983513+	G
1:159954400-159954400-|ABE|-|T:C|CTG:CCG|nucleotide|(ABE;-;@16;NG;CTG:CCG;L:P;)	nucleotide mutations; remove mode	TGGCGGTACCCAGAGATGACAG	1:159954400-159954400-	G
1:159954890-159954890-|ABE|-|T:C|TTC:TCC|nucleotide|(ABE;-;@16;NG;TTC:TCC;F:S;)	nucleotide mutations; remove mode	CTTGGATTCCTTTTCCCCTTTG	1:159954890-159954890-	G
1:159954909-159954909-|ABE|-|T:C|CTA:CCA|nucleotide|(ABE;-;@17;NGG;CTA:CCA;L:P;)	nucleotide mutations; remove mode	TGTGGCCAGTTGGAGCAGTGGGG	1:159954909-159954909-	G
1:159954909-159954909-|ABE|-|T:C|CTA:CCA|nucleotide|(ABE;-;@17;NG;CTA:CCA;L:P;)	nucleotide mutations; remove mode	TGTGGCCAGTTGGAGCAGTGGG	1:159954909-159954909-	G
6:10330814-10330814-|ABE|-|T:C|CTA:CCA|nucleotide|(ABE;-;@17;NGG;CTA:CCA;L:P;)	nucleotide mutations; remove mode	TTTGGTACAACTTATAGAAAAGG	6:10330814-10330814-	G
6:10330814-10330814-|ABE|-|T:C|CTA:CCA|nucleotide|(ABE;-;@17;NG;CTA:CCA;L:P;)	nucleotide mutations; remove mode	TTTGGTACAACTTATAGAAAAG	6:10330814-10330814-	G
2:42082268-42082268+|ABE|-|T:C|TTG:TCG|nucleotide|(ABE;-;@17;NG;TTG:TCG;L:S;)	nucleotide mutations; remove mode	CCCGATGGGTGCGCTTCTAGCG	2:42082268-42082268+	G
2:42082268-42082268+|ABE|-|T:C|TTG:TCG|nucleotide|(ABE;-;@15;NG;TTG:TCG;L:S;)	nucleotide mutations; remove mode	TGCCCGATGGGTGCGCTTCTAG	2:42082268-42082268+	G
1:226747307-226747307+|ABE|-|T:C|TTA:TCA|nucleotide|(ABE;-;@16;NGG;TTA:TCA;L:S;)	nucleotide mutations; remove mode	GGCTGATGACGCAAGCATCGGGG	1:226747307-226747307+	G
1:226747307-226747307+|ABE|-|T:C|TTA:TCA|nucleotide|(ABE;-;@15;NGG;TTA:TCA;L:S;)	nucleotide mutations; remove mode	GGGCTGATGACGCAAGCATCGGG	1:226747307-226747307+	G
1:226747307-226747307+|ABE|-|T:C|TTA:TCA|nucleotide|(ABE;-;@14;NGG;TTA:TCA;L:S;)	nucleotide mutations; remove mode	CGGGCTGATGACGCAAGCATCGG	1:226747307-226747307+	G
1:226747307-226747307+|ABE|-|T:C|TTA:TCA|nucleotide|(ABE;-;@16;NG;TTA:TCA;L:S;)	nucleotide mutations; remove mode	GGCTGATGACGCAAGCATCGGG	1:226747307-226747307+	G
1:226747307-226747307+|ABE|-|T:C|TTA:TCA|nucleotide|(ABE;-;@15;NG;TTA:TCA;L:S;)	nucleotide mutations; remove mode	GGGCTGATGACGCAAGCATCGG	1:226747307-226747307+	G
1:226747307-226747307+|ABE|-|T:C|TTA:TCA|nucleotide|(ABE;-;@14;NG;TTA:TCA;L:S;)	nucleotide mutations; remove mode	CGGGCTGATGACGCAAGCATCG	1:226747307-226747307+	G
13:23230073-23230073+|ABE|-|T:C|CTC:CCC|nucleotide|(ABE;-;@13;NG;CTC:CCC;L:P;)	nucleotide mutations; remove mode	TCCACTGGGCCGGGCACGGTGG	13:23230073-23230073+	G
9:41309209-41309209+|ABE|-|T:C|GTA:GCA|nucleotide|(ABE;-;@13;NG;GTA:GCA;V:A;)	nucleotide mutations; remove mode	AGACAGTGCCATGATCCTAGAG	9:41309209-41309209+	G
8:40158725-40158725+|ABE|-|T:C|CTT:CCT|nucleotide|(ABE;-;@14;NGG;CTT:CCT;L:P;)	nucleotide mutations; remove mode	GGCCCAGGGAGGCTGCGGAGAGG	8:40158725-40158725+	G
8:40158725-40158725+|ABE|-|T:C|CTT:CCT|nucleotide|(ABE;-;@15;NG;CTT:CCT;L:P;)	nucleotide mutations; remove mode	GCCCAGGGAGGCTGCGGAGAGG	8:40158725-40158725+	G
8:40158725-40158725+|ABE|-|T:C|CTT:CCT|nucleotide|(ABE;-;@14;NG;CTT:CCT;L:P;)	nucleotide mutations; remove mode	GGCCCAGGGAGGCTGCGGAGAG	8:40158725-40158725+	G
16:1960579-1960579+|ABE|-|T:C|CTT:CCT|nucleotide|(ABE;-;@16;NGG;CTT:CCT;L:P;)	nucleotide mutations; remove mode	AGGAGGCTGAGGCAGGAAGCAGG	16:1960579-1960579+	G
16:1960579-1960579+|ABE|-|T:C|CTT:CCT|nucleotide|(ABE;-;@16;NG;CTT:CCT;L:P;)	nucleotide mutations; remove mode	AGGAGGCTGAGGCAGGAAGCAG	16:1960579-1960579+	G
9:101151508-101151508+|ABE|-|T:C|GTC:GCC|nucleotide|(ABE;-;@17;NGG;GTC:GCC;V:A;)	nucleotide mutations; remove mode	CGGGCGCATAGCGGAAAGGGCGG	9:101151508-101151508+	G
9:101151508-101151508+|ABE|-|T:C|GTC:GCC|nucleotide|(ABE;-;@17;NG;GTC:GCC;V:A;)	nucleotide mutations; remove mode	CGGGCGCATAGCGGAAAGGGCG	9:101151508-101151508+	G
2:104626328-104626328-|ABE|-|T:C|CTA:CCA|nucleotide|(ABE;-;@13;NG;CTA:CCA;L:P;)	nucleotide mutations; remove mode	GCCCTATGGGCACACCCACTTG	2:104626328-104626328-	G
20:2001107-2001107-|Target-AID|-|G:A|TGT:TAT|nucleotide|(Target-AID;-;@17;NGG;TGT:TAT;C:Y;)	nucleotide mutations; remove mode	GCATACCTAGTCATGGTAAGTGG	20:2001107-2001107-	T
20:2001107-2001107-|Target-AID|-|G:A|TGT:TAT|nucleotide|(Target-AID;-;@17;NG;TGT:TAT;C:Y;)	nucleotide mutations; remove mode	GCATACCTAGTCATGGTAAGTG	20:2001107-2001107-	T
6:148470741-148470741+|Target-AID|-|G:A|CGG:CAG|nucleotide|(Target-AID;-;@18;NGG;CGG:CAG;R:Q;)	nucleotide mutations; remove mode	CCTGTGTCCTGGGACCAACGAGG	6:148470741-148470741+	T
6:148470741-148470741+|Target-AID|-|G:A|CGG:CAG|nucleotide|(Target-AID;-;@18;NG;CGG:CAG;R:Q;)	nucleotide mutations; remove mode	CCTGTGTCCTGGGACCAACGAG	6:148470741-148470741+	T
6:74922510-74922510+|Target-AID|-|G:A|GGC:GAC|nucleotide|(Target-AID;-;@19;NGG;GGC:GAC;G:D;)	nucleotide mutations; remove mode	GTCGCGGCAGGCAGAGCGCGGGG	6:74922510-74922510+	T
6:74922510-74922510+|Target-AID|-|G:A|GGC:GAC|nucleotide|(Target-AID;-;@18;NGG;GGC:GAC;G:D;)	nucleotide mutations; remove mode	CGTCGCGGCAGGCAGAGCGCGGG	6:74922510-74922510+	T
6:74922510-74922510+|Target-AID|-|G:A|GGC:GAC|nucleotide|(Target-AID;-;@17;NGG;GGC:GAC;G:D;)	nucleotide mutations; remove mode	TCGTCGCGGCAGGCAGAGCGCGG	6:74922510-74922510+	T
6:74922510-74922510+|Target-AID|-|G:A|GGC:GAC|nucleotide|(Target-AID;-;@19;NG;GGC:GAC;G:D;)	nucleotide mutations; remove mode	GTCGCGGCAGGCAGAGCGCGGG	6:74922510-74922510+	T
6:74922510-74922510+|Target-AID|-|G:A|GGC:GAC|nucleotide|(Target-AID;-;@18;NG;GGC:GAC;G:D;)	nucleotide mutations; remove mode	CGTCGCGGCAGGCAGAGCGCGG	6:74922510-74922510+	T
6:74922510-74922510+|Target-AID|-|G:A|GGC:GAC|nucleotide|(Target-AID;-;@17;NG;GGC:GAC;G:D;)	nucleotide mutations; remove mode	TCGTCGCGGCAGGCAGAGCGCG	6:74922510-74922510+	T
14:16252064-16252064-|Target-AID|-|G:A|GGC:GAC|nucleotide|(Target-AID;-;@18;NG;GGC:GAC;G:D;)	nucleotide mutations; remove mode	GGTCTTCGGATTATCCCCTGTG	14:16252064-16252064-	T
14:114547695-114547695-|Target-AID|-|G:A|AGG:AAG|nucleotide|(Target-AID;-;@17;NG;AGG:AAG;R:K;)	nucleotide mutations; remove mode	AGCTTGGGAGCTGTCTCAGCTG	14:114547695-114547695-	T
13:6843731-6843731+|Target-AID|-|G:A|GGT:GAT|nucleotide|(Target-AID;-;@19;NG;GGT:GAT;G:D;)	nucleotide mutations; remove mode	ATCATTAAGGTGACCATGAAAG	13:6843731-6843731+	T
13:63798658-63798658-|Target-AID|+|C:T|CCG:CTG|nucleotide|(Target-AID;+;@18;NG;CCG:CTG;P:L;)	nucleotide mutations; remove mode	GCTGAGAGTCTACTAGTCATTG	13:63798658-63798658-	T
13:63798658-63798658-|Target-AID|+|C:T|CCG:CTG|nucleotide|(Target-AID;+;@18;NGG;CCG:CTG;P:L;)	nucleotide mutations; remove mode	GCTGAGAGTCTACTAGTCATTGG	13:63798658-63798658-	T
8:79829669-79829669+|Target-AID|+|C:T|CCT:CTT|nucleotide|(Target-AID;+;@17;NG;CCT:CTT;P:L;)	nucleotide mutations; remove mode	TACTTAGACCATCATTTTGAAG	8:79829669-79829669+	T
19:55661347-55661347+|Target-AID|+|C:T|CCT:CTT|nucleotide|(Target-AID;+;@17;NG;CCT:CTT;P:L;)	nucleotide mutations; remove mode	TACTTCCTCATACTTCCTGTGG	19:55661347-55661347+	T
19:55661347-55661347+|Target-AID|+|C:T|CCT:CTT|nucleotide|(Target-AID;+;@19;NG;CCT:CTT;P:L;)	nucleotide mutations; remove mode	CTTCCTCATACTTCCTGTGGAG	19:55661347-55661347+	T
6:148471352-148471352+|Target-AID|+|C:T|TCT:TTT|nucleotide|(Target-AID;+;@17;NG;TCT:TTT;S:F;)	nucleotide mutations; remove mode	CCTTTTCACCCCCCAGGTGATG	6:148471352-148471352+	T
19:38686140-38686140+|Target-AID|+|C:T|CCG:CTG|nucleotide|(Target-AID;+;@17;NG;CCG:CTG;P:L;)	nucleotide mutations; remove mode	GGCTGGATGGGAAAGCTGCCTG	19:38686140-38686140+	T
19:38686140-38686140+|Target-AID|+|C:T|CCG:CTG|nucleotide|(Target-AID;+;@18;NG;CCG:CTG;P:L;)	nucleotide mutations; remove mode	GCTGGATGGGAAAGCTGCCTGG	19:38686140-38686140+	T
19:38686140-38686140+|Target-AID|+|C:T|CCG:CTG|nucleotide|(Target-AID;+;@17;NGG;CCG:CTG;P:L;)	nucleotide mutations; remove mode	GGCTGGATGGGAAAGCTGCCTGG	19:38686140-38686140+	T
19:38686140-38686140+|Target-AID|+|C:T|CCG:CTG|nucleotide|(Target-AID;+;@18;NGG;CCG:CTG;P:L;)	nucleotide mutations; remove mode	GCTGGATGGGAAAGCTGCCTGGG	19:38686140-38686140+	T
19:47544075-47544075-|Target-AID|+|C:T|CCG:CTG|nucleotide|(Target-AID;+;@18;NG;CCG:CTG;P:L;)	nucleotide mutations; remove mode	CCTGCACACTCTGGGGAGCTGG	19:47544075-47544075-	T
19:47544075-47544075-|Target-AID|+|C:T|CCG:CTG|nucleotide|(Target-AID;+;@19;NG;CCG:CTG;P:L;)	nucleotide mutations; remove mode	CTGCACACTCTGGGGAGCTGGG	19:47544075-47544075-	T
19:47544075-47544075-|Target-AID|+|C:T|CCG:CTG|nucleotide|(Target-AID;+;@18;NGG;CCG:CTG;P:L;)	nucleotide mutations; remove mode	CCTGCACACTCTGGGGAGCTGGG	19:47544075-47544075-	T
19:47544075-47544075-|Target-AID|+|C:T|CCG:CTG|nucleotide|(Target-AID;+;@19;NGG;CCG:CTG;P:L;)	nucleotide mutations; remove mode	CTGCACACTCTGGGGAGCTGGGG	19:47544075-47544075-	T
14:59124186-59124186+|Target-AID|+|C:T|TCC:TTC|nucleotide|(Target-AID;+;@18;NG;TCC:TTC;S:F;)	nucleotide mutations; remove mode	CTTCAGGGCCCTGGTTGCAGAG	14:59124186-59124186+	T
15:57264970-57264970+|Target-AID|+|C:T|CCC:CTC|nucleotide|(Target-AID;+;@17;NG;CCC:CTC;P:L;)	nucleotide mutations; remove mode	CTCTCCAAAATAATCTGAGATG	15:57264970-57264970+	T
14:83599996-83599996-|Target-AID|+|C:T|ACT:ATT|nucleotide|(Target-AID;+;@19;NG;ACT:ATT;T:I;)	nucleotide mutations; remove mode	ATTCAAAGTCAACACTTAGAAG	14:83599996-83599996-	T
20:57475851-57475851+|Target-AID|+|C:T|TCG:TTG|nucleotide|(Target-AID;+;@17;NG;TCG:TTG;S:L;)	nucleotide mutations; remove mode	GCTTGCAAAGTGCTTCTCCAAG	20:57475851-57475851+	T
12:127943272-127943272+|Target-AID|+|C:T|GCC:GTC|nucleotide|(Target-AID;+;@19;NG;GCC:GTC;A:V;)	nucleotide mutations; remove mode	GTCTCCTGTGGTTTCTCTAGTG	12:127943272-127943272+	T
12:127943272-127943272+|Target-AID|+|C:T|GCC:GTC|nucleotide|(Target-AID;+;@19;NGG;GCC:GTC;A:V;)	nucleotide mutations; remove mode	GTCTCCTGTGGTTTCTCTAGTGG	12:127943272-127943272+	T
16:48961331-48961331-|Target-AID|+|C:T|CCA:CTA|nucleotide|(Target-AID;+;@18;NG;CCA:CTA;P:L;)	nucleotide mutations; remove mode	ACTAGACCTTTTCTTGGTCTTG	16:48961331-48961331-	T
10:19415967-19415967-|Target-AID|+|C:T|GCA:GTA|nucleotide|(Target-AID;+;@19;NG;GCA:GTA;A:V;)	nucleotide mutations; remove mode	GTACTTTATCCAAGTTTTCCTG	10:19415967-19415967-	T
2:103238585-103238585-|Target-AID|+|C:T|TCC:TTC|nucleotide|(Target-AID;+;@18;NG;TCC:TTC;S:F;)	nucleotide mutations; remove mode	TTTCCTCAAGAAGCTCTCTAAG	2:103238585-103238585-	T

## Sheet: Mus musculus
guide: id	mutation format; mode of mutagenesis	guide+PAM sequence	genome coordinate	nucleotide mutation	transcript: id	amino acid mutation	aminoacid: position
ENSMUST00000000137|11|-|20112807|20112852|8|(ABE;-;@16;NG;GTG:GCG;V:A;)	amino acid mutations; create mode	CACCACCTTCCTGCCCTGGCTG			ENSMUST00000000137	A	8
ENSMUST00000001108|5|+|34601385|34601430|22|(Target-AID;-;@18;NG;GAG:GAA;E:E;)	amino acid mutations; create mode	CTCTCCTTGTGAGGGGCTGTGG			ENSMUST00000001108	E	22
ENSMUST00000001566|17|-|35836712|35836757|20|(Target-AID;+;@18;NG;TTC:TTT;F:F;)	amino acid mutations; create mode	TTCTGGGAGGTGATAAGCGATG			ENSMUST00000001566	F	20
ENSMUST00000001583|13|+|75707728|75707773|34|(Target-AID;+;@18;NG;CTC:TTC;L:F;)	amino acid mutations; create mode	AGCTCACCGAGACGGCGATCCG			ENSMUST00000001583	F	34
ENSMUST00000001583|13|+|75707728|75707773|34|(Target-AID;+;@18;NGG;CTC:TTC;L:F;)	amino acid mutations; create mode	AGCTCACCGAGACGGCGATCCGG			ENSMUST00000001583	F	34
ENSMUST00000001720|8|+|109991568|109991613|36|(Target-AID;+;@18;NG;GGC:GGT;G:G;)	amino acid mutations; create mode	GGCAGGAAGGCCAGGTGGAATG			ENSMUST00000001720	G	36
ENSMUST00000001757|13|-|38658933|38658978|13|(ABE;+;@16;NG;AGT:GGT;S:G;)	amino acid mutations; create mode	GAAGAGTCTGGGACTGAAGCCG			ENSMUST00000001757	G	13
ENSMUST00000001757|13|-|38658933|38658978|13|(ABE;+;@17;NG;AGT:GGT;S:G;)	amino acid mutations; create mode	AAGAGTCTGGGACTGAAGCCGG			ENSMUST00000001757	G	13
ENSMUST00000001757|13|-|38658933|38658978|13|(ABE;+;@16;NGG;AGT:GGT;S:G;)	amino acid mutations; create mode	GAAGAGTCTGGGACTGAAGCCGG			ENSMUST00000001757	G	13
ENSMUST00000001757|13|-|38658933|38658978|13|(ABE;+;@17;NGG;AGT:GGT;S:G;)	amino acid mutations; create mode	AAGAGTCTGGGACTGAAGCCGGG			ENSMUST00000001757	G	13
ENSMUST00000001780|12|-|112671513|112671558|9|(ABE;+;@17;NG;GAG:GGG;E:G;)	amino acid mutations; create mode	AGGAGGGCTGGCTGCACAAACG			ENSMUST00000001780	G	9
ENSMUST00000001845|7|-|30194035|30194080|10|(Target-AID;+;@18;NG;GGC:GGT;G:G;)	amino acid mutations; create mode	GGCGGCGGTGGCGGTGGGGGAG			ENSMUST00000001845	G	10
ENSMUST00000001845|7|-|30194035|30194080|10|(Target-AID;+;@19;NG;GGC:GGT;G:G;)	amino acid mutations; create mode	GCGGCGGTGGCGGTGGGGGAGG			ENSMUST00000001845	G	10
ENSMUST00000001845|7|-|30194035|30194080|10|(Target-AID;+;@18;NGG;GGC:GGT;G:G;)	amino acid mutations; create mode	GGCGGCGGTGGCGGTGGGGGAGG			ENSMUST00000001845	G	10
ENSMUST00000001872|2|+|74668591|74668636|102|(ABE;+;@16;NG;GAG:GGG;E:G;)	amino acid mutations; create mode	AAAGAGTGTCCCGCGCCAGCGG			ENSMUST00000001872	G	102
ENSMUST00000001878|2|+|74675338|74675383|92|(ABE;+;@15;NG;GAC:GGC;D:G;)	amino acid mutations; create mode	CAAGGACGGACCCGAAGACCAG			ENSMUST00000001878	G	92
ENSMUST00000001878|2|+|74675338|74675383|92|(ABE;+;@16;NG;GAC:GGC;D:G;)	amino acid mutations; create mode	AAGGACGGACCCGAAGACCAGG			ENSMUST00000001878	G	92
ENSMUST00000001878|2|+|74675338|74675383|92|(ABE;+;@15;NGG;GAC:GGC;D:G;)	amino acid mutations; create mode	CAAGGACGGACCCGAAGACCAGG			ENSMUST00000001878	G	92
ENSMUST00000002063|2|+|127008876|127008921|49|(Target-AID;+;@19;NG;CAC:CAT;H:H;)	amino acid mutations; create mode	ACGTATGCGGCGGGGTTGGCTG			ENSMUST00000002063	H	49
ENSMUST00000002063|2|+|127008876|127008921|49|(Target-AID;+;@19;NGG;CAC:CAT;H:H;)	amino acid mutations; create mode	ACGTATGCGGCGGGGTTGGCTGG			ENSMUST00000002063	H	49
ENSMUST00000002084|X|+|73717057|73717102|17|(Target-AID;-;@18;NG;CGC:CAC;R:H;)	amino acid mutations; create mode	TGCGCTTCAGCGTGGTCACCCG			ENSMUST00000002084	H	17
ENSMUST00000002291|5|-|27791204|27791249|18|(ABE;-;@17;NG;TAC:CAC;Y:H;)	amino acid mutations; create mode	AGTACTTGACCTCGCGGAATAG			ENSMUST00000002291	H	18
ENSMUST00000002469|8|+|71371863|71371908|71|(Target-AID;+;@17;NG;ATC:ATT;I:I;)	amino acid mutations; create mode	GATCGTGTTTGCGGATGAGCTG			ENSMUST00000002469	I	71
ENSMUST00000002469|8|+|71371863|71371908|71|(Target-AID;+;@19;NG;ATC:ATT;I:I;)	amino acid mutations; create mode	TCGTGTTTGCGGATGAGCTGCG			ENSMUST00000002469	I	71
ENSMUST00000002735|17|+|56991338|56991383|109|(Target-AID;-;@19;NG;AAG:AAA;K:K;)	amino acid mutations; create mode	GCTTCTTGTTGCTTTCAGACTG			ENSMUST00000002735	K	109
ENSMUST00000002979|12|+|31265462|31265507|22|(Target-AID;-;@17;NGG;GAA:AAA;E:K;)	amino acid mutations; create mode	CTTCCTTTCTGGAGAGGTAGCGG			ENSMUST00000002979	K	22
ENSMUST00000002979|12|+|31265462|31265507|22|(Target-AID;-;@17;NG;GAA:AAA;E:K;)	amino acid mutations; create mode	CTTCCTTTCTGGAGAGGTAGCG			ENSMUST00000002979	K	22
ENSMUST00000003027|8|+|4238915|4238960|10|(Target-AID;-;@17;NGG;CTG:CTA;L:L;)	amino acid mutations; create mode	GGACAGCTTCTGCTCCAGGGAGG			ENSMUST00000003027	L	10
ENSMUST00000003027|8|+|4238915|4238960|10|(Target-AID;-;@18;NG;CTG:CTA;L:L;)	amino acid mutations; create mode	GACAGCTTCTGCTCCAGGGAGG			ENSMUST00000003027	L	10
ENSMUST00000003027|8|+|4238915|4238960|10|(Target-AID;-;@17;NG;CTG:CTA;L:L;)	amino acid mutations; create mode	GGACAGCTTCTGCTCCAGGGAG			ENSMUST00000003027	L	10
ENSMUST00000003027|8|+|4238915|4238960|10|(Target-AID;+;@19;NG;CTG:TTG;L:L;)	amino acid mutations; create mode	GCTGTCCCGCCTGGAAGCCAAG			ENSMUST00000003027	L	10
ENSMUST00000003274|17|+|55952849|55952894|4|(Target-AID;-;@18;NGG;CTG:CTA;L:L;)	amino acid mutations; create mode	AGCAGCTTGGACATGCTCTGTGG			ENSMUST00000003274	L	4
ENSMUST00000003274|17|+|55952849|55952894|4|(Target-AID;-;@19;NG;CTG:CTA;L:L;)	amino acid mutations; create mode	GCAGCTTGGACATGCTCTGTGG			ENSMUST00000003274	L	4
ENSMUST00000003274|17|+|55952849|55952894|4|(Target-AID;-;@18;NG;CTG:CTA;L:L;)	amino acid mutations; create mode	AGCAGCTTGGACATGCTCTGTG			ENSMUST00000003274	L	4
ENSMUST00000003274|17|+|55952849|55952894|4|(Target-AID;+;@17;NG;CTG:TTG;L:L;)	amino acid mutations; create mode	AAGCTGCTCTTCCTGTCACTTG			ENSMUST00000003274	L	4
ENSMUST00000003544|6|+|149409431|149409476|9|(Target-AID;+;@19;NG;ACG:ATG;T:M;)	amino acid mutations; create mode	ACGGTAGACCAATATAAGACTG			ENSMUST00000003544	M	9
ENSMUST00000003759|2|-|127247590|127247635|3|(Target-AID;-;@19;NGG;GAT:AAT;D:N;)	amino acid mutations; create mode	TCTTTCATGGCGACTGTTTTAGG			ENSMUST00000003759	N	3
ENSMUST00000003759|2|-|127247590|127247635|3|(Target-AID;-;@19;NG;GAT:AAT;D:N;)	amino acid mutations; create mode	TCTTTCATGGCGACTGTTTTAG			ENSMUST00000003759	N	3
ENSMUST00000003946|8|-|107424834|107424879|26|(Target-AID;+;@17;NG;AAC:AAT;N:N;)	amino acid mutations; create mode	GAACATCTACACCATCCGGGAG			ENSMUST00000003946	N	26
ENSMUST00000003946|8|-|107424834|107424879|26|(Target-AID;+;@18;NG;AAC:AAT;N:N;)	amino acid mutations; create mode	AACATCTACACCATCCGGGAGG			ENSMUST00000003946	N	26
ENSMUST00000003946|8|-|107424834|107424879|26|(Target-AID;+;@17;NGG;AAC:AAT;N:N;)	amino acid mutations; create mode	GAACATCTACACCATCCGGGAGG			ENSMUST00000003946	N	26
ENSMUST00000004134|3|+|107895944|107895989|5|(ABE;-;@16;NGG;TCT:CCT;S:P;)	amino acid mutations; create mode	ATAGACTTGGATGACATTTTGGG			ENSMUST00000004134	P	5
ENSMUST00000004134|3|+|107895944|107895989|5|(ABE;-;@17;NG;TCT:CCT;S:P;)	amino acid mutations; create mode	TAGACTTGGATGACATTTTGGG			ENSMUST00000004134	P	5
ENSMUST00000004134|3|+|107895944|107895989|5|(ABE;-;@16;NG;TCT:CCT;S:P;)	amino acid mutations; create mode	ATAGACTTGGATGACATTTTGG			ENSMUST00000004134	P	5
ENSMUST00000004201|9|-|20809955|20810000|71|(ABE;-;@16;NG;TCC:CCC;S:P;)	amino acid mutations; create mode	CTGGACTTGCCCACCCTGAATG			ENSMUST00000004201	P	71
ENSMUST00000004222|16|+|18877467|18877512|3|(ABE;-;@16;NG;CTC:CCC;L:P;)	amino acid mutations; create mode	CAAGAGCTTCATTGTTCGGCCG			ENSMUST00000004222	P	3
ENSMUST00000004281|10|-|118868730|118868775|6|(ABE;-;@17;NGG;CCT:CCC;P:P;)	amino acid mutations; create mode	CGAAGGTTTCCTGGTTAACATGG			ENSMUST00000004281	P	6
ENSMUST00000004281|10|-|118868730|118868775|6|(ABE;-;@17;NG;CCT:CCC;P:P;)	amino acid mutations; create mode	CGAAGGTTTCCTGGTTAACATG			ENSMUST00000004281	P	6
ENSMUST00000004480|16|-|23890609|23890654|38|(ABE;-;@17;NGG;TCT:CCT;S:P;)	amino acid mutations; create mode	GAGACTTCTGCAGAAACTGACGG			ENSMUST00000004480	P	38
ENSMUST00000004480|16|-|23890609|23890654|38|(ABE;-;@17;NG;TCT:CCT;S:P;)	amino acid mutations; create mode	GAGACTTCTGCAGAAACTGACG			ENSMUST00000004480	P	38
[truncated: 406 more rows]

## Sheet: Pan paniscus
guide: id	mutation format; mode of mutagenesis	guide+PAM sequence	genome coordinate	nucleotide mutation	transcript: id	amino acid mutation	aminoacid: position
[truncated: 400 more rows]

[truncated: 2 more sheets: Saccharomyces cerevisiae, Sus scrofa]
